# Supplementary material for: Multi-cohort cross-omics analysis reveals disease mechanisms and therapeutic targets in HTLV-1-associated myelopathy, a neglected retroviral neuroinflammatory disorder
Source: Research Square preprint supplement (doi:10.21203/rs.3.rs-5960764/v1), 2025-04-29
Supplement: Supplementary file 1 [file c06a60567d6123086d535d59.xlsx]

## Sheet: List of Suppl Tables
Supplementary Tables for Assone et al.
Multi-cohort cross-omics analysis reveals disease mechanisms and therapeutic targets in a neglected retroviral neuroinflammatory disease
Suppl. Table 1	Results Regenie GWAS Brazilian cohort
Suppl. Table 2	Multivariable logistic regression PRS-PVL
Suppl. Table 3	Results Tractor GWAS AFR
Suppl. Table 4	Results Tractor GWAS EUR
Suppl. Table 5	Results Tractor GWAS AMR
Suppl. Table 6	Results Tractor GWAS ASN
Suppl. Table 7	Overlap Brazilian and Japanese HAM GWAS
Suppl. Table 8	Results Regenie GWAS PVL
Suppl. Table 9	Results Plasma Metabolomics Brazilian cohort

## Sheet: S1
CHR	POS	SNP	REF	ALT	N	BETA	SE	P
1	832873	1:832873	A	C	713	-0.430172	0.137628	0.00170224
1	841119	1:841119	G	A	713	-1.66696	0.757672	0.0121546
1	874496	1:874496	G	A	713	-0.570675	0.23478	0.0137661
1	895023	1:895023	C	T	713	-1.18429	0.55986	0.0225035
1	956518	1:956518	C	T	713	-0.946458	0.383454	0.0105063
1	970892	1:970892	C	A	713	0.58892	0.207139	0.00399742
1	1052290	1:1052290	T	G	713	0.520095	0.228145	0.021572
1	1055000	1:1055000	T	C	713	-0.311324	0.128915	0.0156106
1	1090691	1:1090691	C	A	713	1.09712	0.461879	0.0145616
1	1110226	1:1110226	C	A	713	-0.850432	0.280554	0.00194908
1	1110782	1:1110782	G	A	713	-0.504534	0.252684	0.0440941
1	1144906	1:1144906	G	A	713	0.408355	0.207724	0.0470945
1	1146573	1:1146573	G	A	713	-0.863418	0.432841	0.0386518
1	1147779	1:1147779	A	G	713	-0.345116	0.153721	0.024707
1	1165477	1:1165477	A	G	713	1.04706	0.353207	0.00246343
1	1173257	1:1173257	A	G	713	-0.378249	0.173625	0.0283133
1	1185156	1:1185156	A	G	713	1.27165	0.527502	0.012613
1	1187088	1:1187088	C	T	713	0.387536	0.146912	0.0079506
1	1189841	1:1189841	A	G	713	-1.36606	0.643231	0.021854
1	1329634	1:1329634	T	C	713	0.834935	0.427959	0.0415155
1	1396486	1:1396486	A	G	713	-0.951883	0.452163	0.0291629
1	1414859	1:1414859	A	G	713	1.15607	0.487287	0.012733
1	1424278	1:1424278	G	A	713	-1.82755	0.917021	0.0158847
1	1426356	1:1426356	A	G	713	-1.04573	0.351662	0.0018517
1	1451833	1:1451833	A	G	713	0.782443	0.286206	0.00529188
1	1499883	1:1499883	T	C	713	-0.695678	0.345597	0.039374
1	1618982	1:1618982	G	A	713	0.308942	0.127871	0.0152996
1	1842235	1:1842235	C	A	713	-0.265674	0.123123	0.0305112
1	1892930	1:1892930	G	T	713	-0.943819	0.378661	0.00889303
1	1903309	1:1903309	G	A	713	-0.30753	0.128372	0.0164843
1	1908966	1:1908966	C	T	713	0.860518	0.436584	0.0435382
1	1911800	1:1911800	C	T	713	1.67133	0.61658	0.00237181
1	1922882	1:1922882	A	G	713	0.555542	0.172748	0.00116958
1	1966299	1:1966299	A	G	713	0.995788	0.492834	0.0369012
1	1969130	1:1969130	A	G	713	1.29005	0.633005	0.0295087
1	1969479	1:1969479	A	G	713	-0.344022	0.15564	0.0265076
1	1976300	1:1976300	T	C	713	-1.19381	0.541082	0.0200882
1	2021579	1:2021579	A	G	713	0.70936	0.323065	0.0248674
1	2022403	1:2022403	T	C	713	0.692976	0.32615	0.0307291
1	2047906	1:2047906	T	C	713	-0.755379	0.332276	0.0194958
1	2055144	1:2055144	A	G	713	1.02872	0.470627	0.0252302
1	2067525	1:2067525	C	T	713	1.09064	0.48559	0.021728
1	2096611	1:2096611	A	G	713	-1.03264	0.372605	0.0043482
1	2125435	1:2125435	T	C	713	1.75261	0.603935	0.0013182
1	2127174	1:2127174	A	G	713	-0.94955	0.385073	0.0111081
1	2190312	1:2190312	A	G	713	1.0751	0.550306	0.0433401
1	2282992	1:2282992	T	C	713	-0.416148	0.133622	0.00174092
1	2287498	1:2287498	G	A	713	-0.611968	0.25859	0.0167521
1	2288000	1:2288000	G	T	713	-0.484865	0.175826	0.00560815
1	2292363	1:2292363	A	G	713	0.950344	0.504639	0.0495621
1	2293845	1:2293845	G	A	713	-0.349091	0.122177	0.00412952
1	2304233	1:2304233	T	C	713	0.382691	0.132944	0.00376981
1	2305581	1:2305581	G	T	713	-1.21552	0.45603	0.00405107
1	2308944	1:2308944	T	C	713	0.721279	0.201938	0.000270402
1	2323077	1:2323077	G	A	713	0.28376	0.12114	0.0187858
1	2334792	1:2334792	T	C	713	-0.535904	0.267925	0.0409035
1	2358816	1:2358816	A	C	713	1.36729	0.596332	0.0120829
1	2424754	1:2424754	G	A	713	1.70895	0.625505	0.00313632
1	2427841	1:2427841	T	C	713	0.43516	0.187073	0.0190805
1	2446799	1:2446799	T	C	713	0.69825	0.293247	0.0153239
1	2454986	1:2454986	A	G	713	-0.722561	0.305015	0.0149972
1	2458710	1:2458710	A	G	713	-1.028	0.341151	0.00181201
1	2475448	1:2475448	T	C	713	0.392849	0.182245	0.0297783
1	2616028	1:2616028	T	C	713	-0.832253	0.408693	0.0352119
1	2624337	1:2624337	T	C	713	1.11661	0.606198	0.0471194
1	2790080	1:2790080	A	G	713	0.698166	0.349264	0.0415633
1	2842572	1:2842572	A	G	713	-0.851166	0.417329	0.0348265
1	2848214	1:2848214	T	C	713	-1.15758	0.626852	0.0382384
1	2868051	1:2868051	G	A	713	0.277913	0.125133	0.025909
1	2884894	1:2884894	T	C	713	0.571829	0.224628	0.00936311
1	2920879	1:2920879	A	G	713	-0.59855	0.225157	0.00702668
1	2948574	1:2948574	A	G	713	-0.883133	0.357547	0.0112476
1	2959960	1:2959960	T	C	713	0.303103	0.140766	0.0308326
1	2987492	1:2987492	G	A	713	-0.371799	0.129596	0.00401208
1	3009098	1:3009098	T	C	713	0.830428	0.397444	0.030297
1	3055921	1:3055921	A	G	713	1.10883	0.578588	0.0449438
1	3064014	1:3064014	T	C	713	-0.520124	0.22287	0.0178464
1	3094460	1:3094460	A	G	713	-0.624374	0.294225	0.0305288
1	3098822	1:3098822	T	C	713	1.64466	0.587577	0.00194599
1	3103682	1:3103682	A	C	713	0.309487	0.154592	0.0447178
1	3124289	1:3124289	A	G	713	-0.937173	0.46696	0.0423945
1	3138221	1:3138221	A	G	713	-1.26289	0.481694	0.0050558
1	3140997	1:3140997	G	T	713	0.603948	0.314953	0.0494629
1	3146223	1:3146223	A	G	713	0.526987	0.168509	0.00147089
1	3164811	1:3164811	A	C	713	0.985372	0.43908	0.0198788
1	3234132	1:3234132	A	G	713	1.05163	0.51116	0.0340604
1	3260824	1:3260824	T	C	713	-2.3329	0.712041	0.000103328
1	3265967	1:3265967	C	A	713	0.325112	0.135913	0.0162368
1	3310385	1:3310385	C	T	713	-0.414533	0.205958	0.0424972
1	3311588	1:3311588	G	T	713	0.411846	0.208301	0.0482525
1	3314960	1:3314960	A	G	713	1.25558	0.608942	0.0357627
1	3315026	1:3315026	T	C	713	-0.71151	0.312316	0.0188586
1	3320645	1:3320645	G	A	713	0.541372	0.25648	0.0329397
1	3342865	1:3342865	C	T	713	-1.64366	0.754476	0.0150373
1	3382304	1:3382304	T	C	713	-1.58455	0.56777	0.00231164
1	3383714	1:3383714	A	G	713	-0.461942	0.203837	0.0224373
1	3402775	1:3402775	A	G	713	1.32812	0.440195	0.00116488
1	3420792	1:3420792	T	G	713	0.579923	0.297007	0.0460829
1	3423316	1:3423316	T	G	713	0.755567	0.393047	0.0474166
1	3433401	1:3433401	A	G	713	0.420972	0.209573	0.0435612
1	3433845	1:3433845	A	G	713	-0.937094	0.486912	0.047597
1	3434816	1:3434816	A	G	713	1.40734	0.552954	0.00474231
1	3435852	1:3435852	A	G	713	-0.591353	0.259628	0.020018
1	3440451	1:3440451	T	C	713	-0.54588	0.169857	0.00115888
1	3495402	1:3495402	T	C	713	-0.267424	0.133046	0.0437794
1	3507349	1:3507349	G	A	713	0.648391	0.244207	0.00718125
1	3507824	1:3507824	A	G	713	0.514871	0.253809	0.0402875
1	3534974	1:3534974	T	C	713	-0.321234	0.136619	0.0184018
1	3554329	1:3554329	A	C	713	-1.45749	0.644904	0.0190867
1	3556388	1:3556388	C	T	713	-0.394351	0.177603	0.0251704
1	3590105	1:3590105	C	T	713	-1.16529	0.495271	0.0141085
1	3601566	1:3601566	A	G	713	1.4055	0.661984	0.0276994
1	3675872	1:3675872	G	T	713	0.382089	0.120873	0.00146366
1	3676243	1:3676243	A	G	713	-0.664154	0.25335	0.00770158
1	3679141	1:3679141	G	A	713	-1.79445	0.769185	0.00968768
1	3692609	1:3692609	A	G	713	-0.384316	0.156408	0.013632
1	3706576	1:3706576	G	A	713	-1.09797	0.391473	0.00348049
1	3709409	1:3709409	A	G	713	0.769089	0.340127	0.0206224
1	3745509	1:3745509	A	G	713	-1.01307	0.515755	0.0353476
1	3760885	1:3760885	T	C	713	1.017	0.50604	0.0390158
1	3779188	1:3779188	T	G	713	1.32854	0.617104	0.0244568
1	3799355	1:3799355	G	A	713	1.01414	0.353357	0.00295468
1	3803057	1:3803057	T	C	713	1.16837	0.602788	0.0325125
1	3806089	1:3806089	A	G	713	-0.531315	0.146745	0.000246439
1	3863775	1:3863775	T	C	713	-0.613179	0.240994	0.0104114
1	3868521	1:3868521	G	A	713	-0.470239	0.209668	0.0229588
1	3888348	1:3888348	A	G	713	-1.1659	0.473979	0.0108318
1	3894325	1:3894325	T	C	713	-0.48883	0.153365	0.00137661
1	3923885	1:3923885	T	C	713	0.560472	0.226482	0.0125271
1	3935282	1:3935282	A	G	713	-1.1503	0.568609	0.0293447
1	3948125	1:3948125	A	G	713	-0.926535	0.457506	0.0370135
1	3956874	1:3956874	C	T	713	-0.316807	0.129754	0.0139601
1	3958719	1:3958719	G	T	713	-0.85457	0.373364	0.0192274
1	4001317	1:4001317	A	G	713	-0.347301	0.169661	0.0389924
1	4004003	1:4004003	T	C	713	-1.3291	0.717915	0.0421396
1	4011339	1:4011339	G	A	713	-0.360015	0.126865	0.00436807
1	4043762	1:4043762	C	T	713	-0.441332	0.146489	0.00234385
1	4044728	1:4044728	C	T	713	-1.74325	0.69579	0.010841
1	4059943	1:4059943	A	G	713	-0.333195	0.168938	0.0477331
1	4063039	1:4063039	T	C	713	0.346881	0.153018	0.0230091
1	4093027	1:4093027	G	T	713	0.288098	0.128461	0.0244754
1	4094488	1:4094488	C	T	713	-0.721748	0.304732	0.0149279
1	4097111	1:4097111	A	C	713	-1.09757	0.547364	0.0396397
1	4102813	1:4102813	G	A	713	1.41592	0.605515	0.0141264
1	4104330	1:4104330	T	C	713	-0.366036	0.143524	0.0104954
1	4118349	1:4118349	T	C	713	-1.31181	0.560192	0.0135769
1	4120496	1:4120496	C	T	713	0.576692	0.256954	0.0228623
1	4125453	1:4125453	G	A	713	0.60818	0.310887	0.0472857
1	4127531	1:4127531	A	G	713	-1.43965	0.554268	0.0055307
1	4135645	1:4135645	T	C	713	1.10499	0.546218	0.0339461
1	4147631	1:4147631	C	T	713	0.690852	0.33565	0.037307
1	4161539	1:4161539	C	T	713	0.299375	0.126331	0.0174193
1	4170403	1:4170403	C	T	713	-0.804473	0.344006	0.0170754
1	4235959	1:4235959	G	T	713	-1.52475	0.793548	0.0302065
1	4261190	1:4261190	C	A	713	1.6427	0.798465	0.019717
1	4268445	1:4268445	A	G	713	0.381604	0.185519	0.0388642
1	4272275	1:4272275	A	G	713	1.49815	0.804991	0.035855
1	4282544	1:4282544	A	G	713	-0.436009	0.133393	0.00100425
1	4286279	1:4286279	T	G	713	-0.42132	0.199944	0.033428
1	4298254	1:4298254	T	C	713	-0.63752	0.284953	0.0227332
1	4302687	1:4302687	C	T	713	-0.740914	0.309607	0.0140133
1	4308156	1:4308156	T	C	713	0.42066	0.194765	0.0289028
1	4353619	1:4353619	T	C	713	-1.30289	0.665982	0.0316082
1	4357901	1:4357901	T	C	713	0.504318	0.184901	0.00588044
1	4384479	1:4384479	T	G	713	-0.420245	0.168794	0.0123868
1	4384591	1:4384591	A	G	713	-1.39813	0.705483	0.0195619
1	4434804	1:4434804	A	G	713	-1.09462	0.565512	0.0429616
1	4444823	1:4444823	G	A	713	-0.536271	0.161253	0.000760536
1	4461988	1:4461988	C	T	713	0.386383	0.127436	0.00229488
1	4483037	1:4483037	A	G	713	-1.13901	0.429399	0.00549959
1	4513008	1:4513008	T	G	713	-0.324074	0.122986	0.00821978
1	4537684	1:4537684	C	T	713	1.12344	0.463297	0.0111048
1	4552306	1:4552306	C	A	713	-0.316397	0.126501	0.0119237
1	4552987	1:4552987	C	T	713	-0.903057	0.423812	0.0291125
1	4571250	1:4571250	A	G	713	-1.23786	0.437384	0.00259896
1	4581739	1:4581739	G	T	713	-0.451046	0.20261	0.0236548
1	4612695	1:4612695	C	T	713	0.339544	0.143337	0.0170714
1	4624030	1:4624030	G	A	713	-0.309785	0.152906	0.0421959
1	4626581	1:4626581	A	G	713	0.406551	0.146549	0.00509742
1	4644163	1:4644163	C	A	713	-0.415097	0.157373	0.00807105
1	4654549	1:4654549	A	G	713	1.12895	0.618606	0.0477936
1	4657331	1:4657331	G	A	713	0.527607	0.197955	0.00698281
1	4659396	1:4659396	T	C	713	1.19691	0.556858	0.0236706
1	4686576	1:4686576	C	T	713	-0.372489	0.132017	0.00448518
1	4692218	1:4692218	G	A	713	-0.367169	0.163795	0.0242153
1	4692878	1:4692878	T	C	713	0.777889	0.336466	0.0172242
1	4693485	1:4693485	T	C	713	1.66855	0.899859	0.0456331
1	4699258	1:4699258	A	G	713	-0.791241	0.236751	0.000670348
1	4704378	1:4704378	G	A	713	-1.18926	0.5933	0.0337381
1	4715681	1:4715681	C	T	713	-1.17145	0.598795	0.0367646
1	4718172	1:4718172	T	C	713	0.262017	0.128551	0.0409525
1	4753300	1:4753300	T	C	713	-0.54893	0.207124	0.0073714
1	4768519	1:4768519	T	C	713	-1.59739	0.674325	0.00988439
1	4774791	1:4774791	T	C	713	0.344785	0.149119	0.0200895
1	4824598	1:4824598	C	T	713	-0.563086	0.246104	0.0209411
1	4834088	1:4834088	C	T	713	-0.52436	0.234929	0.0252017
1	4838773	1:4838773	G	A	713	0.276486	0.131557	0.0349832
1	4850350	1:4850350	A	G	713	0.737582	0.273764	0.00564378
1	4855984	1:4855984	G	A	713	0.264153	0.122453	0.0304768
1	4921547	1:4921547	T	C	713	-0.34755	0.144373	0.0155389
1	4928858	1:4928858	G	T	713	-0.891167	0.448225	0.0404092
1	4938325	1:4938325	G	A	713	0.263759	0.126615	0.0367147
1	4939290	1:4939290	A	G	713	1.16531	0.47759	0.0090962
1	4940910	1:4940910	T	G	713	-0.875588	0.357746	0.0120592
1	4942110	1:4942110	G	A	713	-0.611509	0.220279	0.00471531
1	4958258	1:4958258	C	A	713	-0.289897	0.13109	0.0266753
1	4966181	1:4966181	A	G	713	-0.674365	0.324576	0.0335792
1	4967710	1:4967710	T	G	713	-1.56431	0.554332	0.00235007
1	4972077	1:4972077	C	T	713	-0.416999	0.133187	0.00163249
1	5013179	1:5013179	G	A	713	-0.334926	0.133709	0.0118681
1	5043988	1:5043988	T	G	713	0.516018	0.149666	0.000517095
1	5045716	1:5045716	T	G	713	-1.36152	0.650263	0.0245856
1	5057985	1:5057985	A	G	713	-0.611507	0.314118	0.0474635
1	5091066	1:5091066	A	G	713	1.13012	0.535405	0.0279956
1	5097457	1:5097457	T	C	713	-2.59814	0.836015	0.000187737
1	5109043	1:5109043	A	G	713	-0.937623	0.47078	0.0394112
1	5118325	1:5118325	G	A	713	-1.34213	0.64973	0.0289021
1	5119746	1:5119746	T	C	713	-0.431372	0.166951	0.00919433
1	5136979	1:5136979	T	C	713	-1.39068	0.368835	4.90885e-05
1	5152168	1:5152168	A	G	713	0.369549	0.141007	0.00843315
1	5155225	1:5155225	G	A	713	0.751805	0.357857	0.0308859
1	5178226	1:5178226	A	G	713	-0.671014	0.336083	0.0436506
1	5188107	1:5188107	A	C	713	1.07035	0.541678	0.0398997
1	5198922	1:5198922	C	A	713	-0.292307	0.140697	0.0371689
1	5201694	1:5201694	A	G	713	-1.56043	0.713285	0.0164082
1	5227748	1:5227748	T	C	713	2.15993	0.955653	0.0117368
1	5244448	1:5244448	A	G	713	-1.8048	0.738869	0.00421221
1	5251978	1:5251978	A	C	713	-0.344186	0.157618	0.0277779
1	5253508	1:5253508	G	A	713	0.797243	0.411132	0.0426776
1	5254613	1:5254613	T	C	713	-1.10622	0.572513	0.0398181
1	5280570	1:5280570	A	G	713	0.40958	0.167611	0.014023
1	5382785	1:5382785	T	G	713	1.05565	0.534198	0.0388168
1	5432704	1:5432704	A	G	713	-0.312912	0.145829	0.0310885
1	5441524	1:5441524	A	G	713	1.00151	0.4841	0.0334503
1	5481743	1:5481743	T	C	713	0.505859	0.187681	0.00657113
1	5484586	1:5484586	A	G	713	-1.17271	0.566572	0.0304425
1	5493989	1:5493989	G	A	713	-0.375846	0.15714	0.0162054
1	5498666	1:5498666	G	T	713	-0.350241	0.173782	0.0425167
1	5511121	1:5511121	T	C	713	1.08619	0.450205	0.0122817
1	5512959	1:5512959	C	A	713	1.97337	0.791715	0.00420572
1	5530387	1:5530387	T	C	713	0.384308	0.197067	0.0482103
1	5566035	1:5566035	A	G	713	-1.385	0.606956	0.0146724
1	5579707	1:5579707	G	A	713	-0.388553	0.191575	0.0407277
1	5581725	1:5581725	C	T	713	0.37844	0.154775	0.0140385
1	5584198	1:5584198	A	G	713	0.986615	0.42857	0.0168066
1	5588671	1:5588671	T	C	713	-2.48954	0.901636	0.000398071
1	5602712	1:5602712	A	G	713	-0.342524	0.131653	0.00895303
1	5625551	1:5625551	A	G	713	1.42026	0.581436	0.00966184
1	5634942	1:5634942	T	C	713	-0.938369	0.374079	0.00929544
1	5641991	1:5641991	T	C	713	1.02938	0.533945	0.045414
1	5645744	1:5645744	A	G	713	-0.897997	0.442351	0.0362694
1	5646184	1:5646184	C	A	713	0.341985	0.129573	0.00796489
1	5659471	1:5659471	A	G	713	-0.48854	0.202231	0.0145215
1	5660901	1:5660901	T	C	713	1.03769	0.369745	0.00345064
1	5661337	1:5661337	T	C	713	-0.492369	0.247663	0.0428105
1	5661975	1:5661975	A	G	713	0.707958	0.324526	0.0251241
1	5687576	1:5687576	A	G	713	-0.815313	0.42231	0.0461328
1	5741541	1:5741541	A	C	713	-1.45469	0.682419	0.0174345
1	5743560	1:5743560	C	T	713	-0.402422	0.130165	0.00187077
1	5750449	1:5750449	T	C	713	1.55795	0.692098	0.0133052
1	5777608	1:5777608	A	G	713	0.574215	0.246073	0.0182865
1	5819011	1:5819011	A	G	713	0.510914	0.217589	0.0176828
1	5822636	1:5822636	A	G	713	-0.354337	0.133731	0.0078701
1	5838436	1:5838436	A	G	713	1.79374	0.885951	0.0260369
1	5841869	1:5841869	A	G	713	0.364434	0.182652	0.04495
1	5851606	1:5851606	C	T	713	-0.839497	0.377796	0.0218973
1	5868073	1:5868073	T	C	713	0.938432	0.279865	0.000466756
1	6003761	1:6003761	T	C	713	-0.398012	0.181422	0.0275378
1	6036375	1:6036375	T	C	713	0.316993	0.136268	0.0192526
1	6039056	1:6039056	T	C	713	-1.17642	0.559722	0.0257117
1	6079684	1:6079684	T	C	713	-0.41742	0.197973	0.0330963
1	6080080	1:6080080	T	C	713	0.483819	0.141145	0.000555853
1	6082269	1:6082269	T	C	713	-0.7119	0.36945	0.0490614
1	6138306	1:6138306	A	G	713	0.833425	0.348141	0.0137873
1	6144240	1:6144240	A	C	713	-1.47278	0.652527	0.0168388
1	6148190	1:6148190	G	A	713	-0.523302	0.216251	0.0152107
1	6160902	1:6160902	A	G	713	-0.30675	0.13539	0.0233448
1	6163091	1:6163091	T	G	713	1.42886	0.717705	0.0305872
1	6188626	1:6188626	A	G	713	-1.17148	0.585409	0.0348361
1	6232010	1:6232010	T	C	713	-1.04677	0.452084	0.0135294
1	6279832	1:6279832	T	G	713	-0.640739	0.266151	0.0146751
1	6286482	1:6286482	A	G	713	1.07658	0.509352	0.0251849
1	6359547	1:6359547	A	G	713	0.519172	0.214413	0.0144514
1	6433269	1:6433269	T	C	713	1.12834	0.427049	0.00518239
1	6442292	1:6442292	T	C	713	-1.2689	0.465578	0.00336271
1	6445951	1:6445951	A	C	713	-1.65193	0.669244	0.00673395
1	6464589	1:6464589	C	T	713	-0.970985	0.492557	0.0406528
1	6498667	1:6498667	T	C	713	-0.819511	0.415216	0.0423321
1	6500979	1:6500979	T	C	713	0.75978	0.351839	0.027621
1	6579970	1:6579970	G	T	713	-1.42485	0.722204	0.0311803
1	6580174	1:6580174	A	G	713	1.40985	0.639382	0.0169777
1	6628773	1:6628773	C	A	713	1.10571	0.542147	0.031749
1	6690045	1:6690045	A	G	713	-1.2455	0.650547	0.0405061
1	6729000	1:6729000	T	C	713	0.706007	0.323945	0.0252813
1	6777305	1:6777305	T	C	713	-1.08868	0.406604	0.00485289
1	6836274	1:6836274	G	A	713	-0.979619	0.48211	0.0363521
1	6863772	1:6863772	C	A	713	0.652933	0.266826	0.01275
1	6961655	1:6961655	A	G	713	0.998304	0.449414	0.0201219
1	6976984	1:6976984	T	C	713	0.33798	0.139593	0.0148081
1	6987121	1:6987121	A	G	713	-1.8779	0.761363	0.00567675
1	7005053	1:7005053	C	T	713	1.15356	0.588371	0.0341657
1	7011135	1:7011135	T	C	713	-0.608909	0.221198	0.00526817
1	7053187	1:7053187	A	G	713	0.303675	0.140429	0.029869
1	7069156	1:7069156	G	A	713	-0.627607	0.220344	0.00377537
1	7081922	1:7081922	G	T	713	-0.574828	0.179118	0.00118806
1	7107613	1:7107613	T	C	713	0.652175	0.228171	0.00363362
1	7136885	1:7136885	T	C	713	0.440343	0.223556	0.0466487
1	7159012	1:7159012	T	C	713	1.01352	0.424735	0.0126023
1	7185929	1:7185929	T	C	713	0.88375	0.380777	0.0165021
1	7189489	1:7189489	T	C	713	-0.918585	0.488651	0.0495576
1	7199931	1:7199931	G	A	713	-1.02381	0.544839	0.0474078
1	7258410	1:7258410	A	G	713	0.898897	0.464344	0.0446293
1	7277736	1:7277736	T	C	713	-0.403883	0.160254	0.0113037
1	7289053	1:7289053	C	T	713	-0.471372	0.137619	0.00056238
1	7304994	1:7304994	T	C	713	-0.523917	0.208607	0.0112964
1	7310609	1:7310609	G	T	713	-1.56951	0.675216	0.0118016
1	7323199	1:7323199	C	T	713	0.278926	0.142463	0.0495576
1	7347725	1:7347725	T	C	713	-0.799732	0.415106	0.0439906
1	7350122	1:7350122	T	G	713	0.362186	0.147017	0.0132315
1	7355938	1:7355938	C	T	713	0.807575	0.410545	0.0410421
1	7408390	1:7408390	T	C	713	-0.385533	0.1379	0.00488529
1	7420157	1:7420157	C	T	713	-0.412592	0.174297	0.0170663
1	7421504	1:7421504	A	G	713	1.27337	0.583875	0.0196377
1	7440223	1:7440223	G	A	713	-0.880169	0.40479	0.0232611
1	7445625	1:7445625	T	C	713	0.765462	0.329062	0.0188677
1	7449530	1:7449530	G	A	713	-1.42579	0.637292	0.0165067
1	7452493	1:7452493	G	A	713	0.341616	0.138868	0.013206
1	7466288	1:7466288	G	A	713	0.529125	0.232423	0.0211704
1	7473208	1:7473208	G	A	713	-0.320851	0.154346	0.0363848
1	7531444	1:7531444	A	G	713	-0.663935	0.286429	0.0174614
1	7538512	1:7538512	A	G	713	-0.486913	0.232585	0.0346665
1	7543378	1:7543378	A	C	713	0.309094	0.154455	0.0435291
1	7559621	1:7559621	G	T	713	0.576475	0.280914	0.0394839
1	7571156	1:7571156	C	T	713	-0.578173	0.257398	0.0224962
1	7604711	1:7604711	T	C	713	0.5458	0.200593	0.00583821
1	7614882	1:7614882	C	T	713	-0.685621	0.260489	0.00740611
1	7641173	1:7641173	A	G	713	0.738485	0.248583	0.00254712
1	7641601	1:7641601	T	C	713	-0.37007	0.185307	0.0442619
1	7653086	1:7653086	A	G	713	-1.21638	0.552695	0.019095
1	7665550	1:7665550	T	C	713	0.384968	0.182044	0.0330918
1	7690382	1:7690382	A	G	713	-0.803489	0.376221	0.0309165
1	7694591	1:7694591	T	G	713	0.848665	0.442102	0.0486038
1	7700868	1:7700868	C	T	713	-1.7009	0.707645	0.00805564
1	7701072	1:7701072	C	T	713	-1.00313	0.448181	0.0213182
1	7726437	1:7726437	C	T	713	0.726321	0.371972	0.0469364
1	7781230	1:7781230	T	G	713	-0.800414	0.35388	0.022474
1	7783137	1:7783137	T	C	713	1.02864	0.441446	0.0148672
1	7786210	1:7786210	A	G	713	-0.727943	0.328504	0.0245997
1	7787166	1:7787166	A	G	713	0.510203	0.216341	0.0175772
1	7803884	1:7803884	G	T	713	0.694083	0.319532	0.0274954
1	7911018	1:7911018	G	A	713	-0.311729	0.132137	0.0178953
1	8126684	1:8126684	C	T	713	-1.09223	0.469873	0.0149283
1	8129149	1:8129149	G	A	713	-0.373572	0.132405	0.00456194
1	8137522	1:8137522	G	A	713	-0.835877	0.426377	0.041205
1	8163392	1:8163392	G	A	713	0.324807	0.155741	0.036131
1	8170687	1:8170687	C	T	713	0.881111	0.310779	0.00357932
1	8190399	1:8190399	G	A	713	-1.16417	0.600105	0.0376643
1	8211011	1:8211011	T	C	713	-0.816894	0.427895	0.0469667
1	8292169	1:8292169	T	C	713	-1.2068	0.346545	0.000236646
1	8301235	1:8301235	G	A	713	0.861737	0.294561	0.00226903
1	8305890	1:8305890	T	C	713	-0.73031	0.356858	0.0335135
1	8373952	1:8373952	T	C	713	-0.853172	0.343856	0.0103825
1	8416356	1:8416356	T	C	713	-0.767397	0.369696	0.0336364
1	8417198	1:8417198	C	T	713	-0.801956	0.361739	0.0221238
1	8430543	1:8430543	T	C	713	0.448559	0.179644	0.0117109
1	8649948	1:8649948	G	T	713	-0.813653	0.346122	0.0147581
1	8692561	1:8692561	A	C	713	1.25455	0.671766	0.0461403
1	8718016	1:8718016	T	C	713	1.46816	0.700328	0.0198376
1	8841335	1:8841335	A	G	713	-1.60581	0.454864	0.000162073
1	8866236	1:8866236	T	C	713	1.70714	0.795649	0.0103486
1	8902173	1:8902173	T	C	713	0.740954	0.378631	0.047608
1	8920754	1:8920754	C	T	713	-0.361185	0.145195	0.012426
1	8940966	1:8940966	T	C	713	1.46995	0.745682	0.0214018
1	8948194	1:8948194	A	C	713	-1.93559	0.725678	0.00136628
1	8955070	1:8955070	T	C	713	1.05359	0.476601	0.0218203
1	8959971	1:8959971	T	C	713	-0.703075	0.336222	0.0337878
1	8960226	1:8960226	T	G	713	0.968018	0.423383	0.0191549
1	8964551	1:8964551	T	C	713	0.926357	0.453221	0.0355615
1	9011561	1:9011561	A	G	713	0.876321	0.455157	0.0490987
1	9073814	1:9073814	A	G	713	-1.07643	0.504858	0.0254935
1	9098883	1:9098883	A	G	713	-0.551192	0.281358	0.0457573
1	9102771	1:9102771	A	G	713	-1.34383	0.647999	0.0268547
1	9147673	1:9147673	C	T	713	0.394191	0.141562	0.00509788
1	9199065	1:9199065	A	G	713	1.24254	0.589617	0.0253793
1	9206646	1:9206646	A	G	713	0.593194	0.265542	0.0251004
1	9219109	1:9219109	T	C	713	-0.790892	0.300388	0.00733365
1	9220035	1:9220035	C	T	713	0.4719	0.126198	0.000167417
1	9230776	1:9230776	T	C	713	-1.17824	0.541855	0.0224202
1	9232849	1:9232849	A	G	713	1.9855	0.733438	0.0013441
1	9255788	1:9255788	T	C	713	-0.326254	0.152467	0.0317022
1	9280636	1:9280636	T	C	713	-0.29721	0.127437	0.0192921
1	9304633	1:9304633	T	C	713	0.78986	0.364106	0.0253735
1	9348900	1:9348900	C	A	713	-0.592081	0.197713	0.00237974
1	9352728	1:9352728	G	A	713	0.358173	0.123733	0.00362827
1	9361136	1:9361136	A	C	713	0.313743	0.14116	0.0257211
1	9375943	1:9375943	A	C	713	-1.07647	0.497217	0.0220694
1	9386408	1:9386408	G	A	713	0.275569	0.126572	0.0287919
1	9401941	1:9401941	A	G	713	0.593104	0.231667	0.00904128
1	9416756	1:9416756	C	A	713	-0.344703	0.129629	0.00758438
1	9423329	1:9423329	A	G	713	0.364194	0.185765	0.0493969
1	9435955	1:9435955	T	C	713	-1.00102	0.394399	0.00879995
1	9446692	1:9446692	T	C	713	0.757589	0.366361	0.0367629
1	9475560	1:9475560	A	G	713	-1.07105	0.321107	0.000614795
1	9476438	1:9476438	T	C	713	0.329828	0.139022	0.0170259
1	9495479	1:9495479	T	C	713	0.539419	0.225618	0.0155543
1	9543760	1:9543760	C	T	713	1.07758	0.447648	0.0118435
1	9561362	1:9561362	G	A	713	1.06324	0.546762	0.0410072
1	9683229	1:9683229	A	G	713	1.46846	0.568684	0.00564209
1	9695874	1:9695874	G	A	713	-1.85113	0.677497	0.00170471
1	9829581	1:9829581	G	A	713	0.609959	0.237407	0.00963585
1	9838375	1:9838375	G	A	713	0.461604	0.14152	0.0010397
1	9864462	1:9864462	G	A	713	0.334268	0.153946	0.0292887
1	9882423	1:9882423	A	G	713	-1.1822	0.547304	0.0210044
1	9979304	1:9979304	C	A	713	0.617464	0.311856	0.0458163
1	10016976	1:10016976	T	C	713	-1.17605	0.57585	0.0321507
1	10043073	1:10043073	C	A	713	-0.327326	0.148479	0.0268974
1	10044303	1:10044303	T	C	713	-1.80001	0.76002	0.00789842
1	10054894	1:10054894	C	T	713	0.542138	0.253304	0.0303627
1	10087369	1:10087369	T	C	713	0.770742	0.401414	0.0474941
1	10126506	1:10126506	A	G	713	2.01409	0.683394	0.00097967
1	10135127	1:10135127	G	A	713	1.29642	0.680571	0.0367299
1	10175606	1:10175606	A	G	713	1.15847	0.600874	0.0427189
1	10179154	1:10179154	A	G	713	-1.23521	0.37906	0.000561668
1	10356544	1:10356544	A	G	713	-0.562808	0.245763	0.0202055
1	10501451	1:10501451	A	G	713	-1.41542	0.649782	0.0194809
1	10506038	1:10506038	C	A	713	0.260142	0.131253	0.04685
1	10508405	1:10508405	T	C	713	1.00989	0.322387	0.00109179
1	10568406	1:10568406	G	A	713	-1.02244	0.519537	0.0381092
1	10662397	1:10662397	C	T	713	-0.969965	0.498967	0.0448931
1	10702286	1:10702286	C	A	713	-1.58018	0.725658	0.0212007
1	10704689	1:10704689	T	C	713	1.17105	0.586283	0.0405583
1	10707845	1:10707845	C	T	713	0.304646	0.13242	0.0208439
1	10774522	1:10774522	T	C	713	0.278166	0.128003	0.0289721
1	10802921	1:10802921	G	A	713	-1.4076	0.697886	0.0229367
1	10812171	1:10812171	A	G	713	-0.259894	0.131027	0.0462253
1	10815013	1:10815013	T	C	713	0.333902	0.171209	0.0493753
1	10823918	1:10823918	A	G	713	1.48416	0.532351	0.00293576
1	10827148	1:10827148	T	C	713	-0.536553	0.204122	0.00811989
1	10831246	1:10831246	T	C	713	-1.40733	0.569494	0.00791644
1	10832563	1:10832563	T	C	713	1.62091	0.617687	0.00442344
1	10839783	1:10839783	T	C	713	-0.595453	0.266003	0.0234164
1	10840624	1:10840624	C	T	713	0.972644	0.475839	0.0339024
1	10852191	1:10852191	A	G	713	0.899417	0.43085	0.0305218
1	10912596	1:10912596	G	A	713	0.677885	0.284068	0.015383
1	10925641	1:10925641	G	A	713	-0.88367	0.452481	0.0440362
1	10965500	1:10965500	T	G	713	0.708993	0.334035	0.0312126
1	10990152	1:10990152	G	A	713	0.371031	0.168901	0.0269178
1	11033462	1:11033462	T	C	713	0.607457	0.294925	0.0354266
1	11084858	1:11084858	C	T	713	-1.00888	0.503546	0.0316913
1	11193410	1:11193410	A	C	713	-0.846328	0.406436	0.0325844
1	11389478	1:11389478	G	A	713	-0.654748	0.322745	0.0393206
1	11441123	1:11441123	A	G	713	1.23305	0.528624	0.0158107
1	11441374	1:11441374	C	T	713	-0.498309	0.236504	0.0324923
1	11473908	1:11473908	C	T	713	-1.28292	0.623766	0.030194
1	11501107	1:11501107	A	G	713	-0.45819	0.17003	0.00656629
1	11572508	1:11572508	A	G	713	1.35226	0.592594	0.0152876
1	11595012	1:11595012	G	A	713	-0.388406	0.160934	0.0151852
1	11611074	1:11611074	T	C	713	-1.29558	0.629495	0.0279847
1	11616208	1:11616208	G	A	713	-1.23902	0.547779	0.0181698
1	11625445	1:11625445	C	T	713	-1.24253	0.672273	0.0365183
1	11628256	1:11628256	A	G	713	0.450451	0.221643	0.0401486
1	11661264	1:11661264	A	G	713	-0.579789	0.248705	0.0174365
1	11684914	1:11684914	T	C	713	0.705841	0.362335	0.0476793
1	11687312	1:11687312	C	T	713	1.18656	0.593168	0.0392211
1	11737177	1:11737177	C	T	713	-0.418637	0.198604	0.0336977
1	11766364	1:11766364	G	A	713	-0.987342	0.52501	0.046118
1	11792912	1:11792912	T	C	713	-0.652975	0.327351	0.0441184
1	11825590	1:11825590	G	A	713	-0.43735	0.189032	0.0190458
1	11850405	1:11850405	C	A	713	-0.755915	0.289717	0.00755945
1	11851456	1:11851456	G	A	713	1.46088	0.59336	0.00870222
1	11875109	1:11875109	A	G	713	-0.535589	0.251708	0.0320789
1	11884379	1:11884379	T	C	713	-1.34958	0.731626	0.0466638
1	11889767	1:11889767	G	T	713	-0.314253	0.129398	0.0147194
1	11932229	1:11932229	A	C	713	-0.469015	0.217564	0.0289861
1	11945193	1:11945193	A	G	713	0.705434	0.228699	0.00171763
1	11961649	1:11961649	C	A	713	1.11651	0.539278	0.0294435
1	12037584	1:12037584	T	G	713	-0.785273	0.357248	0.023921
1	12078744	1:12078744	A	G	713	-0.544985	0.238311	0.0200706
1	12104714	1:12104714	A	C	713	1.39879	0.66922	0.0267553
1	12127175	1:12127175	A	G	713	0.579407	0.241744	0.0150765
1	12164246	1:12164246	A	C	713	0.818047	0.26936	0.00179945
1	12178913	1:12178913	T	C	713	0.803375	0.403753	0.0425099
1	12181615	1:12181615	A	G	713	-1.59174	0.651626	0.011008
1	12212496	1:12212496	T	C	713	1.61988	0.682931	0.00816394
1	12220639	1:12220639	G	A	713	-0.784332	0.331605	0.0155629
1	12390380	1:12390380	G	A	713	1.46301	0.737522	0.0182734
1	12418586	1:12418586	G	A	713	0.997534	0.527086	0.038961
1	12457796	1:12457796	T	C	713	1.10261	0.497541	0.022445
1	12477297	1:12477297	G	T	713	-1.03574	0.404348	0.00695264
1	12512102	1:12512102	T	C	713	2.1536	0.74275	0.000501418
1	12521491	1:12521491	C	T	713	-0.493952	0.204445	0.0151688
1	12538038	1:12538038	C	A	713	0.711536	0.349279	0.0384875
1	12555505	1:12555505	A	G	713	-0.584631	0.293265	0.0429754
1	12566579	1:12566579	G	A	713	-0.751559	0.239012	0.00130368
1	12576007	1:12576007	T	G	713	-0.749391	0.325746	0.0208382
1	12577371	1:12577371	C	A	713	0.312028	0.149666	0.0362585
1	12579120	1:12579120	C	T	713	1.36622	0.545833	0.00736444
1	12598051	1:12598051	A	G	713	0.347062	0.124576	0.00510141
1	12609778	1:12609778	G	A	713	-0.62554	0.318868	0.0442313
1	12616603	1:12616603	A	G	713	1.25641	0.480598	0.00498758
1	12634814	1:12634814	G	A	713	-0.970831	0.467298	0.0289175
1	12642850	1:12642850	T	C	713	1.2802	0.623772	0.0276395
1	12693319	1:12693319	C	T	713	-0.475544	0.228319	0.0347928
1	12701922	1:12701922	C	A	713	-0.893025	0.383802	0.0171147
1	12720256	1:12720256	T	C	713	-1.20641	0.435076	0.00358319
1	12765735	1:12765735	C	T	713	1.14143	0.617199	0.0471574
1	12785616	1:12785616	T	G	713	0.901888	0.419055	0.0275093
1	12808315	1:12808315	C	T	713	-0.332877	0.12738	0.00860954
1	12851393	1:12851393	C	T	713	0.469866	0.169583	0.00527169
1	13109660	1:13109660	A	G	713	1.10952	0.376077	0.00180514
1	13115967	1:13115967	T	C	713	-0.343924	0.13119	0.00843199
1	13387211	1:13387211	G	T	713	-1.68021	0.790426	0.0151527
1	13468634	1:13468634	A	G	713	-1.01465	0.36473	0.00398318
1	13476350	1:13476350	G	T	713	0.434291	0.136074	0.00133521
1	13485107	1:13485107	A	G	713	1.18208	0.610507	0.0461434
1	13492978	1:13492978	A	G	713	-1.9034	0.498575	1.80273e-05
1	13495164	1:13495164	A	G	713	1.35061	0.53483	0.00538977
1	13497839	1:13497839	T	C	713	0.350637	0.139244	0.0112595
1	13503851	1:13503851	A	G	713	0.626893	0.257853	0.0139672
1	13536836	1:13536836	T	G	713	-0.400111	0.171126	0.0182936
1	13542032	1:13542032	A	G	713	0.335005	0.14874	0.0237307
1	13562221	1:13562221	G	A	713	0.386155	0.197185	0.0490784
1	13562900	1:13562900	C	T	713	-0.38402	0.145823	0.00819804
1	13595496	1:13595496	A	G	713	-1.0802	0.384735	0.00383478
1	13596975	1:13596975	T	C	713	-0.579062	0.299923	0.0488529
1	13598234	1:13598234	T	C	713	1.68943	0.555372	0.000925657
1	13599205	1:13599205	C	T	713	-1.88646	0.688891	0.00982358
1	13627326	1:13627326	A	C	713	1.0142	0.524209	0.0491258
1	13631141	1:13631141	T	C	713	-0.71896	0.309666	0.0170247
1	13672618	1:13672618	A	G	713	-0.968075	0.367977	0.00693969
1	13721279	1:13721279	T	C	713	-1.47197	0.615046	0.0114148
1	13748073	1:13748073	C	T	713	0.771283	0.300322	0.00851962
1	13805972	1:13805972	A	G	713	-0.972652	0.508864	0.0470815
1	13820108	1:13820108	G	A	713	-0.575995	0.27422	0.0331337
1	13821512	1:13821512	A	G	713	0.301727	0.148533	0.041151
1	13851028	1:13851028	T	C	713	-0.639568	0.270616	0.0150928
1	13893691	1:13893691	G	A	713	-0.286435	0.128588	0.0254877
1	13905382	1:13905382	G	A	713	0.782821	0.356322	0.0266563
1	13905497	1:13905497	G	A	713	-0.307362	0.156969	0.0495644
1	13924425	1:13924425	C	T	713	-0.275301	0.140727	0.0497245
1	13925917	1:13925917	A	G	713	-1.63818	0.745738	0.0121448
1	13954693	1:13954693	G	A	713	0.839666	0.402299	0.0281378
1	13972609	1:13972609	A	C	713	-1.09643	0.495782	0.0187651
1	14004561	1:14004561	C	A	713	0.358846	0.146956	0.0140139
1	14013966	1:14013966	G	A	713	-1.19184	0.495209	0.0102021
1	14027911	1:14027911	A	G	713	-1.11008	0.519717	0.0269805
1	14046749	1:14046749	T	G	713	-0.332572	0.161252	0.0386768
1	14068333	1:14068333	C	T	713	-1.29995	0.540309	0.00886319
1	14077874	1:14077874	C	T	713	-0.474441	0.188492	0.011463
1	14078503	1:14078503	G	A	713	0.863098	0.42283	0.0362527
1	14090672	1:14090672	T	C	713	0.333595	0.160542	0.0371424
1	14114358	1:14114358	T	G	713	0.548301	0.183676	0.0024572
1	14136009	1:14136009	G	T	713	-1.31098	0.696957	0.0402105
1	14139123	1:14139123	G	T	713	-0.823452	0.413331	0.0373852
1	14145826	1:14145826	C	T	713	-0.311048	0.155029	0.043404
1	14155840	1:14155840	T	G	713	0.708497	0.333286	0.0284348
1	14157212	1:14157212	T	G	713	-0.251318	0.126289	0.0456836
1	14217660	1:14217660	A	C	713	0.689578	0.319038	0.0264783
1	14231615	1:14231615	G	A	713	0.30792	0.123085	0.0121711
1	14279453	1:14279453	G	A	713	1.26917	0.685197	0.0420659
1	14310962	1:14310962	C	T	713	-0.593707	0.213317	0.00506617
1	14362986	1:14362986	T	G	713	-0.482141	0.196523	0.013314
1	14372287	1:14372287	A	G	713	-0.623861	0.320741	0.0490998
1	14381269	1:14381269	C	T	713	-1.49301	0.695704	0.0187607
1	14386938	1:14386938	T	C	713	-0.67941	0.328503	0.0360048
1	14425235	1:14425235	C	T	713	-0.464638	0.155061	0.00252825
1	14442154	1:14442154	G	A	713	0.363336	0.165621	0.0269085
1	14461356	1:14461356	A	G	713	-1.35738	0.682352	0.0284813
1	14485285	1:14485285	A	G	713	-0.252982	0.126582	0.0448818
1	14538701	1:14538701	T	C	713	-1.47714	0.780539	0.0317534
1	14551306	1:14551306	T	C	713	-0.307343	0.156506	0.0483871
1	14564512	1:14564512	C	T	713	1.44144	0.562662	0.00772752
1	14582437	1:14582437	C	T	713	1.09861	0.475794	0.0162626
1	14582533	1:14582533	A	G	713	1.35066	0.649081	0.0244692
1	14692645	1:14692645	A	G	713	2.13537	0.775776	0.00101545
1	14791744	1:14791744	A	C	713	-0.337738	0.142618	0.0174578
1	14800168	1:14800168	G	A	713	0.587741	0.287464	0.0369871
1	14804007	1:14804007	T	C	713	-0.545567	0.249244	0.0259992
1	14834969	1:14834969	A	G	713	-1.30536	0.636161	0.0291186
1	14842753	1:14842753	C	T	713	-0.751898	0.304941	0.0118921
1	14842839	1:14842839	C	T	713	-0.26435	0.124495	0.0330994
1	14869639	1:14869639	C	T	713	-0.323304	0.131916	0.0139898
1	14880631	1:14880631	C	A	713	1.5159	0.718532	0.0219472
1	14939018	1:14939018	T	G	713	-0.532685	0.262788	0.0398896
1	14943931	1:14943931	A	G	713	0.492789	0.210869	0.0179275
1	14964876	1:14964876	A	G	713	0.918405	0.48199	0.0447064
1	14983976	1:14983976	G	A	713	-0.906736	0.479938	0.0477705
1	14991227	1:14991227	A	G	713	-0.286923	0.126031	0.022249
1	15005753	1:15005753	G	A	713	-0.730386	0.35255	0.0307171
1	15020779	1:15020779	A	C	713	0.848767	0.417441	0.0344183
1	15044836	1:15044836	C	T	713	-0.684802	0.237027	0.00326565
1	15060821	1:15060821	G	A	713	-1.5845	0.610132	0.00652319
1	15070227	1:15070227	C	T	713	-0.439259	0.19116	0.0206334
1	15106706	1:15106706	A	G	713	-1.15762	0.570756	0.0307178
1	15139598	1:15139598	T	G	713	1.00405	0.497137	0.0371253
1	15186706	1:15186706	C	T	713	-0.780903	0.32258	0.0153844
1	15283675	1:15283675	T	C	713	0.643842	0.24658	0.00794182
1	15321378	1:15321378	A	G	713	-0.280599	0.13284	0.0342507
1	15328675	1:15328675	A	G	713	1.27869	0.538352	0.0122374
1	15367076	1:15367076	A	G	713	-1.16641	0.604012	0.0333557
1	15392393	1:15392393	G	A	713	0.535151	0.220925	0.0139117
1	15483211	1:15483211	T	C	713	-0.258433	0.124586	0.0375362
1	15503397	1:15503397	C	T	713	-0.723374	0.358972	0.0364032
1	15707015	1:15707015	T	C	713	0.748933	0.284442	0.00726424
1	15717297	1:15717297	T	C	713	-1.20544	0.614754	0.0484942
1	15724854	1:15724854	A	C	713	-0.462602	0.197345	0.0183612
1	15734003	1:15734003	A	G	713	-0.772246	0.380043	0.0374921
1	15743433	1:15743433	A	G	713	0.578296	0.236351	0.013155
1	15751891	1:15751891	A	G	713	-0.316743	0.152026	0.0365199
1	15815626	1:15815626	G	T	713	-0.596353	0.306211	0.0493628
1	15858145	1:15858145	A	G	713	-0.5877	0.282255	0.035591
1	15869380	1:15869380	A	G	713	1.16422	0.419182	0.00376123
1	16032759	1:16032759	A	G	713	0.83653	0.423284	0.0395868
1	16060685	1:16060685	A	G	713	0.884861	0.449845	0.0441611
1	16163500	1:16163500	T	C	713	0.866526	0.356622	0.0114699
1	16234813	1:16234813	T	C	713	-0.971388	0.430201	0.018974
1	16416481	1:16416481	T	C	713	1.2348	0.616638	0.0305795
1	16480430	1:16480430	G	A	713	0.284182	0.133976	0.033411
1	16523307	1:16523307	T	C	713	-1.14928	0.609448	0.0412249
1	16676305	1:16676305	A	C	713	-1.84612	0.770296	0.00474668
1	16975177	1:16975177	C	T	713	0.265401	0.127428	0.0368545
1	17054580	1:17054580	T	C	713	0.895625	0.404335	0.019507
1	17117985	1:17117985	G	A	713	-0.36984	0.126401	0.00322174
1	17158259	1:17158259	T	C	713	-1.35032	0.69648	0.0476069
1	17171833	1:17171833	T	C	713	-1.16655	0.449707	0.00672775
1	17174991	1:17174991	T	C	713	0.948458	0.443324	0.027034
1	17193513	1:17193513	A	G	713	-0.468625	0.137423	0.000603657
1	17195644	1:17195644	C	T	713	1.10047	0.499044	0.0215794
1	17201452	1:17201452	T	C	713	-1.38448	0.596573	0.0112233
1	17203706	1:17203706	T	C	713	0.276102	0.126776	0.0287257
1	17208914	1:17208914	A	G	713	0.664951	0.239827	0.00497141
1	17233884	1:17233884	T	C	713	-0.298999	0.135472	0.0267024
1	17273044	1:17273044	T	C	713	1.1308	0.477738	0.0129116
1	17299641	1:17299641	G	T	713	-1.22474	0.51879	0.0119476
1	17309868	1:17309868	A	G	713	-0.324334	0.140351	0.0200646
1	17337356	1:17337356	A	G	713	1.14241	0.565102	0.029591
1	17339831	1:17339831	G	T	713	-0.569488	0.259919	0.0266416
1	17368245	1:17368245	A	G	713	-1.60771	0.527216	0.00133586
1	17389464	1:17389464	A	G	713	-1.53362	0.668105	0.0121202
1	17392565	1:17392565	G	A	713	0.482845	0.233273	0.0361785
1	17457568	1:17457568	T	C	713	0.593578	0.272083	0.0246212
1	17512953	1:17512953	T	C	713	1.70406	0.688164	0.00685693
1	17540502	1:17540502	T	C	713	0.925894	0.455224	0.0383557
1	17560792	1:17560792	C	T	713	0.450552	0.189426	0.0161139
1	17582446	1:17582446	C	T	713	1.5434	0.602203	0.00485825
1	17589338	1:17589338	C	T	713	0.306234	0.136636	0.024124
1	17591568	1:17591568	A	G	713	-0.263246	0.122418	0.0310792
1	17631543	1:17631543	T	C	713	-2.59166	0.827873	0.000282716
1	17638699	1:17638699	A	G	713	-0.797023	0.216751	0.00017876
1	17666127	1:17666127	G	A	713	-0.568013	0.211463	0.00660526
1	17667235	1:17667235	G	A	713	-0.894144	0.461597	0.044502
1	17709058	1:17709058	A	G	713	-0.486878	0.143094	0.000592966
1	17732749	1:17732749	C	T	713	-0.588064	0.284343	0.0356057
1	17781429	1:17781429	G	T	713	-0.285876	0.131276	0.0288556
1	17781840	1:17781840	T	C	713	1.23825	0.598549	0.0278779
1	17784251	1:17784251	C	A	713	-0.573992	0.183758	0.00162439
1	17785000	1:17785000	T	G	713	-0.439111	0.164679	0.00730079
1	17796601	1:17796601	T	C	713	0.999979	0.490917	0.0332889
1	17833038	1:17833038	C	A	713	0.444114	0.190758	0.0191624
1	17852060	1:17852060	C	A	713	0.724322	0.321758	0.0213673
1	17857636	1:17857636	A	C	713	-1.21633	0.562885	0.0173572
1	17916380	1:17916380	A	C	713	-1.48888	0.523205	0.00225139
1	17938198	1:17938198	T	C	713	-1.14127	0.329814	0.000386322
1	17950977	1:17950977	T	C	713	0.870218	0.342445	0.00829965
1	17979141	1:17979141	A	G	713	0.470416	0.196822	0.0159978
1	17996548	1:17996548	C	A	713	1.46844	0.590593	0.00545595
1	17997416	1:17997416	C	A	713	-0.264437	0.129598	0.0407437
1	18011924	1:18011924	T	C	713	0.844345	0.280313	0.00201391
1	18013531	1:18013531	A	G	713	0.444225	0.146987	0.00235738
1	18041122	1:18041122	G	A	713	-0.371664	0.144011	0.00927107
1	18057626	1:18057626	A	G	713	-1.74438	0.567522	0.000901467
1	18077363	1:18077363	C	T	713	-0.611327	0.276297	0.023362
1	18099677	1:18099677	T	C	713	-1.11683	0.563763	0.0351261
1	18131006	1:18131006	T	C	713	0.507082	0.180521	0.00454527
1	18140659	1:18140659	T	C	713	-0.272646	0.125464	0.0291434
1	18140899	1:18140899	A	G	713	1.06411	0.413781	0.00847735
1	18149905	1:18149905	T	C	713	1.58262	0.438853	8.15831e-05
1	18161222	1:18161222	A	G	713	-0.404473	0.144491	0.00481282
1	18164978	1:18164978	G	T	713	0.278586	0.128332	0.0295087
1	18186983	1:18186983	A	C	713	-0.450534	0.167253	0.00676192
1	18190495	1:18190495	T	C	713	0.337322	0.127186	0.00782096
1	18205239	1:18205239	G	A	713	-0.394039	0.173129	0.0217145
1	18211433	1:18211433	A	G	713	-1.29038	0.610085	0.0319757
1	18237558	1:18237558	C	T	713	-0.771025	0.397248	0.0494151
1	18240357	1:18240357	C	T	713	-0.399173	0.162247	0.0132718
1	18268177	1:18268177	T	C	713	1.34553	0.513713	0.00521099
1	18284592	1:18284592	T	C	713	0.744055	0.386574	0.0482048
1	18287828	1:18287828	T	C	713	-0.327186	0.149549	0.028035
1	18296527	1:18296527	A	G	713	-1.3099	0.553458	0.0119124
1	18321228	1:18321228	A	G	713	-1.38362	0.768787	0.0495142
1	18330113	1:18330113	G	T	713	-1.40683	0.729086	0.0331619
1	18332805	1:18332805	T	G	713	-0.52734	0.271219	0.0499149
1	18336833	1:18336833	A	G	713	-0.989	0.315519	0.00131241
1	18368651	1:18368651	T	C	713	-0.684395	0.327684	0.032643
1	18369525	1:18369525	T	C	713	0.3273	0.148424	0.0269507
1	18387497	1:18387497	T	C	713	-1.00217	0.433129	0.0151695
1	18394429	1:18394429	T	C	713	-0.442895	0.140695	0.00153638
1	18437554	1:18437554	G	T	713	-1.4857	0.66956	0.013494
1	18478053	1:18478053	T	C	713	0.552162	0.21303	0.00867321
1	18478189	1:18478189	G	A	713	1.23928	0.442439	0.00315428
1	18485174	1:18485174	T	C	713	0.380471	0.139494	0.0061823
1	18489567	1:18489567	C	T	713	-1.33937	0.579734	0.0149679
1	18523560	1:18523560	A	G	713	0.483495	0.164384	0.00297852
1	18538796	1:18538796	T	C	713	1.53113	0.52424	0.0017773
1	18563700	1:18563700	G	A	713	-1.26375	0.541595	0.0133337
1	18597817	1:18597817	A	G	713	-1.13708	0.521824	0.0176583
1	18617550	1:18617550	A	G	713	-0.344195	0.171579	0.044366
1	18623185	1:18623185	C	A	713	-0.805883	0.394602	0.0366505
1	18633688	1:18633688	A	G	713	-1.19237	0.631244	0.0401236
1	18664748	1:18664748	A	G	713	1.98053	0.783872	0.00271788
1	18666967	1:18666967	C	T	713	-0.266436	0.123616	0.0306295
1	18684273	1:18684273	T	G	713	0.889224	0.300624	0.00238419
1	18711842	1:18711842	T	G	713	-1.00993	0.455404	0.0215879
1	18716001	1:18716001	T	C	713	1.49251	0.707159	0.0204066
1	18730531	1:18730531	G	A	713	-1.4292	0.540641	0.00416476
1	18731236	1:18731236	A	G	713	0.351523	0.143618	0.0138143
1	18745823	1:18745823	A	G	713	1.41672	0.669266	0.0239541
1	18761457	1:18761457	G	A	713	-0.696643	0.242403	0.00332055
1	18769469	1:18769469	A	G	713	0.315443	0.12309	0.0100807
1	18796985	1:18796985	T	G	713	-0.905429	0.258232	0.000354169
1	18814157	1:18814157	A	G	713	0.354242	0.144377	0.0137604
1	18818726	1:18818726	A	G	713	-2.04925	0.641585	0.000202279
1	18834189	1:18834189	T	C	713	-0.802024	0.251336	0.00102783
1	18839136	1:18839136	A	G	713	0.338098	0.125589	0.00679313
1	18855240	1:18855240	T	C	713	1.59244	0.70182	0.0118203
1	18879539	1:18879539	G	A	713	1.08101	0.531722	0.0346139
1	18887426	1:18887426	C	T	713	0.609066	0.230227	0.00696707
1	18888139	1:18888139	A	G	713	0.34923	0.172709	0.0420969
1	18888154	1:18888154	A	G	713	1.52378	0.608456	0.00731493
1	18923049	1:18923049	T	C	713	-0.331782	0.138224	0.0159661
1	18951121	1:18951121	A	G	713	-0.939837	0.460918	0.0355279
1	19013491	1:19013491	A	G	713	-1.43258	0.702377	0.0255282
1	19039694	1:19039694	T	C	713	-0.343314	0.158465	0.0297358
1	19088320	1:19088320	A	G	713	0.426944	0.132666	0.00125135
1	19153030	1:19153030	T	C	713	-0.858459	0.37795	0.0187068
1	19194663	1:19194663	A	G	713	-1.1958	0.345541	0.000371552
1	19211920	1:19211920	T	C	713	3.34511	1.49332	0.000581072
1	19212955	1:19212955	A	G	713	1.56757	0.652889	0.00996369
1	19221924	1:19221924	A	G	713	-0.417652	0.203514	0.0386278
1	19283028	1:19283028	G	A	713	-0.513513	0.14043	0.000236548
1	19291026	1:19291026	A	G	713	-1.68952	0.680337	0.00736563
1	19299791	1:19299791	T	G	713	0.521809	0.24062	0.0282501
1	19314204	1:19314204	A	G	713	-1.02294	0.443448	0.0155611
1	19318876	1:19318876	C	T	713	-1.08441	0.591813	0.0478961
1	19341705	1:19341705	G	A	713	-0.550734	0.245948	0.0240752
1	19342925	1:19342925	T	C	713	1.44442	0.749685	0.0235641
1	19355675	1:19355675	A	G	713	0.530009	0.201847	0.00774569
1	19369883	1:19369883	T	C	713	-1.69196	0.696898	0.00866144
1	19429974	1:19429974	C	T	713	0.929847	0.471787	0.0404408
1	19457445	1:19457445	A	G	713	-0.357367	0.123361	0.00372778
1	19473135	1:19473135	C	A	713	-0.512387	0.18643	0.00550085
1	19485444	1:19485444	T	C	713	1.39309	0.68744	0.0280375
1	19535826	1:19535826	C	T	713	0.345852	0.15148	0.021683
1	19555067	1:19555067	T	C	713	1.04602	0.363805	0.00251044
1	19634330	1:19634330	T	C	713	-0.343089	0.173583	0.0464056
1	19647891	1:19647891	A	G	713	-1.38437	0.518845	0.00429764
1	19661982	1:19661982	T	G	713	-1.10899	0.509721	0.0267498
1	19662401	1:19662401	G	A	713	0.391816	0.196027	0.0442762
1	19665481	1:19665481	T	C	713	1.57041	0.691908	0.0119989
1	19677450	1:19677450	T	C	713	-1.23526	0.495073	0.00726675
1	19700213	1:19700213	T	G	713	-1.13616	0.439382	0.00758193
1	19716350	1:19716350	T	C	713	-1.00054	0.493499	0.0362435
1	19728773	1:19728773	A	C	713	-0.492236	0.202421	0.014312
1	19736204	1:19736204	T	C	713	-1.45981	0.544701	0.00320221
1	19736953	1:19736953	T	C	713	-0.468689	0.20108	0.0182478
1	19742038	1:19742038	C	A	713	0.341246	0.154823	0.0270726
1	19746653	1:19746653	A	G	713	0.400926	0.158664	0.0110826
1	19753309	1:19753309	G	A	713	1.25943	0.579317	0.0235977
1	19772963	1:19772963	A	G	713	-0.671398	0.33069	0.03804
1	19785914	1:19785914	A	G	713	-0.757214	0.319361	0.0150248
1	19787491	1:19787491	T	C	713	0.881118	0.464588	0.0482381
1	19789053	1:19789053	A	C	713	-1.33098	0.566531	0.0127997
1	19845021	1:19845021	T	G	713	0.423752	0.123477	0.000549554
1	19850577	1:19850577	T	C	713	0.880977	0.367309	0.0135903
1	19854919	1:19854919	T	C	713	0.828292	0.399002	0.0324594
1	19861137	1:19861137	A	G	713	-0.886252	0.277468	0.00082429
1	19864179	1:19864179	A	G	713	0.36544	0.155236	0.0177812
1	19932206	1:19932206	G	A	713	-0.441101	0.140857	0.00163772
1	19943216	1:19943216	C	T	713	-1.75739	0.473127	5.30237e-05
1	19953230	1:19953230	T	C	713	1.21524	0.35974	0.000350235
1	19956456	1:19956456	A	G	713	-1.51503	0.713632	0.0195844
1	19972659	1:19972659	C	T	713	0.294104	0.135922	0.0295135
1	19992700	1:19992700	G	A	713	-1.20526	0.518081	0.0137949
1	20096606	1:20096606	G	T	713	0.290339	0.131491	0.0267122
1	20097832	1:20097832	G	T	713	-0.64501	0.299338	0.0287707
1	20111271	1:20111271	C	A	713	0.279134	0.126937	0.0273602
1	20130356	1:20130356	C	T	713	-1.39747	0.489171	0.00187958
1	20151189	1:20151189	A	G	713	-0.474938	0.230869	0.0388687
1	20248314	1:20248314	T	C	713	0.997603	0.527658	0.0462477
1	20257546	1:20257546	A	G	713	-1.12823	0.391017	0.00293035
1	20282621	1:20282621	C	T	713	-0.309014	0.133478	0.0203053
1	20299054	1:20299054	G	A	713	-1.14345	0.467321	0.0100448
1	20321827	1:20321827	A	C	713	0.81064	0.350114	0.0184226
1	20398421	1:20398421	T	C	713	1.14888	0.569804	0.0331345
1	20432738	1:20432738	A	C	713	-0.402415	0.129323	0.0017396
1	20477572	1:20477572	T	G	713	-0.309817	0.137764	0.0240807
1	20500392	1:20500392	C	T	713	-1.70436	0.611106	0.00213
1	20566263	1:20566263	A	G	713	-1.05106	0.520935	0.0335166
1	20579146	1:20579146	T	C	713	-1.96786	0.7064	0.0026743
1	20613277	1:20613277	T	C	713	-0.326662	0.144355	0.023237
1	20668203	1:20668203	A	G	713	-1.49191	0.671819	0.017338
1	20671214	1:20671214	A	G	713	-0.551777	0.268317	0.0366345
1	20697254	1:20697254	A	C	713	-0.540433	0.227831	0.0165421
1	20712475	1:20712475	A	G	713	1.01536	0.505473	0.0357075
1	20713193	1:20713193	G	A	713	-0.377403	0.189852	0.045631
1	20729889	1:20729889	T	C	713	0.284359	0.127965	0.025633
1	20761434	1:20761434	A	G	713	-0.413351	0.175348	0.0175979
1	20765644	1:20765644	G	T	713	-1.20725	0.640529	0.0470262
1	20766272	1:20766272	T	C	713	2.48344	1.24787	0.00948287
1	20857087	1:20857087	T	C	713	-1.07572	0.527335	0.0352128
1	21148478	1:21148478	A	G	713	2.32652	1.2436	0.0190117
1	21218108	1:21218108	T	C	713	-0.39076	0.139596	0.00494732
1	21248995	1:21248995	T	C	713	-0.818252	0.428181	0.0489317
1	21253659	1:21253659	G	A	713	0.333922	0.161563	0.0381865
1	21294571	1:21294571	A	C	713	-0.621578	0.287063	0.0285878
1	21303663	1:21303663	G	T	713	-0.43392	0.201694	0.0303228
1	21360895	1:21360895	T	C	713	-0.836184	0.24776	0.000593321
1	21400194	1:21400194	G	A	713	-0.260526	0.131968	0.0481537
1	21433152	1:21433152	T	C	713	-1.47025	0.675881	0.0156787
1	21458996	1:21458996	C	A	713	-0.370747	0.165264	0.0244613
1	21516384	1:21516384	T	C	713	0.258351	0.12727	0.0417869
1	21558840	1:21558840	T	C	713	-1.32361	0.599014	0.0196205
1	21601355	1:21601355	T	C	713	-0.308626	0.151064	0.040307
1	21617629	1:21617629	T	C	713	-1.07601	0.563708	0.0478465
1	21620723	1:21620723	T	C	713	0.870797	0.409667	0.0267492
1	21633691	1:21633691	A	G	713	-1.50859	0.700622	0.017944
1	21640884	1:21640884	T	C	713	0.704662	0.321482	0.0253893
1	21646401	1:21646401	A	G	713	-1.16046	0.416419	0.00344405
1	21648052	1:21648052	A	G	713	-0.92799	0.310818	0.00188287
1	21648341	1:21648341	C	T	713	-0.29628	0.135161	0.0280214
1	21653456	1:21653456	A	G	713	0.417758	0.195585	0.0321684
1	21657720	1:21657720	T	C	713	-0.491519	0.237883	0.0376981
1	21667941	1:21667941	C	A	713	0.383194	0.155569	0.0132687
1	21692082	1:21692082	A	G	713	-1.41516	0.54531	0.00495713
1	21694493	1:21694493	A	C	713	-0.990688	0.492397	0.0349293
1	21708509	1:21708509	C	T	713	-0.366521	0.137585	0.00756554
1	21748500	1:21748500	A	G	713	-1.20093	0.527142	0.0166445
1	21807205	1:21807205	T	G	713	-0.937312	0.367597	0.00869101
1	21864961	1:21864961	G	A	713	-0.277474	0.141005	0.0479325
1	21875639	1:21875639	T	C	713	1.30403	0.582993	0.0171372
1	21876363	1:21876363	G	T	713	-0.915734	0.433641	0.0286293
1	21899673	1:21899673	G	T	713	0.399269	0.151763	0.00819955
1	21954435	1:21954435	T	C	713	-0.845436	0.293367	0.00349438
1	21960589	1:21960589	A	G	713	0.784591	0.354495	0.0206106
1	22023122	1:22023122	G	A	713	0.270585	0.125471	0.0307199
1	22034243	1:22034243	T	G	713	-1.10625	0.548585	0.0336434
1	22043837	1:22043837	A	C	713	0.673684	0.290168	0.0179829
1	22068132	1:22068132	G	A	713	0.700978	0.259305	0.00589251
1	22122867	1:22122867	T	C	713	0.868241	0.409295	0.0281722
1	22133085	1:22133085	A	G	713	-1.61333	0.768751	0.0245053
1	22165030	1:22165030	T	G	713	-0.721835	0.366468	0.0433681
1	22171881	1:22171881	T	C	713	-0.259064	0.121074	0.0317987
1	22187644	1:22187644	A	C	713	-0.968902	0.43704	0.0202582
1	22210880	1:22210880	A	G	713	0.889257	0.447616	0.038376
1	22211535	1:22211535	A	G	713	-0.297002	0.122726	0.0151677
1	22244591	1:22244591	T	C	713	-1.4642	0.678908	0.0219599
1	22267312	1:22267312	A	C	713	-1.41492	0.741762	0.0384123
1	22268706	1:22268706	A	G	713	0.378468	0.146862	0.00947851
1	22305817	1:22305817	T	C	713	0.412786	0.187768	0.0269786
1	22312543	1:22312543	T	C	713	1.44586	0.592782	0.00727143
1	22316054	1:22316054	A	G	713	-1.57134	0.529164	0.00216391
1	22401623	1:22401623	G	A	713	0.416941	0.140798	0.00288012
1	22406025	1:22406025	C	T	713	-0.395303	0.178197	0.0258631
1	22412116	1:22412116	T	G	713	0.609757	0.29804	0.0389135
1	22422322	1:22422322	C	A	713	-1.79634	0.746642	0.00697798
1	22539797	1:22539797	A	C	713	0.279688	0.132055	0.0332453
1	22549843	1:22549843	T	C	713	0.338184	0.162734	0.0364536
1	22585802	1:22585802	T	C	713	2.51102	0.960151	0.00115194
1	22585948	1:22585948	G	A	713	-0.320398	0.126518	0.0110729
1	22594751	1:22594751	G	A	713	-1.80749	0.730385	0.00345191
1	22594970	1:22594970	C	A	713	-0.67368	0.209357	0.00119702
1	22597971	1:22597971	C	T	713	-0.41089	0.148893	0.00544164
1	22619484	1:22619484	A	G	713	-1.40538	0.725873	0.0303082
1	22635477	1:22635477	T	G	713	0.973961	0.456066	0.0247548
1	22637472	1:22637472	C	T	713	1.05524	0.509785	0.0322337
1	22678346	1:22678346	T	G	713	-1.73223	0.774487	0.0148844
1	22695984	1:22695984	T	C	713	-1.14589	0.582946	0.0405397
1	22704071	1:22704071	A	G	713	-1.19219	0.612372	0.0401874
1	22740019	1:22740019	C	T	713	0.517741	0.131176	6.96049e-05
1	22741902	1:22741902	A	G	713	-0.24981	0.127185	0.0487338
1	22742268	1:22742268	G	A	713	0.394295	0.154009	0.010073
1	22778240	1:22778240	T	G	713	-0.286078	0.13551	0.0342184
1	22781251	1:22781251	T	C	713	1.22005	0.379267	0.000904586
1	22849320	1:22849320	A	G	713	-0.888842	0.415811	0.024896
1	22893964	1:22893964	A	G	713	0.254965	0.130256	0.049697
1	22957737	1:22957737	A	G	713	-0.879958	0.309625	0.00355541
1	22967628	1:22967628	T	G	713	-0.302807	0.149831	0.0427159
1	23060112	1:23060112	A	G	713	-1.55178	0.796018	0.0297817
1	23158609	1:23158609	C	T	713	-1.57946	0.667709	0.00791225
1	23353011	1:23353011	C	T	713	0.743693	0.334585	0.0234736
1	23382471	1:23382471	A	G	713	-0.473354	0.166135	0.00419875
1	23478893	1:23478893	T	C	713	-1.29488	0.442504	0.00211043
1	23495012	1:23495012	T	C	713	1.30862	0.572232	0.014032
1	23540460	1:23540460	A	G	713	-0.300202	0.12756	0.0181685
1	23623657	1:23623657	G	A	713	0.504773	0.213372	0.0170632
1	23643640	1:23643640	T	C	713	0.314604	0.14995	0.0351229
1	23655025	1:23655025	T	C	713	1.5337	0.712327	0.0205423
1	23656329	1:23656329	A	G	713	1.2827	0.514797	0.00794639
1	23656685	1:23656685	G	A	713	-1.38584	0.563454	0.00710248
1	23659682	1:23659682	G	A	713	1.31099	0.668733	0.0296183
1	23666730	1:23666730	C	A	713	0.624432	0.322576	0.0474384
1	23667424	1:23667424	C	T	713	-1.11189	0.550183	0.0331169
1	23849300	1:23849300	A	C	713	-0.707119	0.328005	0.0286873
1	23879542	1:23879542	G	A	713	-0.297456	0.12713	0.018678
1	23917910	1:23917910	C	T	713	-0.69548	0.311916	0.0236875
1	23944512	1:23944512	T	C	713	0.966219	0.384862	0.00966207
1	23974505	1:23974505	C	T	713	1.44996	0.776132	0.041733
1	24000250	1:24000250	A	G	713	1.13904	0.540473	0.0306606
1	24121453	1:24121453	A	G	713	-0.381073	0.196228	0.0497645
1	24143557	1:24143557	T	G	713	-0.793968	0.381302	0.0308717
1	24172692	1:24172692	A	G	713	-1.1726	0.561532	0.0268992
1	24218157	1:24218157	C	T	713	-0.287778	0.146496	0.0487832
1	24253679	1:24253679	A	G	713	1.05653	0.505408	0.0301516
1	24280929	1:24280929	T	C	713	-0.395631	0.156409	0.0110777
1	24290049	1:24290049	T	C	713	0.712673	0.310152	0.0181953
1	24315269	1:24315269	G	A	713	0.36124	0.12668	0.00417725
1	24345529	1:24345529	A	G	713	1.52862	0.848227	0.0426049
1	24372335	1:24372335	T	C	713	-1.48701	0.591282	0.00728853
1	24395426	1:24395426	T	C	713	-0.713173	0.276625	0.00848516
1	24446519	1:24446519	G	A	713	-0.424821	0.218985	0.0496958
1	24463472	1:24463472	A	G	713	-0.825042	0.347481	0.0132337
1	24473302	1:24473302	T	C	713	0.359919	0.183359	0.0478245
1	24564068	1:24564068	C	T	713	-0.524592	0.201492	0.00886911
1	24573408	1:24573408	T	C	713	0.442315	0.220947	0.0438965
1	24574858	1:24574858	C	T	713	-0.848983	0.412609	0.0362944
1	24582292	1:24582292	C	T	713	-0.255802	0.128027	0.0451274
1	24586596	1:24586596	G	A	713	-0.695099	0.318398	0.0257816
1	24689854	1:24689854	A	G	713	-1.55701	0.691077	0.0144305
1	24856862	1:24856862	A	G	713	0.453375	0.230056	0.0469916
1	24887051	1:24887051	A	G	713	-0.598916	0.252844	0.0160048
1	24894544	1:24894544	A	G	713	1.26997	0.70094	0.0488686
1	24897920	1:24897920	G	A	713	-0.267862	0.136032	0.0485199
1	24902804	1:24902804	T	C	713	-1.58341	0.939057	0.0439107
1	24911549	1:24911549	A	G	713	1.11148	0.40272	0.00374068
1	24917063	1:24917063	T	C	713	-0.529241	0.220703	0.0158687
1	24926232	1:24926232	G	A	713	-1.19898	0.513795	0.0124094
1	24940075	1:24940075	A	G	713	0.952801	0.492716	0.0397237
1	24970693	1:24970693	A	G	713	0.271485	0.125192	0.0295897
1	24981825	1:24981825	C	A	713	-1.17065	0.441463	0.00595374
1	24983540	1:24983540	T	C	713	-1.24194	0.555948	0.0171554
1	24988403	1:24988403	C	T	713	-0.299307	0.142757	0.0353094
1	25019463	1:25019463	G	A	713	-0.345461	0.145897	0.0172318
1	25032095	1:25032095	T	C	713	-1.31842	0.678535	0.0415671
1	25043608	1:25043608	A	G	713	0.498926	0.198606	0.0112223
1	25055056	1:25055056	A	G	713	-1.3589	0.658439	0.0263451
1	25074401	1:25074401	C	T	713	-1.18185	0.486886	0.0102021
1	25134587	1:25134587	C	T	713	0.373001	0.152252	0.0135319
1	25157774	1:25157774	C	T	713	-0.932211	0.483672	0.0450049
1	25162411	1:25162411	A	G	713	-1.48775	0.563518	0.00427327
1	25456965	1:25456965	A	G	713	-0.66729	0.271391	0.0111488
1	25571303	1:25571303	G	A	713	0.981081	0.415384	0.0149479
1	25576089	1:25576089	G	A	713	-0.349225	0.131371	0.00751709
1	25577034	1:25577034	T	C	713	-0.87863	0.425486	0.0319176
1	25631986	1:25631986	T	G	713	-2.23269	0.90751	0.00217145
1	25677265	1:25677265	G	A	713	-0.615183	0.205585	0.00236837
1	25700293	1:25700293	T	C	713	1.96911	0.838107	0.00635916
1	25730973	1:25730973	G	A	713	-0.892162	0.316932	0.00319948
1	25783807	1:25783807	A	G	713	0.704714	0.347437	0.0379708
1	25789053	1:25789053	T	C	713	0.606595	0.313389	0.0486956
1	25878717	1:25878717	A	G	713	0.355224	0.136258	0.0086892
1	25922779	1:25922779	G	A	713	-0.574178	0.248	0.0181861
1	26065945	1:26065945	T	C	713	0.743232	0.382047	0.0488866
1	26177927	1:26177927	A	G	713	0.468907	0.205137	0.020505
1	26192690	1:26192690	A	G	713	0.450793	0.195729	0.0194156
1	26234749	1:26234749	A	G	713	1.13607	0.526867	0.0189291
1	26242032	1:26242032	A	G	713	-1.20934	0.552578	0.0274019
1	26357279	1:26357279	A	G	713	-0.306487	0.13217	0.0197697
1	26357753	1:26357753	A	G	713	0.622087	0.316626	0.0440575
1	26372773	1:26372773	T	C	713	-0.760825	0.345852	0.0244135
1	26417970	1:26417970	G	T	713	-0.650407	0.306307	0.0319279
1	26546149	1:26546149	A	G	713	0.96123	0.452759	0.0241063
1	26547768	1:26547768	A	C	713	-1.11097	0.577345	0.0470479
1	26569311	1:26569311	G	A	713	-0.298321	0.131108	0.0223193
1	26574610	1:26574610	T	C	713	-1.55955	0.495232	0.000632732
1	26578169	1:26578169	A	G	713	0.351837	0.131669	0.0072061
1	26578745	1:26578745	G	A	713	0.785465	0.389054	0.0351382
1	26832938	1:26832938	T	C	713	0.298697	0.148036	0.0421172
1	27063607	1:27063607	C	T	713	-1.13238	0.560655	0.0344112
1	27078731	1:27078731	A	G	713	0.781691	0.243107	0.00108198
1	27121485	1:27121485	T	C	713	-1.03152	0.472242	0.0242527
1	27328986	1:27328986	G	A	713	0.309681	0.146955	0.0343163
1	27339743	1:27339743	G	A	713	1.25605	0.49482	0.00814404
1	27344658	1:27344658	C	T	713	-1.26854	0.704555	0.0353924
1	27362142	1:27362142	A	G	713	0.417721	0.153474	0.00609902
1	27385636	1:27385636	A	G	713	-1.22455	0.607161	0.0358509
1	27435792	1:27435792	T	G	713	-0.966795	0.384906	0.00920026
1	27448588	1:27448588	T	C	713	1.2967	0.606353	0.0201553
1	27557886	1:27557886	T	C	713	-0.506728	0.183287	0.00530005
1	27607805	1:27607805	A	G	713	-1.38203	0.719531	0.0438611
1	27633743	1:27633743	G	A	713	-0.317088	0.148999	0.0328382
1	27653372	1:27653372	T	C	713	-1.09327	0.551624	0.0406855
1	27697089	1:27697089	C	T	713	-0.555395	0.194405	0.00380505
1	27730256	1:27730256	A	G	713	1.01438	0.521089	0.040268
1	27736828	1:27736828	A	G	713	-1.03232	0.466581	0.0201985
1	27760444	1:27760444	C	A	713	0.597722	0.298598	0.0424923
1	27815716	1:27815716	A	G	713	-0.794196	0.387878	0.0381883
1	27910096	1:27910096	G	A	713	-1.15325	0.546559	0.025934
1	27913233	1:27913233	A	G	713	-1.41346	0.70227	0.0273514
1	27967758	1:27967758	T	C	713	-0.667209	0.320699	0.0309935
1	28040858	1:28040858	T	G	713	1.18219	0.639622	0.0496387
1	28081530	1:28081530	A	C	713	1.61579	0.633488	0.00374645
1	28093873	1:28093873	G	A	713	-0.353343	0.170425	0.0382701
1	28223868	1:28223868	A	G	713	-1.12187	0.365423	0.00145895
1	28300752	1:28300752	A	C	713	-1.17815	0.4727	0.00790387
1	28497955	1:28497955	T	C	713	0.844482	0.339206	0.0112816
1	28508074	1:28508074	A	G	713	-0.692351	0.27517	0.00998964
1	28569363	1:28569363	T	C	713	-0.681867	0.326716	0.0340502
1	28591731	1:28591731	A	C	713	-1.25782	0.603075	0.032649
1	28614821	1:28614821	A	G	713	-1.56377	0.423239	6.46324e-05
1	28638346	1:28638346	T	C	713	1.15971	0.592571	0.0299233
1	28666286	1:28666286	A	G	713	-0.290169	0.131154	0.0264314
1	28789246	1:28789246	A	G	713	0.619758	0.31868	0.0469678
1	28801521	1:28801521	A	G	713	1.14962	0.619076	0.0480751
1	28837642	1:28837642	G	A	713	-0.933654	0.368604	0.0091641
1	28852676	1:28852676	G	A	713	0.935206	0.476995	0.0411879
1	28948688	1:28948688	T	C	713	-1.05033	0.561643	0.0418851
1	29088110	1:29088110	A	G	713	0.858223	0.436385	0.0421687
1	29092889	1:29092889	C	T	713	-0.863329	0.396459	0.0233954
1	29252261	1:29252261	C	T	713	-1.17119	0.619641	0.0380654
1	29255425	1:29255425	A	G	713	0.482958	0.220856	0.0265302
1	29278146	1:29278146	T	C	713	0.620897	0.286582	0.0279171
1	29284325	1:29284325	C	T	713	-1.36587	0.482362	0.00142541
1	29359824	1:29359824	A	C	713	-1.06989	0.47622	0.0181184
1	29369341	1:29369341	A	G	713	-1.36016	0.749977	0.0437814
1	29373628	1:29373628	C	T	713	0.437607	0.128109	0.000569771
1	29373767	1:29373767	G	T	713	-0.91203	0.42757	0.025787
1	29409875	1:29409875	G	A	713	1.1142	0.552277	0.0349969
1	29421536	1:29421536	T	C	713	-0.616475	0.205667	0.00227824
1	29448099	1:29448099	G	A	713	1.56309	0.574051	0.00368663
1	29454745	1:29454745	T	C	713	1.49752	0.443715	0.000289854
1	29461489	1:29461489	A	G	713	-0.435575	0.188038	0.0196526
1	29465791	1:29465791	A	G	713	0.440258	0.149423	0.0030693
1	29499743	1:29499743	C	A	713	-1.53213	0.653018	0.0104026
1	29509311	1:29509311	A	G	713	1.13746	0.496874	0.0160768
1	29514697	1:29514697	T	C	713	1.109	0.516082	0.0259024
1	29528951	1:29528951	T	C	713	-1.25304	0.573528	0.0189946
1	29550808	1:29550808	A	G	713	-1.21469	0.640632	0.045091
1	29557111	1:29557111	C	T	713	0.490249	0.219725	0.023711
1	29573707	1:29573707	A	G	713	-1.43722	0.618536	0.00703072
1	29590350	1:29590350	T	C	713	0.571281	0.189349	0.002377
1	29604465	1:29604465	T	C	713	-0.306211	0.151196	0.0424111
1	29702745	1:29702745	T	C	713	-0.574159	0.201519	0.00391787
1	29706009	1:29706009	T	C	713	1.07614	0.409982	0.00606694
1	29722064	1:29722064	G	A	713	-0.899871	0.446895	0.038832
1	29726823	1:29726823	G	A	713	-0.909995	0.367983	0.0107132
1	29742106	1:29742106	T	C	713	-0.683401	0.273142	0.0112347
1	29753105	1:29753105	T	C	713	0.785447	0.396559	0.0383416
1	29807625	1:29807625	G	A	713	-0.252842	0.126232	0.044793
1	29826051	1:29826051	T	C	713	1.21267	0.440342	0.00429438
1	29861051	1:29861051	T	C	713	1.31791	0.70038	0.039094
1	29862762	1:29862762	T	C	713	-1.46457	0.662896	0.0134113
1	29893431	1:29893431	A	G	713	0.345665	0.129793	0.00731611
1	29897326	1:29897326	A	G	713	-0.884382	0.417951	0.027621
1	29899043	1:29899043	G	A	713	-1.22697	0.592059	0.0320812
1	29906392	1:29906392	A	G	713	-1.14714	0.497113	0.0202806
1	29910561	1:29910561	A	G	713	0.469492	0.193116	0.0133835
1	29932523	1:29932523	C	A	713	-0.300072	0.132906	0.0238996
1	29988569	1:29988569	T	C	713	0.30901	0.125723	0.0136688
1	30079112	1:30079112	C	T	713	-2.06806	0.699095	0.000707848
1	30094749	1:30094749	A	G	713	-0.323011	0.131513	0.013736
1	30099060	1:30099060	C	A	713	-1.44885	0.530053	0.00293704
1	30134765	1:30134765	G	A	713	-0.93963	0.492305	0.0441825
1	30153268	1:30153268	T	C	713	1.54756	0.557712	0.00238946
1	30187873	1:30187873	C	T	713	-0.433101	0.219665	0.0464708
1	30266195	1:30266195	A	G	713	1.01025	0.462523	0.0233894
1	30315868	1:30315868	T	C	713	0.798661	0.361895	0.0247891
1	30334462	1:30334462	A	G	713	-1.22096	0.624087	0.0363078
1	30366422	1:30366422	C	T	713	1.22871	0.50286	0.00995153
1	30390282	1:30390282	A	G	713	-1.64763	0.744222	0.00941434
1	30411572	1:30411572	A	G	713	0.838651	0.399197	0.031484
1	30455569	1:30455569	C	T	713	1.33246	0.590568	0.0137645
1	30468090	1:30468090	G	T	713	-1.21326	0.388372	0.0011513
1	30481117	1:30481117	A	G	713	0.682265	0.32403	0.0321862
1	30485873	1:30485873	T	C	713	-0.538032	0.203178	0.00764909
1	30510257	1:30510257	C	T	713	1.08112	0.351256	0.0016659
1	30514304	1:30514304	T	C	713	-0.296851	0.132993	0.0252244
1	30529487	1:30529487	G	A	713	-1.27865	0.648723	0.0345637
1	30643167	1:30643167	T	C	713	0.270041	0.125465	0.0306909
1	30645115	1:30645115	T	C	713	-0.663742	0.242094	0.00552154
1	30735580	1:30735580	T	C	713	-0.822749	0.436212	0.0456131
1	30735936	1:30735936	T	C	713	-1.47111	0.79207	0.0336171
1	30737943	1:30737943	T	C	713	-0.914344	0.388184	0.0156935
1	30780935	1:30780935	A	G	713	-0.876503	0.331655	0.00678219
1	30787151	1:30787151	T	C	713	-1.17078	0.499635	0.0161685
1	30791376	1:30791376	A	G	713	0.762643	0.340957	0.0215904
1	30837849	1:30837849	T	C	713	1.1175	0.538215	0.0229393
1	30850701	1:30850701	A	G	713	-0.278714	0.138905	0.0439997
1	30853680	1:30853680	G	A	713	0.408983	0.159292	0.00988508
1	30871999	1:30871999	T	C	713	-1.67729	0.686828	0.00832434
1	30888273	1:30888273	A	C	713	-2.41578	0.800262	0.000343795
1	30894897	1:30894897	A	G	713	0.881798	0.283204	0.00146487
1	30913116	1:30913116	T	C	713	-0.676747	0.343858	0.045504
1	30916071	1:30916071	A	G	713	0.877516	0.44309	0.0487371
1	30984609	1:30984609	C	T	713	1.34211	0.633718	0.0293894
1	31061534	1:31061534	C	T	713	-0.273963	0.133716	0.0399439
1	31099689	1:31099689	A	G	713	0.648251	0.335789	0.0490772
1	31131264	1:31131264	C	T	713	1.63754	0.664797	0.00907361
1	31166273	1:31166273	G	A	713	-0.366271	0.138647	0.00789351
1	31192331	1:31192331	G	A	713	-2.14899	0.803251	0.00230293
1	31256020	1:31256020	T	C	713	-0.838053	0.419072	0.0344294
1	31399734	1:31399734	G	T	713	0.459019	0.149381	0.00201053
1	31410942	1:31410942	G	A	713	0.551162	0.22521	0.0135077
1	31559154	1:31559154	T	C	713	-0.683049	0.298189	0.0190314
1	31590909	1:31590909	A	G	713	0.261981	0.129831	0.0433122
1	31623027	1:31623027	C	T	713	-1.23412	0.576751	0.0241096
1	31680464	1:31680464	G	A	713	0.70292	0.270843	0.00797848
1	31694214	1:31694214	A	G	713	0.864021	0.441149	0.040879
1	31711766	1:31711766	A	G	713	0.890712	0.423768	0.0254244
1	31804109	1:31804109	T	C	713	1.14423	0.544332	0.0232622
1	31921891	1:31921891	T	G	713	-0.293284	0.143792	0.0408564
1	31953443	1:31953443	T	C	713	0.677857	0.26626	0.00980054
1	31991950	1:31991950	A	C	713	1.13112	0.547404	0.0307673
1	32240038	1:32240038	C	A	713	-0.466538	0.160819	0.00343993
1	32244110	1:32244110	T	C	713	2.59519	0.883177	0.000964984
1	32262040	1:32262040	T	C	713	0.919689	0.358431	0.00750706
1	32290392	1:32290392	C	T	713	0.350558	0.167212	0.0355492
1	32448237	1:32448237	A	G	713	1.25288	0.634053	0.0272684
1	32488317	1:32488317	G	T	713	0.75969	0.317461	0.0155482
1	32725740	1:32725740	T	C	713	-0.508238	0.192563	0.00806343
1	32866071	1:32866071	C	T	713	-0.803358	0.317199	0.00871064
1	32875997	1:32875997	G	T	713	0.504386	0.251671	0.0432763
1	32890296	1:32890296	A	G	713	1.09128	0.430006	0.00745058
1	32924634	1:32924634	G	A	713	1.01114	0.468542	0.0229721
1	33026908	1:33026908	T	C	713	0.445761	0.191712	0.0191139
1	33137235	1:33137235	T	G	713	0.763656	0.296176	0.00869421
1	33146386	1:33146386	A	G	713	-1.43048	0.774609	0.0352501
1	33180544	1:33180544	G	A	713	0.281889	0.143211	0.0475488
1	33226503	1:33226503	C	T	713	1.50637	0.374458	1.69481e-05
1	33251820	1:33251820	T	C	713	0.65088	0.30398	0.0284145
1	33284112	1:33284112	T	C	713	0.560048	0.233955	0.0151768
1	33340833	1:33340833	A	G	713	0.779367	0.397857	0.0484262
1	33436150	1:33436150	T	C	713	-0.420728	0.181137	0.0194062
1	33450689	1:33450689	T	C	713	0.782918	0.324768	0.0132938
1	33470444	1:33470444	G	A	713	1.73921	0.64153	0.00302733
1	33473244	1:33473244	G	A	713	0.792944	0.330123	0.0145865
1	33503462	1:33503462	G	A	713	-0.657185	0.33632	0.0443221
1	33511133	1:33511133	A	G	713	-0.473972	0.166476	0.00403766
1	33561073	1:33561073	C	T	713	0.469689	0.184858	0.00997218
1	33569881	1:33569881	A	G	713	-0.590983	0.201945	0.00334619
1	33596298	1:33596298	T	C	713	-0.438303	0.173083	0.0108835
1	33690078	1:33690078	A	G	713	1.28207	0.652208	0.0396278
1	33749209	1:33749209	C	T	713	0.434434	0.209899	0.0367029
1	33756201	1:33756201	C	A	713	-1.02574	0.505126	0.0305246
1	33760640	1:33760640	C	A	713	-0.86835	0.378251	0.0190463
1	33769561	1:33769561	C	T	713	0.372127	0.168605	0.0262482
1	33785880	1:33785880	C	T	713	-0.397214	0.187314	0.0330096
1	33796748	1:33796748	T	C	713	0.386703	0.190882	0.0411936
1	33870664	1:33870664	A	C	713	0.980371	0.457098	0.0241719
1	33875394	1:33875394	T	C	713	-0.26952	0.131622	0.0397915
1	33881505	1:33881505	A	G	713	0.441991	0.17581	0.0111496
1	33888872	1:33888872	G	A	713	0.534354	0.260524	0.0373113
1	33895594	1:33895594	A	G	713	1.23808	0.640671	0.0392302
1	33934603	1:33934603	T	C	713	-1.3354	0.63766	0.0296353
1	33989482	1:33989482	G	A	713	-1.82937	0.769644	0.00994993
1	34037934	1:34037934	C	T	713	-0.706673	0.299667	0.0159904
1	34076205	1:34076205	C	A	713	-0.31912	0.130832	0.0143956
1	34175235	1:34175235	A	G	713	-0.739848	0.365885	0.0384087
1	34217521	1:34217521	A	G	713	1.46888	0.621209	0.0107738
1	34238801	1:34238801	G	T	713	0.747648	0.279612	0.0063263
1	34276004	1:34276004	A	G	713	0.417462	0.139796	0.00276834
1	34342714	1:34342714	C	T	713	0.3487	0.173351	0.0432982
1	34360340	1:34360340	A	G	713	-0.815186	0.312331	0.00804415
1	34369684	1:34369684	A	G	713	1.27658	0.559984	0.0141469
1	34429359	1:34429359	C	A	713	-0.359424	0.150987	0.0172711
1	34432731	1:34432731	T	C	713	0.536556	0.189638	0.00429606
1	34433879	1:34433879	T	G	713	0.810004	0.332937	0.0126142
1	34443641	1:34443641	T	C	713	0.763996	0.389608	0.0431142
1	34447312	1:34447312	C	T	713	0.514586	0.233217	0.0264948
1	34464812	1:34464812	G	A	713	-0.504801	0.175961	0.00379437
1	34472644	1:34472644	A	G	713	-1.57218	0.648987	0.00975035
1	34475099	1:34475099	T	C	713	-1.354	0.564732	0.0122817
1	34488255	1:34488255	G	T	713	-0.363515	0.129876	0.00487674
1	34496484	1:34496484	A	G	713	0.988051	0.466028	0.029255
1	34545032	1:34545032	T	C	713	-1.78422	0.64138	0.00201094
1	34590778	1:34590778	A	G	713	-1.16603	0.481695	0.0114649
1	34686342	1:34686342	T	C	713	1.15272	0.616777	0.0403265
1	34751759	1:34751759	A	C	713	0.601816	0.288801	0.0334942
1	34753910	1:34753910	T	C	713	-0.384523	0.138276	0.0051318
1	34762072	1:34762072	G	A	713	-0.423449	0.200248	0.0332193
1	34879926	1:34879926	A	G	713	0.988696	0.453163	0.0227767
1	34893868	1:34893868	T	C	713	-0.607957	0.293331	0.0366387
1	34903669	1:34903669	G	A	713	0.445233	0.218464	0.0379586
1	34909640	1:34909640	C	T	713	-0.375639	0.161133	0.0193299
1	34941751	1:34941751	T	C	713	1.45944	0.594549	0.00859864
1	34958444	1:34958444	C	T	713	-1.06311	0.512606	0.0312327
1	35035991	1:35035991	T	C	713	-0.891598	0.342743	0.00764698
1	35074934	1:35074934	T	C	713	0.687966	0.211111	0.00101876
1	35172530	1:35172530	A	G	713	-1.12096	0.392523	0.00271581
1	35189124	1:35189124	A	G	713	0.536154	0.271678	0.0464997
1	35226659	1:35226659	A	G	713	1.43883	0.813091	0.0474253
1	35257269	1:35257269	T	C	713	0.487088	0.22618	0.028829
1	35336748	1:35336748	A	G	713	-0.419329	0.199993	0.034748
1	35504388	1:35504388	G	A	713	-1.06549	0.364411	0.0022837
1	35511944	1:35511944	G	A	713	1.1279	0.555374	0.0302134
1	35535794	1:35535794	C	T	713	1.31086	0.491938	0.00488259
1	35619669	1:35619669	G	A	713	1.56514	0.791558	0.0246752
1	35756989	1:35756989	G	A	713	-1.23423	0.652748	0.0431678
1	35796377	1:35796377	A	G	713	1.66729	0.678039	0.00837471
1	35860595	1:35860595	C	T	713	0.484002	0.184664	0.00836392
1	36019171	1:36019171	C	T	713	-1.73891	0.610334	0.00160609
1	36169403	1:36169403	C	A	713	1.00143	0.498711	0.035501
1	36189240	1:36189240	A	G	713	-0.829453	0.370195	0.0228486
1	36210352	1:36210352	T	C	713	1.80921	0.812044	0.0181924
1	36467495	1:36467495	C	T	713	0.456159	0.167444	0.00601368
1	36471791	1:36471791	C	T	713	0.325146	0.142446	0.0222147
1	36504452	1:36504452	G	A	713	-1.4356	0.790915	0.040863
1	36509659	1:36509659	A	G	713	1.50605	0.680604	0.0118779
1	36519405	1:36519405	T	C	713	0.400968	0.204799	0.0492334
1	36528778	1:36528778	T	C	713	-0.394971	0.156023	0.01087
1	36591116	1:36591116	C	T	713	-0.991746	0.500152	0.0362243
1	36636908	1:36636908	A	C	713	-0.942196	0.403625	0.01554
1	36780530	1:36780530	A	G	713	1.23421	0.541117	0.0154291
1	36785666	1:36785666	A	C	713	-0.622445	0.317967	0.0473391
1	36833514	1:36833514	A	G	713	0.971763	0.487805	0.037894
1	36834532	1:36834532	C	T	713	-1.41226	0.717009	0.0335846
1	36859334	1:36859334	C	T	713	-0.280164	0.131436	0.0320893
1	36880509	1:36880509	G	A	713	-0.926445	0.479285	0.0476223
1	36929496	1:36929496	C	T	713	3.35977	1.35836	0.00172211
1	36929643	1:36929643	G	A	713	0.336805	0.162847	0.0371262
1	36939823	1:36939823	A	C	713	-1.28419	0.579999	0.0132206
1	36940823	1:36940823	C	T	713	-0.293863	0.143413	0.0392772
1	36961735	1:36961735	A	C	713	0.560001	0.281708	0.0437119
1	36973892	1:36973892	T	C	713	-0.821454	0.396528	0.0294924
1	36999694	1:36999694	T	C	713	-0.704691	0.319049	0.0244895
1	37022310	1:37022310	A	G	713	1.47649	0.71657	0.0240796
1	37028114	1:37028114	A	C	713	1.09475	0.458538	0.0104643
1	37113340	1:37113340	C	T	713	1.59855	0.851713	0.036675
1	37136367	1:37136367	A	G	713	0.49996	0.242142	0.0358748
1	37150020	1:37150020	C	T	713	-0.829757	0.383994	0.0263694
1	37158759	1:37158759	A	G	713	1.69966	0.801469	0.0150044
1	37163369	1:37163369	T	C	713	-1.22094	0.529071	0.0150283
1	37167232	1:37167232	A	G	713	1.13299	0.59958	0.0467186
1	37187146	1:37187146	A	G	713	-0.298622	0.127173	0.0183988
1	37187657	1:37187657	A	G	713	0.501534	0.217725	0.0201053
1	37233583	1:37233583	A	C	713	-0.552002	0.244518	0.0228129
1	37251618	1:37251618	C	T	713	0.846896	0.34528	0.0109507
1	37290411	1:37290411	G	T	713	0.831682	0.34826	0.0151771
1	37306798	1:37306798	A	G	713	-0.639004	0.240368	0.00690955
1	37310871	1:37310871	G	T	713	1.45958	0.612038	0.0113073
1	37315223	1:37315223	A	G	713	0.272836	0.125029	0.0286194
1	37350801	1:37350801	T	C	713	1.37092	0.545697	0.00903941
1	37463105	1:37463105	T	C	713	1.77372	0.930998	0.0320945
1	37549016	1:37549016	C	T	713	0.912742	0.428018	0.0279107
1	37626424	1:37626424	A	C	713	1.50112	0.616578	0.00754658
1	37636470	1:37636470	A	G	713	0.321279	0.158196	0.0414066
1	37641653	1:37641653	T	C	713	-1.10883	0.499429	0.020603
1	37645796	1:37645796	A	G	713	-0.569365	0.219906	0.00861033
1	37651470	1:37651470	T	C	713	0.340392	0.131184	0.00918692
1	37653661	1:37653661	A	G	713	-1.26754	0.604014	0.0247719
1	37654249	1:37654249	T	C	713	-1.11843	0.572339	0.0396105
1	37673039	1:37673039	G	A	713	-0.388615	0.14663	0.00786032
1	37732192	1:37732192	G	A	713	0.699044	0.249458	0.00431112
1	37764489	1:37764489	A	G	713	-1.32342	0.361644	0.00013659
1	37795061	1:37795061	T	C	713	0.357095	0.163026	0.0281456
1	37845937	1:37845937	A	G	713	-1.0283	0.459349	0.0212785
1	37989647	1:37989647	G	A	713	-0.448765	0.225867	0.0448849
1	37995781	1:37995781	A	G	713	1.28833	0.554069	0.0139447
1	38008248	1:38008248	A	G	713	0.266852	0.130481	0.0402281
1	38088241	1:38088241	T	C	713	-0.803484	0.34999	0.0203142
1	38151199	1:38151199	A	C	713	-0.347221	0.158361	0.0272559
1	38151894	1:38151894	A	C	713	1.1799	0.623376	0.0483337
1	38206025	1:38206025	A	G	713	0.401701	0.128998	0.00172958
1	38226782	1:38226782	C	T	713	1.46197	0.642147	0.0143585
1	38230544	1:38230544	T	G	713	-0.41464	0.196871	0.0334572
1	38246441	1:38246441	A	G	713	0.521243	0.194615	0.00705342
1	38249977	1:38249977	A	G	713	-1.53564	0.812115	0.0325342
1	38267250	1:38267250	G	A	713	1.31741	0.617513	0.0255135
1	38271101	1:38271101	A	C	713	-2.47984	0.790843	0.000219756
1	38301194	1:38301194	T	C	713	0.667703	0.27941	0.016468
1	38310490	1:38310490	C	T	713	-0.973016	0.469725	0.0301689
1	38329106	1:38329106	A	G	713	0.374446	0.127969	0.003211
1	38349097	1:38349097	C	A	713	0.651718	0.30017	0.025995
1	38370172	1:38370172	A	G	713	0.405144	0.168075	0.0151415
1	38381797	1:38381797	T	C	713	-0.540823	0.269442	0.0410724
1	38409922	1:38409922	G	A	713	1.01316	0.536115	0.0474985
1	38428370	1:38428370	C	T	713	0.405023	0.159288	0.0104047
1	38442944	1:38442944	A	G	713	-1.01814	0.496399	0.0352128
1	38445301	1:38445301	T	G	713	-1.20857	0.605618	0.0353134
1	38448323	1:38448323	G	A	713	1.2572	0.544126	0.015807
1	38483871	1:38483871	T	C	713	-0.723287	0.340609	0.0327077
1	38502089	1:38502089	C	T	713	0.265023	0.125701	0.0345573
1	38509654	1:38509654	T	C	713	0.925137	0.337751	0.0049673
1	38524305	1:38524305	T	C	713	-1.13658	0.477945	0.0117571
1	38538891	1:38538891	C	T	713	1.12379	0.479377	0.0151841
1	38575562	1:38575562	C	T	713	-0.264914	0.128565	0.0387427
1	38602763	1:38602763	A	G	713	-1.48377	0.618461	0.00794969
1	38604243	1:38604243	G	T	713	0.307437	0.133842	0.0209474
1	38611393	1:38611393	C	T	713	-0.330146	0.160977	0.039493
1	38662929	1:38662929	A	G	713	-0.336402	0.171065	0.0476398
1	38672119	1:38672119	G	A	713	1.20472	0.473022	0.00728216
1	38694870	1:38694870	T	C	713	-0.447785	0.165788	0.0063247
1	38696083	1:38696083	A	C	713	1.22713	0.376776	0.000661561
1	38719647	1:38719647	T	C	713	2.17163	0.926993	0.00300061
1	38741292	1:38741292	A	G	713	0.891939	0.427132	0.0316942
1	38808453	1:38808453	C	T	713	-0.294664	0.147802	0.0452845
1	38827789	1:38827789	T	C	713	-1.40347	0.629628	0.0194393
1	38853753	1:38853753	G	A	713	-1.29232	0.527865	0.00923741
1	38921716	1:38921716	A	G	713	0.943955	0.406907	0.0190884
1	38965040	1:38965040	C	T	713	-0.31608	0.149938	0.0345382
1	39096958	1:39096958	T	C	713	-0.503481	0.235515	0.0310821
1	39111321	1:39111321	A	G	713	0.942061	0.460515	0.0353102
1	39165625	1:39165625	A	G	713	-0.295821	0.139122	0.0330043
1	39211803	1:39211803	T	C	713	-1.58589	0.623532	0.00473097
1	39222215	1:39222215	T	C	713	1.30738	0.700962	0.0402495
1	39232277	1:39232277	A	G	713	1.06804	0.510408	0.0295509
1	39313938	1:39313938	C	T	713	0.594392	0.249709	0.0156693
1	39386795	1:39386795	A	G	713	1.2209	0.404329	0.00167086
1	39474758	1:39474758	A	G	713	1.5897	0.561629	0.00143622
1	39483335	1:39483335	G	T	713	1.14868	0.504204	0.017572
1	39594106	1:39594106	G	A	713	-0.32907	0.124937	0.00825962
1	39600614	1:39600614	G	A	713	-0.519577	0.210026	0.0125207
1	39603777	1:39603777	A	G	713	-1.88552	0.779165	0.00558097
1	39618542	1:39618542	T	C	713	1.00244	0.488092	0.0341909
1	39662159	1:39662159	T	C	713	1.42412	0.620835	0.0128401
1	39666409	1:39666409	A	G	713	-0.886423	0.440533	0.0382226
1	39685706	1:39685706	C	T	713	-0.659299	0.290692	0.0213354
1	39724430	1:39724430	A	G	713	0.45649	0.235173	0.0481781
1	39732795	1:39732795	T	G	713	-0.681648	0.293914	0.0200194
1	39757468	1:39757468	G	T	713	0.416131	0.176131	0.0174149
1	39782627	1:39782627	A	C	713	-0.645851	0.25469	0.0102174
1	39814044	1:39814044	T	C	713	-1.24025	0.494293	0.00793433
1	39839599	1:39839599	C	T	713	1.03688	0.532065	0.040255
1	39952401	1:39952401	T	C	713	1.09646	0.542145	0.0370851
1	40013762	1:40013762	G	A	713	-0.361911	0.165753	0.0292139
1	40251627	1:40251627	T	C	713	-1.44948	0.575508	0.00634892
1	40288685	1:40288685	C	A	713	-1.316	0.645045	0.035233
1	40302519	1:40302519	A	G	713	0.9274	0.481264	0.0429279
1	40410829	1:40410829	T	G	713	-0.439761	0.225558	0.0480917
1	40434261	1:40434261	A	G	713	1.22636	0.602258	0.0314442
1	40447379	1:40447379	C	A	713	-0.943888	0.41292	0.0186741
1	40528327	1:40528327	T	C	713	-1.15533	0.553405	0.0272113
1	40589863	1:40589863	G	A	713	0.769342	0.336665	0.018985
1	40599212	1:40599212	T	C	713	-0.300133	0.140296	0.0320428
1	40689814	1:40689814	T	C	713	0.38436	0.134379	0.00402977
1	40773090	1:40773090	A	G	713	-1.29096	0.664831	0.0359228
1	40803373	1:40803373	T	C	713	-1.35581	0.651058	0.025613
1	40811222	1:40811222	A	G	713	1.03793	0.400983	0.00694017
1	40820951	1:40820951	A	G	713	0.326383	0.130063	0.0118163
1	40841636	1:40841636	C	T	713	0.638263	0.32471	0.0479082
1	40843046	1:40843046	G	A	713	0.424263	0.197662	0.0302364
1	40895659	1:40895659	A	G	713	0.632757	0.31234	0.0394276
1	40912997	1:40912997	T	C	713	-1.02729	0.48753	0.0238737
1	40920034	1:40920034	A	G	713	-1.00789	0.499499	0.037151
1	40956832	1:40956832	A	C	713	0.410184	0.14379	0.00413809
1	40998200	1:40998200	T	C	713	0.480587	0.228428	0.033861
1	41000427	1:41000427	G	A	713	1.54217	0.633532	0.00627755
1	41021737	1:41021737	A	G	713	-1.30111	0.495052	0.00619199
1	41043383	1:41043383	T	C	713	-0.927875	0.449907	0.0319198
1	41063637	1:41063637	G	A	713	1.41205	0.53455	0.00520295
1	41078607	1:41078607	G	T	713	-0.288362	0.135754	0.0332683
1	41278057	1:41278057	T	G	713	-0.857651	0.416941	0.0373439
1	41367124	1:41367124	C	T	713	-0.936083	0.502682	0.0476102
1	41385934	1:41385934	C	T	713	1.08257	0.470804	0.016208
1	41409017	1:41409017	T	C	713	0.739806	0.26483	0.00474067
1	41431586	1:41431586	T	C	713	0.967471	0.514854	0.0499689
1	41434607	1:41434607	T	C	713	-1.27485	0.6105	0.0229118
1	41489396	1:41489396	T	C	713	1.28032	0.518128	0.00977462
1	41629446	1:41629446	T	C	713	1.22437	0.541386	0.0175967
1	41637195	1:41637195	T	C	713	1.43368	0.666458	0.0189902
1	41654685	1:41654685	G	A	713	-0.934156	0.33768	0.00415623
1	41656446	1:41656446	A	G	713	-0.349422	0.129079	0.00646487
1	41671640	1:41671640	G	T	713	-1.05023	0.426545	0.0111391
1	41740802	1:41740802	T	C	713	0.419223	0.194764	0.0301217
1	41755001	1:41755001	T	C	713	1.46157	0.629823	0.0123135
1	41778207	1:41778207	T	C	713	-0.44255	0.133903	0.000861371
1	41779788	1:41779788	G	T	713	0.408647	0.195822	0.0348594
1	41789250	1:41789250	T	G	713	-1.09329	0.519753	0.0277549
1	41795048	1:41795048	T	C	713	-1.04201	0.530141	0.0359426
1	41830474	1:41830474	G	A	713	0.299914	0.129873	0.0203367
1	41834238	1:41834238	C	T	713	-0.338529	0.162577	0.0358006
1	41896221	1:41896221	G	A	713	0.546026	0.239487	0.0204517
1	41905945	1:41905945	T	C	713	-0.595123	0.294019	0.0411491
1	41994889	1:41994889	A	C	713	0.786391	0.395853	0.0431062
1	42112858	1:42112858	T	G	713	-1.11173	0.537417	0.0321447
1	42139299	1:42139299	A	G	713	1.12261	0.510102	0.0216656
1	42140989	1:42140989	G	A	713	-1.24412	0.672739	0.0419653
1	42177021	1:42177021	G	A	713	-1.55631	0.558548	0.00256047
1	42262248	1:42262248	T	C	713	0.950154	0.465263	0.0374317
1	42275292	1:42275292	C	T	713	-1.10765	0.592945	0.043015
1	42286657	1:42286657	A	G	713	0.881853	0.415685	0.0289648
1	42357831	1:42357831	G	A	713	0.833723	0.38826	0.0285049
1	42453701	1:42453701	T	C	713	-1.39987	0.64095	0.0199407
1	42489521	1:42489521	C	T	713	1.13721	0.610873	0.04469
1	42567952	1:42567952	A	G	713	0.451451	0.129198	0.000424063
1	42587594	1:42587594	A	G	713	2.30059	0.950941	0.00227871
1	42622347	1:42622347	G	A	713	1.05267	0.530843	0.0393342
1	42641953	1:42641953	C	T	713	0.563854	0.1911	0.00275391
1	42690871	1:42690871	A	C	713	0.28083	0.123117	0.0219816
1	42718828	1:42718828	A	G	713	-0.479093	0.232976	0.0384973
1	42804104	1:42804104	T	C	713	1.03006	0.533961	0.0422309
1	42889949	1:42889949	T	C	713	1.86216	0.783019	0.00592339
1	42890540	1:42890540	A	C	713	-0.594817	0.22554	0.00737649
1	42892505	1:42892505	C	T	713	-1.22187	0.638845	0.041889
1	43012079	1:43012079	A	G	713	-1.14652	0.608477	0.0485009
1	43124738	1:43124738	G	T	713	-0.952365	0.33069	0.00302037
1	43386126	1:43386126	A	G	713	-0.90432	0.358137	0.00921383
1	43414117	1:43414117	G	A	713	1.33979	0.645603	0.0252633
1	43434514	1:43434514	T	C	713	1.28058	0.557678	0.0133524
1	43482163	1:43482163	A	G	713	-1.39785	0.640104	0.0176384
1	43500850	1:43500850	T	G	713	-0.648986	0.287961	0.022272
1	43509567	1:43509567	A	G	713	-0.412133	0.128605	0.00126754
1	43640118	1:43640118	T	C	713	-0.436715	0.172997	0.0111273
1	43650795	1:43650795	A	G	713	0.335145	0.143025	0.0185862
1	43667073	1:43667073	T	C	713	-1.18659	0.615033	0.0410469
1	43719555	1:43719555	T	C	713	-1.04069	0.387398	0.00538543
1	43780106	1:43780106	C	T	713	-0.264924	0.132562	0.0452356
1	44077111	1:44077111	A	G	713	-0.258449	0.131455	0.0485434
1	44099522	1:44099522	A	G	713	0.469571	0.23977	0.0482503
1	44115294	1:44115294	C	A	713	0.44714	0.162098	0.0053744
1	44115384	1:44115384	A	G	713	1.05566	0.409437	0.00618643
1	44138073	1:44138073	T	G	713	0.285088	0.134758	0.0335066
1	44150773	1:44150773	A	C	713	-1.41173	0.55053	0.00627986
1	44189443	1:44189443	A	G	713	-1.9536	0.662445	0.000843179
1	44195105	1:44195105	T	C	713	1.81825	0.716434	0.00539275
1	44264264	1:44264264	C	T	713	-1.08876	0.412427	0.00650294
1	44269951	1:44269951	A	G	713	1.63393	0.614243	0.00366412
1	44291355	1:44291355	T	C	713	-0.620725	0.316637	0.0484808
1	44390873	1:44390873	G	A	713	-0.491817	0.247157	0.044157
1	44392497	1:44392497	C	T	713	0.299791	0.145754	0.0387062
1	44412959	1:44412959	T	C	713	1.38417	0.71405	0.0329314
1	44417747	1:44417747	T	G	713	-0.285849	0.13454	0.033279
1	44425984	1:44425984	C	T	713	-0.622823	0.26704	0.0187819
1	44431624	1:44431624	G	A	713	1.1271	0.485501	0.0149118
1	44434180	1:44434180	A	G	713	-0.942391	0.344598	0.00418456
1	44438323	1:44438323	G	A	713	-0.998993	0.416485	0.0117168
1	44449151	1:44449151	T	G	713	1.51255	0.579916	0.00382446
1	44452273	1:44452273	T	G	713	0.294068	0.14231	0.0381364
1	44457951	1:44457951	A	G	713	0.986943	0.485782	0.0342894
1	44480945	1:44480945	A	G	713	-1.50261	0.545104	0.00373697
1	44485070	1:44485070	G	A	713	-0.638963	0.28659	0.0236184
1	44513230	1:44513230	A	G	713	1.26094	0.582636	0.0221789
1	44561738	1:44561738	A	G	713	1.34741	0.65573	0.0270944
1	44572074	1:44572074	C	A	713	1.2889	0.6783	0.0389996
1	44599045	1:44599045	C	T	713	0.983035	0.521929	0.0492312
1	44669380	1:44669380	C	T	713	-1.24897	0.51422	0.00968635
1	44700711	1:44700711	C	T	713	-0.387304	0.190237	0.0410393
1	44710083	1:44710083	A	G	713	1.72547	0.722924	0.00367181
1	44892320	1:44892320	T	C	713	-0.394553	0.177244	0.0255217
1	45170904	1:45170904	C	A	713	-0.359789	0.175591	0.0394385
1	45243144	1:45243144	A	G	713	0.450919	0.174159	0.00892997
1	45345193	1:45345193	A	G	713	-0.673802	0.326914	0.0372889
1	45453787	1:45453787	G	A	713	0.790321	0.403617	0.0439208
1	45496465	1:45496465	C	T	713	0.648899	0.323678	0.0404855
1	45565024	1:45565024	A	G	713	-1.42267	0.713132	0.0318273
1	45794657	1:45794657	A	C	713	1.0998	0.395861	0.00378948
1	46073850	1:46073850	A	G	713	0.949121	0.398614	0.0136877
1	46250651	1:46250651	G	T	713	0.491072	0.251191	0.0474428
1	46322060	1:46322060	T	C	713	1.16101	0.584303	0.0347184
1	46446490	1:46446490	T	C	713	0.294293	0.133228	0.0262017
1	46456197	1:46456197	T	C	713	-1.02123	0.388253	0.00685378
1	46489915	1:46489915	G	A	713	-0.316367	0.15176	0.036256
1	46489921	1:46489921	A	G	713	-0.836848	0.391501	0.0273187
1	46517071	1:46517071	A	G	713	-0.540385	0.254645	0.0325732
1	46534086	1:46534086	T	C	713	0.285183	0.121987	0.0190191
1	46539661	1:46539661	C	T	713	1.44675	0.700442	0.0239056
1	46638214	1:46638214	A	C	713	-0.461195	0.182153	0.0102868
1	46792572	1:46792572	C	T	713	0.511801	0.192645	0.00742951
1	46860390	1:46860390	G	A	713	0.681599	0.306879	0.0212388
1	46904334	1:46904334	A	G	713	-0.871	0.363962	0.0143057
1	46919921	1:46919921	A	G	713	-1.26721	0.552479	0.0144724
1	46940420	1:46940420	C	T	713	-1.19523	0.616788	0.0421988
1	46958133	1:46958133	C	T	713	1.92134	0.695802	0.00168178
1	47251573	1:47251573	T	C	713	1.18417	0.608388	0.0412544
1	47334425	1:47334425	T	C	713	0.911628	0.433371	0.0308404
1	47564678	1:47564678	A	G	713	0.638197	0.303437	0.0336364
1	47582388	1:47582388	G	A	713	0.272569	0.125322	0.02922
1	47595621	1:47595621	T	C	713	-1.23827	0.461226	0.00374705
1	47596003	1:47596003	A	G	713	0.446867	0.226991	0.0468792
1	47630609	1:47630609	C	T	713	1.18565	0.521739	0.0122307
1	47632079	1:47632079	T	C	713	1.70113	0.649684	0.00294422
1	47637498	1:47637498	A	G	713	0.325596	0.12808	0.0107186
1	47643553	1:47643553	C	T	713	-0.498902	0.201115	0.0125606
1	47711148	1:47711148	A	C	713	-1.8602	0.777552	0.00714595
1	47737592	1:47737592	C	T	713	0.833432	0.381786	0.0243966
1	47744201	1:47744201	G	A	713	0.350442	0.153197	0.0213481
1	47751214	1:47751214	G	A	713	0.320169	0.161414	0.0465157
1	47752769	1:47752769	C	T	713	0.464944	0.152313	0.00207879
1	47756378	1:47756378	A	C	713	-0.444809	0.152276	0.00330309
1	47827031	1:47827031	T	G	713	-0.607513	0.301913	0.0398814
1	47844280	1:47844280	A	G	713	-1.54168	0.660502	0.0130413
1	47876951	1:47876951	G	A	713	2.02953	0.75913	0.00165444
1	47951289	1:47951289	T	C	713	-0.938056	0.50346	0.0490388
1	47951535	1:47951535	A	G	713	0.516064	0.214568	0.0151398
1	47978334	1:47978334	T	C	713	0.269307	0.131634	0.0404176
1	48027403	1:48027403	A	G	713	1.22043	0.507224	0.010985
1	48030342	1:48030342	G	A	713	1.06898	0.40615	0.00660754
1	48051985	1:48051985	C	A	713	0.363906	0.158736	0.0211009
1	48054629	1:48054629	T	C	713	1.16178	0.514213	0.0151901
1	48063090	1:48063090	C	T	713	-0.622592	0.308756	0.0399255
1	48070455	1:48070455	G	A	713	-1.80213	0.946753	0.0197111
1	48078417	1:48078417	C	T	713	0.340906	0.128728	0.0077861
1	48094620	1:48094620	A	C	713	0.992548	0.400635	0.00904565
1	48106192	1:48106192	A	G	713	-0.774016	0.309314	0.0101487
1	48116419	1:48116419	T	C	713	1.36535	0.499851	0.00360471
1	48131220	1:48131220	C	T	713	-0.403821	0.180849	0.025064
1	48182051	1:48182051	A	C	713	1.36831	0.743245	0.0462466
1	48205455	1:48205455	G	T	713	-1.25199	0.495385	0.00717365
1	48208783	1:48208783	A	G	713	0.340498	0.131873	0.0095812
1	48252255	1:48252255	G	A	713	1.75412	0.64433	0.00134097
1	48512531	1:48512531	A	G	713	-1.2694	0.663708	0.0424835
1	48527275	1:48527275	T	G	713	-0.410108	0.169124	0.014963
1	48580263	1:48580263	A	G	713	-1.25507	0.628253	0.0324661
1	48585822	1:48585822	G	A	713	0.850176	0.432457	0.0431122
1	48592616	1:48592616	C	T	713	1.11998	0.577442	0.0397548
1	48607156	1:48607156	A	G	713	1.22633	0.594082	0.0291938
1	48619845	1:48619845	T	C	713	-1.38833	0.57552	0.00990193
1	48628005	1:48628005	G	A	713	-1.23272	0.61673	0.0340596
1	48689167	1:48689167	C	T	713	-0.564842	0.279441	0.0405042
1	48695395	1:48695395	T	C	713	0.955482	0.434059	0.0206334
1	48718655	1:48718655	T	C	713	0.34003	0.14862	0.0215229
1	48781305	1:48781305	C	T	713	0.360373	0.169688	0.0326167
1	48793940	1:48793940	T	C	713	-0.394033	0.18575	0.032658
1	48894079	1:48894079	T	C	713	-1.45874	0.472523	0.000901716
1	48914988	1:48914988	A	G	713	0.765316	0.346684	0.0245776
1	48986890	1:48986890	A	G	713	-0.902706	0.457492	0.0371869
1	49072860	1:49072860	A	C	713	-1.18069	0.6083	0.0432086
1	49187967	1:49187967	G	T	713	0.922699	0.347563	0.00649636
1	49446972	1:49446972	A	G	713	-0.959685	0.429636	0.0184064
1	49451824	1:49451824	A	G	713	0.656693	0.335517	0.0442486
1	49585317	1:49585317	G	A	713	0.948752	0.347114	0.00502528
1	49853525	1:49853525	G	A	713	-0.682818	0.340264	0.0432942
1	49939060	1:49939060	A	C	713	0.964904	0.364653	0.00640088
1	50008401	1:50008401	C	T	713	-0.569764	0.230513	0.0122583
1	50114394	1:50114394	G	A	713	-2.00558	0.923925	0.00684384
1	50183465	1:50183465	A	G	713	0.652859	0.337846	0.0490433
1	50191249	1:50191249	G	A	713	1.03071	0.409728	0.00831094
1	50316578	1:50316578	A	G	713	1.60437	0.676259	0.0086812
1	50346803	1:50346803	C	T	713	1.30179	0.697254	0.0395549
1	50358920	1:50358920	T	C	713	0.53748	0.24255	0.0244608
1	50405820	1:50405820	C	T	713	-1.39758	0.62773	0.0203371
1	50514789	1:50514789	C	T	713	0.712666	0.310193	0.0179333
1	50661965	1:50661965	T	C	713	1.25668	0.659721	0.0380654
1	50683750	1:50683750	C	T	713	0.393554	0.191968	0.0387963
1	50807935	1:50807935	T	C	713	-1.14765	0.552633	0.0254431
1	51002266	1:51002266	T	C	713	1.07557	0.53262	0.0319912
1	51008691	1:51008691	G	A	713	0.899826	0.480071	0.0489384
1	51082020	1:51082020	A	G	713	0.857143	0.43017	0.0347488
1	51103242	1:51103242	T	C	713	-1.29	0.687828	0.04385
1	51124336	1:51124336	T	C	713	-1.45251	0.559542	0.00504789
1	51191486	1:51191486	G	A	713	-1.57846	0.655855	0.00635653
1	51230970	1:51230970	A	G	713	-1.68568	0.67918	0.00562639
1	51358485	1:51358485	T	G	713	1.41926	0.55608	0.00372658
1	51430946	1:51430946	T	C	713	-0.786083	0.414713	0.0474668
1	51519370	1:51519370	T	C	713	-0.743899	0.261226	0.00372177
1	51615154	1:51615154	T	C	713	-0.629179	0.313113	0.040411
1	51618948	1:51618948	A	G	713	1.22067	0.580092	0.0297194
1	51661746	1:51661746	T	C	713	1.37563	0.689719	0.0294164
1	51803198	1:51803198	A	G	713	-1.55642	0.651088	0.00936052
1	51910970	1:51910970	A	G	713	0.604882	0.242602	0.0119017
1	51915592	1:51915592	T	C	713	-0.836929	0.337304	0.0105584
1	52091848	1:52091848	A	G	713	-0.862158	0.397869	0.0265736
1	52091965	1:52091965	T	C	713	-0.893399	0.436016	0.0348988
1	52190521	1:52190521	A	G	713	0.96866	0.460775	0.0280821
1	52218617	1:52218617	G	A	713	-1.83083	0.659593	0.00169703
1	52232269	1:52232269	C	T	713	-0.951838	0.495653	0.0461477
1	52330578	1:52330578	T	C	713	0.364925	0.172416	0.0333104
1	52353858	1:52353858	C	A	713	-1.60548	0.645787	0.00587516
1	52386057	1:52386057	A	G	713	-0.473861	0.162908	0.00324766
1	52483793	1:52483793	A	C	713	-1.92105	0.706452	0.00202731
1	52508793	1:52508793	G	A	713	-1.31815	0.645858	0.0377329
1	52690195	1:52690195	C	T	713	-0.307418	0.142048	0.0297996
1	52808672	1:52808672	T	C	713	-0.789058	0.403285	0.046381
1	52859103	1:52859103	T	G	713	-1.06531	0.432707	0.00984872
1	52869728	1:52869728	G	T	713	1.23122	0.627619	0.0350663
1	53004394	1:53004394	C	A	713	-0.463884	0.194571	0.0164907
1	53055570	1:53055570	A	G	713	1.5301	0.504434	0.000672853
1	53099149	1:53099149	T	C	713	-0.4117	0.191603	0.0313083
1	53099835	1:53099835	T	C	713	0.874972	0.310401	0.00400424
1	53103565	1:53103565	A	G	713	1.20353	0.644214	0.0458649
1	53113911	1:53113911	A	G	713	0.433501	0.13416	0.0011354
1	53121507	1:53121507	T	C	713	0.297387	0.133009	0.0244281
1	53154668	1:53154668	C	T	713	-0.482623	0.230006	0.0341649
1	53167847	1:53167847	A	G	713	-1.33894	0.576664	0.0125461
1	53174773	1:53174773	T	C	713	-1.07395	0.545662	0.0360296
1	53189844	1:53189844	A	G	713	1.30964	0.621459	0.0164165
1	53282993	1:53282993	G	A	713	0.372729	0.181995	0.0394866
1	53289445	1:53289445	A	G	713	-0.426817	0.172213	0.0123489
1	53309229	1:53309229	T	C	713	-1.26762	0.582995	0.0237471
1	53333736	1:53333736	A	C	713	0.417518	0.177764	0.0176027
1	53360693	1:53360693	A	G	713	-0.948312	0.484085	0.0410809
1	53363206	1:53363206	A	G	713	1.09528	0.535364	0.0362093
1	53382815	1:53382815	A	G	713	-0.988057	0.35377	0.00378103
1	53447770	1:53447770	G	A	713	1.99365	0.691053	0.00122783
1	53492990	1:53492990	G	T	713	-1.13588	0.397332	0.00267313
1	53504550	1:53504550	A	G	713	0.711332	0.295432	0.0131051
1	53536019	1:53536019	A	G	713	-1.16924	0.499608	0.0173045
1	53539750	1:53539750	C	T	713	-0.277169	0.124204	0.0251316
1	53583300	1:53583300	A	C	713	-0.984995	0.484004	0.0363714
1	53711048	1:53711048	G	A	713	-0.797707	0.395377	0.0387998
1	53720816	1:53720816	T	C	713	-0.541188	0.152843	0.000338384
1	53877680	1:53877680	C	T	713	-1.23564	0.592213	0.02362
1	53887255	1:53887255	C	T	713	-0.798755	0.408318	0.0397786
1	53893357	1:53893357	T	C	713	-0.745926	0.31712	0.0157022
1	53902580	1:53902580	C	A	713	-0.268324	0.130402	0.038618
1	54004316	1:54004316	A	G	713	-1.44607	0.61475	0.0133583
1	54112728	1:54112728	A	G	713	-0.290602	0.134133	0.0296859
1	54157013	1:54157013	T	C	713	0.870039	0.43016	0.0365469
1	54166655	1:54166655	T	G	713	1.01069	0.438971	0.0176194
1	54214385	1:54214385	G	A	713	-0.384258	0.185518	0.0357635
1	54234668	1:54234668	G	T	713	-1.48682	0.650121	0.0121266
1	54246948	1:54246948	A	G	713	0.732323	0.371069	0.043438
1	54286750	1:54286750	A	G	713	0.707298	0.362811	0.0465725
1	54304742	1:54304742	C	T	713	1.56325	0.662554	0.00826514
1	54306586	1:54306586	A	G	713	0.710055	0.287645	0.0121812
1	54316966	1:54316966	T	C	713	-0.723611	0.275374	0.00753199
1	54323607	1:54323607	A	C	713	1.00847	0.496569	0.0356041
1	54326308	1:54326308	T	C	713	0.655615	0.242259	0.00595744
1	54366029	1:54366029	A	C	713	-1.62987	0.689092	0.00876718
1	54393006	1:54393006	A	G	713	-0.775493	0.297538	0.00683471
1	54407436	1:54407436	T	C	713	0.715751	0.234458	0.00187824
1	54494500	1:54494500	C	T	713	0.429487	0.213368	0.0423936
1	54568196	1:54568196	T	C	713	-0.274876	0.137908	0.0450682
1	54570227	1:54570227	A	G	713	-1.22739	0.65422	0.0371612
1	54633028	1:54633028	G	A	713	1.54495	0.669868	0.01448
1	54642486	1:54642486	G	A	713	0.311788	0.131151	0.0170706
1	54645725	1:54645725	C	T	713	1.05146	0.444287	0.0143993
1	54671924	1:54671924	A	G	713	1.30501	0.602973	0.0182608
1	54718288	1:54718288	A	G	713	0.976785	0.415348	0.0128855
1	54722016	1:54722016	G	A	713	-0.851543	0.43079	0.0409345
1	54765936	1:54765936	T	C	713	-1.54097	0.690953	0.0154216
1	54776281	1:54776281	T	C	713	0.673046	0.313892	0.0289508
1	54790039	1:54790039	T	C	713	-1.64632	0.69393	0.00850883
1	54795278	1:54795278	T	G	713	0.45513	0.232347	0.0478773
1	54795548	1:54795548	A	G	713	-0.694441	0.332627	0.033676
1	54796079	1:54796079	T	C	713	0.265325	0.129057	0.0389063
1	54798959	1:54798959	G	A	713	0.518857	0.258307	0.0406687
1	54813649	1:54813649	G	T	713	-0.641984	0.292063	0.0255923
1	54848971	1:54848971	T	G	713	-1.30636	0.563404	0.0137772
1	54881562	1:54881562	G	A	713	-0.307378	0.12858	0.0162656
1	54882573	1:54882573	A	C	713	-0.905693	0.365676	0.0110782
1	54903163	1:54903163	A	G	713	-1.23297	0.669397	0.0416716
1	54921452	1:54921452	T	C	713	-0.284702	0.132537	0.0312507
1	55011679	1:55011679	A	C	713	-1.53417	0.687773	0.0131
1	55012297	1:55012297	T	C	713	0.724292	0.323153	0.0218042
1	55040788	1:55040788	A	G	713	1.17762	0.65424	0.0412392
1	55043444	1:55043444	T	C	713	-0.83656	0.39333	0.0284178
1	55050331	1:55050331	A	C	713	-0.344226	0.129316	0.00743002
1	55063818	1:55063818	T	C	713	-1.52757	0.710768	0.0170286
1	55091301	1:55091301	C	T	713	-1.40641	0.553304	0.00697044
1	55195646	1:55195646	C	A	713	1.05651	0.483755	0.0231809
1	55245792	1:55245792	G	A	713	-0.750788	0.30279	0.0105962
1	55256962	1:55256962	A	G	713	-1.23755	0.664375	0.0352777
1	55258144	1:55258144	G	A	713	-0.279113	0.12626	0.026788
1	55318243	1:55318243	T	C	713	0.899381	0.46759	0.0460914
1	55339745	1:55339745	A	G	713	0.854702	0.433344	0.0405341
1	55361774	1:55361774	A	G	713	0.402598	0.149212	0.00671537
1	55368230	1:55368230	T	C	713	0.874505	0.380629	0.0155067
1	55390057	1:55390057	C	T	713	1.15204	0.569428	0.0355067
1	55432109	1:55432109	C	T	713	-1.47322	0.66698	0.017542
1	55458859	1:55458859	C	T	713	-0.415508	0.188559	0.0266907
1	55488509	1:55488509	A	G	713	-0.339093	0.160596	0.0331032
1	55522436	1:55522436	G	A	713	-1.69654	0.647896	0.00518752
1	55590468	1:55590468	T	C	713	0.964654	0.4577	0.0265558
1	55623225	1:55623225	T	C	713	0.61999	0.234652	0.0075464
1	55629575	1:55629575	C	T	713	1.04967	0.505361	0.0324317
1	55647961	1:55647961	T	C	713	0.487613	0.194853	0.0114948
1	55673003	1:55673003	T	C	713	1.69221	0.647455	0.0029755
1	55731277	1:55731277	C	T	713	0.965346	0.476692	0.0383328
1	55739693	1:55739693	T	C	713	-0.542656	0.236514	0.0207946
1	55747192	1:55747192	G	A	713	0.399601	0.126089	0.00144471
1	55815332	1:55815332	C	T	713	-0.978221	0.412971	0.0148105
1	55824812	1:55824812	A	G	713	-0.893682	0.332108	0.00551595
1	55825084	1:55825084	A	G	713	-2.08972	0.859888	0.00430913
1	55882427	1:55882427	G	T	713	0.949719	0.494033	0.0407286
1	55924517	1:55924517	T	C	713	0.581233	0.248045	0.0182457
1	56000772	1:56000772	C	T	713	-0.961908	0.469182	0.0308994
1	56089952	1:56089952	A	G	713	1.54496	0.811744	0.0179635
1	56156015	1:56156015	T	C	713	0.84536	0.395672	0.0263372
1	56390405	1:56390405	T	G	713	0.800541	0.287899	0.00408865
1	56412957	1:56412957	T	C	713	0.482458	0.241575	0.0439896
1	56439887	1:56439887	T	C	713	-0.315323	0.146062	0.0301641
1	56441209	1:56441209	A	G	713	0.881491	0.344571	0.00767591
1	56555272	1:56555272	T	C	713	-0.293691	0.145313	0.0421998
1	56557868	1:56557868	T	C	713	1.0428	0.527244	0.0380093
1	56582842	1:56582842	T	C	713	0.374623	0.178376	0.0352574
1	56632154	1:56632154	C	T	713	-1.70034	0.742395	0.0119693
1	56641190	1:56641190	C	T	713	1.15147	0.587206	0.0339688
1	56722671	1:56722671	G	A	713	1.15938	0.502094	0.0118073
1	56763172	1:56763172	A	G	713	-1.34588	0.675326	0.0341232
1	56788033	1:56788033	C	A	713	0.398476	0.166934	0.0158413
1	56794738	1:56794738	G	T	713	-1.67134	0.565041	0.00134304
1	56818216	1:56818216	A	G	713	-0.885623	0.412143	0.0259263
1	56821307	1:56821307	T	C	713	-0.410453	0.197699	0.0369913
1	56857691	1:56857691	A	G	713	-0.321209	0.143044	0.0241429
1	56909756	1:56909756	T	C	713	-1.10013	0.492221	0.0199604
1	56934234	1:56934234	T	C	713	0.739386	0.34162	0.0281923
1	57061002	1:57061002	C	T	713	0.901602	0.296052	0.00164896
1	57085028	1:57085028	A	G	713	-2.41488	0.779487	0.000263651
1	57102088	1:57102088	T	G	713	-0.875857	0.430101	0.0350905
1	57151369	1:57151369	A	C	713	-0.902161	0.463826	0.0461105
1	57174799	1:57174799	A	G	713	1.2251	0.485943	0.00856466
1	57199017	1:57199017	A	G	713	0.312719	0.127942	0.0142059
1	57200259	1:57200259	T	C	713	-0.37085	0.188425	0.0487528
1	57242415	1:57242415	T	C	713	0.378384	0.187548	0.0424024
1	57287478	1:57287478	A	G	713	0.889455	0.350068	0.00884362
1	57293780	1:57293780	G	A	713	-0.262182	0.12176	0.0309215
1	57330277	1:57330277	A	G	713	-0.656008	0.267812	0.0124
1	57351330	1:57351330	G	A	713	1.81722	0.772393	0.00633257
1	57413719	1:57413719	G	A	713	0.444058	0.154656	0.00380251
1	57439292	1:57439292	G	A	713	-0.333795	0.141777	0.0181949
1	57449044	1:57449044	C	T	713	-0.283519	0.13308	0.0322062
1	57449213	1:57449213	T	C	713	0.830536	0.382426	0.0259137
1	57454744	1:57454744	A	G	713	0.43636	0.219373	0.0444406
1	57511369	1:57511369	T	C	713	1.3498	0.560982	0.00951634
1	57522528	1:57522528	A	G	713	1.20177	0.485121	0.00860696
1	57543633	1:57543633	A	G	713	-0.815315	0.36013	0.0194048
1	57583786	1:57583786	T	C	713	-0.572666	0.258345	0.0232777
1	57618490	1:57618490	G	A	713	-0.31004	0.122143	0.0109018
1	57620183	1:57620183	T	C	713	0.930696	0.302744	0.00159967
1	57896213	1:57896213	A	G	713	-0.324322	0.148981	0.0285332
1	57905275	1:57905275	T	C	713	0.409473	0.165902	0.0126824
1	57994949	1:57994949	C	A	713	-0.592982	0.305761	0.048854
1	58028272	1:58028272	A	G	713	0.741609	0.360277	0.0348988
1	58028819	1:58028819	T	C	713	-1.74254	0.757464	0.00772165
1	58069395	1:58069395	G	A	713	-0.584692	0.270045	0.0269011
1	58187119	1:58187119	T	G	713	-0.90989	0.416578	0.0235418
1	58218416	1:58218416	T	C	713	0.282031	0.13488	0.0357018
1	58229860	1:58229860	T	C	713	-1.39775	0.57017	0.0101086
1	58260753	1:58260753	A	G	713	-1.13337	0.55281	0.0305914
1	58262015	1:58262015	G	A	713	0.881145	0.36399	0.0122093
1	58325048	1:58325048	T	G	713	-1.48607	0.663195	0.0214477
1	58346091	1:58346091	C	T	713	0.305371	0.125324	0.014343
1	58350374	1:58350374	G	A	713	-0.729423	0.324926	0.0234105
1	58362795	1:58362795	G	A	713	1.20539	0.548515	0.0201925
1	58373515	1:58373515	T	C	713	0.360997	0.127407	0.00445492
1	58383790	1:58383790	C	A	713	-0.610713	0.218191	0.00475839
1	58393984	1:58393984	C	T	713	-1.71554	0.777184	0.0148778
1	58401560	1:58401560	C	T	713	-0.674466	0.333582	0.040928
1	58412294	1:58412294	C	T	713	-0.36003	0.148761	0.0147717
1	58449216	1:58449216	G	A	713	1.18368	0.454364	0.0061947
1	58459736	1:58459736	A	G	713	0.854769	0.413113	0.0287859
1	58494970	1:58494970	A	G	713	-1.09598	0.418041	0.0052706
1	58592422	1:58592422	C	T	713	0.601691	0.244087	0.0120567
1	58606641	1:58606641	C	T	713	0.574293	0.252843	0.0211797
1	58614253	1:58614253	G	A	713	-1.24472	0.557173	0.0167005
1	58680549	1:58680549	A	G	713	-0.402676	0.177353	0.0222469
1	58688004	1:58688004	C	T	713	1.51549	0.621416	0.0117004
1	58726746	1:58726746	A	G	713	0.919957	0.380612	0.0138723
1	58784861	1:58784861	C	T	713	-1.28608	0.554013	0.013815
1	58839988	1:58839988	A	G	713	1.27555	0.592094	0.023134
1	58878049	1:58878049	T	C	713	-1.35568	0.644989	0.0252825
1	58881421	1:58881421	G	A	713	-0.269384	0.13039	0.0381522
1	58903189	1:58903189	T	C	713	-1.64028	0.526708	0.000981974
1	58911484	1:58911484	C	A	713	-0.993414	0.482369	0.0299578
1	58924716	1:58924716	T	C	713	-1.26413	0.51692	0.0093532
1	58961330	1:58961330	A	G	713	0.769936	0.386359	0.0418668
1	59021716	1:59021716	T	C	713	-2.25167	0.832986	0.00192872
1	59023647	1:59023647	C	T	713	0.685051	0.349552	0.0449221
1	59023859	1:59023859	C	A	713	0.268246	0.126861	0.0337691
1	59029750	1:59029750	C	T	713	-0.811705	0.294772	0.00475138
1	59102682	1:59102682	C	T	713	-1.00094	0.384568	0.00747343
1	59120162	1:59120162	A	C	713	0.91138	0.442733	0.0318794
1	59136326	1:59136326	C	T	713	0.388505	0.129244	0.00249971
1	59139525	1:59139525	A	G	713	1.09116	0.448539	0.0115324
1	59180866	1:59180866	T	G	713	1.02932	0.438084	0.0152612
1	59188838	1:59188838	T	C	713	-0.969865	0.477559	0.0297872
1	59283916	1:59283916	C	A	713	-0.278612	0.122743	0.0229636
1	59314155	1:59314155	T	C	713	-1.4239	0.596677	0.0109028
1	59338710	1:59338710	T	C	713	-1.74752	0.774741	0.00898545
1	59452411	1:59452411	G	T	713	-0.626642	0.293769	0.0300255
1	59485617	1:59485617	G	A	713	0.279518	0.123152	0.0226543
1	59518213	1:59518213	A	G	713	-0.722124	0.348946	0.035501
1	59552661	1:59552661	T	C	713	-1.17856	0.649323	0.0477254
1	59652785	1:59652785	A	G	713	1.00523	0.361075	0.00383751
1	59696619	1:59696619	G	T	713	-0.417808	0.15372	0.00634951
1	59703178	1:59703178	A	G	713	-1.48725	0.648343	0.0139425
1	59728215	1:59728215	G	A	713	-0.482944	0.23339	0.0357215
1	59729227	1:59729227	C	T	713	0.383969	0.147368	0.0086149
1	59767919	1:59767919	G	A	713	1.14547	0.512229	0.0199866
1	59782421	1:59782421	G	A	713	1.44761	0.600093	0.0105497
1	59948253	1:59948253	T	C	713	0.492084	0.153697	0.0012815
1	59969222	1:59969222	A	G	713	-0.689581	0.276788	0.0107741
1	60014092	1:60014092	A	C	713	-1.08656	0.504644	0.0260681
1	60029843	1:60029843	A	G	713	-0.988247	0.529482	0.0440869
1	60047563	1:60047563	T	G	713	0.436812	0.178336	0.0133211
1	60058732	1:60058732	A	C	713	1.4527	0.61943	0.0109713
1	60060615	1:60060615	T	G	713	-0.426506	0.181276	0.0183992
1	60160173	1:60160173	T	C	713	-1.28665	0.57072	0.0172747
1	60209296	1:60209296	A	G	713	-0.344031	0.126868	0.00629825
1	60226171	1:60226171	C	T	713	1.19393	0.409474	0.00238908
1	60231462	1:60231462	A	G	713	0.903031	0.360947	0.00976832
1	60410105	1:60410105	A	G	713	0.295655	0.140288	0.0341287
1	60440769	1:60440769	C	T	713	0.77525	0.371656	0.0314855
1	60504145	1:60504145	G	A	713	-1.11181	0.583759	0.0431758
1	60532205	1:60532205	G	A	713	-1.35751	0.607248	0.0191307
1	60601310	1:60601310	T	G	713	-1.25159	0.585623	0.0202316
1	60667113	1:60667113	T	C	713	-0.343364	0.133265	0.00955213
1	60716667	1:60716667	T	C	713	1.34868	0.731398	0.0357816
1	60777684	1:60777684	T	C	713	1.02576	0.518904	0.0377781
1	60791995	1:60791995	G	A	713	-1.00127	0.407625	0.0116797
1	60894507	1:60894507	C	T	713	0.829209	0.311175	0.00594101
1	60913988	1:60913988	A	G	713	-0.655078	0.277288	0.0167024
1	60929432	1:60929432	C	T	713	-0.276283	0.123346	0.0245901
1	60930990	1:60930990	G	A	713	0.445948	0.15009	0.00276771
1	60941060	1:60941060	C	T	713	0.374121	0.16049	0.0191827
1	60967266	1:60967266	C	T	713	0.316566	0.162342	0.0497405
1	60978896	1:60978896	G	A	713	0.665554	0.301488	0.0235169
1	60988348	1:60988348	C	T	713	-1.06401	0.499533	0.0266109
1	61003521	1:61003521	T	G	713	2.14163	0.919774	0.00313336
1	61006948	1:61006948	A	G	713	-0.953619	0.405028	0.0137705
1	61010524	1:61010524	C	T	713	0.79405	0.375057	0.0302461
1	61015392	1:61015392	A	G	713	0.577007	0.267993	0.0288855
1	61025813	1:61025813	C	T	713	0.769866	0.326804	0.0155797
1	61176945	1:61176945	A	G	713	0.529326	0.221183	0.0156034
1	61184792	1:61184792	A	G	713	1.70895	0.770683	0.0131296
1	61205087	1:61205087	G	A	713	0.61494	0.307829	0.0424131
1	61210165	1:61210165	A	G	713	1.17905	0.617043	0.0444028
1	61261249	1:61261249	T	C	713	-0.666234	0.313489	0.0298174
1	61314091	1:61314091	T	C	713	0.695221	0.21866	0.00131908
1	61318949	1:61318949	C	T	713	-1.11515	0.490201	0.0152167
1	61380824	1:61380824	A	C	713	-0.529014	0.262051	0.0401292
1	61398559	1:61398559	C	A	713	-0.279022	0.136736	0.0404865
1	61400124	1:61400124	A	G	713	1.24013	0.520756	0.0115667
1	61421596	1:61421596	T	C	713	0.362359	0.141041	0.00983671
1	61460812	1:61460812	T	G	713	1.11178	0.525687	0.0263554
1	61511609	1:61511609	C	T	713	-0.381495	0.162375	0.0187223
1	61513360	1:61513360	C	T	713	-0.965622	0.469046	0.0270901
1	61516972	1:61516972	T	C	713	0.422319	0.136644	0.00186793
1	61554414	1:61554414	T	C	713	0.690459	0.33859	0.038111
1	61572449	1:61572449	A	G	713	0.595592	0.194253	0.00186948
1	61584184	1:61584184	T	G	713	1.27014	0.532927	0.0128558
1	61587597	1:61587597	C	T	713	-1.57525	0.556025	0.00175089
1	61600233	1:61600233	A	G	713	-0.987848	0.421306	0.0147255
1	61607308	1:61607308	A	G	713	1.23012	0.629711	0.035855
1	61615297	1:61615297	A	G	713	-0.389426	0.17872	0.02877
1	61620998	1:61620998	A	G	713	0.455241	0.137606	0.000830501
1	61640750	1:61640750	C	T	713	-1.10066	0.439241	0.00764716
1	61664116	1:61664116	C	T	713	-1.30097	0.647853	0.0377694
1	61667330	1:61667330	C	T	713	-0.402166	0.174877	0.0210005
1	61776081	1:61776081	G	A	713	1.41346	0.407325	0.000247457
1	61784864	1:61784864	T	C	713	0.691798	0.235237	0.0027628
1	61828332	1:61828332	G	A	713	0.481852	0.231705	0.0358542
1	61858072	1:61858072	G	A	713	-0.283379	0.140206	0.0428667
1	61859620	1:61859620	G	T	713	-0.758763	0.317421	0.0147662
1	61948482	1:61948482	G	A	713	-0.867828	0.415512	0.0329541
1	61971257	1:61971257	T	C	713	-0.279615	0.135512	0.0382006
1	62001640	1:62001640	T	C	713	1.14898	0.541419	0.0245375
1	62019894	1:62019894	T	C	713	-0.610289	0.300985	0.0383548
1	62031230	1:62031230	G	A	713	0.451318	0.154346	0.00331627
1	62080166	1:62080166	T	C	713	1.79049	0.667314	0.00254906
1	62119679	1:62119679	T	C	713	0.302291	0.144285	0.0354895
1	62174452	1:62174452	G	A	713	1.89132	0.963177	0.016239
1	62177915	1:62177915	T	C	713	0.291461	0.1263	0.0202376
1	62211897	1:62211897	A	G	713	-0.932685	0.480257	0.0424776
1	62213089	1:62213089	C	T	713	0.26905	0.129478	0.0369445
1	62228780	1:62228780	A	G	713	0.602843	0.280361	0.0279029
1	62264824	1:62264824	A	G	713	-0.407141	0.139301	0.00325162
1	62266179	1:62266179	T	C	713	-0.783157	0.364082	0.0264576
1	62275343	1:62275343	T	C	713	-1.01929	0.507493	0.0366547
1	62295454	1:62295454	A	G	713	0.441164	0.143099	0.00187327
1	62303472	1:62303472	T	C	713	0.417421	0.201492	0.0368528
1	62312443	1:62312443	A	C	713	-1.48959	0.71089	0.0204273
1	62325598	1:62325598	T	C	713	1.10539	0.581412	0.042191
1	62328388	1:62328388	C	A	713	-0.363476	0.170333	0.0330446
1	62348135	1:62348135	A	G	713	-0.548478	0.281178	0.048935
1	62395262	1:62395262	T	C	713	-1.31043	0.471992	0.00477254
1	62416311	1:62416311	T	C	713	-1.3196	0.559168	0.0127829
1	62531902	1:62531902	C	A	713	-0.396923	0.185907	0.0311537
1	62561151	1:62561151	C	T	713	0.944994	0.344954	0.00396908
1	62723893	1:62723893	G	A	713	0.31241	0.141602	0.0265381
1	62758770	1:62758770	A	C	713	-0.78558	0.395048	0.0464494
1	62814893	1:62814893	T	C	713	-1.46595	0.742685	0.0308802
1	62882451	1:62882451	A	G	713	0.96535	0.469873	0.0318537
1	62897700	1:62897700	T	C	713	0.929654	0.445236	0.0314673
1	62908010	1:62908010	A	C	713	-1.51674	0.667329	0.0176364
1	62921287	1:62921287	G	A	713	-0.380023	0.160499	0.017256
1	62922546	1:62922546	A	G	713	1.17244	0.603363	0.034044
1	62951139	1:62951139	A	C	713	-0.802521	0.411009	0.0459812
1	62962911	1:62962911	G	A	713	-1.70154	0.685863	0.00568683
1	62980840	1:62980840	A	G	713	-0.332702	0.132251	0.0114296
1	62989918	1:62989918	C	A	713	-0.484439	0.248932	0.0496329
1	63008602	1:63008602	T	C	713	-0.836549	0.378424	0.0239304
1	63013690	1:63013690	T	C	713	-0.463808	0.227372	0.0397384
1	63016431	1:63016431	A	G	713	-0.877762	0.453532	0.0442069
1	63029092	1:63029092	T	C	713	1.34105	0.531542	0.00811185
1	63037668	1:63037668	C	A	713	0.356938	0.129638	0.00568932
1	63082097	1:63082097	G	A	713	-1.34294	0.61608	0.0186518
1	63085423	1:63085423	T	C	713	0.563569	0.214419	0.00692835
1	63093056	1:63093056	G	T	713	-1.14331	0.57839	0.0420814
1	63117066	1:63117066	A	G	713	-0.595071	0.251289	0.0165512
1	63124551	1:63124551	C	T	713	0.337095	0.145141	0.019668
1	63209489	1:63209489	C	T	713	-0.514967	0.250864	0.0380917
1	63212545	1:63212545	T	C	713	0.420806	0.209867	0.0429141
1	63300889	1:63300889	G	A	713	-0.423103	0.187734	0.0231601
1	63315469	1:63315469	A	G	713	0.964911	0.362758	0.00633053
1	63317801	1:63317801	C	T	713	0.289181	0.141711	0.0401264
1	63324832	1:63324832	C	T	713	0.372731	0.153512	0.0145134
1	63325908	1:63325908	C	T	713	-0.978778	0.402998	0.0091939
1	63357853	1:63357853	C	T	713	0.845277	0.396556	0.029766
1	63382737	1:63382737	A	G	713	-1.12877	0.393461	0.00248983
1	63386933	1:63386933	T	C	713	-0.981027	0.44721	0.0240519
1	63619201	1:63619201	C	T	713	-1.08619	0.470366	0.0132865
1	63634406	1:63634406	C	A	713	1.43791	0.490017	0.00184842
1	63636443	1:63636443	G	A	713	0.359037	0.129942	0.00544014
1	63698339	1:63698339	A	G	713	0.495527	0.243565	0.040911
1	63702065	1:63702065	T	C	713	0.475477	0.242874	0.0478322
1	63814006	1:63814006	C	T	713	0.480133	0.208589	0.019828
1	63829542	1:63829542	A	G	713	1.34925	0.597122	0.0169134
1	63834798	1:63834798	A	G	713	-1.01571	0.533761	0.048578
1	63873368	1:63873368	G	T	713	0.581147	0.227601	0.00951525
1	63897597	1:63897597	T	G	713	0.561887	0.170748	0.000864311
1	64059956	1:64059956	A	G	713	-0.459271	0.223248	0.03861
1	64075318	1:64075318	A	G	713	1.44816	0.558957	0.00526369
1	64078872	1:64078872	G	A	713	-0.903801	0.459408	0.0411566
1	64106028	1:64106028	A	G	713	0.491756	0.194671	0.0107723
1	64131650	1:64131650	C	T	713	1.58683	0.810293	0.0275226
1	64137548	1:64137548	A	G	713	-0.509848	0.175288	0.00344255
1	64162228	1:64162228	C	T	713	-0.369666	0.132444	0.00503443
1	64182160	1:64182160	G	T	713	0.940121	0.484729	0.0461562
1	64206843	1:64206843	A	G	713	0.63519	0.279409	0.0218993
1	64214641	1:64214641	T	G	713	-0.329665	0.132263	0.0123095
1	64277395	1:64277395	G	T	713	1.31473	0.686069	0.0352679
1	64396264	1:64396264	C	A	713	0.710769	0.354954	0.0414333
1	64401540	1:64401540	T	C	713	-1.03943	0.460641	0.0171656
1	64460862	1:64460862	C	T	713	-0.336265	0.136487	0.013255
1	64467505	1:64467505	A	G	713	0.289301	0.144313	0.0440159
1	64483873	1:64483873	T	C	713	-1.46331	0.647223	0.0167155
1	64537786	1:64537786	T	G	713	-0.29869	0.148236	0.0427711
1	64573459	1:64573459	G	A	713	-2.58819	0.951915	0.000542463
1	64576178	1:64576178	A	G	713	-0.271128	0.126616	0.0317315
1	64584267	1:64584267	C	A	713	-0.338384	0.157918	0.0314116
1	64603173	1:64603173	T	C	713	-0.979504	0.503439	0.0409289
1	64638263	1:64638263	C	T	713	0.303478	0.151523	0.0447425
1	64659865	1:64659865	C	T	713	0.910103	0.391556	0.0179912
1	64660039	1:64660039	G	A	713	-1.24687	0.470789	0.00459685
1	64683833	1:64683833	T	C	713	0.544357	0.196752	0.00530616
1	64746766	1:64746766	A	G	713	-1.2649	0.587094	0.0247725
1	64906379	1:64906379	C	T	713	1.48322	0.607135	0.00787626
1	64960141	1:64960141	T	C	713	-0.497864	0.19849	0.0113616
1	65046084	1:65046084	G	A	713	-1.17597	0.494202	0.0132032
1	65077148	1:65077148	T	C	713	-0.672535	0.312365	0.0279544
1	65107597	1:65107597	G	A	713	0.630196	0.243402	0.00844034
1	65137380	1:65137380	T	C	713	0.580377	0.280426	0.0358765
1	65196146	1:65196146	C	T	713	1.01643	0.423216	0.0107349
1	65232159	1:65232159	G	A	713	0.76159	0.304674	0.0111789
1	65342776	1:65342776	G	A	713	-0.98898	0.477564	0.0349848
1	65419100	1:65419100	C	T	713	-1.2635	0.60826	0.0265932
1	65425236	1:65425236	T	C	713	1.92762	0.622919	0.000563248
1	65429077	1:65429077	G	T	713	1.25971	0.670105	0.038892
1	65513597	1:65513597	C	T	713	0.372808	0.162616	0.0208867
1	65731555	1:65731555	T	C	713	1.04627	0.46392	0.019777
1	65837963	1:65837963	T	C	713	1.05893	0.559812	0.0445266
1	65840631	1:65840631	T	C	713	-1.27017	0.381652	0.000542638
1	65861234	1:65861234	A	G	713	0.287352	0.136406	0.0343155
1	65894642	1:65894642	G	A	713	0.340155	0.166777	0.0403748
1	65954975	1:65954975	T	G	713	1.05817	0.465484	0.0180132
1	66050123	1:66050123	G	A	713	0.506491	0.23112	0.0273905
1	66135728	1:66135728	G	A	713	0.278864	0.124035	0.0241958
1	66224150	1:66224150	A	G	713	-2.18681	0.708731	0.000683959
1	66226202	1:66226202	C	T	713	-0.278487	0.131216	0.0328375
1	66232257	1:66232257	G	A	713	0.880365	0.339487	0.00763396
1	66249302	1:66249302	G	T	713	0.391679	0.15661	0.0119006
1	66259023	1:66259023	A	G	713	1.93758	0.748127	0.00230754
1	66292529	1:66292529	C	T	713	1.45442	0.670117	0.0199627
1	66326981	1:66326981	A	G	713	0.276056	0.129407	0.032481
1	66349669	1:66349669	T	C	713	-1.09244	0.521465	0.0304383
1	66393674	1:66393674	A	G	713	1.21551	0.504892	0.0122062
1	66419278	1:66419278	C	T	713	-1.01074	0.481663	0.0272527
1	66473747	1:66473747	T	C	713	-0.731522	0.3455	0.0312018
1	66516671	1:66516671	T	C	713	-1.18948	0.604588	0.043437
1	66622367	1:66622367	C	T	713	-1.37716	0.449166	0.00112479
1	66751904	1:66751904	T	G	713	1.00053	0.474021	0.0289155
1	66766432	1:66766432	G	A	713	-1.0476	0.527911	0.0403618
1	66775597	1:66775597	G	A	713	1.00949	0.462764	0.0245737
1	66814832	1:66814832	A	G	713	0.475976	0.187679	0.00999494
1	66822546	1:66822546	A	C	713	-0.535864	0.267819	0.0425138
1	66838001	1:66838001	C	T	713	0.708383	0.372057	0.0495348
1	66931593	1:66931593	G	A	713	1.5803	0.512695	0.000920958
1	66942990	1:66942990	C	T	713	-0.75421	0.286394	0.00678375
1	66947368	1:66947368	G	A	713	-1.06258	0.565068	0.0487686
1	66975992	1:66975992	T	G	713	0.31729	0.153895	0.0388356
1	66984748	1:66984748	G	A	713	0.942254	0.478165	0.0405695
1	67025071	1:67025071	T	C	713	-1.37703	0.577478	0.010865
1	67069741	1:67069741	G	A	713	-0.583826	0.257269	0.0213501
1	67134418	1:67134418	C	T	713	-0.340513	0.165774	0.0386625
1	67186263	1:67186263	T	C	713	1.38094	0.67865	0.0244197
1	67196747	1:67196747	G	A	713	-1.12286	0.440298	0.00797297
1	67204596	1:67204596	G	A	713	1.24579	0.564367	0.0167124
1	67262192	1:67262192	T	G	713	1.01569	0.479865	0.0238611
1	67301850	1:67301850	C	T	713	-0.84774	0.373948	0.0195695
1	67302310	1:67302310	A	G	713	0.303352	0.142483	0.0323914
1	67308912	1:67308912	T	C	713	-0.317847	0.154015	0.0379927
1	67331621	1:67331621	T	C	713	-0.563678	0.255023	0.0244197
1	67357834	1:67357834	A	G	713	-1.80857	0.651079	0.00224409
1	67440746	1:67440746	A	C	713	-0.429934	0.132326	0.00109247
1	67463581	1:67463581	T	C	713	1.0796	0.311614	0.000393478
1	67483426	1:67483426	T	C	713	1.98769	0.796332	0.00399016
1	67487998	1:67487998	G	A	713	0.32798	0.138001	0.0170028
1	67503442	1:67503442	G	T	713	1.30298	0.670848	0.045458
1	67531798	1:67531798	A	G	713	0.793509	0.361629	0.0246524
1	67544444	1:67544444	C	A	713	0.540907	0.160496	0.000637676
1	67554471	1:67554471	T	C	713	-0.475685	0.240607	0.0447899
1	67567404	1:67567404	T	C	713	-1.38263	0.447119	0.00116145
1	67577642	1:67577642	A	G	713	-0.317555	0.149953	0.0336194
1	67604242	1:67604242	C	T	713	0.539876	0.230228	0.0182394
1	67618075	1:67618075	T	C	713	-0.362936	0.169043	0.0309065
1	67624870	1:67624870	T	G	713	0.95728	0.286876	0.00060015
1	67625534	1:67625534	T	C	713	-0.618687	0.227383	0.00564937
1	67649214	1:67649214	T	C	713	-0.420625	0.150824	0.00507715
[truncated: 77,414 more rows]

## Sheet: S2
Dependent variable	HAM					Dependent variable	HAM
Regression type	Logistic regression					Regression type	Logistic regression
Comparison of models						Comparison of models
Simpler model	Model 1					Simpler model	Model 1
Probability it is correct	<0.01%					Probability it is correct	5.495%
Alternative model	Model 2					Alternative model	Model 2
Probability it is correct	>99.99%					Probability it is correct	94.5%
Ratio of probabilities	4516104					Ratio of probabilities	17.2
Preferred model	Model 2					Preferred model	Model 2
Difference in AICc	30.65					Difference in AICc	5.689
Model 1						Model 1
Parameter estimates	Variable	Estimate	Standard error	95% CI (profile likelihood)		Parameter estimates	Variable	Estimate	Standard error	95% CI (profile likelihood)
β0	Intercept	-0.2379	0.0802	-0.3961 to -0.08152		β0	Intercept	-2.125	0.5353	-3.198 to -1.095
β1	PRS all	0.4708	0.1219	0.2351 to 0.7138		β1	Age	0.01753	0.007854	0.002315 to 0.03318
						β2	sex[0]	0.2146	0.2187	-0.2116 to 0.6468
Odds ratios	Variable	Estimate	95% CI (profile likelihood)			β3	log PVL	0.1687	0.06031	0.05180 to 0.2887
β0	Intercept	0.7883	0.6729 to 0.9217
β1	PRS all	1.601	1.265 to 2.042			Odds ratios	Variable	Estimate	95% CI (profile likelihood)
						β0	Intercept	0.1195	0.04086 to 0.3346
Sig. diff. than zero?	Variable	|Z|	P value	P value summary		β1	Age	1.018	1.002 to 1.034
β0	Intercept	2.966	0.00301571	**		β2	sex[0]	1.239	0.8093 to 1.909
β1	PRS all	3.861	0.000112759	***		β3	log PVL	1.184	1.053 to 1.335
Area under the ROC curve						Sig. diff. than zero?	Variable	|Z|	P value	P value summary
Area	0.5771					β0	Intercept	3.97	7.2e-05	****
Std. Error	0.02135					β1	Age	2.231	0.025656	*
95% confidence interval	0.5352 to 0.6189					β2	sex[0]	0.9816	0.326315	ns
P value	0.000380017					β3	log PVL	2.796	0.005168	**
Classification table	Predicted 0	Predicted 1	Total	% Correctly classified
Observed 0	285	97	382	74.61		Area under the ROC curve
Observed 1	215	116	331	35.05		Area	0.6154
Total	500	213	713	56.24		Std. Error	0.02844
						95% confidence interval	0.5596 to 0.6711
Model 2						P value	7.4e-05
Parameter estimates	Variable	Estimate	Standard error	95% CI (profile likelihood)
β0	Intercept	-2.386	0.3916	-3.169 to -1.632		Classification table	Predicted 0	Predicted 1	Total	% Correctly classified
β1	PRS all	0.5127	0.1247	0.2718 to 0.7612		Observed 0	217	28	245	88.57
β2	Age	0.03256	0.00612	0.02075 to 0.04477		Observed 1	126	39	165	23.64
β3	sex[0]	0.3298	0.1627	0.01195 to 0.6501		Total	343	67	410	62.44
Odds ratios	Variable	Estimate	95% CI (profile likelihood)
β0	Intercept	0.092	0.04206 to 0.1956			Model 2
β1	PRS all	1.67	1.312 to 2.141			Parameter estimates	Variable	Estimate	Standard error	95% CI (profile likelihood)
β2	Age	1.033	1.021 to 1.046			β0	Intercept	-2.304	0.5467	-3.402 to -1.254
β3	sex[0]	1.391	1.012 to 1.916			β1	PRS all	0.4322	0.159	0.1260 to 0.7511
						β2	Age	0.01855	0.007971	0.003130 to 0.03445
Sig. diff. than zero?	Variable	|Z|	P value	P value summary		β3	sex[0]	0.2639	0.2212	-0.1669 to 0.7012
β0	Intercept	6.093	1.10732e-09	****		β4	log PVL	0.1765	0.06094	0.05851 to 0.2979
β1	PRS all	4.112	3.91505e-05	****
β2	Age	5.32	1.03517e-07	****		Odds ratios	Variable	Estimate	95% CI (profile likelihood)
β3	sex[0]	2.027	0.0426463	*		β0	Intercept	0.09983	0.03331 to 0.2853
						β1	PRS all	1.541	1.134 to 2.119
Area under the ROC curve						β2	Age	1.019	1.003 to 1.035
Area	0.649					β3	sex[0]	1.302	0.8463 to 2.016
Std. Error	0.02051					β4	log PVL	1.193	1.060 to 1.347
95% confidence interval	0.6088 to 0.6892
P value	6.43e-12					Sig. diff. than zero?	Variable	|Z|	P value	P value summary
						β0	Intercept	4.215	2.5e-05	****
Classification table	Predicted 0	Predicted 1	Total	% Correctly classified		β1	PRS all	2.718	0.006571	**
Observed 0	275	107	382	71.99		β2	Age	2.327	0.019956	*
Observed 1	166	165	331	49.85		β3	sex[0]	1.193	0.232845	ns
Total	441	272	713	61.71		β4	log PVL	2.897	0.003769	**
Data summary						Area under the ROC curve
Rows in table	724					Area	0.6407
Rows skipped (missing data)	11					Std. Error	0.02822
Rows analyzed (#observations)	713					95% confidence interval	0.5854 to 0.6961
Number of 1	331					P value	1e-06
Number of 0	382
Number of parameter estimates	4					Classification table	Predicted 0	Predicted 1	Total	% Correctly classified
#observations/#parameters	178.3					Observed 0	212	33	245	86.53
# of 1/#parameters	82.8					Observed 1	110	55	165	33.33
# of 0/#parameters	95.5					Total	322	88	410	65.12
						Data summary
						Rows in table	724
						Rows skipped (missing data)	314
						Rows analyzed (#observations)	410
						Number of 1	165
						Number of 0	245
						Number of parameter estimates	5
						#observations/#parameters	82
						# of 1/#parameters	33
						# of 0/#parameters	49

## Sheet: S3
CHR	POS	SNP	REF	ALT	BETA	P
1	816376	chr1:816376:T:C	T	C	0.458184	0.0321291
1	897018	chr1:897018:T:C	T	C	-1.19408	0.0156706
1	929375	chr1:929375:A:G	A	G	0.55548	0.012707
1	938654	chr1:938654:G:A	G	A	0.581399	0.0414267
1	954333	chr1:954333:C:A	C	A	-0.553677	0.0409693
1	970892	chr1:970892:A:C	A	C	-0.749272	0.0104676
1	973929	chr1:973929:T:C	T	C	0.543458	0.021529
1	1071823	chr1:1071823:A:G	A	G	0.72918	0.0300114
1	1087765	chr1:1087765:G:A	G	A	0.592479	0.0200634
1	1113609	chr1:1113609:A:G	A	G	-0.613245	0.0388825
1	1187088	chr1:1187088:T:C	T	C	-0.863985	0.000692298
1	1201373	chr1:1201373:T:C	T	C	-0.457197	0.0384399
1	1527386	chr1:1527386:C:T	C	T	-0.507776	0.0495328
1	1585345	chr1:1585345:C:T	C	T	1.05377	0.0420547
1	1653319	chr1:1653319:A:G	A	G	0.412072	0.0472893
1	1744652	chr1:1744652:C:T	C	T	-0.583624	0.00770343
1	1963406	chr1:1963406:G:A	G	A	0.918364	0.00222176
1	2010219	chr1:2010219:C:T	C	T	0.511261	0.0265918
1	2055769	chr1:2055769:T:C	T	C	-0.743613	0.0109725
1	2075942	chr1:2075942:A:G	A	G	-0.747875	0.00351365
1	2082757	chr1:2082757:G:A	G	A	-0.982313	0.0222649
1	2090656	chr1:2090656:C:T	C	T	1.00863	0.00373556
1	2116108	chr1:2116108:G:A	G	A	0.807394	0.0100137
1	2164950	chr1:2164950:A:C	A	C	-1.71325	0.0332579
1	2212052	chr1:2212052:G:A	G	A	0.506256	0.0354654
1	2215527	chr1:2215527:T:C	T	C	0.433739	0.0475153
1	2287068	chr1:2287068:C:T	C	T	-0.786806	0.0183058
1	2304920	chr1:2304920:G:A	G	A	0.774917	0.0325269
1	2345727	chr1:2345727:G:A	G	A	0.794973	0.0187836
1	2346232	chr1:2346232:A:G	A	G	-0.711657	0.02176
1	2379954	chr1:2379954:A:G	A	G	-0.702924	0.0023294
1	2462084	chr1:2462084:C:A	C	A	-0.567663	0.0249763
1	2462787	chr1:2462787:T:G	T	G	0.677457	0.0150356
1	2562891	chr1:2562891:G:A	G	A	0.813986	0.0395392
1	2906183	chr1:2906183:T:C	T	C	-0.510363	0.0452658
1	2923787	chr1:2923787:A:G	A	G	0.489531	0.0164178
1	2943068	chr1:2943068:G:A	G	A	-0.86691	0.00930077
1	3096581	chr1:3096581:A:C	A	C	-0.981754	0.00667777
1	3146223	chr1:3146223:G:A	G	A	-0.731047	0.000432941
1	3164624	chr1:3164624:G:T	G	T	0.606816	0.0323543
1	3232133	chr1:3232133:T:C	T	C	0.607655	0.0315868
1	3239902	chr1:3239902:A:G	A	G	-0.975005	0.00945929
1	3267043	chr1:3267043:A:G	A	G	1.24539	0.0371676
1	3337051	chr1:3337051:A:G	A	G	-0.689082	0.0349626
1	3401870	chr1:3401870:C:T	C	T	-0.747108	0.0437109
1	3403912	chr1:3403912:G:A	G	A	1.3973	0.0381935
1	3423705	chr1:3423705:C:T	C	T	-0.466941	0.0372697
1	3440451	chr1:3440451:C:T	C	T	0.695516	0.00215148
1	3495402	chr1:3495402:T:C	T	C	-0.545811	0.0371585
1	3542568	chr1:3542568:C:T	C	T	-0.515473	0.0120852
1	3577965	chr1:3577965:A:G	A	G	0.420678	0.0397746
1	3670136	chr1:3670136:G:A	G	A	0.931728	0.0117635
1	3675872	chr1:3675872:T:G	T	G	-0.43187	0.049594
1	3676243	chr1:3676243:G:A	G	A	0.643062	0.0141118
1	3733230	chr1:3733230:A:C	A	C	0.579738	0.0239344
1	3734754	chr1:3734754:A:G	A	G	0.597291	0.00753529
1	3755227	chr1:3755227:A:G	A	G	-0.733338	0.0237159
1	3799355	chr1:3799355:A:G	A	G	-1.3603	0.0148507
1	3806077	chr1:3806077:G:A	G	A	0.437858	0.036874
1	3875491	chr1:3875491:A:G	A	G	-0.477429	0.0479724
1	3892762	chr1:3892762:C:T	C	T	0.537541	0.024205
1	3958719	chr1:3958719:T:G	T	G	0.969987	0.0190028
1	4041637	chr1:4041637:T:C	T	C	-0.926073	0.00431194
1	4043762	chr1:4043762:T:C	T	C	0.427911	0.0366417
1	4091691	chr1:4091691:T:C	T	C	0.507821	0.030828
1	4096118	chr1:4096118:G:A	G	A	-0.890401	0.00708041
1	4121478	chr1:4121478:C:T	C	T	0.71115	0.0306371
1	4183610	chr1:4183610:G:A	G	A	-1.26738	0.040543
1	4208191	chr1:4208191:C:T	C	T	-2.11474	0.00739195
1	4308156	chr1:4308156:C:T	C	T	-1.51375	0.0285728
1	4428771	chr1:4428771:C:T	C	T	-0.472412	0.0237188
1	4450780	chr1:4450780:C:T	C	T	0.859175	0.00434806
1	4522029	chr1:4522029:T:G	T	G	-0.461512	0.0235929
1	4569348	chr1:4569348:T:C	T	C	-0.859069	0.00370356
1	4573579	chr1:4573579:C:T	C	T	-0.805392	0.0234385
1	4628856	chr1:4628856:C:T	C	T	-1.77169	0.040267
1	4644164	chr1:4644164:A:C	A	C	0.743139	0.025825
1	4682716	chr1:4682716:T:C	T	C	-1.31103	0.0205933
1	4694043	chr1:4694043:T:C	T	C	0.494895	0.0319676
1	4706679	chr1:4706679:C:T	C	T	0.935549	0.014191
1	4712657	chr1:4712657:G:A	G	A	-0.609499	0.0182526
1	4726035	chr1:4726035:G:T	G	T	-1.13381	0.0332227
1	4850082	chr1:4850082:A:G	A	G	-0.633664	0.0468868
1	4894715	chr1:4894715:C:A	C	A	0.55469	0.0474366
1	4942110	chr1:4942110:A:G	A	G	0.688159	0.00618085
1	4961113	chr1:4961113:G:A	G	A	0.591205	0.0265188
1	4972077	chr1:4972077:T:C	T	C	0.565567	0.00667219
1	5035802	chr1:5035802:C:T	C	T	0.703417	0.0265701
1	5060263	chr1:5060263:A:G	A	G	0.585309	0.0155531
1	5106473	chr1:5106473:C:T	C	T	-0.877396	0.0113305
1	5152168	chr1:5152168:G:A	G	A	-0.883336	0.00244817
1	5166628	chr1:5166628:A:G	A	G	0.72244	0.0277785
1	5221361	chr1:5221361:T:C	T	C	-0.903841	0.0325793
1	5294784	chr1:5294784:C:T	C	T	0.58542	0.0377855
1	5342810	chr1:5342810:A:G	A	G	0.553542	0.0122908
1	5482609	chr1:5482609:G:A	G	A	0.489266	0.0284262
1	5485345	chr1:5485345:C:T	C	T	-1.15223	0.00122529
1	5534677	chr1:5534677:A:G	A	G	0.829361	0.00329683
1	5578338	chr1:5578338:C:A	C	A	0.500787	0.0301681
1	5579030	chr1:5579030:A:G	A	G	0.482487	0.0199167
1	5579707	chr1:5579707:A:G	A	G	0.979476	0.00221895
1	5585383	chr1:5585383:G:A	G	A	0.633329	0.00709927
1	5602823	chr1:5602823:G:A	G	A	-0.683999	0.0199018
1	5603635	chr1:5603635:C:T	C	T	-0.468618	0.0485107
1	5658338	chr1:5658338:A:G	A	G	-0.62607	0.0047298
1	5664204	chr1:5664204:C:T	C	T	-1.75976	0.0277947
1	5741635	chr1:5741635:G:A	G	A	0.448101	0.0366099
1	5771973	chr1:5771973:T:C	T	C	1.26073	0.0198729
1	5819011	chr1:5819011:G:A	G	A	-0.588144	0.0121557
1	5833292	chr1:5833292:C:A	C	A	0.472609	0.0402307
1	5999262	chr1:5999262:G:A	G	A	0.982116	0.0195573
1	6082664	chr1:6082664:A:G	A	G	0.692424	0.00218652
1	6098972	chr1:6098972:A:G	A	G	-0.529167	0.0131654
1	6134964	chr1:6134964:C:T	C	T	0.584844	0.00480551
1	6170792	chr1:6170792:G:A	G	A	-0.872223	0.0471621
1	6198983	chr1:6198983:G:A	G	A	1.46064	0.0162255
1	6251956	chr1:6251956:C:T	C	T	0.496027	0.0359552
1	6359833	chr1:6359833:A:C	A	C	-0.714932	0.00305284
1	6440085	chr1:6440085:G:T	G	T	0.566053	0.0382916
1	6867692	chr1:6867692:A:G	A	G	0.523765	0.0277549
1	7133460	chr1:7133460:C:A	C	A	0.662561	0.0379989
1	7188495	chr1:7188495:A:G	A	G	-0.577054	0.0304859
1	7296613	chr1:7296613:A:G	A	G	-0.718322	0.0479969
1	7426851	chr1:7426851:G:A	G	A	0.610428	0.0316571
1	7512538	chr1:7512538:A:G	A	G	-0.4649	0.042122
1	7527521	chr1:7527521:G:T	G	T	0.716676	0.0101
1	7641601	chr1:7641601:C:T	C	T	0.68182	0.00528391
1	7734166	chr1:7734166:C:T	C	T	0.663027	0.00414469
1	7774798	chr1:7774798:C:T	C	T	-1.29734	0.0228651
1	7781911	chr1:7781911:G:A	G	A	0.532745	0.0225843
1	7783650	chr1:7783650:A:C	A	C	-0.835653	0.0390826
1	7831037	chr1:7831037:A:C	A	C	1.24577	0.0424414
1	7857765	chr1:7857765:G:A	G	A	0.448479	0.0347239
1	7875235	chr1:7875235:A:C	A	C	-0.682183	0.00207184
1	8127868	chr1:8127868:G:T	G	T	-1.34317	0.0282585
1	8163528	chr1:8163528:C:T	C	T	0.894143	0.00556356
1	8243682	chr1:8243682:A:G	A	G	0.669163	0.01796
1	8265782	chr1:8265782:C:T	C	T	-0.690444	0.0158018
1	8291478	chr1:8291478:G:A	G	A	-0.588735	0.00543317
1	8299862	chr1:8299862:G:A	G	A	-1.18441	0.000583219
1	8311118	chr1:8311118:A:C	A	C	-0.849431	0.0409949
1	8330435	chr1:8330435:A:G	A	G	0.502724	0.0255248
1	8392665	chr1:8392665:T:C	T	C	0.709652	0.0122097
1	8661343	chr1:8661343:G:A	G	A	-0.749451	0.0136255
1	8833441	chr1:8833441:A:G	A	G	-0.569212	0.0133149
1	8920754	chr1:8920754:T:C	T	C	0.5543	0.020214
1	8939310	chr1:8939310:T:G	T	G	-0.616067	0.0271097
1	8979645	chr1:8979645:G:A	G	A	-0.55548	0.0189272
1	9001606	chr1:9001606:C:T	C	T	-0.878747	0.049055
1	9014181	chr1:9014181:C:T	C	T	0.653614	0.0273858
1	9077478	chr1:9077478:C:T	C	T	1.45066	0.0404935
1	9147673	chr1:9147673:C:T	C	T	0.959126	0.000159845
1	9221657	chr1:9221657:G:A	G	A	-0.517725	0.0406926
1	9276592	chr1:9276592:T:C	T	C	0.622985	0.00467889
1	9283562	chr1:9283562:C:T	C	T	-0.493944	0.0306776
1	9301947	chr1:9301947:A:G	A	G	-0.451763	0.0479311
1	9317467	chr1:9317467:G:T	G	T	1.17268	0.0160167
1	9347538	chr1:9347538:G:A	G	A	0.417123	0.0466781
1	9359614	chr1:9359614:A:G	A	G	0.507519	0.0267238
1	9371064	chr1:9371064:T:G	T	G	-0.60062	0.00560754
1	9403442	chr1:9403442:A:G	A	G	-0.721971	0.0165647
1	9422389	chr1:9422389:G:A	G	A	0.638051	0.0309114
1	9475560	chr1:9475560:A:G	A	G	-1.63185	0.0460374
1	9598407	chr1:9598407:T:G	T	G	-0.533873	0.0252392
1	9626325	chr1:9626325:T:C	T	C	0.928922	0.0183448
1	9660438	chr1:9660438:C:T	C	T	0.577605	0.00943079
1	9800886	chr1:9800886:C:T	C	T	0.621647	0.00787271
1	9903286	chr1:9903286:C:T	C	T	0.637142	0.0410944
1	10179139	chr1:10179139:G:A	G	A	0.599969	0.0107371
1	10431152	chr1:10431152:G:A	G	A	-0.654433	0.0225788
1	10485384	chr1:10485384:A:C	A	C	0.987317	0.0167848
1	10506091	chr1:10506091:T:C	T	C	-0.630746	0.00355836
1	10511784	chr1:10511784:C:A	C	A	-0.684204	0.00272699
1	10585891	chr1:10585891:G:A	G	A	-0.747061	0.0475324
1	10623185	chr1:10623185:C:T	C	T	0.992632	0.0372383
1	10776336	chr1:10776336:C:A	C	A	-1.41736	0.00962982
1	10839783	chr1:10839783:C:T	C	T	1.0036	0.0189072
1	10848762	chr1:10848762:G:A	G	A	1.06552	0.0378187
1	10860681	chr1:10860681:T:C	T	C	0.760791	0.0378323
1	10929071	chr1:10929071:T:C	T	C	0.486755	0.0493611
1	10964296	chr1:10964296:A:G	A	G	0.476433	0.0298721
1	11005331	chr1:11005331:C:T	C	T	-0.5629	0.0225649
1	11034982	chr1:11034982:C:T	C	T	-0.607514	0.0344296
1	11485221	chr1:11485221:G:A	G	A	-1.24134	0.0393306
1	11522185	chr1:11522185:C:T	C	T	-0.814303	0.0389181
1	11573799	chr1:11573799:A:G	A	G	0.790321	0.0398257
1	11629606	chr1:11629606:A:G	A	G	0.668419	0.00574031
1	11651151	chr1:11651151:G:A	G	A	0.748541	0.00371857
1	11666625	chr1:11666625:G:A	G	A	-1.00841	0.0153256
1	11687056	chr1:11687056:T:C	T	C	0.547132	0.0214612
1	11855828	chr1:11855828:C:T	C	T	-0.495255	0.0492946
1	11964178	chr1:11964178:C:T	C	T	0.616571	0.00701836
1	12044991	chr1:12044991:T:C	T	C	0.478136	0.0285907
1	12078572	chr1:12078572:A:G	A	G	0.428164	0.0451247
1	12091225	chr1:12091225:G:A	G	A	-0.924144	0.0258881
1	12124693	chr1:12124693:G:A	G	A	0.607142	0.0186857
1	12538055	chr1:12538055:A:G	A	G	-0.53434	0.0146905
1	12559976	chr1:12559976:T:G	T	G	0.718014	0.0182925
1	12577371	chr1:12577371:A:C	A	C	-0.546818	0.0185747
1	12598051	chr1:12598051:A:G	A	G	0.604726	0.0043533
1	12619844	chr1:12619844:T:C	T	C	-0.47078	0.0218024
1	12706919	chr1:12706919:G:A	G	A	0.976838	0.0375403
1	12711278	chr1:12711278:C:T	C	T	-0.520977	0.019349
1	12774110	chr1:12774110:G:A	G	A	-0.760861	0.00326599
1	12808315	chr1:12808315:T:C	T	C	0.406842	0.0490039
1	13466282	chr1:13466282:C:T	C	T	0.479295	0.0299767
1	13485440	chr1:13485440:G:A	G	A	-1.20407	0.00781526
1	13535165	chr1:13535165:T:C	T	C	-0.650826	0.00901588
1	13538033	chr1:13538033:T:C	T	C	0.511355	0.0196175
1	13562221	chr1:13562221:A:G	A	G	-1.2847	0.0129023
1	13562900	chr1:13562900:T:C	T	C	0.554472	0.016512
1	13570368	chr1:13570368:C:T	C	T	0.604715	0.044843
1	13621730	chr1:13621730:C:A	C	A	0.793211	0.00773511
1	13631141	chr1:13631141:C:T	C	T	1.69739	0.0041593
1	13674227	chr1:13674227:T:C	T	C	1.31704	0.0258079
1	13812701	chr1:13812701:T:C	T	C	-0.551942	0.0106693
1	13833717	chr1:13833717:T:C	T	C	-0.472579	0.03523
1	13877561	chr1:13877561:G:T	G	T	0.42674	0.0449084
1	13913797	chr1:13913797:C:T	C	T	-0.98906	0.0347977
1	13924425	chr1:13924425:T:C	T	C	0.567239	0.00872886
1	13936082	chr1:13936082:G:T	G	T	-0.647445	0.0418629
1	13962725	chr1:13962725:G:T	G	T	0.88675	0.00793441
1	13971603	chr1:13971603:T:G	T	G	-0.63747	0.035121
1	13975582	chr1:13975582:G:T	G	T	-1.77443	0.00197032
1	14013733	chr1:14013733:G:T	G	T	0.624605	0.00341604
1	14073803	chr1:14073803:T:C	T	C	-0.676396	0.0254695
1	14153322	chr1:14153322:C:T	C	T	0.417996	0.0452983
1	14167487	chr1:14167487:A:C	A	C	0.600209	0.0068297
1	14365776	chr1:14365776:A:G	A	G	0.614611	0.0356752
1	14367088	chr1:14367088:G:A	G	A	1.17096	0.00509059
1	14406664	chr1:14406664:A:G	A	G	-0.863812	0.0088463
1	14541041	chr1:14541041:A:G	A	G	-0.588563	0.0475695
1	14653647	chr1:14653647:C:T	C	T	0.489793	0.0395196
1	14685868	chr1:14685868:G:A	G	A	0.701551	0.0110019
1	14751820	chr1:14751820:T:C	T	C	1.36677	0.0492222
1	14791744	chr1:14791744:A:C	A	C	-0.607203	0.0118872
1	14798201	chr1:14798201:C:T	C	T	-0.540648	0.0497004
1	14925610	chr1:14925610:G:T	G	T	-0.688349	0.0389627
1	14946249	chr1:14946249:T:C	T	C	0.80546	0.00322729
1	14948467	chr1:14948467:T:G	T	G	-0.878339	0.00676898
1	15027800	chr1:15027800:G:A	G	A	-1.07902	0.0274075
1	15069385	chr1:15069385:A:C	A	C	-1.60934	0.0181265
1	15148818	chr1:15148818:G:A	G	A	0.772313	0.037383
1	15156136	chr1:15156136:C:T	C	T	0.659725	0.0058376
1	15191306	chr1:15191306:C:T	C	T	0.549859	0.0270733
1	15214902	chr1:15214902:C:T	C	T	-1.46118	0.00742626
1	15371788	chr1:15371788:A:G	A	G	0.830732	0.0364039
1	15459700	chr1:15459700:A:G	A	G	0.50071	0.0327839
1	15711831	chr1:15711831:T:C	T	C	0.597047	0.00854936
1	15743433	chr1:15743433:G:A	G	A	-0.766829	0.00654103
1	15798884	chr1:15798884:C:T	C	T	-0.749953	0.0267901
1	16089401	chr1:16089401:C:T	C	T	1.12441	0.0474455
1	16161772	chr1:16161772:C:T	C	T	-0.598202	0.0204034
1	16307111	chr1:16307111:C:T	C	T	-0.739037	0.0345553
1	16434846	chr1:16434846:C:T	C	T	0.781192	0.0432601
1	16454951	chr1:16454951:A:G	A	G	-1.20731	0.034664
1	16986662	chr1:16986662:G:A	G	A	-0.724422	0.00792251
1	17137703	chr1:17137703:A:G	A	G	0.549051	0.012298
1	17206513	chr1:17206513:T:C	T	C	0.678611	0.00254067
1	17232377	chr1:17232377:G:A	G	A	-0.740894	0.0199436
1	17303810	chr1:17303810:G:T	G	T	-0.827443	0.00171192
1	17397632	chr1:17397632:A:G	A	G	0.636559	0.0315726
1	17472484	chr1:17472484:G:T	G	T	0.937411	8.05021e-05
1	17573224	chr1:17573224:C:A	C	A	-1.15295	0.0346588
1	17666127	chr1:17666127:A:G	A	G	0.590211	0.0154191
1	17716324	chr1:17716324:C:T	C	T	-0.539674	0.0244484
1	17909441	chr1:17909441:G:A	G	A	1.18936	0.026491
1	17948316	chr1:17948316:A:G	A	G	-0.469709	0.0387279
1	17979141	chr1:17979141:A:G	A	G	0.867565	0.00278935
1	17988565	chr1:17988565:G:A	G	A	0.566535	0.0346556
1	18013254	chr1:18013254:C:T	C	T	-0.608335	0.0286529
1	18015876	chr1:18015876:G:A	G	A	-0.826465	0.0376744
1	18026601	chr1:18026601:C:T	C	T	0.586296	0.0271268
1	18027206	chr1:18027206:G:A	G	A	-0.702037	0.0384696
1	18127642	chr1:18127642:C:A	C	A	0.781746	0.00728983
1	18144113	chr1:18144113:C:T	C	T	2.31989	0.0302535
1	18154126	chr1:18154126:A:G	A	G	-0.507463	0.0183081
1	18186135	chr1:18186135:C:T	C	T	1.57034	0.0473173
1	18190209	chr1:18190209:C:T	C	T	1.25946	0.031329
1	18195678	chr1:18195678:A:G	A	G	-1.43871	0.0385335
1	18205239	chr1:18205239:G:A	G	A	-0.52653	0.0453143
1	18295911	chr1:18295911:C:T	C	T	0.962136	0.0129408
1	18303656	chr1:18303656:T:C	T	C	0.687402	0.00323823
1	18339394	chr1:18339394:G:A	G	A	-0.677551	0.0226341
1	18342007	chr1:18342007:A:C	A	C	-0.527996	0.0381593
1	18403811	chr1:18403811:T:C	T	C	-0.444024	0.0343457
1	18440319	chr1:18440319:G:A	G	A	-1.89217	0.0181643
1	18452780	chr1:18452780:A:G	A	G	0.566115	0.011936
1	18454992	chr1:18454992:G:A	G	A	0.624487	0.00474742
1	18468387	chr1:18468387:G:T	G	T	-1.13233	0.0305936
1	18485822	chr1:18485822:C:T	C	T	0.742061	0.000747234
1	18501399	chr1:18501399:G:A	G	A	0.678417	0.00306372
1	18513556	chr1:18513556:C:T	C	T	-0.735824	0.0399322
1	18519343	chr1:18519343:C:A	C	A	-2.53726	0.00200597
1	18567915	chr1:18567915:G:A	G	A	-0.904362	0.00443465
1	18593057	chr1:18593057:C:T	C	T	1.71552	0.0340195
1	18649231	chr1:18649231:G:A	G	A	-0.983611	0.0202431
1	18673300	chr1:18673300:C:A	C	A	1.09048	0.0498166
1	18674154	chr1:18674154:T:C	T	C	-0.628334	0.0497317
1	18712692	chr1:18712692:C:T	C	T	1.40519	0.0213541
1	18734159	chr1:18734159:G:A	G	A	-1.14227	0.0230233
1	18743502	chr1:18743502:G:A	G	A	-1.21726	0.00893263
1	18769763	chr1:18769763:T:C	T	C	0.490748	0.0220983
1	18818726	chr1:18818726:G:A	G	A	1.66406	0.0434318
1	18852250	chr1:18852250:G:A	G	A	-0.701203	0.0420646
1	18868010	chr1:18868010:C:T	C	T	-0.639415	0.00409166
1	19130763	chr1:19130763:C:A	C	A	0.45467	0.0295851
1	19147722	chr1:19147722:G:A	G	A	0.908011	0.0155272
1	19353440	chr1:19353440:G:T	G	T	-0.55483	0.0157033
1	19718095	chr1:19718095:T:G	T	G	-1.26244	0.0379431
1	19718335	chr1:19718335:A:C	A	C	-0.702133	0.0030435
1	19728773	chr1:19728773:C:A	C	A	0.567453	0.0448995
1	19730116	chr1:19730116:G:A	G	A	0.630942	0.00584882
1	19743054	chr1:19743054:G:A	G	A	-0.477154	0.0270179
1	19777831	chr1:19777831:C:T	C	T	0.634557	0.00893961
1	19827168	chr1:19827168:T:C	T	C	-0.729119	0.0172412
1	19851536	chr1:19851536:C:T	C	T	-0.573937	0.00496628
1	19859003	chr1:19859003:C:T	C	T	-0.605362	0.0084652
1	19906912	chr1:19906912:A:G	A	G	1.66676	0.0352948
1	19926485	chr1:19926485:T:C	T	C	0.734528	0.00271192
1	19960442	chr1:19960442:G:A	G	A	-0.831895	0.0186961
1	19981549	chr1:19981549:T:C	T	C	-0.976598	0.0190723
1	20012564	chr1:20012564:A:C	A	C	1.58259	0.0477238
1	20166359	chr1:20166359:C:T	C	T	-1.63891	0.0084878
1	20176690	chr1:20176690:G:A	G	A	-0.521815	0.0293108
1	20225579	chr1:20225579:A:G	A	G	-0.605121	0.00475824
1	20279827	chr1:20279827:G:A	G	A	0.438566	0.0381493
1	20355855	chr1:20355855:C:T	C	T	-0.673859	0.0351462
1	20359669	chr1:20359669:T:C	T	C	-0.958382	0.0149028
1	20431699	chr1:20431699:C:A	C	A	0.609725	0.00521848
1	20447469	chr1:20447469:G:T	G	T	1.06458	0.0248693
1	20495041	chr1:20495041:A:C	A	C	0.642313	0.014322
1	20557010	chr1:20557010:A:G	A	G	-0.41341	0.0431088
1	20578250	chr1:20578250:C:T	C	T	-0.444716	0.0333213
1	20609755	chr1:20609755:G:A	G	A	0.521403	0.027117
1	20670062	chr1:20670062:T:C	T	C	0.580999	0.0125996
1	20723025	chr1:20723025:C:T	C	T	0.961055	0.0463866
1	20797797	chr1:20797797:T:C	T	C	0.495111	0.0178345
1	21258092	chr1:21258092:A:G	A	G	-0.559593	0.0498608
1	21399711	chr1:21399711:G:A	G	A	0.570043	0.0155721
1	21528010	chr1:21528010:T:C	T	C	0.792223	0.0307
1	21619903	chr1:21619903:T:C	T	C	0.706143	0.00331306
1	21647397	chr1:21647397:A:G	A	G	0.617473	0.00886847
1	21811705	chr1:21811705:G:A	G	A	0.694269	0.0416413
1	21960114	chr1:21960114:C:T	C	T	2.18897	0.0459784
1	21982000	chr1:21982000:C:T	C	T	0.433583	0.0384946
1	22244969	chr1:22244969:T:C	T	C	-0.56398	0.0119914
1	22526648	chr1:22526648:G:A	G	A	1.64583	0.0389425
1	22549136	chr1:22549136:C:T	C	T	-0.568883	0.0415485
1	22585948	chr1:22585948:A:G	A	G	0.772604	0.00118238
1	22589365	chr1:22589365:C:T	C	T	0.870169	0.0449475
1	22594970	chr1:22594970:A:C	A	C	0.535526	0.0228736
1	22623879	chr1:22623879:G:A	G	A	1.48647	0.0223465
1	22645399	chr1:22645399:A:G	A	G	-1.05773	0.0026147
1	22666018	chr1:22666018:T:C	T	C	0.860372	0.022597
1	22677526	chr1:22677526:G:T	G	T	-0.508375	0.0195002
1	22826790	chr1:22826790:T:C	T	C	0.455015	0.0321083
1	22962087	chr1:22962087:T:G	T	G	0.56585	0.00918628
1	23468421	chr1:23468421:A:G	A	G	-0.871724	0.00325744
1	23502115	chr1:23502115:C:T	C	T	0.59748	0.00566222
1	23509302	chr1:23509302:A:G	A	G	-0.479978	0.0245811
1	23551717	chr1:23551717:A:G	A	G	-0.704713	0.00123789
1	23561390	chr1:23561390:G:A	G	A	0.635717	0.00528632
1	23700410	chr1:23700410:T:C	T	C	0.600727	0.0155171
1	24014432	chr1:24014432:C:A	C	A	-0.79483	0.0481274
1	24065252	chr1:24065252:C:T	C	T	0.602885	0.0165713
1	24091378	chr1:24091378:T:C	T	C	-0.774981	0.000463265
1	24121594	chr1:24121594:G:A	G	A	0.911959	0.0291514
1	24155984	chr1:24155984:G:A	G	A	0.514625	0.0438576
1	24180020	chr1:24180020:A:G	A	G	-0.413685	0.0479328
1	24269208	chr1:24269208:G:A	G	A	-0.488313	0.0244447
1	24386232	chr1:24386232:C:T	C	T	-0.581974	0.015348
1	24499476	chr1:24499476:A:G	A	G	-0.637869	0.0107091
1	24553471	chr1:24553471:C:T	C	T	-0.454745	0.0227591
1	24688318	chr1:24688318:A:G	A	G	-0.47839	0.0230059
1	24857801	chr1:24857801:C:A	C	A	0.644359	0.00665552
1	24913850	chr1:24913850:T:C	T	C	1.17287	0.00732935
1	24946797	chr1:24946797:T:C	T	C	1.13496	0.0426968
1	24971793	chr1:24971793:G:A	G	A	0.616222	0.0130508
1	25019463	chr1:25019463:A:G	A	G	0.619124	0.00368439
1	25037021	chr1:25037021:A:G	A	G	-0.639287	0.0287709
1	25073178	chr1:25073178:C:T	C	T	0.784799	0.0169336
1	25178581	chr1:25178581:A:G	A	G	0.429397	0.0341862
1	25539676	chr1:25539676:T:C	T	C	0.73175	0.0169091
1	25559101	chr1:25559101:G:A	G	A	0.787725	0.000699616
1	25616654	chr1:25616654:C:T	C	T	0.886135	0.00709444
1	25677265	chr1:25677265:A:G	A	G	0.805788	0.0101915
1	25781197	chr1:25781197:C:A	C	A	-0.576842	0.0361856
1	25880753	chr1:25880753:A:G	A	G	0.615577	0.0152689
1	26024891	chr1:26024891:T:C	T	C	-1.2861	0.0458234
1	26360024	chr1:26360024:C:T	C	T	0.674385	0.0446174
1	26836560	chr1:26836560:T:C	T	C	-1.01067	0.0216004
1	27055121	chr1:27055121:T:G	T	G	0.690571	0.00210873
1	27357905	chr1:27357905:G:A	G	A	1.0499	0.0193956
1	27598166	chr1:27598166:G:A	G	A	0.634866	0.00834221
1	27697089	chr1:27697089:C:T	C	T	-0.583968	0.00811564
1	27941358	chr1:27941358:T:G	T	G	0.563489	0.0225968
1	28092302	chr1:28092302:C:T	C	T	0.89767	0.00561475
1	28096336	chr1:28096336:C:T	C	T	-0.548254	0.0348435
1	28106215	chr1:28106215:C:A	C	A	-2.2536	0.0436899
1	28135129	chr1:28135129:C:A	C	A	0.445732	0.0412172
1	28842967	chr1:28842967:G:A	G	A	0.576449	0.0324499
1	28869650	chr1:28869650:T:C	T	C	-0.660473	0.0378631
1	28901130	chr1:28901130:T:C	T	C	0.525391	0.0385076
1	29217288	chr1:29217288:A:C	A	C	-0.583886	0.0161371
1	29245246	chr1:29245246:T:G	T	G	-0.565298	0.0275266
1	29303943	chr1:29303943:C:T	C	T	-0.532115	0.0254818
1	29305270	chr1:29305270:C:T	C	T	-0.669732	0.0448659
1	29316540	chr1:29316540:C:T	C	T	1.27559	0.00310695
1	29354837	chr1:29354837:T:C	T	C	-0.765238	0.0413963
1	29419090	chr1:29419090:A:G	A	G	-0.548886	0.0189174
1	29421536	chr1:29421536:C:T	C	T	0.872003	0.00178393
1	29446538	chr1:29446538:G:A	G	A	-0.513387	0.0193084
1	29453232	chr1:29453232:G:T	G	T	-0.595096	0.010502
1	29467767	chr1:29467767:G:A	G	A	-0.713624	0.00177122
1	29557932	chr1:29557932:C:T	C	T	0.684106	0.0281168
1	29729431	chr1:29729431:T:C	T	C	0.572095	0.0206245
1	29847208	chr1:29847208:G:T	G	T	-0.606348	0.0257865
1	29887015	chr1:29887015:G:A	G	A	-0.551664	0.0262272
1	29899294	chr1:29899294:C:T	C	T	0.892519	0.0455851
1	29913524	chr1:29913524:C:T	C	T	-0.785561	0.00620103
1	29924802	chr1:29924802:C:T	C	T	-0.520869	0.0349004
1	29930623	chr1:29930623:C:T	C	T	-0.50435	0.0211807
1	29951417	chr1:29951417:A:G	A	G	0.526513	0.0240848
1	30087092	chr1:30087092:A:G	A	G	-0.73009	0.0251681
1	30134781	chr1:30134781:T:C	T	C	-0.759424	0.0355957
1	30187992	chr1:30187992:T:G	T	G	0.507991	0.0221518
1	30201639	chr1:30201639:T:C	T	C	-0.660389	0.00531476
1	30220489	chr1:30220489:T:C	T	C	0.886441	0.0402008
1	30299405	chr1:30299405:A:C	A	C	-0.530069	0.0292226
1	30325210	chr1:30325210:T:C	T	C	-1.0112	0.000781792
1	30338745	chr1:30338745:G:A	G	A	-0.65904	0.00646145
1	30366422	chr1:30366422:T:C	T	C	-1.62331	0.0026978
1	30412363	chr1:30412363:C:T	C	T	-0.543262	0.0128708
1	30421321	chr1:30421321:A:G	A	G	0.627839	0.0439878
1	30472639	chr1:30472639:T:C	T	C	-0.620742	0.00740153
1	30487709	chr1:30487709:G:A	G	A	0.65765	0.00395493
1	30510674	chr1:30510674:T:C	T	C	-0.881667	0.00751747
1	30512229	chr1:30512229:T:C	T	C	0.555275	0.0274347
1	30599663	chr1:30599663:A:G	A	G	0.59078	0.0301063
1	30643150	chr1:30643150:T:G	T	G	-0.886519	0.0217832
1	30645884	chr1:30645884:A:G	A	G	-0.604054	0.0086632
1	30709581	chr1:30709581:G:A	G	A	-0.714832	0.00130431
1	30710639	chr1:30710639:C:T	C	T	0.561073	0.030243
1	30746442	chr1:30746442:T:C	T	C	-0.91502	0.012232
1	30805066	chr1:30805066:G:A	G	A	1.09404	0.0154589
1	30826671	chr1:30826671:G:T	G	T	0.702043	0.0178287
1	30844813	chr1:30844813:C:T	C	T	-0.993362	0.00434369
1	30858290	chr1:30858290:A:G	A	G	1.04319	0.0263661
1	30871403	chr1:30871403:A:G	A	G	-0.699221	0.00181384
1	30873210	chr1:30873210:A:G	A	G	-1.41465	0.0375418
1	30882460	chr1:30882460:C:T	C	T	2.00027	0.0102126
1	30893375	chr1:30893375:C:T	C	T	-1.06073	0.0156636
1	30894897	chr1:30894897:G:A	G	A	-1.44676	0.0119827
1	30905128	chr1:30905128:G:T	G	T	-0.484916	0.036023
1	30913116	chr1:30913116:C:T	C	T	1.17071	0.0197422
1	31166273	chr1:31166273:A:G	A	G	0.477293	0.0327813
1	31214927	chr1:31214927:T:C	T	C	-0.755308	0.0121167
1	31292838	chr1:31292838:T:C	T	C	-0.611584	0.0114196
1	31659232	chr1:31659232:G:A	G	A	-0.524308	0.0239202
1	31692773	chr1:31692773:T:C	T	C	-0.790717	0.00349803
1	31739653	chr1:31739653:T:G	T	G	-0.780297	0.00717605
1	31966493	chr1:31966493:T:C	T	C	0.428919	0.0449518
1	31971667	chr1:31971667:T:C	T	C	-0.81134	0.00117817
1	32009560	chr1:32009560:C:T	C	T	0.627092	0.0132655
1	32189554	chr1:32189554:T:G	T	G	0.603166	0.0284311
1	32716437	chr1:32716437:A:G	A	G	-0.454535	0.0409957
1	32738116	chr1:32738116:C:T	C	T	0.601186	0.00760063
1	33026908	chr1:33026908:C:T	C	T	-0.958154	0.0121863
1	33226350	chr1:33226350:A:G	A	G	1.03048	0.00245211
1	33257610	chr1:33257610:G:A	G	A	0.626484	0.00521138
1	33454865	chr1:33454865:T:C	T	C	0.613042	0.0171642
1	33473244	chr1:33473244:A:G	A	G	-1.00414	0.00364568
1	33485702	chr1:33485702:C:T	C	T	0.636069	0.00434735
1	33688215	chr1:33688215:G:A	G	A	-1.00961	0.0339922
1	33712703	chr1:33712703:A:G	A	G	0.755089	0.0228985
1	33724288	chr1:33724288:G:A	G	A	0.925911	0.0494368
1	33745279	chr1:33745279:C:T	C	T	0.590854	0.00765617
1	33747637	chr1:33747637:A:G	A	G	-0.890909	0.0313223
1	33779885	chr1:33779885:T:C	T	C	-0.475761	0.0368087
1	33876798	chr1:33876798:T:G	T	G	-0.463539	0.0451515
1	33925312	chr1:33925312:C:T	C	T	-0.619383	0.01465
1	34006716	chr1:34006716:A:C	A	C	-0.871051	0.0213174
1	34009360	chr1:34009360:A:G	A	G	0.452428	0.0307617
1	34034870	chr1:34034870:C:T	C	T	0.89818	0.0296548
1	34178236	chr1:34178236:A:G	A	G	0.604075	0.0139848
1	34187867	chr1:34187867:A:G	A	G	0.52784	0.0385835
1	34260951	chr1:34260951:G:A	G	A	0.63112	0.0497326
1	34261244	chr1:34261244:G:T	G	T	0.616415	0.00414275
1	34327473	chr1:34327473:C:T	C	T	-0.955886	0.0173881
1	34339812	chr1:34339812:A:G	A	G	0.471402	0.035761
1	34418076	chr1:34418076:C:T	C	T	-0.73906	0.0140046
1	34430538	chr1:34430538:T:C	T	C	-0.480605	0.0241835
1	34449450	chr1:34449450:C:A	C	A	-0.556042	0.0114687
1	34519204	chr1:34519204:C:T	C	T	0.982765	0.0385593
1	34599137	chr1:34599137:A:G	A	G	0.837048	0.0230053
1	34631157	chr1:34631157:C:T	C	T	-0.634705	0.0465223
1	34739223	chr1:34739223:G:T	G	T	-0.57679	0.0485788
1	34751372	chr1:34751372:A:C	A	C	-0.574932	0.00854472
1	34840027	chr1:34840027:G:A	G	A	0.696771	0.0172697
1	34876494	chr1:34876494:G:A	G	A	0.530924	0.0230788
1	34909640	chr1:34909640:T:C	T	C	0.858174	0.0197716
1	34913518	chr1:34913518:T:C	T	C	-0.59372	0.0274755
1	35074845	chr1:35074845:A:G	A	G	-0.482805	0.0240947
1	35336748	chr1:35336748:G:A	G	A	0.873645	0.00950752
1	35579552	chr1:35579552:G:A	G	A	-0.654345	0.0338019
1	35706594	chr1:35706594:G:A	G	A	-0.618592	0.0133736
1	35840166	chr1:35840166:T:G	T	G	0.73297	0.0264389
1	36103377	chr1:36103377:G:A	G	A	-1.18217	0.00634712
1	36120476	chr1:36120476:A:C	A	C	0.636554	0.0133147
1	36528778	chr1:36528778:C:T	C	T	0.547625	0.0315268
1	36569987	chr1:36569987:G:A	G	A	-1.07602	0.0145774
1	36623849	chr1:36623849:T:C	T	C	0.913078	0.00274352
1	36712810	chr1:36712810:C:T	C	T	0.531301	0.0404371
1	36738361	chr1:36738361:G:A	G	A	0.712979	0.00112467
1	36771569	chr1:36771569:A:G	A	G	0.536375	0.0197573
1	36911312	chr1:36911312:T:C	T	C	0.762465	0.000605097
1	36940823	chr1:36940823:T:C	T	C	0.576173	0.00681767
1	36949791	chr1:36949791:A:C	A	C	0.499184	0.0238916
1	36950072	chr1:36950072:T:C	T	C	0.929615	0.0227987
1	36956599	chr1:36956599:A:C	A	C	0.738504	0.00271637
1	37060121	chr1:37060121:T:C	T	C	0.704766	0.0176901
1	37063718	chr1:37063718:G:A	G	A	-0.550584	0.0437281
1	37073872	chr1:37073872:G:A	G	A	-1.07679	0.0363985
1	37187146	chr1:37187146:G:A	G	A	0.499191	0.0247247
1	37225817	chr1:37225817:T:C	T	C	-0.657366	0.0271513
1	37251919	chr1:37251919:G:A	G	A	1.82738	0.00178908
1	37258674	chr1:37258674:C:T	C	T	0.623991	0.0266001
1	37349809	chr1:37349809:C:T	C	T	-0.610645	0.0361086
1	37365708	chr1:37365708:A:G	A	G	-0.494017	0.0190448
1	37478905	chr1:37478905:G:A	G	A	0.593156	0.025211
1	37627605	chr1:37627605:G:A	G	A	-0.802845	0.0248334
1	37642429	chr1:37642429:G:A	G	A	-1.16205	0.0209779
1	37651470	chr1:37651470:T:C	T	C	0.670771	0.0101149
1	37683093	chr1:37683093:A:G	A	G	0.606175	0.0465576
1	37759170	chr1:37759170:C:A	C	A	1.04366	0.0402685
1	37997832	chr1:37997832:C:T	C	T	0.545621	0.0161766
1	38177439	chr1:38177439:T:C	T	C	-0.964851	0.00844066
1	38186600	chr1:38186600:T:C	T	C	1.40047	0.0419614
1	38197487	chr1:38197487:C:A	C	A	-0.766747	0.00815031
1	38211282	chr1:38211282:T:C	T	C	-1.06648	0.00268185
1	38296709	chr1:38296709:G:A	G	A	0.59324	0.0243726
1	38495365	chr1:38495365:C:T	C	T	0.56157	0.0149901
1	38570796	chr1:38570796:C:T	C	T	-1.24712	0.0255757
1	38716458	chr1:38716458:G:A	G	A	0.630369	0.0216762
1	38763234	chr1:38763234:C:T	C	T	1.33079	0.0127138
1	39110949	chr1:39110949:T:G	T	G	8.25043e-14	0.0124053
1	39782627	chr1:39782627:C:A	C	A	0.63133	0.0182581
1	39911059	chr1:39911059:G:A	G	A	0.74783	0.0158707
1	39930542	chr1:39930542:A:G	A	G	-1.0763	0.0450963
1	40302953	chr1:40302953:C:T	C	T	-0.570833	0.0200433
1	40430010	chr1:40430010:G:A	G	A	-1.77028	0.00619959
1	40436537	chr1:40436537:T:C	T	C	1.00187	0.0269579
1	40462209	chr1:40462209:C:T	C	T	0.53878	0.0407274
1	40476033	chr1:40476033:T:G	T	G	-0.961851	0.0147788
1	40552495	chr1:40552495:T:C	T	C	0.431585	0.0398305
1	40689501	chr1:40689501:T:C	T	C	0.494798	0.0468567
1	40835347	chr1:40835347:T:C	T	C	-0.545907	0.0368204
1	41308540	chr1:41308540:A:G	A	G	0.670098	0.0486702
1	41461873	chr1:41461873:G:A	G	A	0.883041	0.00769029
1	41464279	chr1:41464279:T:C	T	C	-0.673377	0.0218707
1	41497010	chr1:41497010:T:G	T	G	-0.670058	0.0395257
1	41533724	chr1:41533724:C:T	C	T	-0.812594	0.0456241
1	41594151	chr1:41594151:T:C	T	C	-1.47383	0.0275266
1	41668182	chr1:41668182:G:A	G	A	0.487334	0.0258237
1	41736208	chr1:41736208:G:A	G	A	-0.444099	0.0328492
1	41794803	chr1:41794803:A:C	A	C	0.859211	0.00876247
1	41865682	chr1:41865682:G:A	G	A	0.504944	0.0257398
1	41905116	chr1:41905116:C:T	C	T	0.41424	0.0474824
1	41952899	chr1:41952899:G:T	G	T	-0.638929	0.0447139
1	42149971	chr1:42149971:T:C	T	C	0.519721	0.0228244
1	42167593	chr1:42167593:A:C	A	C	0.494954	0.0203539
1	42395411	chr1:42395411:C:A	C	A	0.504784	0.0450717
1	42567952	chr1:42567952:G:A	G	A	-0.619481	0.00443864
1	42814089	chr1:42814089:T:C	T	C	1.2863	0.0487092
1	42834164	chr1:42834164:T:C	T	C	0.443149	0.043524
1	42844968	chr1:42844968:A:G	A	G	1.06434	0.00651844
1	43014533	chr1:43014533:A:C	A	C	-0.497699	0.0198328
1	43026410	chr1:43026410:C:T	C	T	-0.782317	0.00322887
1	43145816	chr1:43145816:C:T	C	T	0.826173	0.00169753
1	43242987	chr1:43242987:G:A	G	A	-0.50349	0.0487513
1	43295980	chr1:43295980:C:T	C	T	-0.596769	0.00754063
1	43492530	chr1:43492530:C:T	C	T	0.59129	0.0287218
1	43509093	chr1:43509093:G:T	G	T	0.655592	0.00645423
1	43574242	chr1:43574242:C:T	C	T	0.549635	0.0388175
1	44418232	chr1:44418232:G:A	G	A	-0.615331	0.0237317
1	44430582	chr1:44430582:G:T	G	T	0.710281	0.048385
1	44442292	chr1:44442292:G:A	G	A	0.461308	0.0443235
1	44521859	chr1:44521859:G:A	G	A	2.12838	0.0462752
1	44531642	chr1:44531642:C:T	C	T	0.638692	0.0193935
1	44551350	chr1:44551350:T:G	T	G	0.583006	0.0364579
1	44604222	chr1:44604222:G:A	G	A	-0.606063	0.0261241
1	44609168	chr1:44609168:A:G	A	G	0.962344	0.00589863
1	44616668	chr1:44616668:G:A	G	A	0.436652	0.042535
1	44709455	chr1:44709455:G:A	G	A	0.830846	0.0063821
1	44895528	chr1:44895528:C:A	C	A	-0.448118	0.0355505
1	45739868	chr1:45739868:T:C	T	C	0.553606	0.0154516
1	46358687	chr1:46358687:G:A	G	A	0.679875	0.0347963
1	46399715	chr1:46399715:A:G	A	G	0.542924	0.0164867
1	46460495	chr1:46460495:T:C	T	C	-0.570508	0.00765498
1	46465257	chr1:46465257:C:A	C	A	-0.630102	0.0264773
1	46474620	chr1:46474620:G:A	G	A	-0.747846	0.00201861
1	46490563	chr1:46490563:G:A	G	A	-0.974976	0.0138787
1	46507286	chr1:46507286:A:G	A	G	-0.61469	0.00596274
1	46536050	chr1:46536050:G:A	G	A	-0.886172	0.0161119
1	46747957	chr1:46747957:T:C	T	C	-0.600603	0.0471593
1	46839482	chr1:46839482:A:G	A	G	0.533188	0.0188888
1	47027121	chr1:47027121:T:C	T	C	0.711016	0.00174964
1	47047980	chr1:47047980:C:T	C	T	0.624741	0.0326897
1	47245784	chr1:47245784:T:C	T	C	-0.552794	0.0420859
1	47583733	chr1:47583733:C:T	C	T	0.682067	0.0179941
1	47596003	chr1:47596003:G:A	G	A	-0.904836	0.00117744
1	47596606	chr1:47596606:C:T	C	T	0.54454	0.032868
1	47730371	chr1:47730371:T:C	T	C	0.501614	0.017783
1	47744201	chr1:47744201:A:G	A	G	-0.550142	0.0257888
1	47752769	chr1:47752769:T:C	T	C	-0.673974	0.0126605
1	47821342	chr1:47821342:C:T	C	T	-0.517407	0.0170116
1	47976874	chr1:47976874:G:A	G	A	0.958089	0.024475
1	48018655	chr1:48018655:A:G	A	G	-0.58678	0.00881992
1	48027762	chr1:48027762:A:G	A	G	0.636152	0.0284918
1	48050729	chr1:48050729:G:T	G	T	-0.47781	0.0374101
1	48055815	chr1:48055815:G:A	G	A	0.509791	0.0163809
1	48069620	chr1:48069620:T:C	T	C	0.942671	0.0139718
1	48073998	chr1:48073998:C:A	C	A	-1.11229	0.00111687
1	48090658	chr1:48090658:G:A	G	A	0.510094	0.0378482
1	48157681	chr1:48157681:C:A	C	A	-0.70914	0.00139819
1	48170114	chr1:48170114:G:A	G	A	-0.819712	0.0336613
1	48174126	chr1:48174126:G:T	G	T	0.927269	0.00563176
1	48208783	chr1:48208783:A:G	A	G	0.688429	0.00234098
1	48278243	chr1:48278243:C:A	C	A	-0.490345	0.0395103
1	48536108	chr1:48536108:C:T	C	T	1.42756	0.00212557
1	48559102	chr1:48559102:T:C	T	C	1.96503	0.00476559
1	48735635	chr1:48735635:C:A	C	A	0.779119	0.0488771
1	48739046	chr1:48739046:C:A	C	A	0.408027	0.0404824
1	48943162	chr1:48943162:G:A	G	A	-0.448824	0.0367684
1	49197494	chr1:49197494:C:T	C	T	0.657547	0.00861933
1	49489815	chr1:49489815:T:C	T	C	-0.505188	0.0388773
1	50176272	chr1:50176272:C:T	C	T	-0.463796	0.0447973
1	50440694	chr1:50440694:T:C	T	C	-0.492304	0.028472
1	50908570	chr1:50908570:C:T	C	T	-1.0201	0.00635528
1	51376521	chr1:51376521:G:A	G	A	0.949523	0.033544
1	51857951	chr1:51857951:G:A	G	A	0.806765	0.0415943
1	53090860	chr1:53090860:G:A	G	A	0.463496	0.0413265
1	53096206	chr1:53096206:G:A	G	A	-0.96421	0.0159434
1	53099149	chr1:53099149:T:C	T	C	-0.494645	0.0293222
1	53113911	chr1:53113911:G:A	G	A	-1.03469	0.00142741
1	53121507	chr1:53121507:C:T	C	T	-0.5223	0.0207123
1	53285938	chr1:53285938:C:T	C	T	1.15341	0.0289929
1	53483900	chr1:53483900:A:C	A	C	-0.637668	0.0372089
1	53505239	chr1:53505239:G:A	G	A	-0.586483	0.00676989
1	53506459	chr1:53506459:A:G	A	G	0.53535	0.0323599
1	53550680	chr1:53550680:C:T	C	T	0.805556	0.0057529
1	53559540	chr1:53559540:C:T	C	T	0.481114	0.0258645
1	53589645	chr1:53589645:T:C	T	C	-0.706541	0.0443215
1	53697455	chr1:53697455:A:G	A	G	0.59355	0.00683574
1	53721113	chr1:53721113:A:G	A	G	-0.597612	0.0357102
1	53855232	chr1:53855232:C:T	C	T	-1.12404	0.0452159
1	54229077	chr1:54229077:A:G	A	G	2.2803	0.0390171
1	54270301	chr1:54270301:C:T	C	T	-0.512656	0.0185535
1	54297048	chr1:54297048:T:G	T	G	-0.489544	0.015583
1	54306586	chr1:54306586:G:A	G	A	-1.28913	0.0174448
1	54307178	chr1:54307178:A:G	A	G	1.10542	0.030785
1	54316966	chr1:54316966:C:T	C	T	0.706711	0.0103305
1	54348717	chr1:54348717:C:T	C	T	-0.713667	0.0192186
1	54407436	chr1:54407436:C:T	C	T	-0.523879	0.0386221
1	54566747	chr1:54566747:T:G	T	G	-0.765209	0.0137107
1	54572576	chr1:54572576:G:A	G	A	-0.773051	0.0104277
1	54586398	chr1:54586398:G:A	G	A	-0.765354	0.000565699
1	54634286	chr1:54634286:C:A	C	A	0.450799	0.0362644
1	54718287	chr1:54718287:C:T	C	T	1.04059	0.0262674
1	54718536	chr1:54718536:C:T	C	T	0.60275	0.0075945
1	54804288	chr1:54804288:A:G	A	G	-0.465758	0.0334506
1	54882573	chr1:54882573:C:A	C	A	1.12768	0.0198036
1	55012148	chr1:55012148:C:A	C	A	0.933819	0.0191737
1	55026029	chr1:55026029:T:C	T	C	-0.419331	0.0418158
1	55027046	chr1:55027046:C:T	C	T	0.761466	0.0340301
1	55050835	chr1:55050835:A:G	A	G	0.417428	0.0466567
1	55056468	chr1:55056468:A:G	A	G	0.642244	0.00860099
1	55220555	chr1:55220555:T:G	T	G	0.635465	0.0424589
1	55246795	chr1:55246795:T:C	T	C	-1.36804	0.0491241
1	55355599	chr1:55355599:C:T	C	T	0.968694	0.0218439
1	55374656	chr1:55374656:C:T	C	T	0.914065	0.0257671
1	55488509	chr1:55488509:G:A	G	A	0.557905	0.0294376
1	55576985	chr1:55576985:G:A	G	A	-0.481576	0.0240399
1	55586314	chr1:55586314:C:T	C	T	0.518243	0.0235267
1	55623225	chr1:55623225:C:T	C	T	-0.672399	0.0189893
1	55632003	chr1:55632003:C:T	C	T	0.577163	0.031971
1	55647961	chr1:55647961:T:C	T	C	0.550318	0.0151101
1	55713140	chr1:55713140:G:T	G	T	-0.692838	0.00211849
1	55754756	chr1:55754756:A:G	A	G	-0.472226	0.0238355
1	55823071	chr1:55823071:C:T	C	T	0.622067	0.00478369
1	55874457	chr1:55874457:G:A	G	A	0.473884	0.0406693
1	55942785	chr1:55942785:T:C	T	C	0.421768	0.0414424
1	56035077	chr1:56035077:G:A	G	A	0.526093	0.013294
1	56235286	chr1:56235286:C:T	C	T	0.524203	0.0158173
1	56329507	chr1:56329507:A:G	A	G	-0.741183	0.0401033
1	56338091	chr1:56338091:A:C	A	C	-0.821315	0.0121317
1	56375997	chr1:56375997:A:G	A	G	1.00338	0.0490184
1	56412957	chr1:56412957:C:T	C	T	-0.821315	0.0178854
1	56462770	chr1:56462770:G:T	G	T	0.501366	0.0214319
1	56513404	chr1:56513404:G:A	G	A	-0.559322	0.0359001
1	56580365	chr1:56580365:T:G	T	G	1.38244	0.0169139
1	56760168	chr1:56760168:G:T	G	T	-0.933736	0.0462902
1	56825847	chr1:56825847:A:G	A	G	-1.1671	0.0120563
1	56915312	chr1:56915312:A:G	A	G	-0.515545	0.0367573
1	56939066	chr1:56939066:C:T	C	T	-0.989488	0.0120629
1	56940048	chr1:56940048:C:T	C	T	0.447815	0.044751
1	56942519	chr1:56942519:A:G	A	G	-0.657913	0.0460599
1	57003118	chr1:57003118:G:T	G	T	-1.21092	0.00127147
1	57057756	chr1:57057756:T:C	T	C	-0.648605	0.0300183
1	57101123	chr1:57101123:C:T	C	T	0.899496	0.00821589
1	57186396	chr1:57186396:C:A	C	A	0.60521	0.0244116
1	57330347	chr1:57330347:A:G	A	G	0.443281	0.0349589
1	57406105	chr1:57406105:T:C	T	C	0.639473	0.0229292
1	57414883	chr1:57414883:C:T	C	T	-0.601977	0.00399196
1	57435331	chr1:57435331:G:A	G	A	-0.884095	0.0042115
1	57445985	chr1:57445985:G:A	G	A	-0.561049	0.00633715
1	57507011	chr1:57507011:C:T	C	T	-1.17129	0.0137188
1	57522528	chr1:57522528:G:A	G	A	-1.26813	0.0133107
1	57528404	chr1:57528404:T:C	T	C	-0.41838	0.0449706
1	57567472	chr1:57567472:A:G	A	G	-0.588858	0.0116962
1	57620108	chr1:57620108:G:A	G	A	-0.583738	0.0371559
1	57696698	chr1:57696698:T:C	T	C	-2.0962	0.0132403
1	57773989	chr1:57773989:A:G	A	G	-1.97221	0.00274953
1	57842370	chr1:57842370:A:C	A	C	1.11505	0.00945472
1	57861347	chr1:57861347:T:C	T	C	-0.75584	0.0344005
1	58036995	chr1:58036995:C:A	C	A	-0.419998	0.0440163
1	58183297	chr1:58183297:G:A	G	A	-0.638597	0.0152636
1	58343997	chr1:58343997:A:C	A	C	0.542193	0.0245975
1	58383790	chr1:58383790:A:C	A	C	0.829239	0.00932396
1	58412294	chr1:58412294:T:C	T	C	0.60999	0.0111355
1	58426555	chr1:58426555:G:A	G	A	0.832887	0.0265056
1	58579620	chr1:58579620:G:A	G	A	2.39399	0.0328985
1	58613576	chr1:58613576:T:C	T	C	1.33055	0.0143351
1	58626087	chr1:58626087:C:T	C	T	0.836767	0.0082686
1	58737062	chr1:58737062:G:A	G	A	-0.619203	0.0352792
1	58765136	chr1:58765136:A:G	A	G	1.05418	0.00693048
1	58841151	chr1:58841151:G:A	G	A	0.744847	0.0378001
1	58876993	chr1:58876993:C:A	C	A	0.509346	0.0162323
1	58915464	chr1:58915464:G:A	G	A	-0.607426	0.00523863
1	58967225	chr1:58967225:G:A	G	A	-0.438188	0.0399491
1	59049517	chr1:59049517:T:G	T	G	0.681846	0.00670853
1	59176430	chr1:59176430:G:A	G	A	1.83364	0.0211185
1	59245607	chr1:59245607:G:A	G	A	-1.06504	0.0408973
1	59313583	chr1:59313583:C:T	C	T	0.986153	0.0216138
1	59372114	chr1:59372114:G:A	G	A	0.620211	0.0381362
1	59377477	chr1:59377477:C:T	C	T	0.877141	0.00977136
1	59449426	chr1:59449426:C:T	C	T	0.896053	0.0338104
1	59465586	chr1:59465586:A:G	A	G	0.559522	0.0143504
1	59578364	chr1:59578364:C:T	C	T	-0.617961	0.00773546
1	59646315	chr1:59646315:G:A	G	A	-0.552876	0.0159799
1	59694168	chr1:59694168:C:A	C	A	-0.703826	0.00210995
1	59721519	chr1:59721519:G:A	G	A	1.08783	0.0395916
1	59729227	chr1:59729227:T:C	T	C	-0.424455	0.0476926
1	59756981	chr1:59756981:G:A	G	A	-0.572332	0.027637
1	59974750	chr1:59974750:T:C	T	C	0.48569	0.0319928
1	59975775	chr1:59975775:T:C	T	C	-1.13486	0.0490036
1	60000160	chr1:60000160:T:C	T	C	-1.2385	0.0272839
1	60026032	chr1:60026032:A:G	A	G	-0.832493	0.0356606
1	60075160	chr1:60075160:T:C	T	C	0.580434	0.0179271
1	60148394	chr1:60148394:C:T	C	T	1.47924	0.0165366
1	60272662	chr1:60272662:T:C	T	C	-1.46033	0.035846
1	60527470	chr1:60527470:T:G	T	G	0.770277	0.032359
1	60903641	chr1:60903641:G:A	G	A	-0.457019	0.045705
1	60906652	chr1:60906652:G:A	G	A	0.72989	0.033261
1	60946459	chr1:60946459:T:G	T	G	-0.758096	0.0461296
1	60978896	chr1:60978896:A:G	A	G	-0.951057	0.0163176
1	61000290	chr1:61000290:T:C	T	C	0.677844	0.0197066
1	61011910	chr1:61011910:C:A	C	A	-1.56346	0.0211104
1	61206066	chr1:61206066:T:C	T	C	-1.24619	0.0280335
1	61219124	chr1:61219124:C:T	C	T	-1.42845	0.0470689
1	61219789	chr1:61219789:C:A	C	A	0.827196	0.0326806
1	61314091	chr1:61314091:C:T	C	T	-0.687113	0.024394
1	61437882	chr1:61437882:C:T	C	T	-1.04632	0.0461327
1	61465789	chr1:61465789:C:T	C	T	0.557567	0.0251633
1	61516972	chr1:61516972:C:T	C	T	-0.568983	0.0263817
1	61548692	chr1:61548692:G:T	G	T	0.449385	0.0297062
1	61572449	chr1:61572449:G:A	G	A	-1.06732	0.0166578
1	61623859	chr1:61623859:T:C	T	C	0.570383	0.00782571
1	61706536	chr1:61706536:C:T	C	T	-2.31947	0.00351145
1	61739277	chr1:61739277:A:G	A	G	-1.66509	0.00568794
1	61742665	chr1:61742665:G:A	G	A	0.451037	0.0468543
1	61927722	chr1:61927722:A:G	A	G	0.63889	0.0393571
1	61979004	chr1:61979004:T:C	T	C	0.759124	0.0179924
1	62070797	chr1:62070797:T:C	T	C	0.820687	0.00390719
1	62097882	chr1:62097882:A:C	A	C	0.602958	0.00658687
1	62176712	chr1:62176712:C:T	C	T	-0.535888	0.0365093
1	62177915	chr1:62177915:T:C	T	C	0.566104	0.0100964
1	62183878	chr1:62183878:C:T	C	T	-1.13574	0.0179939
1	62295454	chr1:62295454:G:A	G	A	-0.738405	0.00739647
1	62325107	chr1:62325107:G:T	G	T	-0.667354	0.0121912
1	62353675	chr1:62353675:T:G	T	G	-0.9591	0.025193
1	62477593	chr1:62477593:C:T	C	T	0.740131	0.0416474
1	62866193	chr1:62866193:C:T	C	T	0.6885	0.00803243
1	62992343	chr1:62992343:C:T	C	T	-1.50828	0.0338276
1	62999307	chr1:62999307:C:T	C	T	-0.587409	0.022336
1	63013690	chr1:63013690:C:T	C	T	0.623652	0.0368547
1	63083559	chr1:63083559:C:T	C	T	0.5673	0.043053
1	63162240	chr1:63162240:A:G	A	G	-0.518108	0.0298606
1	63245338	chr1:63245338:A:G	A	G	-0.594071	0.0245351
1	63315469	chr1:63315469:G:A	G	A	-0.786245	0.0429016
1	63332790	chr1:63332790:A:G	A	G	-0.559108	0.0237795
1	63648630	chr1:63648630:T:C	T	C	0.884056	0.0092567
1	63699874	chr1:63699874:A:G	A	G	-0.622468	0.00429328
1	63701566	chr1:63701566:A:G	A	G	-0.541934	0.0204692
1	63701822	chr1:63701822:C:T	C	T	-0.665861	0.029302
1	63727887	chr1:63727887:T:C	T	C	-0.445964	0.0467017
1	63824627	chr1:63824627:A:G	A	G	-0.514012	0.0193586
1	63870396	chr1:63870396:G:A	G	A	-0.487823	0.023748
1	64064720	chr1:64064720:T:C	T	C	-0.661141	0.00481334
1	64131083	chr1:64131083:T:C	T	C	0.479152	0.0246009
1	64286953	chr1:64286953:G:A	G	A	-0.757382	0.0315455
1	64308534	chr1:64308534:C:T	C	T	0.912906	0.0108632
1	64386211	chr1:64386211:T:C	T	C	0.450096	0.041763
1	64638263	chr1:64638263:C:T	C	T	0.461514	0.0332882
1	64672255	chr1:64672255:T:C	T	C	-0.832979	0.00499783
1	64698110	chr1:64698110:T:C	T	C	-0.674735	0.0191522
1	64848397	chr1:64848397:C:T	C	T	0.445304	0.0376229
1	65052744	chr1:65052744:G:A	G	A	1.06771	0.000696879
1	65137380	chr1:65137380:C:T	C	T	-0.665724	0.0268895
1	65147680	chr1:65147680:G:T	G	T	-1.12203	0.0148892
1	65236308	chr1:65236308:C:T	C	T	0.607298	0.0143767
1	65390271	chr1:65390271:G:A	G	A	0.496249	0.0226846
1	65624025	chr1:65624025:A:G	A	G	1.64898	0.017264
1	65700153	chr1:65700153:G:A	G	A	0.497097	0.0311236
1	65865359	chr1:65865359:T:G	T	G	0.606617	0.0211551
1	65926801	chr1:65926801:A:C	A	C	1.00853	0.0283836
1	66086076	chr1:66086076:A:G	A	G	0.812665	0.0288749
1	66121546	chr1:66121546:C:T	C	T	-0.52732	0.0409753
1	66223323	chr1:66223323:C:T	C	T	0.636406	0.0253529
1	66227081	chr1:66227081:T:C	T	C	-0.557738	0.00830613
1	66292292	chr1:66292292:A:G	A	G	0.516289	0.0204405
1	66323580	chr1:66323580:A:G	A	G	0.680111	0.00188684
1	66448215	chr1:66448215:A:C	A	C	-0.530489	0.013667
1	66484234	chr1:66484234:G:A	G	A	-0.745228	0.0301469
1	66521032	chr1:66521032:A:G	A	G	1.10185	0.0297816
1	66631782	chr1:66631782:C:T	C	T	0.501551	0.0202866
1	66641723	chr1:66641723:T:G	T	G	1.07956	0.00448512
1	66757251	chr1:66757251:T:C	T	C	0.592101	0.00923865
1	66832551	chr1:66832551:T:G	T	G	0.559003	0.0146563
1	67039523	chr1:67039523:G:A	G	A	-0.5497	0.0160298
1	67059264	chr1:67059264:A:G	A	G	-1.54229	0.00923083
1	67069741	chr1:67069741:A:G	A	G	0.638122	0.0485659
1	67219760	chr1:67219760:G:A	G	A	-0.439902	0.0411017
1	67302309	chr1:67302309:AG:A	AG	A	1.11182	0.00215718
1	67311338	chr1:67311338:G:T	G	T	-1.27846	0.00255264
1	67327507	chr1:67327507:T:G	T	G	-0.990388	0.0197781
1	67470088	chr1:67470088:A:G	A	G	1.17699	0.00467032
1	67490092	chr1:67490092:C:T	C	T	0.562153	0.0305057
1	67554038	chr1:67554038:T:C	T	C	-0.682915	0.0019654
1	67567481	chr1:67567481:C:T	C	T	0.865973	0.00533759
1	67613492	chr1:67613492:T:C	T	C	-0.731428	0.00405784
1	67624703	chr1:67624703:G:A	G	A	-0.755695	0.00448688
1	67625534	chr1:67625534:C:T	C	T	0.842786	0.000680268
1	67712845	chr1:67712845:T:C	T	C	0.643907	0.0378209
1	67786874	chr1:67786874:T:C	T	C	-1.24729	0.0261612
1	68014988	chr1:68014988:C:T	C	T	0.535654	0.0150463
1	68118765	chr1:68118765:A:G	A	G	0.741945	0.025564
1	68122200	chr1:68122200:T:C	T	C	-0.481207	0.0300481
1	68142320	chr1:68142320:A:G	A	G	-0.516756	0.0170536
1	68195803	chr1:68195803:T:G	T	G	-0.919814	0.0139015
1	68273842	chr1:68273842:G:A	G	A	0.795016	0.0058627
1	68326430	chr1:68326430:C:T	C	T	0.610445	0.00456295
1	68385083	chr1:68385083:T:G	T	G	-0.536599	0.0392447
1	68420816	chr1:68420816:G:A	G	A	0.941164	0.0289161
1	68516652	chr1:68516652:T:C	T	C	-0.530374	0.0225962
1	68532087	chr1:68532087:T:C	T	C	-0.807601	0.0134978
1	68655451	chr1:68655451:T:C	T	C	-0.508469	0.028485
1	68656217	chr1:68656217:T:C	T	C	2.43848	0.0218026
1	68858912	chr1:68858912:C:T	C	T	1.12962	0.0160109
1	68965049	chr1:68965049:A:C	A	C	1.52803	0.00945032
1	68991265	chr1:68991265:G:A	G	A	0.516443	0.0419757
1	69009693	chr1:69009693:T:C	T	C	-0.891212	0.009377
1	69295817	chr1:69295817:A:G	A	G	-0.623831	0.00513655
1	69381908	chr1:69381908:A:G	A	G	1.38317	0.0122968
1	69415386	chr1:69415386:T:C	T	C	0.576158	0.0110056
1	69431329	chr1:69431329:G:A	G	A	0.947296	0.0230726
1	69473205	chr1:69473205:T:C	T	C	0.666398	0.0299724
1	69535561	chr1:69535561:C:A	C	A	-0.783507	0.0225138
1	69610843	chr1:69610843:C:T	C	T	0.972704	0.0380932
1	69657594	chr1:69657594:A:G	A	G	-0.846145	0.00378386
1	69901404	chr1:69901404:T:C	T	C	0.864171	0.00516705
1	70003906	chr1:70003906:A:C	A	C	-0.908537	0.0022037
1	70032093	chr1:70032093:G:A	G	A	-0.759667	0.0139359
1	70033690	chr1:70033690:C:A	C	A	0.795653	0.0118064
1	70325394	chr1:70325394:A:G	A	G	-1.04295	0.00902811
1	70395563	chr1:70395563:G:A	G	A	-0.788587	0.0390104
1	70431448	chr1:70431448:C:T	C	T	0.738833	0.0272446
1	70450876	chr1:70450876:C:T	C	T	-1.75267	0.00374649
1	70483026	chr1:70483026:T:C	T	C	-0.699211	0.0171608
1	70485480	chr1:70485480:G:T	G	T	0.858093	0.00566888
1	70529982	chr1:70529982:C:T	C	T	0.687608	0.00465261
1	70537543	chr1:70537543:A:G	A	G	0.735207	0.00356357
1	70651006	chr1:70651006:A:G	A	G	0.903337	0.0283816
1	70654356	chr1:70654356:T:C	T	C	-1.28892	0.0464734
1	70701370	chr1:70701370:G:A	G	A	-0.743688	0.00697926
1	70940378	chr1:70940378:A:G	A	G	0.677304	0.0314396
1	71021126	chr1:71021126:A:G	A	G	0.86996	0.0135299
1	71296520	chr1:71296520:A:G	A	G	0.790043	0.00811655
1	71466036	chr1:71466036:A:G	A	G	0.559984	0.0153032
1	71574941	chr1:71574941:G:A	G	A	0.540773	0.0324308
1	71758363	chr1:71758363:T:C	T	C	-0.538618	0.0424307
1	71818428	chr1:71818428:G:A	G	A	-0.590711	0.0211876
1	71818922	chr1:71818922:T:C	T	C	0.507465	0.0277217
1	71953948	chr1:71953948:G:A	G	A	0.631684	0.0182431
1	71993183	chr1:71993183:T:C	T	C	-0.48415	0.0393134
1	72111373	chr1:72111373:G:A	G	A	-1.05196	0.016459
1	72111494	chr1:72111494:G:A	G	A	-0.775486	0.000955425
1	72764664	chr1:72764664:C:T	C	T	-0.49641	0.0225272
1	73051392	chr1:73051392:G:A	G	A	0.479412	0.0270707
1	73221636	chr1:73221636:T:C	T	C	0.870214	0.00450257
1	73591415	chr1:73591415:A:C	A	C	-0.666431	0.0114498
1	73705113	chr1:73705113:G:A	G	A	1.12056	0.026272
1	73731215	chr1:73731215:A:G	A	G	-0.512703	0.0217782
1	73774144	chr1:73774144:A:G	A	G	0.684098	0.0136715
1	73946930	chr1:73946930:C:A	C	A	0.695498	0.00380189
1	73979321	chr1:73979321:C:T	C	T	-1.79262	0.0384476
1	74063145	chr1:74063145:C:A	C	A	1.18575	0.0340708
1	74279304	chr1:74279304:A:G	A	G	0.93579	0.010392
1	74468005	chr1:74468005:A:G	A	G	-0.962235	0.0277878
1	74504631	chr1:74504631:A:G	A	G	-1.13979	0.0320888
1	74617758	chr1:74617758:C:T	C	T	-0.763756	0.0438906
1	74808022	chr1:74808022:G:A	G	A	0.446411	0.0420951
1	75030319	chr1:75030319:C:T	C	T	0.512571	0.0449701
1	75035488	chr1:75035488:T:C	T	C	1.27664	0.0442012
1	75089715	chr1:75089715:G:A	G	A	1.082	0.0217753
1	75312861	chr1:75312861:C:T	C	T	0.66277	0.0328434
1	75336110	chr1:75336110:A:G	A	G	0.806512	0.00574157
1	75373635	chr1:75373635:C:T	C	T	0.527821	0.0176631
1	75536519	chr1:75536519:T:C	T	C	-0.751897	0.00850649
1	75688588	chr1:75688588:G:A	G	A	0.72731	0.00237845
1	75972603	chr1:75972603:G:T	G	T	-0.587316	0.00891231
1	76095024	chr1:76095024:C:T	C	T	-0.638846	0.00565015
1	76161085	chr1:76161085:G:A	G	A	-0.518402	0.0206461
1	76254879	chr1:76254879:G:A	G	A	-0.649914	0.010419
1	76304954	chr1:76304954:T:C	T	C	-0.823793	0.0453724
1	76308516	chr1:76308516:G:A	G	A	0.670427	0.0155849
1	76363477	chr1:76363477:C:T	C	T	-1.73556	0.0282558
1	76373851	chr1:76373851:C:T	C	T	1.06341	0.00449322
1	76582287	chr1:76582287:G:T	G	T	0.825937	0.0232449
1	76661137	chr1:76661137:A:G	A	G	0.785103	0.0100053
1	76699459	chr1:76699459:C:T	C	T	0.564039	0.0148065
1	76705890	chr1:76705890:T:C	T	C	-0.837676	0.0349703
1	76793422	chr1:76793422:A:G	A	G	0.873941	0.0332627
1	76971738	chr1:76971738:G:A	G	A	0.963711	0.0499294
1	77258239	chr1:77258239:A:G	A	G	0.542161	0.0372915
1	77299794	chr1:77299794:A:G	A	G	0.734249	0.0479199
1	77483438	chr1:77483438:G:A	G	A	-0.801802	0.00501442
1	77861698	chr1:77861698:T:G	T	G	-1.23686	0.0211391
1	77977080	chr1:77977080:G:A	G	A	-1.18301	0.0154203
1	78086422	chr1:78086422:A:G	A	G	0.449808	0.0412817
1	78128461	chr1:78128461:A:G	A	G	-2.14905	0.0466091
1	78183653	chr1:78183653:G:A	G	A	-0.637462	0.0232322
1	78267544	chr1:78267544:G:A	G	A	-0.681404	0.00693245
1	78287844	chr1:78287844:G:T	G	T	0.533974	0.0336262
1	78350170	chr1:78350170:C:T	C	T	2.48854	0.0330397
1	78434049	chr1:78434049:T:G	T	G	0.586893	0.00885021
1	78471509	chr1:78471509:T:C	T	C	-0.710521	0.00152498
1	78513556	chr1:78513556:T:C	T	C	1.19949	0.0447762
1	78529237	chr1:78529237:T:C	T	C	0.690693	0.014869
1	78544985	chr1:78544985:G:T	G	T	-0.872185	0.0243279
1	78598173	chr1:78598173:C:T	C	T	0.937753	0.00115288
1	78669556	chr1:78669556:C:T	C	T	0.496807	0.0214447
1	78684248	chr1:78684248:A:G	A	G	-0.602419	0.0414501
1	78703949	chr1:78703949:C:T	C	T	-0.532845	0.0168124
1	78769696	chr1:78769696:C:T	C	T	-1.00627	0.0430488
1	78794306	chr1:78794306:C:T	C	T	0.533232	0.0339105
1	78794365	chr1:78794365:T:C	T	C	-0.789186	0.0129256
1	78797345	chr1:78797345:G:A	G	A	0.536454	0.0422985
1	79057950	chr1:79057950:C:T	C	T	0.496793	0.0385614
1	79087092	chr1:79087092:A:G	A	G	0.568451	0.00637186
1	79109957	chr1:79109957:C:A	C	A	0.69133	0.00388735
1	79122119	chr1:79122119:G:T	G	T	-0.504483	0.0452464
1	79128880	chr1:79128880:G:A	G	A	-1.64827	0.0225931
1	79200530	chr1:79200530:C:T	C	T	-0.534157	0.032359
1	79283795	chr1:79283795:G:A	G	A	1.07328	0.0258955
1	79501236	chr1:79501236:C:T	C	T	0.552168	0.00892524
1	79550610	chr1:79550610:T:C	T	C	-0.594821	0.0172817
1	79639973	chr1:79639973:T:C	T	C	0.56054	0.0116446
1	80018321	chr1:80018321:C:A	C	A	-0.942046	0.0367865
1	80214265	chr1:80214265:A:G	A	G	1.75554	0.0311078
1	80216828	chr1:80216828:C:T	C	T	-0.845781	0.0292862
1	80326767	chr1:80326767:T:G	T	G	0.97824	0.04106
1	80431877	chr1:80431877:T:C	T	C	-0.993609	0.0239549
1	80459873	chr1:80459873:G:A	G	A	-1.87808	0.0252805
1	80587979	chr1:80587979:T:C	T	C	-0.444639	0.0420019
1	80592610	chr1:80592610:C:A	C	A	0.604741	0.0196971
1	80650955	chr1:80650955:A:G	A	G	-0.496365	0.0449859
1	80693610	chr1:80693610:C:T	C	T	-1.18664	0.0452491
1	80721144	chr1:80721144:C:A	C	A	-0.624444	0.00807347
1	80871264	chr1:80871264:T:C	T	C	0.64902	0.0370696
1	81001695	chr1:81001695:G:A	G	A	-1.97415	0.0190138
1	81004401	chr1:81004401:A:G	A	G	0.640743	0.0334869
1	81137752	chr1:81137752:C:T	C	T	-0.521577	0.0155522
1	81192146	chr1:81192146:G:A	G	A	-0.509364	0.0365855
1	81304912	chr1:81304912:C:T	C	T	0.614747	0.0208136
1	81308071	chr1:81308071:C:T	C	T	-1.88358	0.0160306
1	81372511	chr1:81372511:G:A	G	A	1.07511	0.00691249
1	81443914	chr1:81443914:T:C	T	C	0.813324	0.0193558
1	81521443	chr1:81521443:G:T	G	T	0.934083	0.00470005
1	81590276	chr1:81590276:C:T	C	T	-0.588344	0.00778232
1	81622396	chr1:81622396:C:A	C	A	-0.638724	0.0274367
1	81633212	chr1:81633212:A:G	A	G	0.551856	0.0156359
1	81662212	chr1:81662212:A:G	A	G	0.829884	0.0345812
1	81709819	chr1:81709819:C:T	C	T	0.749875	0.00341661
1	81716881	chr1:81716881:G:A	G	A	-0.488107	0.0317031
1	82061393	chr1:82061393:G:T	G	T	-0.653893	0.00762134
1	82070790	chr1:82070790:C:T	C	T	0.989953	0.0163182
1	82203720	chr1:82203720:T:C	T	C	-0.826518	0.0228774
1	82326086	chr1:82326086:G:A	G	A	-0.779115	0.012671
1	82334650	chr1:82334650:A:G	A	G	-0.693841	0.00966824
1	82402351	chr1:82402351:G:T	G	T	0.51891	0.0399059
1	82422477	chr1:82422477:A:G	A	G	-0.841712	0.00863107
1	82431475	chr1:82431475:A:C	A	C	-0.827663	0.0341677
1	82500200	chr1:82500200:T:C	T	C	0.507436	0.0294063
1	82612638	chr1:82612638:C:T	C	T	-0.545184	0.0263288
1	82707332	chr1:82707332:C:T	C	T	0.703317	0.021047
1	82720859	chr1:82720859:G:T	G	T	-1.28285	0.0179657
1	83328084	chr1:83328084:C:A	C	A	0.444227	0.0463484
1	83342398	chr1:83342398:A:G	A	G	-0.630413	0.0149516
1	83452946	chr1:83452946:C:T	C	T	-0.484542	0.0493353
1	83588380	chr1:83588380:T:C	T	C	-0.545852	0.027331
1	83647702	chr1:83647702:T:C	T	C	-0.470736	0.0344294
1	83700390	chr1:83700390:C:A	C	A	1.74493	0.00371068
1	83794677	chr1:83794677:G:A	G	A	0.960085	0.00407027
1	84175621	chr1:84175621:A:C	A	C	0.832158	0.00585042
1	84278266	chr1:84278266:T:G	T	G	-0.439839	0.0327985
1	84350904	chr1:84350904:A:C	A	C	-0.460115	0.0448096
1	84380910	chr1:84380910:A:G	A	G	-1.12642	0.0471389
1	84600336	chr1:84600336:T:C	T	C	0.728678	0.0230518
1	84631237	chr1:84631237:A:G	A	G	0.510795	0.0324434
1	84640225	chr1:84640225:A:G	A	G	0.671758	0.0221164
1	84752144	chr1:84752144:A:G	A	G	0.578021	0.0300277
1	84851189	chr1:84851189:A:C	A	C	0.519796	0.0191519
1	84878975	chr1:84878975:T:G	T	G	-0.928582	0.00302811
1	84940211	chr1:84940211:A:G	A	G	1.96493	0.00400199
1	84942933	chr1:84942933:G:T	G	T	0.96995	0.0408712
1	85115598	chr1:85115598:G:A	G	A	-0.586363	0.00750453
1	85136729	chr1:85136729:T:C	T	C	0.690485	0.00271514
1	85246604	chr1:85246604:C:T	C	T	-0.766339	0.0101585
1	85456978	chr1:85456978:C:T	C	T	-0.675468	0.0479128
1	85472878	chr1:85472878:T:C	T	C	-0.594246	0.0298222
1	85512308	chr1:85512308:G:A	G	A	0.834833	0.0165691
1	85539062	chr1:85539062:A:C	A	C	2.55761	0.0198052
1	85709486	chr1:85709486:C:A	C	A	-1.62419	0.0486034
1	85776952	chr1:85776952:C:T	C	T	-0.515735	0.021336
1	85970167	chr1:85970167:T:C	T	C	0.678609	0.00436655
1	86086102	chr1:86086102:C:A	C	A	-0.471187	0.0421041
1	86086543	chr1:86086543:C:T	C	T	-0.653385	0.00720508
1	86118085	chr1:86118085:T:C	T	C	-0.589049	0.0100727
1	86155477	chr1:86155477:A:G	A	G	1.14483	0.000382422
1	86196624	chr1:86196624:C:T	C	T	1.54823	0.00978015
1	86249101	chr1:86249101:T:C	T	C	-1.15317	0.0151371
1	86250406	chr1:86250406:C:T	C	T	-0.542858	0.0212849
1	86427642	chr1:86427642:T:C	T	C	-0.590462	0.0265268
1	86488736	chr1:86488736:T:C	T	C	0.779392	0.0135889
1	86488908	chr1:86488908:T:C	T	C	-1.12119	0.00097752
1	86539719	chr1:86539719:A:C	A	C	-0.492689	0.0300789
1	86674506	chr1:86674506:G:A	G	A	-0.624363	0.010366
1	86998412	chr1:86998412:A:G	A	G	0.670295	0.0185654
1	87074196	chr1:87074196:T:C	T	C	-0.84863	0.00229931
1	87173046	chr1:87173046:C:T	C	T	-0.632588	0.0169261
1	87231864	chr1:87231864:A:G	A	G	0.582192	0.0454183
1	87253392	chr1:87253392:C:T	C	T	0.805579	0.00673381
1	87255968	chr1:87255968:T:C	T	C	-0.811194	0.0213189
1	87415949	chr1:87415949:A:G	A	G	-0.729232	0.00272744
1	87622802	chr1:87622802:A:G	A	G	-0.511886	0.0295166
1	87640823	chr1:87640823:G:A	G	A	0.713934	0.0490331
1	87677267	chr1:87677267:T:G	T	G	0.777546	0.0171174
1	87746754	chr1:87746754:C:T	C	T	1.90924	0.0233095
1	87757394	chr1:87757394:A:G	A	G	-0.48758	0.0314994
1	87816514	chr1:87816514:G:A	G	A	-0.937872	0.0208486
1	87951780	chr1:87951780:C:T	C	T	0.739677	0.0430842
1	87957680	chr1:87957680:C:A	C	A	-0.996609	0.00919519
1	88001745	chr1:88001745:C:T	C	T	-0.559258	0.0151108
1	88145668	chr1:88145668:A:G	A	G	1.00325	0.0193064
1	88166738	chr1:88166738:A:G	A	G	1.43416	0.0359525
1	88386927	chr1:88386927:G:A	G	A	-0.706358	0.0067323
1	88398952	chr1:88398952:T:C	T	C	-1.07432	0.0237944
1	88519949	chr1:88519949:A:C	A	C	-0.687559	0.00552675
1	88568127	chr1:88568127:T:C	T	C	-1.73061	0.0143933
1	88660234	chr1:88660234:A:G	A	G	-0.519653	0.031808
1	88717029	chr1:88717029:T:G	T	G	-0.618446	0.0115193
1	88736290	chr1:88736290:A:C	A	C	0.754208	0.0089176
1	88939838	chr1:88939838:G:A	G	A	-0.912852	0.0225027
1	89123464	chr1:89123464:T:C	T	C	0.626835	0.0364536
1	89284437	chr1:89284437:G:A	G	A	-0.85051	0.0480321
1	89310550	chr1:89310550:A:G	A	G	0.811992	0.00361664
1	89375917	chr1:89375917:T:C	T	C	-0.689744	0.024178
1	89388377	chr1:89388377:G:A	G	A	0.545854	0.0350702
1	89445574	chr1:89445574:T:C	T	C	-0.742617	0.0425146
1	89570227	chr1:89570227:G:A	G	A	-0.757708	0.0339435
1	89708139	chr1:89708139:G:A	G	A	0.561471	0.0144313
1	89806027	chr1:89806027:T:C	T	C	0.932409	0.043992
1	89969226	chr1:89969226:G:A	G	A	-0.674915	0.00930964
1	90076723	chr1:90076723:A:G	A	G	-0.503703	0.0472405
1	90080153	chr1:90080153:T:G	T	G	-1.80353	0.0281212
1	90181314	chr1:90181314:G:A	G	A	-0.741286	0.00224031
1	90344710	chr1:90344710:C:A	C	A	-0.926168	0.000864555
1	90349560	chr1:90349560:T:C	T	C	0.68122	0.0148148
1	90353759	chr1:90353759:T:C	T	C	0.5869	0.014845
1	90460425	chr1:90460425:C:A	C	A	-0.497084	0.037995
1	90582953	chr1:90582953:T:C	T	C	0.814512	0.0467709
1	90632256	chr1:90632256:C:T	C	T	-0.459921	0.0498144
1	90647212	chr1:90647212:T:C	T	C	0.99589	0.0438806
1	90655144	chr1:90655144:C:T	C	T	-0.690154	0.0430401
1	91060134	chr1:91060134:G:A	G	A	2.33642	0.0312108
1	91088052	chr1:91088052:C:T	C	T	-0.572033	0.0261223
1	91093983	chr1:91093983:T:C	T	C	-0.755173	0.00590333
1	91126103	chr1:91126103:G:A	G	A	0.483985	0.0304266
1	91211967	chr1:91211967:G:A	G	A	0.747858	0.00769885
1	91296223	chr1:91296223:A:G	A	G	-1.09675	0.0259097
1	91482544	chr1:91482544:C:T	C	T	-1.41703	0.008632
1	91488393	chr1:91488393:G:A	G	A	0.790753	0.0308778
1	91557188	chr1:91557188:T:G	T	G	-0.429301	0.0493035
1	91565233	chr1:91565233:C:T	C	T	-0.488528	0.0442575
1	91600002	chr1:91600002:C:T	C	T	-0.642635	0.00382877
1	91615294	chr1:91615294:C:A	C	A	0.861751	0.0265334
1	91631593	chr1:91631593:C:T	C	T	0.628941	0.0062446
1	91673629	chr1:91673629:C:T	C	T	-0.44752	0.040743
1	91697363	chr1:91697363:C:T	C	T	-0.774836	0.0348509
1	91735070	chr1:91735070:T:C	T	C	0.543009	0.0221006
1	91738246	chr1:91738246:T:C	T	C	0.799764	0.00187157
1	91812618	chr1:91812618:C:T	C	T	-1.17541	0.0168333
1	91900348	chr1:91900348:G:A	G	A	0.773468	0.000938382
1	92121676	chr1:92121676:A:G	A	G	0.792902	0.000371368
1	92134708	chr1:92134708:A:G	A	G	-1.31944	0.0142733
1	92292450	chr1:92292450:G:A	G	A	0.60578	0.0240283
1	92392152	chr1:92392152:G:A	G	A	0.632658	0.00544715
1	92787447	chr1:92787447:C:T	C	T	0.493396	0.0395453
1	92969168	chr1:92969168:G:A	G	A	0.662727	0.00693667
1	93042625	chr1:93042625:G:A	G	A	-0.628814	0.00899629
1	93164615	chr1:93164615:G:A	G	A	-0.929223	0.00541556
1	93442352	chr1:93442352:T:G	T	G	-0.696786	0.0247698
1	93687538	chr1:93687538:C:T	C	T	-0.841218	0.0247101
1	93739132	chr1:93739132:G:A	G	A	-1.1028	0.0443888
1	93883521	chr1:93883521:A:C	A	C	-0.651982	0.0170933
1	93899409	chr1:93899409:T:C	T	C	1.64574	0.0476721
1	93942026	chr1:93942026:G:A	G	A	0.746486	0.00925909
1	93991011	chr1:93991011:C:T	C	T	0.887538	0.00593658
1	93997074	chr1:93997074:G:A	G	A	0.56002	0.0251501
1	94019935	chr1:94019935:A:G	A	G	-1.17662	0.0255271
1	94036243	chr1:94036243:C:T	C	T	0.523648	0.0426359
1	94048303	chr1:94048303:A:G	A	G	1.30996	0.00613137
1	94059228	chr1:94059228:A:G	A	G	0.504302	0.0296413
1	94095716	chr1:94095716:A:C	A	C	-0.559488	0.0497263
1	94128965	chr1:94128965:A:C	A	C	0.664705	0.0332057
1	94199249	chr1:94199249:A:G	A	G	0.570802	0.042466
1	94223471	chr1:94223471:A:G	A	G	0.641507	0.022339
1	94533941	chr1:94533941:A:G	A	G	-0.474786	0.0347451
1	94546355	chr1:94546355:T:C	T	C	0.512348	0.0339379
1	94560560	chr1:94560560:G:A	G	A	-0.586628	0.0102206
1	94586769	chr1:94586769:A:G	A	G	-0.523307	0.0466733
1	94593923	chr1:94593923:A:G	A	G	-0.635632	0.00357225
1	94600077	chr1:94600077:T:G	T	G	-0.828295	0.00216848
1	94621862	chr1:94621862:T:G	T	G	1.04714	0.0467121
1	94640578	chr1:94640578:G:T	G	T	0.695648	0.00253396
1	94655692	chr1:94655692:A:G	A	G	-0.599146	0.0301566
1	94747279	chr1:94747279:C:T	C	T	-0.928218	0.00187677
1	94766418	chr1:94766418:T:G	T	G	2.17042	0.0471867
1	94828533	chr1:94828533:T:C	T	C	-0.589145	0.0154473
1	94849740	chr1:94849740:T:C	T	C	0.596885	0.042746
1	94850463	chr1:94850463:G:A	G	A	-0.533606	0.02834
1	94875888	chr1:94875888:T:C	T	C	-0.768	0.00132881
1	94888641	chr1:94888641:C:T	C	T	0.570258	0.023242
1	94958761	chr1:94958761:A:G	A	G	0.568659	0.00945167
1	95276431	chr1:95276431:T:C	T	C	-0.538245	0.0317617
1	95494658	chr1:95494658:T:C	T	C	0.594384	0.0168989
1	95687501	chr1:95687501:C:T	C	T	0.622201	0.0114682
1	95760451	chr1:95760451:T:C	T	C	-0.777401	0.0294736
1	95804587	chr1:95804587:A:C	A	C	-0.659131	0.0160658
1	95807808	chr1:95807808:A:G	A	G	-0.498547	0.0314968
1	95999080	chr1:95999080:T:C	T	C	-1.07674	0.00584735
1	96029275	chr1:96029275:G:A	G	A	-1.01521	0.0185983
1	96070163	chr1:96070163:T:C	T	C	0.703381	0.00881949
1	96327932	chr1:96327932:C:T	C	T	0.843307	0.0301556
1	96371374	chr1:96371374:A:G	A	G	0.983209	0.0355415
1	96389789	chr1:96389789:T:C	T	C	1.59341	0.0414281
1	96410001	chr1:96410001:T:C	T	C	-1.53547	0.0319262
1	96525808	chr1:96525808:C:A	C	A	-1.05897	0.0334625
1	96689078	chr1:96689078:T:C	T	C	0.501373	0.040844
1	96858058	chr1:96858058:G:A	G	A	-0.889882	0.0489506
1	97172994	chr1:97172994:G:A	G	A	-0.526222	0.0424472
1	97265070	chr1:97265070:G:A	G	A	-0.59346	0.0271392
1	97405853	chr1:97405853:T:C	T	C	-0.710541	0.0400426
1	97409036	chr1:97409036:A:G	A	G	-0.7511	0.00387452
1	97649417	chr1:97649417:T:C	T	C	-1.16505	0.0193382
1	98017137	chr1:98017137:A:G	A	G	0.742726	0.0375252
1	98179657	chr1:98179657:A:G	A	G	0.779427	0.0264201
1	98448922	chr1:98448922:C:T	C	T	0.602565	0.0206839
1	98471536	chr1:98471536:C:T	C	T	-0.679452	0.0416426
1	98502146	chr1:98502146:A:G	A	G	-0.584597	0.00645726
1	98529104	chr1:98529104:A:G	A	G	-0.749066	0.0484878
1	98707094	chr1:98707094:G:A	G	A	1.94415	0.0120305
1	98791126	chr1:98791126:C:A	C	A	-0.724096	0.00996004
1	98900607	chr1:98900607:T:C	T	C	-0.845576	0.000196062
1	98948080	chr1:98948080:G:A	G	A	-0.586252	0.00639606
1	98958054	chr1:98958054:T:C	T	C	0.724584	0.0447787
1	99007648	chr1:99007648:G:A	G	A	-1.40519	0.0140711
1	99072525	chr1:99072525:G:A	G	A	0.896082	0.0284349
1	99102559	chr1:99102559:A:G	A	G	0.548047	0.0144346
1	99234535	chr1:99234535:G:T	G	T	-0.455542	0.0448721
1	99289254	chr1:99289254:G:A	G	A	2.51641	0.0183503
1	99379498	chr1:99379498:T:C	T	C	-0.630574	0.00366646
1	99487855	chr1:99487855:C:T	C	T	0.687729	0.0356605
1	99554018	chr1:99554018:C:T	C	T	1.18763	0.0116056
1	99650004	chr1:99650004:A:C	A	C	-0.552992	0.0196439
1	99717328	chr1:99717328:C:T	C	T	-0.621688	0.00533625
1	99795084	chr1:99795084:G:T	G	T	-0.863027	0.0459442
1	99860465	chr1:99860465:T:C	T	C	-0.849197	0.0193736
1	99951199	chr1:99951199:T:C	T	C	-0.805495	0.0100846
1	99964361	chr1:99964361:A:G	A	G	1.37554	0.0443488
1	100505853	chr1:100505853:A:G	A	G	-0.540096	0.0181199
1	100561702	chr1:100561702:A:G	A	G	-0.635795	0.0476459
1	100566531	chr1:100566531:G:T	G	T	-0.451199	0.0447497
1	100677883	chr1:100677883:C:T	C	T	-1.05036	0.00804741
1	100734330	chr1:100734330:A:G	A	G	0.821019	0.0333881
1	100907772	chr1:100907772:A:G	A	G	1.95451	0.0150666
1	101231148	chr1:101231148:G:A	G	A	-0.693681	0.0346939
1	101265853	chr1:101265853:A:G	A	G	0.68622	0.0137855
1	101361371	chr1:101361371:A:C	A	C	0.575074	0.0239991
1	101419812	chr1:101419812:G:T	G	T	-1.19702	0.0456886
1	101452159	chr1:101452159:A:C	A	C	0.719573	0.0190143
1	101477471	chr1:101477471:G:A	G	A	-1.04815	0.0366145
1	101537133	chr1:101537133:G:A	G	A	0.687002	0.00390583
1	101581668	chr1:101581668:T:C	T	C	0.657079	0.0046985
1	102009625	chr1:102009625:C:T	C	T	1.07218	0.00621809
1	102072804	chr1:102072804:T:G	T	G	-1.22744	0.00698076
1	102141682	chr1:102141682:T:C	T	C	1.94808	0.012668
1	102251420	chr1:102251420:T:C	T	C	-0.757713	0.0189388
1	102359017	chr1:102359017:A:G	A	G	0.589108	0.0112267
1	102455234	chr1:102455234:C:T	C	T	-0.511519	0.0368657
1	102824375	chr1:102824375:C:T	C	T	-0.700502	0.0254604
1	103319369	chr1:103319369:T:C	T	C	-1.10814	0.00739312
1	103347535	chr1:103347535:T:C	T	C	0.694992	0.0265672
1	103443357	chr1:103443357:T:C	T	C	-1.57225	0.0485248
1	103555063	chr1:103555063:C:T	C	T	0.524661	0.0200305
1	103580909	chr1:103580909:A:G	A	G	-0.949354	0.0447622
1	103929762	chr1:103929762:G:A	G	A	-0.849859	0.0186444
1	103931394	chr1:103931394:T:G	T	G	-0.448622	0.0371741
1	103976173	chr1:103976173:A:G	A	G	0.528638	0.0158982
1	104130484	chr1:104130484:A:C	A	C	2.09863	0.0489836
1	104196544	chr1:104196544:C:T	C	T	-0.994074	0.0374147
1	104198948	chr1:104198948:C:T	C	T	1.2449	0.0479304
1	104309788	chr1:104309788:C:T	C	T	0.615532	0.00429796
1	104310536	chr1:104310536:A:G	A	G	1.03311	0.0168342
1	104319107	chr1:104319107:C:A	C	A	2.02538	0.0102223
1	104395220	chr1:104395220:C:T	C	T	0.483203	0.0326494
1	104557120	chr1:104557120:C:T	C	T	0.630388	0.0166238
1	104625013	chr1:104625013:C:T	C	T	-0.648221	0.0201771
1	104652991	chr1:104652991:G:A	G	A	0.926637	0.0150474
1	104653523	chr1:104653523:T:C	T	C	-0.640538	0.0274493
1	104865481	chr1:104865481:G:A	G	A	0.612936	0.00708787
1	105019954	chr1:105019954:C:A	C	A	1.38785	0.0104548
1	105060547	chr1:105060547:A:G	A	G	-0.490718	0.0254433
1	105087320	chr1:105087320:G:A	G	A	0.507704	0.0490565
1	105282939	chr1:105282939:A:C	A	C	-0.594472	0.0104844
1	105342139	chr1:105342139:C:A	C	A	0.609502	0.0108828
1	105752112	chr1:105752112:T:G	T	G	0.447925	0.0484591
1	106043496	chr1:106043496:T:C	T	C	-0.682813	0.0353839
1	106096643	chr1:106096643:C:T	C	T	-1.03984	0.00780045
1	106197010	chr1:106197010:A:C	A	C	0.419959	0.0477668
1	106429753	chr1:106429753:C:A	C	A	0.490905	0.0207146
1	106637674	chr1:106637674:C:A	C	A	-0.423826	0.0451271
1	106759781	chr1:106759781:T:C	T	C	-0.660461	0.00887228
1	106862309	chr1:106862309:G:A	G	A	-0.552794	0.0253941
1	107381714	chr1:107381714:C:A	C	A	-0.609912	0.0242729
1	107396079	chr1:107396079:T:C	T	C	-0.701501	0.00457263
1	107473709	chr1:107473709:T:C	T	C	-0.667267	0.0225058
1	107532786	chr1:107532786:A:G	A	G	0.58547	0.0138804
1	107552813	chr1:107552813:C:T	C	T	-0.735948	0.0104491
1	107727331	chr1:107727331:A:C	A	C	2.62006	0.0134156
1	107746033	chr1:107746033:A:G	A	G	-0.52149	0.024344
1	107893466	chr1:107893466:A:G	A	G	-0.578839	0.0313773
1	107905511	chr1:107905511:A:C	A	C	-2.21498	0.041071
1	108100042	chr1:108100042:G:A	G	A	0.713535	0.0484818
1	108124603	chr1:108124603:T:G	T	G	-0.503963	0.0394029
1	108821543	chr1:108821543:C:A	C	A	-0.554834	0.0188867
1	109103436	chr1:109103436:T:C	T	C	-1.30397	0.049904
1	109150268	chr1:109150268:C:T	C	T	-0.416741	0.0488045
1	109184486	chr1:109184486:T:G	T	G	-0.636718	0.0456258
1	109278966	chr1:109278966:G:A	G	A	-1.03127	0.0472522
1	109292765	chr1:109292765:T:G	T	G	-0.686285	0.00707945
1	109532986	chr1:109532986:G:A	G	A	-0.654359	0.00421122
1	109534434	chr1:109534434:T:C	T	C	1.22723	0.00118243
1	109580215	chr1:109580215:G:A	G	A	-1.22729	0.0202741
1	109653057	chr1:109653057:G:A	G	A	-0.607212	0.0233894
1	109740350	chr1:109740350:G:T	G	T	0.620909	0.0446248
1	109775773	chr1:109775773:C:T	C	T	-0.523276	0.0353961
1	109813390	chr1:109813390:T:G	T	G	0.579508	0.0335305
1	109930334	chr1:109930334:T:G	T	G	0.447501	0.0436043
1	109961738	chr1:109961738:C:T	C	T	-0.542909	0.015839
1	110141108	chr1:110141108:T:C	T	C	0.635853	0.0365216
1	110227601	chr1:110227601:G:T	G	T	-0.629201	0.0199427
1	110249909	chr1:110249909:T:C	T	C	0.78434	0.00536798
1	110271776	chr1:110271776:A:G	A	G	-0.529873	0.0122356
1	110305159	chr1:110305159:T:C	T	C	-1.18967	0.0231613
1	110308736	chr1:110308736:T:C	T	C	0.449876	0.0393624
1	110438215	chr1:110438215:A:G	A	G	-1.42055	0.00830527
1	110486057	chr1:110486057:G:A	G	A	-0.569783	0.0113972
1	110497613	chr1:110497613:G:A	G	A	-0.732922	0.001222
1	110502316	chr1:110502316:G:A	G	A	-0.612663	0.00851032
1	110513767	chr1:110513767:T:C	T	C	-0.782078	0.0227079
1	110519427	chr1:110519427:C:T	C	T	0.869268	0.0273841
1	110568527	chr1:110568527:A:C	A	C	0.722809	0.0432865
1	110592476	chr1:110592476:A:G	A	G	0.638354	0.00462666
1	110707997	chr1:110707997:A:C	A	C	0.701639	0.0150537
1	110714457	chr1:110714457:A:G	A	G	-2.22407	0.00379562
1	110771350	chr1:110771350:C:T	C	T	-0.483079	0.0421878
1	110827875	chr1:110827875:T:C	T	C	0.642539	0.00472005
1	111086949	chr1:111086949:G:A	G	A	-1.12775	0.000907884
1	111095764	chr1:111095764:G:A	G	A	1.68545	0.00456895
1	111130734	chr1:111130734:A:G	A	G	-0.758752	0.0105452
1	111245633	chr1:111245633:G:A	G	A	0.782472	0.0124189
1	111343682	chr1:111343682:T:C	T	C	0.646154	0.0424952
1	111398968	chr1:111398968:G:A	G	A	-0.810546	0.0202496
1	111413984	chr1:111413984:G:A	G	A	0.722447	0.0201637
1	111419833	chr1:111419833:C:T	C	T	-0.519681	0.0167545
1	111544716	chr1:111544716:C:A	C	A	0.490275	0.0278072
1	111592572	chr1:111592572:T:G	T	G	0.472632	0.0313742
1	111731986	chr1:111731986:C:T	C	T	0.929043	0.0277498
1	111738052	chr1:111738052:C:T	C	T	0.527964	0.0226049
1	111775862	chr1:111775862:A:G	A	G	0.664794	0.0109248
1	111841710	chr1:111841710:G:A	G	A	-0.773563	0.0105402
1	111875317	chr1:111875317:T:C	T	C	-0.56975	0.0463914
1	111897435	chr1:111897435:T:C	T	C	1.58537	0.0205196
1	111934742	chr1:111934742:T:C	T	C	0.453034	0.0480034
1	111955120	chr1:111955120:A:G	A	G	-0.903489	0.00923932
1	111970581	chr1:111970581:T:C	T	C	0.543159	0.0390516
1	112061711	chr1:112061711:C:T	C	T	0.687358	0.0192125
1	112125136	chr1:112125136:T:C	T	C	-0.737277	0.00547315
1	112192377	chr1:112192377:C:T	C	T	-0.472769	0.02673
1	112387384	chr1:112387384:A:C	A	C	-0.628208	0.0102262
1	112484071	chr1:112484071:A:G	A	G	0.447254	0.0354186
1	112680472	chr1:112680472:C:T	C	T	-0.525592	0.015224
1	112726010	chr1:112726010:G:A	G	A	-1.00342	0.0444931
1	112738589	chr1:112738589:C:T	C	T	-2.70472	0.0471372
1	112784938	chr1:112784938:G:A	G	A	0.597315	0.0370688
1	113247826	chr1:113247826:A:C	A	C	-0.519988	0.0454235
1	113397649	chr1:113397649:C:T	C	T	-1.71317	0.0497541
1	113514389	chr1:113514389:T:C	T	C	-1.52473	0.0273089
1	113772871	chr1:113772871:C:T	C	T	0.511902	0.0458579
1	114003596	chr1:114003596:C:T	C	T	3.60073e-13	0.011388
1	114048357	chr1:114048357:A:G	A	G	0.49178	0.0383351
1	114092748	chr1:114092748:G:A	G	A	-0.514481	0.0254681
1	114098298	chr1:114098298:G:A	G	A	-1.19259	0.0372247
1	114126615	chr1:114126615:C:T	C	T	0.630609	0.00386379
1	114189098	chr1:114189098:G:T	G	T	0.506875	0.0228652
1	114944057	chr1:114944057:A:G	A	G	-2.06352	0.00856364
1	115032762	chr1:115032762:A:C	A	C	0.571855	0.00967447
1	115309383	chr1:115309383:C:T	C	T	-0.558283	0.0172684
1	115343321	chr1:115343321:G:A	G	A	0.589931	0.00832123
1	115364388	chr1:115364388:T:G	T	G	1.58996	0.0468533
1	115378803	chr1:115378803:T:G	T	G	-1.00419	0.00320184
1	115381100	chr1:115381100:T:C	T	C	0.79001	0.00370774
1	115461590	chr1:115461590:G:T	G	T	-1.18998	0.0486956
1	115490628	chr1:115490628:C:T	C	T	0.481866	0.0315078
1	115597618	chr1:115597618:G:A	G	A	-0.568482	0.00826566
1	115695883	chr1:115695883:C:T	C	T	-0.507429	0.0425192
1	115711593	chr1:115711593:A:G	A	G	-0.566937	0.0128064
1	115811529	chr1:115811529:A:G	A	G	-1.06829	0.0348599
1	115893878	chr1:115893878:A:C	A	C	-0.609184	0.0159797
1	116168481	chr1:116168481:C:T	C	T	-1.30681	0.0140475
1	116169775	chr1:116169775:A:G	A	G	0.468675	0.0216021
1	116259766	chr1:116259766:A:G	A	G	-0.824832	0.00470437
1	116353771	chr1:116353771:G:A	G	A	0.516499	0.0439492
1	116490008	chr1:116490008:C:T	C	T	-0.742902	0.0135526
1	116573246	chr1:116573246:T:C	T	C	0.955721	0.0113021
1	116603502	chr1:116603502:T:C	T	C	-1.25944	0.000271861
1	116712804	chr1:116712804:G:A	G	A	-0.632573	0.02967
1	116728946	chr1:116728946:T:C	T	C	-1.58247	0.00377696
1	116751141	chr1:116751141:T:G	T	G	-0.791048	0.00240007
1	116755162	chr1:116755162:A:G	A	G	-0.637441	0.037686
1	116815841	chr1:116815841:C:T	C	T	-2.17456	0.0429224
1	117179265	chr1:117179265:C:A	C	A	-0.638056	0.00491032
1	117229869	chr1:117229869:A:C	A	C	-0.519709	0.00993671
1	117311291	chr1:117311291:A:G	A	G	-0.487643	0.0312503
1	117333815	chr1:117333815:T:G	T	G	-0.597157	0.00718235
1	117566237	chr1:117566237:T:G	T	G	0.486435	0.0427
1	117594202	chr1:117594202:T:C	T	C	-0.480555	0.0363636
1	117596409	chr1:117596409:G:A	G	A	0.963972	0.00363428
1	117691224	chr1:117691224:C:T	C	T	-0.539064	0.0134131
1	117949904	chr1:117949904:G:A	G	A	0.47517	0.0300547
1	117978961	chr1:117978961:T:G	T	G	-1.01738	0.0113514
1	118117242	chr1:118117242:T:G	T	G	-0.885883	0.00904481
1	118304044	chr1:118304044:A:G	A	G	-2.67232	0.0127397
1	118369922	chr1:118369922:T:C	T	C	2.02344	0.011086
1	118457755	chr1:118457755:G:T	G	T	-0.982925	0.0295537
1	118533115	chr1:118533115:T:G	T	G	-1.21943	0.0127802
1	118767950	chr1:118767950:C:T	C	T	0.739403	0.0245105
1	118799732	chr1:118799732:T:C	T	C	0.571873	0.0150668
1	118864137	chr1:118864137:A:G	A	G	-0.492479	0.0373648
1	118905694	chr1:118905694:G:T	G	T	1.08907	0.004968
1	118915592	chr1:118915592:C:T	C	T	0.858525	0.0108905
1	119242835	chr1:119242835:T:C	T	C	0.494755	0.029519
1	119321022	chr1:119321022:T:C	T	C	0.598997	0.00716614
1	119351305	chr1:119351305:C:T	C	T	-0.461838	0.0453421
1	119472300	chr1:119472300:G:A	G	A	-0.953493	0.0150406
1	119624772	chr1:119624772:T:C	T	C	-0.514418	0.0154841
1	119732979	chr1:119732979:G:A	G	A	-0.574145	0.0210364
1	119750546	chr1:119750546:T:C	T	C	1.19651	0.0239434
1	119764937	chr1:119764937:C:A	C	A	0.503674	0.0211887
1	119875876	chr1:119875876:G:T	G	T	-0.472294	0.036448
1	120144552	chr1:120144552:A:G	A	G	1.43469	0.0327195
1	121233852	chr1:121233852:C:A	C	A	1.00986	0.0427317
1	147112438	chr1:147112438:G:A	G	A	0.565427	0.0227777
1	147404381	chr1:147404381:A:G	A	G	0.847505	0.00260627
1	147554412	chr1:147554412:C:T	C	T	-1.05648	0.019512
1	147588435	chr1:147588435:C:T	C	T	-0.651193	0.00306581
1	147683392	chr1:147683392:G:T	G	T	-8.22925e-14	0.0206528
1	147698292	chr1:147698292:G:A	G	A	-0.479221	0.0337278
1	147704362	chr1:147704362:G:A	G	A	-0.838416	0.000158928
1	147721871	chr1:147721871:T:G	T	G	0.555601	0.0427056
1	147751014	chr1:147751014:A:C	A	C	0.654834	0.0456486
1	147874639	chr1:147874639:C:T	C	T	-0.476908	0.0289041
1	147907814	chr1:147907814:A:G	A	G	0.643963	0.0451944
1	147910368	chr1:147910368:A:C	A	C	0.875254	0.00851925
1	148278103	chr1:148278103:A:G	A	G	0.429657	0.0437792
1	148332202	chr1:148332202:G:A	G	A	0.88708	0.01727
1	150990810	chr1:150990810:C:T	C	T	0.616943	0.0458694
1	151538633	chr1:151538633:T:C	T	C	0.876633	0.0178208
1	151539950	chr1:151539950:T:C	T	C	-0.736041	0.0040936
1	151574777	chr1:151574777:C:T	C	T	-0.941286	0.00857945
1	151620983	chr1:151620983:C:T	C	T	1.20169	0.00234786
1	151756725	chr1:151756725:A:G	A	G	1.22004	0.00401285
1	151858297	chr1:151858297:G:A	G	A	1.55886	0.00769522
1	151874650	chr1:151874650:T:C	T	C	0.500551	0.0392299
1	151962001	chr1:151962001:C:T	C	T	1.01121	0.0121371
1	152167540	chr1:152167540:G:A	G	A	0.583001	0.00997446
1	152460870	chr1:152460870:C:T	C	T	-0.453546	0.0485777
1	152617648	chr1:152617648:C:T	C	T	-1.05288	0.0369562
1	152773239	chr1:152773239:C:T	C	T	-0.467518	0.034489
1	152943402	chr1:152943402:A:G	A	G	0.808739	0.0229114
1	153085345	chr1:153085345:A:G	A	G	-0.603725	0.0185031
1	153244867	chr1:153244867:A:G	A	G	-0.496516	0.0498894
1	153353478	chr1:153353478:A:G	A	G	-0.494621	0.031707
1	153417726	chr1:153417726:G:T	G	T	-0.876917	0.0165265
1	153651002	chr1:153651002:A:G	A	G	-0.608647	0.00815493
1	153780603	chr1:153780603:T:C	T	C	1.3746	0.0240879
1	154260540	chr1:154260540:G:A	G	A	-0.518206	0.0241723
1	154407943	chr1:154407943:C:A	C	A	0.617012	0.0319844
1	154416192	chr1:154416192:T:C	T	C	0.450885	0.0316614
1	154523199	chr1:154523199:C:T	C	T	-0.541056	0.0132273
1	154677112	chr1:154677112:G:A	G	A	-0.618213	0.0053893
1	154711158	chr1:154711158:C:A	C	A	1.05508	0.0437991
1	154738750	chr1:154738750:C:A	C	A	0.409221	0.0491275
1	154753766	chr1:154753766:T:C	T	C	-0.534717	0.0124519
1	154784797	chr1:154784797:C:T	C	T	-0.514339	0.0199867
1	154793624	chr1:154793624:C:T	C	T	-0.570591	0.0102381
1	154811103	chr1:154811103:C:T	C	T	-0.434098	0.0494867
1	154814660	chr1:154814660:T:C	T	C	0.767987	0.00150928
1	154829845	chr1:154829845:C:T	C	T	-0.570562	0.0305386
1	155054395	chr1:155054395:G:T	G	T	-0.725258	0.0187456
1	156232129	chr1:156232129:G:A	G	A	-0.584789	0.0257001
1	156373816	chr1:156373816:T:C	T	C	2.32884	0.0312656
1	156382560	chr1:156382560:G:A	G	A	0.425006	0.0473035
1	156624864	chr1:156624864:C:A	C	A	0.923636	0.0152835
1	156691219	chr1:156691219:T:G	T	G	-1.59471	0.0220997
1	156827023	chr1:156827023:C:T	C	T	-0.539101	0.0300296
1	156855009	chr1:156855009:G:A	G	A	0.561336	0.012873
1	156872544	chr1:156872544:C:T	C	T	-1.04606	0.00718385
1	156913701	chr1:156913701:G:A	G	A	-0.966111	0.0457839
1	157096955	chr1:157096955:T:C	T	C	-0.53148	0.0333966
1	157232664	chr1:157232664:A:G	A	G	-0.569965	0.0439585
1	157373204	chr1:157373204:A:G	A	G	-1.22289	0.0172468
1	157379436	chr1:157379436:A:G	A	G	0.616732	0.0275341
1	157486470	chr1:157486470:A:G	A	G	1.02741	0.0432898
1	157510525	chr1:157510525:G:A	G	A	1.13033	0.00394259
1	157819468	chr1:157819468:T:C	T	C	-0.633065	0.0194528
1	157922301	chr1:157922301:G:A	G	A	-0.464211	0.046686
1	157934300	chr1:157934300:T:C	T	C	0.442488	0.0468152
1	157993183	chr1:157993183:C:T	C	T	0.676976	0.0283738
1	158030339	chr1:158030339:A:G	A	G	-2.22397	0.0433909
1	158086181	chr1:158086181:G:A	G	A	1.30213	0.0175806
1	158103464	chr1:158103464:G:T	G	T	-0.684345	0.0125362
1	158194998	chr1:158194998:A:G	A	G	-0.693233	0.0100778
1	158239144	chr1:158239144:G:A	G	A	1.68877	0.0118116
1	158270827	chr1:158270827:A:G	A	G	0.579026	0.0416764
1	158610279	chr1:158610279:C:T	C	T	-0.503898	0.0493209
1	158679639	chr1:158679639:A:G	A	G	0.449078	0.0389729
1	158770872	chr1:158770872:A:G	A	G	0.4796	0.0422333
1	158811069	chr1:158811069:G:T	G	T	0.700858	0.022858
1	158848404	chr1:158848404:A:G	A	G	0.757246	0.0125743
1	158937449	chr1:158937449:T:C	T	C	0.763967	0.0202216
1	158954951	chr1:158954951:C:A	C	A	-1.40781	0.0172733
1	159069435	chr1:159069435:C:A	C	A	0.661364	0.00271108
1	159074792	chr1:159074792:A:C	A	C	0.762129	0.00108583
1	159077008	chr1:159077008:G:T	G	T	0.801087	0.0281962
1	159158252	chr1:159158252:T:C	T	C	1.4342	0.0404527
1	159225048	chr1:159225048:A:G	A	G	0.700346	0.0296584
1	159285076	chr1:159285076:G:T	G	T	-1.28674	0.016525
1	159412080	chr1:159412080:A:G	A	G	0.875694	0.0476575
1	159633611	chr1:159633611:T:G	T	G	-2.3571	0.0303817
1	159832837	chr1:159832837:A:C	A	C	0.581271	0.00770544
1	159879516	chr1:159879516:T:C	T	C	0.547883	0.0143164
1	159883383	chr1:159883383:C:A	C	A	0.810219	0.00114845
1	159938603	chr1:159938603:A:G	A	G	0.644092	0.00184186
1	159943598	chr1:159943598:G:A	G	A	-0.698708	0.00257218
1	159968779	chr1:159968779:G:A	G	A	-0.504447	0.0272506
1	160127525	chr1:160127525:C:A	C	A	1.66627	0.0389615
1	160408190	chr1:160408190:G:A	G	A	0.683233	0.017344
1	160424383	chr1:160424383:A:G	A	G	-0.859938	0.000338941
1	160460679	chr1:160460679:T:G	T	G	0.749968	0.0010756
1	160488820	chr1:160488820:A:G	A	G	0.563933	0.0137595
1	160502349	chr1:160502349:A:G	A	G	0.650647	0.03628
1	160617331	chr1:160617331:A:C	A	C	0.466501	0.0377553
1	160683509	chr1:160683509:G:A	G	A	-0.556056	0.0162108
1	160698367	chr1:160698367:G:T	G	T	0.994589	0.0171268
1	160740862	chr1:160740862:C:T	C	T	0.780967	0.0432907
1	160855916	chr1:160855916:T:C	T	C	-0.532453	0.0231854
1	160892811	chr1:160892811:T:C	T	C	0.630921	0.0024474
1	160903377	chr1:160903377:C:T	C	T	0.70361	0.0457773
1	160998434	chr1:160998434:G:A	G	A	1.45242	0.00760149
1	161086828	chr1:161086828:G:A	G	A	-0.738187	0.0480846
1	161152693	chr1:161152693:T:C	T	C	0.928421	0.027872
1	161189357	chr1:161189357:C:T	C	T	-0.46569	0.0374266
1	161255491	chr1:161255491:G:A	G	A	-0.698416	0.00806048
1	161493252	chr1:161493252:A:G	A	G	-0.668427	0.027345
1	161509955	chr1:161509955:A:G	A	G	0.766265	0.00119878
1	161511729	chr1:161511729:T:C	T	C	0.594288	0.0247201
1	161623332	chr1:161623332:C:T	C	T	-0.945457	0.00814531
1	161637743	chr1:161637743:T:G	T	G	-1.32065	0.0260069
1	161698278	chr1:161698278:A:C	A	C	0.713437	0.00309745
1	161704797	chr1:161704797:T:C	T	C	-0.997484	0.00240009
1	161738085	chr1:161738085:G:A	G	A	1.70618	0.0397118
1	161739329	chr1:161739329:C:T	C	T	-0.747043	0.000763459
1	161978337	chr1:161978337:A:G	A	G	0.640933	0.0106136
1	162010632	chr1:162010632:C:T	C	T	0.712462	0.0466387
1	162059883	chr1:162059883:C:T	C	T	0.428846	0.0430174
1	162073011	chr1:162073011:A:C	A	C	1.34303	0.017388
1	162315514	chr1:162315514:C:T	C	T	-0.61356	0.025061
1	162341896	chr1:162341896:C:T	C	T	-1.13197	0.0288655
1	162407231	chr1:162407231:G:A	G	A	-0.568748	0.0202411
1	162465860	chr1:162465860:G:T	G	T	0.999499	0.00565767
1	162474570	chr1:162474570:G:A	G	A	0.658648	0.0225961
1	162609768	chr1:162609768:T:C	T	C	0.709836	0.027305
1	162687780	chr1:162687780:G:A	G	A	0.583333	0.0345891
1	162794959	chr1:162794959:G:T	G	T	-0.584022	0.00910958
1	162804194	chr1:162804194:T:C	T	C	1.05346	0.00540809
1	162830636	chr1:162830636:T:C	T	C	0.74853	0.0101403
1	162858008	chr1:162858008:T:C	T	C	-0.677332	0.0133611
1	162935644	chr1:162935644:T:G	T	G	0.534634	0.0158093
1	162989413	chr1:162989413:C:T	C	T	1.057	0.023414
1	163241243	chr1:163241243:G:T	G	T	-2.22756	0.0375327
1	163319781	chr1:163319781:C:T	C	T	0.475886	0.0261779
1	163442405	chr1:163442405:G:A	G	A	-1.15369	0.014611
1	163491547	chr1:163491547:T:C	T	C	0.621625	0.017351
1	163599564	chr1:163599564:T:C	T	C	1.17938	0.0481825
1	163750263	chr1:163750263:T:G	T	G	0.707753	0.0185039
1	163806911	chr1:163806911:C:T	C	T	1.41164	0.0286468
1	163979321	chr1:163979321:G:A	G	A	1.00498	0.0334032
1	163993297	chr1:163993297:T:C	T	C	0.571638	0.0279094
1	164388622	chr1:164388622:A:G	A	G	0.501452	0.0240346
1	164427999	chr1:164427999:A:G	A	G	-0.589008	0.0456554
1	164522555	chr1:164522555:T:C	T	C	0.584714	0.0455694
1	164573159	chr1:164573159:T:C	T	C	-0.874936	0.0109955
1	164589998	chr1:164589998:A:G	A	G	1.00462	0.00316965
1	164600617	chr1:164600617:G:A	G	A	0.538402	0.0111931
1	164636506	chr1:164636506:C:T	C	T	0.512543	0.0197405
1	164653123	chr1:164653123:T:G	T	G	0.567683	0.0256114
1	164686594	chr1:164686594:T:C	T	C	0.784743	0.0371268
1	164732079	chr1:164732079:C:T	C	T	0.93872	0.00913133
1	164749121	chr1:164749121:C:T	C	T	0.523613	0.0212798
1	164765220	chr1:164765220:A:G	A	G	-0.595568	0.0380687
1	164770614	chr1:164770614:T:C	T	C	0.631033	0.0450953
1	164866448	chr1:164866448:A:G	A	G	1.06386	0.00978472
1	164972403	chr1:164972403:A:G	A	G	-1.43722	0.0322545
1	165035420	chr1:165035420:C:T	C	T	1.03635	0.00840499
1	165092727	chr1:165092727:C:T	C	T	-1.0493	0.049575
1	165132120	chr1:165132120:A:G	A	G	0.739654	0.00174972
1	165165261	chr1:165165261:T:C	T	C	0.498261	0.0288924
1	165170734	chr1:165170734:C:T	C	T	-0.690427	0.0385721
1	165173352	chr1:165173352:C:A	C	A	0.803443	0.0416898
1	165223243	chr1:165223243:T:C	T	C	0.771954	0.00450141
1	165251560	chr1:165251560:T:C	T	C	-0.457744	0.0380286
1	165284259	chr1:165284259:G:A	G	A	-0.691389	0.0185216
1	165382328	chr1:165382328:G:A	G	A	0.750218	0.0395784
1	165386745	chr1:165386745:C:T	C	T	-0.670398	0.0172863
1	165395240	chr1:165395240:G:A	G	A	0.956488	0.00961092
1	165418227	chr1:165418227:G:A	G	A	0.700462	0.00165259
1	165418710	chr1:165418710:T:C	T	C	-0.929902	0.0259948
1	165492329	chr1:165492329:C:T	C	T	-0.613949	0.0112704
1	165493161	chr1:165493161:G:A	G	A	0.457661	0.0491186
1	165507734	chr1:165507734:T:C	T	C	-1.69995	0.0116049
1	165546865	chr1:165546865:C:T	C	T	0.565218	0.0123704
1	165624384	chr1:165624384:C:T	C	T	0.544189	0.0118818
1	165638794	chr1:165638794:T:C	T	C	-0.662992	0.00263699
1	165672630	chr1:165672630:T:C	T	C	-0.945156	0.044297
1	165838979	chr1:165838979:C:T	C	T	-0.468042	0.0312624
1	165856752	chr1:165856752:G:A	G	A	1.3039	0.0478702
1	165866154	chr1:165866154:A:G	A	G	-0.55795	0.00878293
1	166076010	chr1:166076010:A:G	A	G	-0.572197	0.00576464
1	166135200	chr1:166135200:C:T	C	T	-0.709912	0.0326187
1	166337938	chr1:166337938:G:T	G	T	-0.514122	0.0258611
1	166361617	chr1:166361617:G:A	G	A	-0.607133	0.0109238
1	166493542	chr1:166493542:C:T	C	T	-0.454787	0.0452212
1	166572912	chr1:166572912:C:T	C	T	2.09708	0.00981361
1	166705219	chr1:166705219:G:T	G	T	0.415004	0.0462814
1	166752048	chr1:166752048:A:C	A	C	-0.604581	0.0195931
1	167008255	chr1:167008255:G:A	G	A	0.755648	0.0102511
1	167058185	chr1:167058185:C:T	C	T	-0.59697	0.00829628
1	167071551	chr1:167071551:C:A	C	A	0.463783	0.0491142
1	167087229	chr1:167087229:A:G	A	G	0.475366	0.0237781
1	167176551	chr1:167176551:G:A	G	A	0.477869	0.0372507
1	167502618	chr1:167502618:C:T	C	T	0.462918	0.0373025
1	167546560	chr1:167546560:T:C	T	C	-0.417733	0.0479608
1	167647601	chr1:167647601:C:A	C	A	-0.768199	0.0067983
1	167800002	chr1:167800002:G:A	G	A	-0.64032	0.0312914
1	167840045	chr1:167840045:C:A	C	A	1.53138	0.0224554
1	167866973	chr1:167866973:C:A	C	A	0.560639	0.00844223
1	168059436	chr1:168059436:G:A	G	A	-2.26403	0.0466987
1	168074500	chr1:168074500:G:T	G	T	-2.17685	0.0454272
1	168102050	chr1:168102050:A:G	A	G	0.787729	0.0109333
1	168148628	chr1:168148628:A:G	A	G	0.444158	0.0434449
1	168285782	chr1:168285782:A:G	A	G	-0.479941	0.0289398
1	168286092	chr1:168286092:G:A	G	A	-0.517016	0.0394459
1	168366529	chr1:168366529:T:G	T	G	0.84907	0.0459854
1	168381049	chr1:168381049:A:G	A	G	1.60793	0.0447008
1	168396918	chr1:168396918:G:A	G	A	1.67481	0.0344206
1	168415425	chr1:168415425:A:G	A	G	-0.746333	0.00201655
1	168431263	chr1:168431263:C:T	C	T	-0.895459	0.0189912
1	168483911	chr1:168483911:T:C	T	C	-0.560995	0.0273513
1	168541917	chr1:168541917:T:C	T	C	-0.564432	0.00979131
1	168580647	chr1:168580647:T:C	T	C	-0.672945	0.0423274
1	168775115	chr1:168775115:C:T	C	T	-0.50551	0.022287
1	168821155	chr1:168821155:T:G	T	G	0.531669	0.0208106
1	168896760	chr1:168896760:T:C	T	C	0.581393	0.0170964
1	168917628	chr1:168917628:A:C	A	C	0.487916	0.030435
1	168952519	chr1:168952519:G:A	G	A	-0.592749	0.00595744
1	169109334	chr1:169109334:C:T	C	T	0.568923	0.0115275
1	169150903	chr1:169150903:C:T	C	T	-1.44185	0.0339637
1	169161049	chr1:169161049:T:C	T	C	-0.554557	0.0108634
1	169239880	chr1:169239880:A:G	A	G	-1.62872	0.0131308
1	169501496	chr1:169501496:C:T	C	T	-1.15466	0.0403931
1	169637174	chr1:169637174:C:T	C	T	-0.634487	0.0120094
1	169756344	chr1:169756344:G:T	G	T	0.581913	0.0270789
1	169825547	chr1:169825547:T:C	T	C	1.007	0.00218569
1	170198398	chr1:170198398:A:G	A	G	-0.462655	0.0440522
1	170210022	chr1:170210022:A:G	A	G	-0.51978	0.0158283
1	170230002	chr1:170230002:A:C	A	C	-0.592382	0.0465281
1	170232325	chr1:170232325:A:G	A	G	-0.581777	0.0289414
1	170550743	chr1:170550743:T:C	T	C	-0.686636	0.00392966
1	170550879	chr1:170550879:A:G	A	G	-0.914792	0.0302058
1	170674224	chr1:170674224:G:A	G	A	0.906272	0.0342376
1	170689183	chr1:170689183:G:T	G	T	-1.00635	0.0468032
1	170822574	chr1:170822574:C:A	C	A	-0.914006	0.00339382
1	170934630	chr1:170934630:C:T	C	T	-0.526488	0.0185288
1	170972275	chr1:170972275:A:C	A	C	0.526606	0.0232237
1	170981723	chr1:170981723:C:T	C	T	-0.771894	0.0191646
1	171141730	chr1:171141730:G:T	G	T	0.66651	0.0190827
1	171167936	chr1:171167936:T:G	T	G	-0.54843	0.027982
1	171428073	chr1:171428073:C:T	C	T	-0.899331	0.0178291
1	171440376	chr1:171440376:C:T	C	T	0.832124	0.0179696
1	171441908	chr1:171441908:G:A	G	A	1.63333	0.00478258
1	171589934	chr1:171589934:G:A	G	A	0.507797	0.0280066
1	171611508	chr1:171611508:A:G	A	G	-1.17874e-14	0.00410591
1	171680457	chr1:171680457:C:A	C	A	0.546354	0.0101775
1	171864951	chr1:171864951:C:T	C	T	-0.716437	0.0145461
1	171960311	chr1:171960311:A:G	A	G	-1.36307	0.0380015
1	172062311	chr1:172062311:T:C	T	C	0.567142	0.0113659
1	172120186	chr1:172120186:G:A	G	A	-1.00782	0.0433108
1	172252828	chr1:172252828:C:A	C	A	1.16309	0.022391
1	172656393	chr1:172656393:G:A	G	A	-0.504655	0.0296245
1	172771814	chr1:172771814:A:C	A	C	-0.821563	0.0143089
1	172967706	chr1:172967706:A:G	A	G	-0.573763	0.0112796
1	173348395	chr1:173348395:T:C	T	C	0.926043	0.000932757
1	173410855	chr1:173410855:A:G	A	G	1.74643	0.033839
1	173429041	chr1:173429041:A:G	A	G	0.593537	0.0185643
1	173524173	chr1:173524173:A:G	A	G	-0.573446	0.0421464
1	173882300	chr1:173882300:G:A	G	A	-0.596154	0.0279608
1	174203246	chr1:174203246:T:C	T	C	0.492314	0.0328494
1	175028192	chr1:175028192:T:C	T	C	0.534018	0.0120273
1	175158446	chr1:175158446:C:T	C	T	-0.72047	0.0301956
1	175182047	chr1:175182047:T:C	T	C	-0.900572	0.00892512
1	175293919	chr1:175293919:A:G	A	G	0.433502	0.0411691
1	175418861	chr1:175418861:C:T	C	T	-0.421749	0.0378827
1	175464624	chr1:175464624:A:C	A	C	-1.74889	0.0326406
1	175475797	chr1:175475797:G:A	G	A	-0.950659	0.00122085
1	175600337	chr1:175600337:A:G	A	G	-0.704543	0.0023353
1	175640217	chr1:175640217:T:G	T	G	-0.870427	0.000117732
1	175669200	chr1:175669200:G:A	G	A	1.02639	0.0011395
1	175689395	chr1:175689395:G:A	G	A	-0.703349	0.0096894
1	175753409	chr1:175753409:C:T	C	T	-0.608117	0.036731
1	175858386	chr1:175858386:T:G	T	G	1.1616	0.000161991
1	175861378	chr1:175861378:A:G	A	G	1.09873	0.00225166
1	175867635	chr1:175867635:A:G	A	G	0.674812	0.0118616
1	175880589	chr1:175880589:C:T	C	T	-0.665134	0.0362424
1	176055260	chr1:176055260:C:T	C	T	-0.699721	0.0195091
1	176315549	chr1:176315549:G:A	G	A	-0.708294	0.0450665
1	176579210	chr1:176579210:C:T	C	T	0.629305	0.0277358
1	176916031	chr1:176916031:G:A	G	A	0.953544	0.0227003
1	177022300	chr1:177022300:T:G	T	G	0.650002	0.0157203
1	177112540	chr1:177112540:T:C	T	C	0.682491	0.0334418
1	177166981	chr1:177166981:A:G	A	G	-0.426607	0.0417993
1	177319422	chr1:177319422:T:C	T	C	-0.502874	0.0221271
1	177679598	chr1:177679598:A:G	A	G	-0.621278	0.00468394
1	177682093	chr1:177682093:A:C	A	C	-0.588846	0.0149055
1	177683730	chr1:177683730:A:C	A	C	-0.69327	0.0245313
1	177687415	chr1:177687415:G:A	G	A	0.720824	0.00123855
1	177722267	chr1:177722267:C:T	C	T	1.23016	0.0125468
1	177795442	chr1:177795442:A:G	A	G	0.479068	0.0304773
1	177833257	chr1:177833257:G:A	G	A	0.730604	0.0177058
1	177966530	chr1:177966530:G:A	G	A	0.535416	0.0141669
1	178508297	chr1:178508297:G:A	G	A	-0.488067	0.0283575
1	178515539	chr1:178515539:A:G	A	G	-0.879957	0.00947806
1	178692206	chr1:178692206:C:T	C	T	1.75547	0.000211085
1	178975908	chr1:178975908:A:G	A	G	0.818593	0.0113406
1	179276807	chr1:179276807:A:G	A	G	0.52822	0.0408412
1	179470884	chr1:179470884:G:T	G	T	-0.551326	0.00878984
1	179558048	chr1:179558048:C:T	C	T	-0.443269	0.0356246
1	179826820	chr1:179826820:G:A	G	A	-0.644816	0.0046286
1	180131852	chr1:180131852:G:A	G	A	-0.573952	0.0279335
1	180178373	chr1:180178373:G:T	G	T	-0.633278	0.00570067
1	180265960	chr1:180265960:C:T	C	T	-1.37875	0.0409149
1	180527446	chr1:180527446:G:A	G	A	-0.523412	0.017168
1	180903880	chr1:180903880:T:C	T	C	-0.727468	0.00837373
1	180927776	chr1:180927776:G:T	G	T	1.02463	0.00532882
1	181003227	chr1:181003227:G:T	G	T	0.559063	0.0490025
1	181120465	chr1:181120465:G:T	G	T	-0.540814	0.0194113
1	181202632	chr1:181202632:G:T	G	T	-0.866698	0.0330279
1	181416933	chr1:181416933:T:C	T	C	0.516434	0.0174868
1	181418974	chr1:181418974:G:T	G	T	-0.538012	0.0466932
1	181479701	chr1:181479701:T:C	T	C	-0.476239	0.0435128
1	181513622	chr1:181513622:A:G	A	G	-1.17344	0.0146574
1	181542733	chr1:181542733:G:A	G	A	-1.29842	0.0212306
1	181904243	chr1:181904243:C:A	C	A	-1.02772	0.0117267
1	181937576	chr1:181937576:C:T	C	T	1.60869	0.0196307
1	182036813	chr1:182036813:C:T	C	T	0.477803	0.0456461
1	182079842	chr1:182079842:T:C	T	C	1.17292	0.0116698
1	182243174	chr1:182243174:T:C	T	C	-1.16083	0.00887996
1	182255655	chr1:182255655:G:A	G	A	0.988652	0.0270129
1	182333703	chr1:182333703:C:T	C	T	-1.30357	0.00641753
1	182396008	chr1:182396008:C:T	C	T	0.697039	0.00911956
1	182435549	chr1:182435549:A:G	A	G	-0.464578	0.0369879
1	182659582	chr1:182659582:C:T	C	T	0.464554	0.0262885
1	182729296	chr1:182729296:T:C	T	C	1.00663	0.0238118
1	183154963	chr1:183154963:A:G	A	G	0.570238	0.0342654
1	183208083	chr1:183208083:A:G	A	G	-0.496722	0.0177423
1	183259851	chr1:183259851:G:A	G	A	0.508546	0.0207905
1	183415661	chr1:183415661:G:A	G	A	0.70847	0.00120113
1	183425343	chr1:183425343:G:T	G	T	1.32887	0.00161957
1	183548398	chr1:183548398:C:T	C	T	-0.960768	0.0005995
1	183615219	chr1:183615219:C:T	C	T	-0.714266	0.00140513
1	183712856	chr1:183712856:C:T	C	T	-1.3346	0.0248281
1	183829667	chr1:183829667:G:A	G	A	0.428181	0.0450754
1	183996603	chr1:183996603:G:A	G	A	-0.847505	0.0262492
1	184000377	chr1:184000377:C:T	C	T	-0.711256	0.0432708
1	184036411	chr1:184036411:G:A	G	A	0.669655	0.012894
1	184172142	chr1:184172142:T:C	T	C	0.525465	0.028892
1	184249346	chr1:184249346:C:T	C	T	0.443838	0.0377987
1	184352651	chr1:184352651:C:T	C	T	0.848992	0.0444947
1	184694764	chr1:184694764:C:T	C	T	-0.534808	0.0256792
1	184786047	chr1:184786047:G:T	G	T	1.10879	0.0194319
1	184807059	chr1:184807059:T:C	T	C	-0.494674	0.0291752
1	184947550	chr1:184947550:T:G	T	G	-0.477298	0.0272141
1	184984701	chr1:184984701:C:T	C	T	0.95214	0.0468734
1	185464285	chr1:185464285:G:A	G	A	1.17789	0.0118705
1	185506494	chr1:185506494:T:C	T	C	1.94653	0.0196318
1	185527366	chr1:185527366:C:T	C	T	0.483613	0.0275194
1	185566077	chr1:185566077:C:T	C	T	0.631483	0.0107624
1	185569788	chr1:185569788:T:C	T	C	-1.2237	0.00705573
1	185629053	chr1:185629053:A:G	A	G	-0.494128	0.0273103
1	185896419	chr1:185896419:G:A	G	A	0.843208	0.0167999
1	186113500	chr1:186113500:G:A	G	A	0.977843	0.0252276
1	186186920	chr1:186186920:A:G	A	G	-0.81907	0.019816
1	186206168	chr1:186206168:G:T	G	T	-0.621786	0.0129227
1	186219319	chr1:186219319:T:C	T	C	0.793432	0.0381984
1	186288224	chr1:186288224:G:A	G	A	1.15053	0.0200586
1	186816900	chr1:186816900:G:A	G	A	0.762865	0.0304429
1	186830478	chr1:186830478:G:A	G	A	-0.641758	0.00532393
1	186868059	chr1:186868059:C:T	C	T	1.0842	0.0116501
1	186957017	chr1:186957017:C:T	C	T	-0.459824	0.0353143
1	187007954	chr1:187007954:C:T	C	T	-0.608871	0.00517199
1	187076021	chr1:187076021:T:C	T	C	-0.712547	0.00221021
1	187093160	chr1:187093160:A:G	A	G	-0.599364	0.0382281
1	187114322	chr1:187114322:C:A	C	A	-0.489773	0.0248365
1	187274520	chr1:187274520:T:C	T	C	0.59301	0.0112177
1	187415559	chr1:187415559:A:G	A	G	0.654581	0.0181023
1	187589646	chr1:187589646:C:T	C	T	0.869124	0.0147517
1	187629769	chr1:187629769:A:G	A	G	-0.488873	0.0296852
1	188072476	chr1:188072476:A:C	A	C	-0.733852	0.00166989
1	188144454	chr1:188144454:G:T	G	T	-0.744952	0.0198768
1	188199975	chr1:188199975:A:G	A	G	0.584038	0.0307349
1	188597043	chr1:188597043:T:C	T	C	-0.761832	0.00464845
1	188646098	chr1:188646098:A:G	A	G	0.444974	0.0451983
1	188773273	chr1:188773273:T:C	T	C	0.533338	0.0242366
1	188870883	chr1:188870883:A:G	A	G	-0.538557	0.0174803
1	189018697	chr1:189018697:T:C	T	C	1.0023	0.00153456
1	189349016	chr1:189349016:C:T	C	T	0.720866	0.0223738
1	189778537	chr1:189778537:C:T	C	T	1.29978	0.0350041
1	189840481	chr1:189840481:C:T	C	T	-0.517672	0.0232813
1	189867796	chr1:189867796:A:G	A	G	0.881148	0.00723574
1	189936045	chr1:189936045:T:C	T	C	0.602547	0.00677857
1	190003458	chr1:190003458:T:G	T	G	-0.424775	0.0427112
1	190025816	chr1:190025816:A:C	A	C	0.771542	0.013867
1	190275962	chr1:190275962:T:G	T	G	-0.804358	0.000410244
1	190720011	chr1:190720011:T:C	T	C	0.596809	0.0474191
1	190795067	chr1:190795067:C:T	C	T	0.48376	0.0313924
1	191275728	chr1:191275728:G:A	G	A	0.524607	0.0257177
1	191366220	chr1:191366220:T:C	T	C	-0.689356	0.00301811
1	191392920	chr1:191392920:T:C	T	C	-0.708666	0.00539762
1	191464333	chr1:191464333:A:C	A	C	0.441212	0.042064
1	191475489	chr1:191475489:T:C	T	C	0.706271	0.0498482
1	191657874	chr1:191657874:C:T	C	T	-0.712431	0.0025987
1	191672954	chr1:191672954:G:A	G	A	0.544161	0.0306382
1	192043252	chr1:192043252:T:C	T	C	0.561277	0.036035
1	192201285	chr1:192201285:C:T	C	T	0.789869	0.00440695
1	192382136	chr1:192382136:A:G	A	G	0.532434	0.0247168
1	192429353	chr1:192429353:A:G	A	G	-0.81688	0.000600794
1	192515039	chr1:192515039:C:T	C	T	0.519058	0.0232279
1	192942842	chr1:192942842:G:T	G	T	1.38758	0.0441242
1	193085355	chr1:193085355:T:C	T	C	-0.464956	0.0370789
1	193380928	chr1:193380928:G:A	G	A	0.615101	0.018857
1	193469314	chr1:193469314:A:G	A	G	-1.27142	0.0230727
1	193533479	chr1:193533479:A:G	A	G	0.483985	0.0485953
1	193643062	chr1:193643062:T:G	T	G	-0.858609	0.00791296
1	193661477	chr1:193661477:T:C	T	C	-0.58322	0.0406254
1	193809012	chr1:193809012:C:T	C	T	0.741045	0.0174884
1	194584180	chr1:194584180:C:T	C	T	-0.585427	0.0281534
1	194764230	chr1:194764230:A:G	A	G	1.08888	0.000512871
1	194767459	chr1:194767459:T:G	T	G	-0.461076	0.0472193
1	195145234	chr1:195145234:C:A	C	A	0.996497	0.021919
1	195175149	chr1:195175149:G:A	G	A	-0.830892	0.0325936
1	195227359	chr1:195227359:C:T	C	T	1.72197	0.0362892
1	195290378	chr1:195290378:C:T	C	T	-0.903189	0.0316118
1	195302993	chr1:195302993:C:T	C	T	-1.46956	0.0326199
1	195518666	chr1:195518666:C:A	C	A	0.935048	0.00995383
1	195773781	chr1:195773781:G:A	G	A	1.02404	0.0216247
1	195823576	chr1:195823576:C:T	C	T	2.08182	0.00962503
1	195867406	chr1:195867406:G:A	G	A	0.485765	0.0306914
1	195890547	chr1:195890547:C:T	C	T	-0.51182	0.0198132
1	195957643	chr1:195957643:G:T	G	T	0.60384	0.024815
1	195999245	chr1:195999245:C:T	C	T	-0.946159	0.0471206
1	196030674	chr1:196030674:A:G	A	G	0.520904	0.0240934
1	196094734	chr1:196094734:T:G	T	G	-1.05616	0.0263402
1	196164458	chr1:196164458:A:G	A	G	-0.784271	0.00959703
1	196429489	chr1:196429489:T:C	T	C	0.780783	0.0187987
1	196765825	chr1:196765825:T:C	T	C	0.977438	0.0122813
1	196951048	chr1:196951048:C:T	C	T	0.51342	0.020816
1	197383839	chr1:197383839:A:G	A	G	0.615368	0.0252165
1	197789439	chr1:197789439:A:G	A	G	-0.642146	0.0300526
1	197845477	chr1:197845477:T:C	T	C	-0.783686	0.00858384
1	197960367	chr1:197960367:A:G	A	G	-0.570896	0.0264918
1	197971083	chr1:197971083:T:C	T	C	-1.15725	0.00135697
1	198014290	chr1:198014290:G:A	G	A	0.469372	0.0283428
1	198017654	chr1:198017654:C:T	C	T	-0.506445	0.0306257
1	198051467	chr1:198051467:A:G	A	G	-0.44708	0.042244
1	198216506	chr1:198216506:A:G	A	G	2.17624	0.0472353
1	198477068	chr1:198477068:C:A	C	A	1.18643	0.00124447
1	198602600	chr1:198602600:G:A	G	A	0.795321	0.0497013
1	198806192	chr1:198806192:T:C	T	C	0.726751	0.00314736
1	198843596	chr1:198843596:T:G	T	G	0.45568	0.0414006
1	198945928	chr1:198945928:T:C	T	C	0.840632	0.00332098
1	199007363	chr1:199007363:C:T	C	T	0.599019	0.0075539
1	199159335	chr1:199159335:A:G	A	G	0.567342	0.0189084
1	199181325	chr1:199181325:C:T	C	T	-0.880588	0.000968086
1	199198856	chr1:199198856:G:A	G	A	1.35212	0.0472401
1	199284190	chr1:199284190:T:G	T	G	-0.581717	0.00936267
1	199286109	chr1:199286109:G:A	G	A	1.38025	0.0476568
1	199482539	chr1:199482539:T:C	T	C	0.484028	0.0465316
1	199991353	chr1:199991353:G:T	G	T	-0.668757	0.016704
1	200099530	chr1:200099530:C:T	C	T	-0.834171	0.00277351
1	200108907	chr1:200108907:G:T	G	T	-1.83815	0.00824992
1	200214911	chr1:200214911:C:T	C	T	0.59024	0.02525
1	200220396	chr1:200220396:A:C	A	C	0.6378	0.00812038
1	200258472	chr1:200258472:A:G	A	G	-1.296	0.0192725
1	200727731	chr1:200727731:T:C	T	C	0.491527	0.0250244
1	200912804	chr1:200912804:G:A	G	A	0.777379	0.0201245
1	200997482	chr1:200997482:T:C	T	C	0.578394	0.0409509
1	201042885	chr1:201042885:C:T	C	T	0.643778	0.0136623
1	201099170	chr1:201099170:T:C	T	C	0.627878	0.00565084
1	201116292	chr1:201116292:G:A	G	A	-0.473442	0.0422211
1	201153688	chr1:201153688:T:C	T	C	1.52377	0.0023421
1	201179905	chr1:201179905:C:T	C	T	0.911252	0.00682117
1	201253729	chr1:201253729:G:A	G	A	0.507001	0.0406121
1	201291514	chr1:201291514:A:C	A	C	0.520603	0.0253501
1	201338947	chr1:201338947:C:T	C	T	-1.57617	0.00971747
1	201353133	chr1:201353133:G:A	G	A	-0.753226	0.0183054
1	201357072	chr1:201357072:C:T	C	T	1.12107	0.0443953
1	201396998	chr1:201396998:G:A	G	A	-0.597938	0.0357092
1	201461146	chr1:201461146:G:A	G	A	-0.690454	0.00933539
1	201468871	chr1:201468871:C:T	C	T	-0.587751	0.0446056
1	201552544	chr1:201552544:T:G	T	G	1.58017	0.0141844
1	201637150	chr1:201637150:A:G	A	G	-0.500129	0.0177712
1	201655197	chr1:201655197:A:G	A	G	0.575741	0.029566
1	201676532	chr1:201676532:G:T	G	T	-0.574027	0.0270658
1	201769225	chr1:201769225:T:C	T	C	-1.83269	0.00541248
1	201930625	chr1:201930625:A:G	A	G	0.746524	0.00723931
1	201941481	chr1:201941481:C:T	C	T	-0.505204	0.0190182
1	201959271	chr1:201959271:G:A	G	A	0.478773	0.0495212
1	202086810	chr1:202086810:A:G	A	G	0.848067	0.0397751
1	202098754	chr1:202098754:C:T	C	T	-0.721143	0.0176356
1	202189542	chr1:202189542:G:T	G	T	-0.609084	0.0182828
1	202243119	chr1:202243119:C:A	C	A	-1.09563	0.0269682
1	202419516	chr1:202419516:T:C	T	C	-0.878665	0.0188832
1	202636923	chr1:202636923:T:C	T	C	0.643148	0.00628588
1	202653174	chr1:202653174:C:T	C	T	-2.30408	0.0413983
1	202858063	chr1:202858063:G:A	G	A	0.501213	0.0320461
1	203052895	chr1:203052895:T:G	T	G	0.396276	0.0484698
1	203139380	chr1:203139380:T:C	T	C	-0.511442	0.0199807
1	203175705	chr1:203175705:G:A	G	A	-0.948227	0.00579785
1	203205793	chr1:203205793:A:G	A	G	-1.21865	0.0215488
1	203234573	chr1:203234573:C:T	C	T	-0.605692	0.0445698
1	203398265	chr1:203398265:C:T	C	T	-0.563244	0.0117213
1	203411637	chr1:203411637:G:A	G	A	-0.454788	0.0394135
1	203453994	chr1:203453994:G:A	G	A	1.77661	0.0332339
1	203482089	chr1:203482089:G:A	G	A	1.14034	0.0217761
1	203516116	chr1:203516116:C:A	C	A	-0.552687	0.00925598
1	203523772	chr1:203523772:C:A	C	A	0.614757	0.0050433
1	203550066	chr1:203550066:T:C	T	C	0.856042	0.0163923
1	203551293	chr1:203551293:G:T	G	T	2.18117	0.0442894
1	203605932	chr1:203605932:T:G	T	G	-0.556054	0.0259148
1	203644003	chr1:203644003:A:G	A	G	-0.962847	0.04168
1	203677062	chr1:203677062:T:G	T	G	-0.565185	0.00791519
1	203690648	chr1:203690648:G:A	G	A	-1.11225	0.00759925
1	203771982	chr1:203771982:C:T	C	T	-0.592715	0.0330013
1	203809932	chr1:203809932:G:A	G	A	0.923096	0.00214978
1	203873164	chr1:203873164:C:T	C	T	-0.649345	0.016535
1	203896680	chr1:203896680:A:G	A	G	1.01967	0.00234029
1	203995267	chr1:203995267:G:A	G	A	0.720832	0.0256243
1	204080072	chr1:204080072:G:A	G	A	1.50924	0.0232343
1	204112874	chr1:204112874:C:T	C	T	-1.11036	0.0158548
1	204277152	chr1:204277152:T:C	T	C	0.495857	0.0348447
1	204291682	chr1:204291682:A:C	A	C	-0.607993	0.0116295
1	204293132	chr1:204293132:T:C	T	C	1.16253	0.0315226
1	204300031	chr1:204300031:C:T	C	T	-1.38791	0.0126371
1	204374591	chr1:204374591:T:C	T	C	-0.491606	0.0379269
1	204390469	chr1:204390469:T:C	T	C	-0.454039	0.0362961
1	204426351	chr1:204426351:C:T	C	T	0.934645	0.000199062
1	204445642	chr1:204445642:GGATGGATACAGT:G	GGATGGATACAGT	G	1.72327	0.0253003
1	204664000	chr1:204664000:G:A	G	A	-1.09063	0.00184772
1	204809617	chr1:204809617:T:C	T	C	0.893984	0.000536615
1	204912884	chr1:204912884:T:C	T	C	-0.664437	0.0206727
1	204937071	chr1:204937071:G:T	G	T	0.500313	0.0227328
1	204963483	chr1:204963483:A:G	A	G	-0.640957	0.0128623
1	204999938	chr1:204999938:A:G	A	G	-0.871918	0.00421409
1	205027968	chr1:205027968:C:T	C	T	0.54148	0.0486063
1	205064155	chr1:205064155:G:A	G	A	-0.466436	0.0286744
1	205184184	chr1:205184184:G:A	G	A	-1.21184	0.00644973
1	205305933	chr1:205305933:C:T	C	T	0.494561	0.0302569
1	205327427	chr1:205327427:C:T	C	T	0.451923	0.0308817
1	205332703	chr1:205332703:C:T	C	T	1.53733	0.023014
1	205369991	chr1:205369991:G:A	G	A	-0.917292	0.00100699
1	205388440	chr1:205388440:C:T	C	T	-0.444537	0.0404935
1	205412000	chr1:205412000:C:A	C	A	-1.10261	0.0129513
1	205477942	chr1:205477942:T:C	T	C	-0.420289	0.0461604
1	205507495	chr1:205507495:T:C	T	C	0.49388	0.0406474
1	205615259	chr1:205615259:C:A	C	A	-1.1338	0.0278974
1	205645027	chr1:205645027:C:A	C	A	-0.636678	0.013319
1	205673662	chr1:205673662:T:G	T	G	0.613774	0.00523059
1	205795512	chr1:205795512:G:A	G	A	-0.535318	0.0113218
1	205843784	chr1:205843784:A:G	A	G	-0.620884	0.00461279
1	205923962	chr1:205923962:G:T	G	T	-0.745679	0.0331994
1	205939058	chr1:205939058:A:C	A	C	-0.53964	0.00663517
1	205955081	chr1:205955081:G:A	G	A	-0.492819	0.0309188
1	206314064	chr1:206314064:T:C	T	C	0.501285	0.0458987
1	206457375	chr1:206457375:G:A	G	A	-0.575073	0.0299132
1	206474044	chr1:206474044:T:G	T	G	0.588972	0.019813
1	206518744	chr1:206518744:G:T	G	T	-0.620772	0.0173896
1	206582535	chr1:206582535:G:A	G	A	-0.815557	0.00160313
1	206610602	chr1:206610602:T:C	T	C	-0.763903	0.0110182
1	206626737	chr1:206626737:T:C	T	C	-0.514507	0.0327027
1	206722016	chr1:206722016:G:T	G	T	0.811619	0.0160925
1	206731119	chr1:206731119:C:T	C	T	-0.696984	0.0120004
1	206738174	chr1:206738174:A:G	A	G	-0.796558	0.00303209
1	206998258	chr1:206998258:G:A	G	A	0.641044	0.00772538
1	207095434	chr1:207095434:A:G	A	G	0.461949	0.0424816
1	207116091	chr1:207116091:G:A	G	A	0.519159	0.0301498
1	207210723	chr1:207210723:T:C	T	C	0.497691	0.0271355
1	207464014	chr1:207464014:T:C	T	C	0.682116	0.010111
1	207512441	chr1:207512441:T:C	T	C	1.61507	0.0198492
1	207651093	chr1:207651093:A:C	A	C	-0.535457	0.0484726
1	207848946	chr1:207848946:T:C	T	C	0.518749	0.0494427
1	207866357	chr1:207866357:G:A	G	A	-0.972673	0.00852147
1	207914555	chr1:207914555:T:G	T	G	1.53131	0.0293085
1	207990004	chr1:207990004:T:C	T	C	0.6653	0.00317014
1	208018765	chr1:208018765:T:C	T	C	-0.470066	0.0455734
1	208168155	chr1:208168155:C:A	C	A	0.639051	0.00340186
1	208192956	chr1:208192956:C:A	C	A	-1.9246	0.0179735
1	208233920	chr1:208233920:C:A	C	A	-2.32949	0.0352045
1	208416560	chr1:208416560:C:T	C	T	-0.589972	0.0302479
1	208438319	chr1:208438319:G:A	G	A	-1.27242	0.0320659
1	208539820	chr1:208539820:T:C	T	C	-1.37368	0.0461906
1	208659638	chr1:208659638:A:G	A	G	0.444006	0.0362162
1	208802993	chr1:208802993:C:A	C	A	0.477098	0.0280547
1	208922607	chr1:208922607:A:G	A	G	0.539747	0.026024
1	208948332	chr1:208948332:C:T	C	T	0.601215	0.0290412
1	209003376	chr1:209003376:G:A	G	A	0.770866	0.0236518
1	209048841	chr1:209048841:C:T	C	T	-0.584944	0.00686464
1	209156649	chr1:209156649:G:A	G	A	-0.549137	0.0381501
1	209242399	chr1:209242399:G:T	G	T	1.05245	0.0263291
1	209347579	chr1:209347579:G:A	G	A	0.75949	0.0413972
1	209424494	chr1:209424494:C:T	C	T	-1.67809	0.0414328
1	209483966	chr1:209483966:G:A	G	A	0.672694	0.0466376
1	209526628	chr1:209526628:T:C	T	C	0.630437	0.0355097
1	209575814	chr1:209575814:G:A	G	A	-0.59702	0.0286532
1	209596034	chr1:209596034:G:A	G	A	0.949949	0.0463407
1	209611582	chr1:209611582:G:T	G	T	0.459812	0.0289182
1	209774179	chr1:209774179:C:T	C	T	-0.545502	0.0450587
[truncated: 32,343 more rows]

## Sheet: S4
CHR	POS	SNP	REF	ALT	BETA	P
1	874496	chr1:874496:A:G	A	G	0.624901	0.0160456
1	928210	chr1:928210:G:A	G	A	-0.665147	0.0346401
1	1193652	chr1:1193652:A:G	A	G	1.39456	0.00389833
1	1624591	chr1:1624591:C:T	C	T	0.980698	0.0475697
1	1650744	chr1:1650744:T:C	T	C	0.648537	0.0312246
1	1764895	chr1:1764895:A:C	A	C	0.717326	0.0382052
1	1920497	chr1:1920497:C:A	C	A	0.687887	0.000595721
1	2002428	chr1:2002428:T:C	T	C	-0.519572	0.0401435
1	2021579	chr1:2021579:G:A	G	A	-0.712999	0.0409931
1	2125296	chr1:2125296:T:C	T	C	-2.35935	0.0453302
1	2282992	chr1:2282992:C:T	C	T	0.358378	0.0348872
1	2288000	chr1:2288000:T:G	T	G	0.508868	0.00810188
1	2288986	chr1:2288986:T:C	T	C	-0.435984	0.0137136
1	2290738	chr1:2290738:G:A	G	A	-0.439873	0.0315839
1	2300128	chr1:2300128:G:T	G	T	0.427942	0.00912436
1	2308944	chr1:2308944:C:T	C	T	-0.514685	0.0486106
1	2454986	chr1:2454986:G:A	G	A	0.764754	0.0269128
1	3140997	chr1:3140997:T:G	T	G	-0.850785	0.0145533
1	3146223	chr1:3146223:G:A	G	A	-0.684188	0.0311722
1	3178108	chr1:3178108:A:G	A	G	0.353802	0.0458451
1	3220788	chr1:3220788:C:T	C	T	-0.739957	0.00362053
1	3223352	chr1:3223352:G:A	G	A	1.49839	0.0123376
1	3232133	chr1:3232133:T:C	T	C	1.61751	0.0413939
1	3294681	chr1:3294681:C:T	C	T	-0.872396	0.031547
1	3368586	chr1:3368586:C:T	C	T	0.343853	0.0394192
1	3404235	chr1:3404235:C:T	C	T	0.427818	0.017805
1	3432949	chr1:3432949:T:C	T	C	-0.388486	0.033726
1	3475762	chr1:3475762:A:G	A	G	0.597523	0.0373382
1	3501827	chr1:3501827:C:T	C	T	-0.409247	0.0180229
1	3522626	chr1:3522626:G:A	G	A	0.365275	0.0293659
1	3545767	chr1:3545767:C:T	C	T	-2.23845	0.0333878
1	3578131	chr1:3578131:C:T	C	T	0.591316	0.0452598
1	3677541	chr1:3677541:A:G	A	G	-0.369895	0.0183785
1	3691663	chr1:3691663:A:G	A	G	0.439625	0.0112047
1	3706318	chr1:3706318:A:G	A	G	-0.500163	0.0062888
1	3765267	chr1:3765267:T:C	T	C	0.668085	0.0135356
1	3792923	chr1:3792923:A:G	A	G	-0.3865	0.0373258
1	3866044	chr1:3866044:C:T	C	T	-0.558295	0.00124254
1	3880655	chr1:3880655:T:C	T	C	0.375125	0.0250889
1	3900688	chr1:3900688:T:C	T	C	1.01605	0.00599341
1	3944368	chr1:3944368:G:A	G	A	-0.499612	0.014547
1	3992896	chr1:3992896:A:G	A	G	0.601015	0.0437344
1	4025038	chr1:4025038:A:G	A	G	0.520278	0.00255283
1	4150342	chr1:4150342:G:A	G	A	0.362281	0.0297478
1	4170644	chr1:4170644:G:A	G	A	0.677759	0.0293572
1	4286585	chr1:4286585:T:C	T	C	0.429729	0.0314145
1	4358104	chr1:4358104:G:A	G	A	-0.609848	0.02749
1	4435618	chr1:4435618:T:C	T	C	-0.342968	0.0369315
1	4446584	chr1:4446584:T:C	T	C	0.602017	0.0446145
1	4461676	chr1:4461676:T:C	T	C	-0.481271	0.0056826
1	4492422	chr1:4492422:C:A	C	A	1.00843	0.020074
1	4510326	chr1:4510326:A:G	A	G	-0.538306	0.0173695
1	4528066	chr1:4528066:G:A	G	A	-0.729799	0.0287086
1	4560863	chr1:4560863:T:C	T	C	-0.464285	0.0121177
1	4581682	chr1:4581682:G:A	G	A	-0.720961	0.0385753
1	4586512	chr1:4586512:C:T	C	T	-0.417726	0.00749645
1	4623650	chr1:4623650:A:G	A	G	-0.342127	0.0384303
1	4639186	chr1:4639186:T:G	T	G	-0.61812	0.0261866
1	4653161	chr1:4653161:C:A	C	A	0.648663	0.0441656
1	4664074	chr1:4664074:A:G	A	G	-0.61229	0.0370662
1	4670392	chr1:4670392:T:C	T	C	-0.531974	0.00117818
1	4676396	chr1:4676396:G:T	G	T	-0.400404	0.0157571
1	4725389	chr1:4725389:C:T	C	T	1.37308	0.020003
1	4729914	chr1:4729914:C:T	C	T	-0.602367	0.0362216
1	4744826	chr1:4744826:A:G	A	G	0.749388	0.00649333
1	4789049	chr1:4789049:A:G	A	G	0.425548	0.0119134
1	4915357	chr1:4915357:G:A	G	A	0.882246	0.00442969
1	4921547	chr1:4921547:C:T	C	T	0.482142	0.0234383
1	4937303	chr1:4937303:A:G	A	G	-0.430822	0.0344616
1	4941993	chr1:4941993:T:G	T	G	0.543491	0.0296747
1	4961052	chr1:4961052:C:T	C	T	0.362189	0.0260311
1	5018070	chr1:5018070:C:T	C	T	0.790171	0.0275419
1	5031767	chr1:5031767:A:G	A	G	0.471019	0.0147842
1	5155225	chr1:5155225:A:G	A	G	-0.997727	0.00764454
1	5240100	chr1:5240100:T:C	T	C	-0.521204	0.0091063
1	5251978	chr1:5251978:C:A	C	A	0.524086	0.00484275
1	5298324	chr1:5298324:A:G	A	G	-0.407565	0.0133026
1	5619162	chr1:5619162:G:A	G	A	0.457347	0.0472696
1	5685279	chr1:5685279:A:G	A	G	-0.583248	0.0438675
1	5697748	chr1:5697748:C:T	C	T	-0.355139	0.0369227
1	5735534	chr1:5735534:G:A	G	A	2.21153	0.038048
1	5835134	chr1:5835134:G:A	G	A	-0.359115	0.0398733
1	5851606	chr1:5851606:T:C	T	C	1.07398	0.00604849
1	5868073	chr1:5868073:C:T	C	T	-1.52365	0.00298299
1	6023503	chr1:6023503:G:A	G	A	0.399926	0.0140969
1	6136334	chr1:6136334:G:A	G	A	-0.78966	0.0451289
1	6143229	chr1:6143229:G:A	G	A	-0.449531	0.014041
1	6236149	chr1:6236149:A:C	A	C	0.602781	0.0283802
1	6508921	chr1:6508921:G:A	G	A	-2.52191	0.020471
1	6512801	chr1:6512801:A:C	A	C	0.383347	0.0181436
1	6916308	chr1:6916308:G:A	G	A	0.755928	0.0134616
1	6916945	chr1:6916945:C:T	C	T	-0.317005	0.0446878
1	7069445	chr1:7069445:G:A	G	A	-0.435473	0.0085006
1	7107613	chr1:7107613:C:T	C	T	-0.791829	0.0191816
1	7138454	chr1:7138454:T:C	T	C	-1.07281	0.0132097
1	7161398	chr1:7161398:T:C	T	C	0.720443	0.00223412
1	7188495	chr1:7188495:A:G	A	G	0.433147	0.00850166
1	7254171	chr1:7254171:T:C	T	C	-1.45696	0.0286009
1	7259332	chr1:7259332:A:G	A	G	0.580517	0.00325659
1	7370205	chr1:7370205:C:T	C	T	-0.645661	0.0131341
1	7468515	chr1:7468515:C:T	C	T	1.03889	0.0332505
1	7492563	chr1:7492563:G:A	G	A	0.63023	0.0447999
1	7502376	chr1:7502376:G:T	G	T	-0.570751	0.0308225
1	7513813	chr1:7513813:C:T	C	T	0.402308	0.0349822
1	7526711	chr1:7526711:C:A	C	A	-0.606999	0.00118853
1	7660906	chr1:7660906:G:A	G	A	0.622736	0.0454654
1	7741312	chr1:7741312:C:T	C	T	-0.341193	0.0329457
1	7857301	chr1:7857301:C:T	C	T	0.661519	0.0357059
1	7857765	chr1:7857765:G:A	G	A	-0.369756	0.0269836
1	8129184	chr1:8129184:A:G	A	G	-0.347179	0.0340955
1	8358584	chr1:8358584:C:A	C	A	-0.402722	0.0349356
1	8412104	chr1:8412104:C:T	C	T	0.451137	0.0264762
1	8649948	chr1:8649948:T:G	T	G	0.960751	0.00908606
1	8661343	chr1:8661343:G:A	G	A	0.37923	0.0330984
1	8811426	chr1:8811426:A:G	A	G	0.521815	0.0166109
1	8947986	chr1:8947986:C:T	C	T	0.35731	0.0373307
1	9010119	chr1:9010119:A:G	A	G	-1.01859	0.0107736
1	9038171	chr1:9038171:C:T	C	T	0.446261	0.0370742
1	9100306	chr1:9100306:A:G	A	G	-1.56342	0.0171643
1	9200269	chr1:9200269:C:T	C	T	0.328199	0.0427323
1	9222647	chr1:9222647:C:T	C	T	-0.558218	0.0207648
1	9347797	chr1:9347797:C:T	C	T	0.635922	0.00272841
1	9416756	chr1:9416756:A:C	A	C	0.342924	0.0337979
1	9463424	chr1:9463424:C:T	C	T	0.542216	0.00744084
1	9502012	chr1:9502012:C:T	C	T	1.45558	0.00310749
1	9516156	chr1:9516156:A:G	A	G	-0.610677	0.00380468
1	9838375	chr1:9838375:G:A	G	A	0.529703	0.0167657
1	9864462	chr1:9864462:A:G	A	G	-0.392979	0.0492704
1	10081288	chr1:10081288:G:A	G	A	-1.58999	0.0465753
1	10175508	chr1:10175508:A:G	A	G	0.362569	0.0329089
1	10702147	chr1:10702147:T:C	T	C	-0.394993	0.0172859
1	10815013	chr1:10815013:C:T	C	T	-0.588121	0.0298104
1	10855370	chr1:10855370:T:C	T	C	1.20128	0.0281448
1	10917470	chr1:10917470:T:C	T	C	0.333615	0.0399794
1	11265810	chr1:11265810:T:G	T	G	0.99128	0.0304317
1	11595012	chr1:11595012:A:G	A	G	0.575366	0.00341179
1	11737177	chr1:11737177:T:C	T	C	0.457467	0.0431189
1	11797979	chr1:11797979:A:G	A	G	0.552671	0.0132929
1	11878153	chr1:11878153:G:A	G	A	-0.334252	0.0371735
1	11937036	chr1:11937036:C:T	C	T	-0.725066	0.0367204
1	12128370	chr1:12128370:T:C	T	C	-0.751004	0.0143132
1	12160703	chr1:12160703:C:T	C	T	0.365035	0.0298743
1	12181934	chr1:12181934:G:A	G	A	0.485259	0.0165882
1	12226881	chr1:12226881:C:T	C	T	-0.714609	0.0464206
1	12566579	chr1:12566579:A:G	A	G	0.794097	0.00189718
1	12603324	chr1:12603324:G:A	G	A	0.490064	0.0127269
1	12807929	chr1:12807929:T:C	T	C	-0.480151	0.00469766
1	12851393	chr1:12851393:T:C	T	C	-0.932651	0.000483872
1	13472636	chr1:13472636:A:G	A	G	-0.434344	0.0129534
1	13482327	chr1:13482327:A:G	A	G	-0.556465	0.0426673
1	13497666	chr1:13497666:G:A	G	A	-0.391553	0.0131757
1	13497987	chr1:13497987:C:T	C	T	-0.941545	0.00495413
1	13592842	chr1:13592842:G:A	G	A	-1.14691	0.0253281
1	13621730	chr1:13621730:C:A	C	A	-0.38471	0.0309238
1	13746542	chr1:13746542:T:C	T	C	1.13989	0.0421229
1	13796526	chr1:13796526:C:T	C	T	0.513879	0.0306422
1	13875845	chr1:13875845:G:A	G	A	0.485941	0.0142697
1	13895033	chr1:13895033:G:A	G	A	0.41294	0.0112916
1	13900861	chr1:13900861:C:T	C	T	-0.430973	0.0372608
1	13905497	chr1:13905497:G:A	G	A	-0.43008	0.0148008
1	14138656	chr1:14138656:G:A	G	A	0.392663	0.0356041
1	14181308	chr1:14181308:G:T	G	T	0.344597	0.035885
1	14199333	chr1:14199333:C:T	C	T	-1.16065	0.0164046
1	14389011	chr1:14389011:A:G	A	G	0.405689	0.0397163
1	14425235	chr1:14425235:T:C	T	C	0.475187	0.0048763
1	14563415	chr1:14563415:C:T	C	T	-0.423882	0.0450642
1	14703653	chr1:14703653:A:G	A	G	-0.354371	0.021431
1	14819573	chr1:14819573:T:C	T	C	0.91108	0.00298948
1	14842839	chr1:14842839:C:T	C	T	-0.557968	0.000533662
1	14852621	chr1:14852621:T:C	T	C	0.923354	0.00916641
1	14925656	chr1:14925656:A:G	A	G	0.361361	0.0425451
1	15001218	chr1:15001218:T:C	T	C	0.590526	0.0410537
1	15044836	chr1:15044836:T:C	T	C	0.974893	0.00255856
1	15064832	chr1:15064832:G:A	G	A	0.634824	0.0046255
1	15290558	chr1:15290558:C:T	C	T	-0.625945	0.0199472
1	15476843	chr1:15476843:A:G	A	G	-0.320388	0.0317819
1	15724854	chr1:15724854:C:A	C	A	0.500491	0.0208438
1	15805667	chr1:15805667:G:A	G	A	0.703014	0.0496807
1	16000294	chr1:16000294:G:A	G	A	-0.688747	0.0343277
1	16129681	chr1:16129681:G:A	G	A	-1.10371	0.00485658
1	16200670	chr1:16200670:G:A	G	A	0.313126	0.043698
1	17314236	chr1:17314236:C:T	C	T	1.36464	0.0429284
1	17340013	chr1:17340013:C:T	C	T	-0.325109	0.0424504
1	17460790	chr1:17460790:C:T	C	T	-0.70136	0.00245985
1	17473923	chr1:17473923:A:G	A	G	-0.934742	0.0449084
1	17485207	chr1:17485207:C:T	C	T	0.302676	0.0454886
1	17574479	chr1:17574479:A:G	A	G	-0.685302	0.00265461
1	17646549	chr1:17646549:C:T	C	T	0.869604	0.00416925
1	17712065	chr1:17712065:T:C	T	C	-0.467144	0.0108544
1	17724816	chr1:17724816:G:A	G	A	1.55193	0.0333312
1	17795514	chr1:17795514:T:C	T	C	0.4828	0.00544782
1	17835101	chr1:17835101:T:C	T	C	-0.348926	0.0249264
1	17852060	chr1:17852060:A:C	A	C	-1.50729	0.0204886
1	17870178	chr1:17870178:T:C	T	C	0.304954	0.0449963
1	17950977	chr1:17950977:C:T	C	T	-0.875199	0.0218114
1	18015876	chr1:18015876:G:A	G	A	1.67083	0.0133241
1	18038891	chr1:18038891:A:C	A	C	0.406446	0.0303484
1	18076107	chr1:18076107:G:A	G	A	1.26652	0.0319993
1	18117498	chr1:18117498:C:T	C	T	0.360504	0.0262495
1	18148067	chr1:18148067:C:A	C	A	1.39833	0.00169374
1	18153518	chr1:18153518:A:G	A	G	-0.528074	0.0206907
1	18186983	chr1:18186983:C:A	C	A	0.356178	0.0428335
1	18190044	chr1:18190044:T:C	T	C	-0.473491	0.00276945
1	18347175	chr1:18347175:T:G	T	G	1.12855	0.0279539
1	18423455	chr1:18423455:A:C	A	C	-0.52494	0.0087382
1	18450889	chr1:18450889:G:A	G	A	0.764208	0.0365955
1	18464840	chr1:18464840:C:T	C	T	0.35132	0.0273986
1	18467747	chr1:18467747:C:T	C	T	1.17438	0.0337946
1	18529835	chr1:18529835:A:G	A	G	0.773535	0.0114904
1	18617550	chr1:18617550:G:A	G	A	0.57639	0.0174279
1	18666967	chr1:18666967:T:C	T	C	0.354555	0.0222728
1	18695050	chr1:18695050:T:C	T	C	-0.671822	0.0100799
1	18710259	chr1:18710259:C:T	C	T	0.356507	0.0276677
1	18721196	chr1:18721196:T:C	T	C	-0.422995	0.0238239
1	18731236	chr1:18731236:G:A	G	A	-0.332181	0.048571
1	18732774	chr1:18732774:A:G	A	G	0.979037	0.00235852
1	18735127	chr1:18735127:G:A	G	A	-0.783687	0.0299534
1	18769469	chr1:18769469:A:G	A	G	0.350698	0.0200031
1	18826266	chr1:18826266:A:G	A	G	0.418032	0.00908486
1	18850169	chr1:18850169:G:A	G	A	-2.26649	0.0394079
1	18909023	chr1:18909023:T:C	T	C	-0.41507	0.02173
1	18912596	chr1:18912596:C:T	C	T	-0.304889	0.0456134
1	19223265	chr1:19223265:G:A	G	A	0.376687	0.0205483
1	19252082	chr1:19252082:G:A	G	A	0.629805	0.0374835
1	19525084	chr1:19525084:G:T	G	T	0.515969	0.0179206
1	19532313	chr1:19532313:T:C	T	C	0.395467	0.0307042
1	19555067	chr1:19555067:C:T	C	T	-1.10144	0.00622071
1	19647070	chr1:19647070:A:G	A	G	0.37429	0.0358189
1	19742038	chr1:19742038:A:C	A	C	-0.575306	0.00972969
1	19771118	chr1:19771118:G:A	G	A	0.521443	0.044221
1	19787491	chr1:19787491:C:T	C	T	-1.79904	0.00540865
1	19827168	chr1:19827168:T:C	T	C	-0.568695	0.00837632
1	19837625	chr1:19837625:T:G	T	G	-2.50839	0.0175452
1	19845021	chr1:19845021:T:G	T	G	0.340155	0.0291524
1	19964080	chr1:19964080:G:T	G	T	-0.778085	0.0357598
1	19972659	chr1:19972659:T:C	T	C	-0.365467	0.0180878
1	19982805	chr1:19982805:G:A	G	A	0.531583	0.0382883
1	20130847	chr1:20130847:A:G	A	G	0.449862	0.0348245
1	20176690	chr1:20176690:G:A	G	A	0.476154	0.0190464
1	20231089	chr1:20231089:A:G	A	G	0.534608	0.0188367
1	20246036	chr1:20246036:T:C	T	C	0.372386	0.014851
1	20278799	chr1:20278799:G:A	G	A	0.558602	0.0482941
1	20417053	chr1:20417053:C:T	C	T	0.329935	0.0377375
1	20558448	chr1:20558448:T:C	T	C	0.565526	0.0197984
1	20567472	chr1:20567472:G:A	G	A	0.310888	0.0468863
1	20689994	chr1:20689994:C:T	C	T	0.351706	0.0246728
1	20693912	chr1:20693912:C:T	C	T	0.448366	0.0296903
1	20709085	chr1:20709085:T:G	T	G	0.485516	0.0209924
1	20728233	chr1:20728233:A:G	A	G	0.365186	0.0257125
1	21368268	chr1:21368268:G:A	G	A	-0.556984	0.0306339
1	21428086	chr1:21428086:G:A	G	A	0.773628	0.0147019
1	21524097	chr1:21524097:A:G	A	G	0.447406	0.00459067
1	21537412	chr1:21537412:T:C	T	C	0.777428	0.0384897
1	21581111	chr1:21581111:G:A	G	A	0.400352	0.0361327
1	21625531	chr1:21625531:C:T	C	T	0.358236	0.0222676
1	21650762	chr1:21650762:C:T	C	T	-0.470464	0.00564513
1	21652737	chr1:21652737:C:T	C	T	0.484225	0.00241204
1	21653491	chr1:21653491:G:A	G	A	0.853302	0.000450642
1	21953322	chr1:21953322:C:T	C	T	2.39615	0.031828
1	22149323	chr1:22149323:G:A	G	A	-1.69499	0.0423736
1	22153666	chr1:22153666:A:G	A	G	0.352776	0.0241445
1	22173037	chr1:22173037:T:C	T	C	-0.337359	0.0359723
1	22207840	chr1:22207840:G:A	G	A	1.07923	0.0373863
1	22211535	chr1:22211535:G:A	G	A	0.429281	0.00673397
1	22268706	chr1:22268706:G:A	G	A	-0.380213	0.0320585
1	22275761	chr1:22275761:G:A	G	A	0.437284	0.0271925
1	22293453	chr1:22293453:T:C	T	C	0.604045	0.0110967
1	22305095	chr1:22305095:G:T	G	T	0.481653	0.022094
1	22390179	chr1:22390179:A:G	A	G	-0.506083	0.00337562
1	22511356	chr1:22511356:C:T	C	T	0.321504	0.0393653
1	22736559	chr1:22736559:G:A	G	A	-0.504523	0.00339431
1	23169782	chr1:23169782:C:T	C	T	0.567069	0.0136443
1	23678300	chr1:23678300:C:T	C	T	2.06024	0.00749337
1	24949368	chr1:24949368:C:T	C	T	0.327485	0.0442647
1	24983331	chr1:24983331:A:G	A	G	0.42468	0.00860253
1	25033438	chr1:25033438:T:C	T	C	0.491829	0.00606884
1	25039728	chr1:25039728:G:A	G	A	0.3824	0.0228812
1	25376665	chr1:25376665:C:T	C	T	-0.50513	0.04259
1	25677265	chr1:25677265:A:G	A	G	1.22379	0.0283578
1	26081918	chr1:26081918:T:C	T	C	-0.415086	0.0322098
1	26156065	chr1:26156065:T:C	T	C	0.579451	0.000442537
1	26191176	chr1:26191176:T:C	T	C	-0.571056	0.00070855
1	26291283	chr1:26291283:C:T	C	T	-0.424779	0.0122995
1	26333303	chr1:26333303:C:T	C	T	0.52466	0.0017148
1	26360024	chr1:26360024:C:T	C	T	-0.75248	0.0106135
1	26383013	chr1:26383013:T:C	T	C	0.333501	0.0376598
1	26394796	chr1:26394796:G:A	G	A	0.43336	0.00575339
1	26582566	chr1:26582566:A:G	A	G	-1.07392	0.0146241
1	26715223	chr1:26715223:T:C	T	C	-0.34739	0.0316589
1	27078731	chr1:27078731:G:A	G	A	-0.771842	0.00202143
1	27091426	chr1:27091426:C:T	C	T	0.625491	0.0161298
1	27201720	chr1:27201720:T:C	T	C	-0.309168	0.0495463
1	27353463	chr1:27353463:G:A	G	A	-0.466341	0.00551871
1	27598166	chr1:27598166:G:A	G	A	-1.03103	0.0424886
1	27982165	chr1:27982165:C:A	C	A	-0.437205	0.0188347
1	28196727	chr1:28196727:C:T	C	T	0.505244	0.036091
1	28597354	chr1:28597354:G:A	G	A	-0.663706	0.0485819
1	28863626	chr1:28863626:G:A	G	A	0.331386	0.0270034
1	29346600	chr1:29346600:A:G	A	G	0.442237	0.0193655
1	29355519	chr1:29355519:T:C	T	C	0.331439	0.0350379
1	29376895	chr1:29376895:T:C	T	C	-0.576484	0.000265078
1	29421536	chr1:29421536:C:T	C	T	1.65866	0.0143663
1	29454245	chr1:29454245:C:T	C	T	0.385889	0.0472991
1	29484193	chr1:29484193:A:G	A	G	-0.647076	0.0277939
1	29559291	chr1:29559291:A:G	A	G	-0.372994	0.0146693
1	29637435	chr1:29637435:A:G	A	G	0.563103	0.0134138
1	29679273	chr1:29679273:G:A	G	A	0.63089	0.0085513
1	29749450	chr1:29749450:G:A	G	A	-0.336783	0.0262641
1	29804938	chr1:29804938:A:G	A	G	-0.477661	0.00655323
1	29893431	chr1:29893431:G:A	G	A	-0.331059	0.0333984
1	29910561	chr1:29910561:G:A	G	A	-0.470891	0.0170468
1	30053981	chr1:30053981:C:T	C	T	-1.33436	0.0478035
1	30170278	chr1:30170278:A:G	A	G	-0.458226	0.0444927
1	30175130	chr1:30175130:T:C	T	C	0.374253	0.0417386
1	30323658	chr1:30323658:A:G	A	G	-2.3623	0.0310604
1	30332174	chr1:30332174:A:G	A	G	0.41557	0.0288667
1	30602906	chr1:30602906:C:T	C	T	-0.388292	0.00909119
1	30669964	chr1:30669964:T:C	T	C	-0.380556	0.0439031
1	30745432	chr1:30745432:C:A	C	A	-0.723777	0.0451328
1	30872900	chr1:30872900:C:T	C	T	0.396833	0.0433126
1	31073471	chr1:31073471:T:C	T	C	0.33802	0.0184814
1	31189074	chr1:31189074:A:G	A	G	0.363681	0.0334893
1	31231731	chr1:31231731:A:C	A	C	-0.439506	0.0225807
1	31537450	chr1:31537450:T:C	T	C	1.89199	0.0172545
1	31762403	chr1:31762403:G:A	G	A	-0.379735	0.0323114
1	32442732	chr1:32442732:C:T	C	T	-0.472278	0.0433835
1	32981277	chr1:32981277:T:G	T	G	0.41046	0.0198149
1	33026908	chr1:33026908:C:T	C	T	-0.437673	0.0347013
1	33517360	chr1:33517360:C:T	C	T	0.507707	0.0124754
1	33560103	chr1:33560103:T:C	T	C	-0.614251	0.0213839
1	33795347	chr1:33795347:C:T	C	T	-0.869408	0.0107097
1	33919094	chr1:33919094:C:T	C	T	0.329281	0.0390354
1	34037934	chr1:34037934:T:C	T	C	0.881546	0.00324749
1	34072879	chr1:34072879:G:A	G	A	0.500729	0.0494467
1	34150301	chr1:34150301:T:C	T	C	0.823796	0.035658
1	34349852	chr1:34349852:G:A	G	A	0.38906	0.0289226
1	34369536	chr1:34369536:T:G	T	G	-0.313074	0.0419442
1	34403850	chr1:34403850:G:T	G	T	0.427647	0.0294023
1	34421143	chr1:34421143:C:T	C	T	-0.613088	0.0431828
1	34442488	chr1:34442488:G:A	G	A	0.48308	0.00868724
1	34488255	chr1:34488255:T:G	T	G	0.426214	0.0063465
1	34595177	chr1:34595177:C:T	C	T	-0.414889	0.021496
1	34732965	chr1:34732965:A:G	A	G	-0.302794	0.0414236
1	34735764	chr1:34735764:G:A	G	A	-0.439484	0.0313947
1	34758280	chr1:34758280:G:A	G	A	0.363754	0.032319
1	34898856	chr1:34898856:T:G	T	G	-0.511019	0.0072418
1	35491196	chr1:35491196:C:T	C	T	-1.47531	0.00353279
1	35808004	chr1:35808004:G:A	G	A	-2.48763	0.0211511
1	36121728	chr1:36121728:G:A	G	A	-0.476003	0.044946
1	36126601	chr1:36126601:G:T	G	T	0.799408	0.027868
1	36553118	chr1:36553118:T:C	T	C	0.43954	0.008885
1	36686870	chr1:36686870:C:T	C	T	-0.659941	0.0278411
1	36859334	chr1:36859334:T:C	T	C	0.558796	0.000952635
1	36926188	chr1:36926188:C:T	C	T	-0.507307	0.0274743
1	37075721	chr1:37075721:C:T	C	T	0.634221	0.00277364
1	37113626	chr1:37113626:A:G	A	G	0.47073	0.01001
1	37198217	chr1:37198217:G:A	G	A	0.349144	0.0387623
1	37251618	chr1:37251618:T:C	T	C	-1.30415	0.012315
1	37311207	chr1:37311207:G:T	G	T	0.832164	0.00637647
1	37389275	chr1:37389275:T:C	T	C	0.93965	0.0102543
1	37512170	chr1:37512170:G:A	G	A	-0.521817	0.0176078
1	37661482	chr1:37661482:A:G	A	G	-0.338116	0.0496108
1	38134710	chr1:38134710:G:A	G	A	-0.729132	0.0040657
1	38149195	chr1:38149195:G:A	G	A	0.489329	0.0075396
1	38215354	chr1:38215354:T:C	T	C	0.327994	0.0454875
1	38257872	chr1:38257872:C:A	C	A	-0.690778	0.00467033
1	38329106	chr1:38329106:G:A	G	A	-0.463434	0.00259926
1	38381636	chr1:38381636:C:T	C	T	0.731652	0.021437
1	38411532	chr1:38411532:T:C	T	C	0.483858	0.0173096
1	38483871	chr1:38483871:C:T	C	T	0.871964	0.0269684
1	38604243	chr1:38604243:G:T	G	T	0.446907	0.00522696
1	38674937	chr1:38674937:C:T	C	T	0.361897	0.0493863
1	38787808	chr1:38787808:C:T	C	T	0.559213	0.0406735
1	38962791	chr1:38962791:T:C	T	C	-0.98923	0.0136178
1	39022497	chr1:39022497:T:G	T	G	-0.925538	0.0139318
1	39100908	chr1:39100908:A:G	A	G	0.382093	0.0349057
1	39696061	chr1:39696061:A:C	A	C	0.673636	0.0378096
1	39754821	chr1:39754821:G:T	G	T	-1.04338	0.0489577
1	40146527	chr1:40146527:G:A	G	A	-0.478769	0.0272786
1	40476494	chr1:40476494:C:T	C	T	0.8384	0.036121
1	40585561	chr1:40585561:T:C	T	C	-0.769493	0.0102046
1	40706867	chr1:40706867:T:C	T	C	-0.432981	0.0188988
1	40787513	chr1:40787513:A:G	A	G	0.692971	0.0288513
1	40802894	chr1:40802894:A:G	A	G	0.893626	0.0201975
1	40863478	chr1:40863478:G:A	G	A	0.664702	0.0176865
1	40899773	chr1:40899773:G:T	G	T	0.407141	0.0101738
1	40929049	chr1:40929049:G:A	G	A	-0.41555	0.0305528
1	40955868	chr1:40955868:C:T	C	T	-0.552894	0.0241893
1	41028550	chr1:41028550:G:T	G	T	0.352281	0.0202251
1	41418736	chr1:41418736:C:T	C	T	0.730588	0.0141896
1	41421235	chr1:41421235:A:G	A	G	1.28932	0.0222291
1	41432203	chr1:41432203:T:C	T	C	-0.458235	0.00428471
1	41481664	chr1:41481664:G:A	G	A	0.67698	0.0280157
1	41492431	chr1:41492431:T:C	T	C	0.366239	0.0385124
1	41510546	chr1:41510546:G:A	G	A	-1.1164	0.0142799
1	41778207	chr1:41778207:C:T	C	T	0.647744	4.84832e-05
1	41779788	chr1:41779788:T:G	T	G	-0.57646	0.00772398
1	41834530	chr1:41834530:G:A	G	A	0.431555	0.00691355
1	42436892	chr1:42436892:T:C	T	C	-0.675044	0.0398525
1	42584959	chr1:42584959:G:T	G	T	-0.460723	0.0100626
1	42647720	chr1:42647720:G:A	G	A	0.655147	0.00875638
1	42666942	chr1:42666942:T:C	T	C	-0.300281	0.0480866
1	42735184	chr1:42735184:G:A	G	A	0.620127	0.00809531
1	42768751	chr1:42768751:G:A	G	A	2.23027	0.00395666
1	42814089	chr1:42814089:T:C	T	C	-2.64323	0.0172923
1	42855652	chr1:42855652:G:A	G	A	-0.537259	0.00191014
1	43509567	chr1:43509567:G:A	G	A	0.41526	0.00933405
1	43595361	chr1:43595361:T:C	T	C	0.346989	0.0431838
1	43606125	chr1:43606125:G:T	G	T	0.475979	0.00372882
1	44115294	chr1:44115294:C:A	C	A	0.444323	0.031978
1	44442292	chr1:44442292:G:A	G	A	-0.848756	0.00547641
1	44452273	chr1:44452273:G:T	G	T	-0.403091	0.0147832
1	44457801	chr1:44457801:A:G	A	G	0.436835	0.0246636
1	44617685	chr1:44617685:T:C	T	C	-0.32173	0.0378807
1	44628049	chr1:44628049:T:C	T	C	-2.35747	0.0417253
1	45243144	chr1:45243144:G:A	G	A	-0.516713	0.0335578
1	45496465	chr1:45496465:T:C	T	C	-2.10896	0.0130813
1	46432666	chr1:46432666:A:G	A	G	-0.323074	0.0299801
1	46470405	chr1:46470405:A:G	A	G	0.331338	0.0293181
1	46507782	chr1:46507782:C:T	C	T	-2.33209	0.0390786
1	47921093	chr1:47921093:A:G	A	G	-1.03322	0.0303951
1	48080523	chr1:48080523:T:C	T	C	0.374595	0.0160316
1	48519756	chr1:48519756:C:T	C	T	0.339708	0.0297478
1	48545702	chr1:48545702:G:T	G	T	-0.386565	0.0122298
1	48551623	chr1:48551623:G:A	G	A	0.473423	0.00576313
1	48572400	chr1:48572400:A:C	A	C	-0.425023	0.0292612
1	48881156	chr1:48881156:C:T	C	T	-0.69964	0.0103739
1	50659488	chr1:50659488:T:C	T	C	0.468467	0.0378851
1	51182285	chr1:51182285:G:A	G	A	-0.508544	0.0479759
1	51333468	chr1:51333468:G:A	G	A	0.531772	0.0103257
1	51880675	chr1:51880675:T:C	T	C	-0.387283	0.0288642
1	52330578	chr1:52330578:C:T	C	T	-0.4896	0.00893818
1	52386057	chr1:52386057:G:A	G	A	0.449001	0.00557205
1	52601914	chr1:52601914:T:C	T	C	0.31803	0.0396539
1	52662578	chr1:52662578:A:G	A	G	0.35902	0.0176978
1	52750120	chr1:52750120:C:T	C	T	1.02476	0.012641
1	52931178	chr1:52931178:G:A	G	A	0.436097	0.00635726
1	53016854	chr1:53016854:T:C	T	C	1.70696	0.034913
1	53099456	chr1:53099456:C:T	C	T	-0.470602	0.00199296
1	53113730	chr1:53113730:C:T	C	T	-1.20888	0.00138283
1	53161701	chr1:53161701:G:A	G	A	-0.412773	0.0199099
1	53162389	chr1:53162389:G:A	G	A	-0.515244	0.0209973
1	53185857	chr1:53185857:G:A	G	A	1.14787	0.00865051
1	53298963	chr1:53298963:G:A	G	A	0.607199	0.00253938
1	53371597	chr1:53371597:C:T	C	T	-0.338406	0.0490786
1	53379768	chr1:53379768:T:C	T	C	-0.522476	0.0327349
1	53382815	chr1:53382815:G:A	G	A	0.767239	0.0199647
1	53494815	chr1:53494815:A:G	A	G	-0.379719	0.037878
1	53529842	chr1:53529842:G:A	G	A	1.81154	0.0250981
1	53656303	chr1:53656303:G:A	G	A	0.547016	0.000542883
1	53902580	chr1:53902580:A:C	A	C	0.316024	0.0490607
1	54077129	chr1:54077129:A:G	A	G	-0.529086	0.0342706
1	54116196	chr1:54116196:T:C	T	C	0.398659	0.0145186
1	54198328	chr1:54198328:T:C	T	C	0.462773	0.0458731
1	54437957	chr1:54437957:C:A	C	A	-0.934695	0.0142125
1	54633749	chr1:54633749:C:A	C	A	-1.31397	0.0214514
1	54683706	chr1:54683706:G:A	G	A	0.402876	0.0181932
1	54781424	chr1:54781424:G:A	G	A	-0.431144	0.0381007
1	54795717	chr1:54795717:T:C	T	C	-0.341269	0.0491907
1	54800518	chr1:54800518:G:T	G	T	-0.863322	0.0158731
1	54805822	chr1:54805822:G:T	G	T	0.569024	0.000375348
1	54916499	chr1:54916499:G:T	G	T	0.36505	0.0370565
1	55031188	chr1:55031188:G:A	G	A	0.975327	0.0379436
1	55197007	chr1:55197007:C:T	C	T	0.705554	0.0345057
1	55258144	chr1:55258144:G:A	G	A	-0.391984	0.0116612
1	55327252	chr1:55327252:G:A	G	A	0.451694	0.00728535
1	55732441	chr1:55732441:A:C	A	C	0.499703	0.00219053
1	55733890	chr1:55733890:G:T	G	T	1.21108	0.0278173
1	56237833	chr1:56237833:G:T	G	T	0.775775	0.01083
1	56247961	chr1:56247961:T:C	T	C	1.21135	0.0173997
1	56302419	chr1:56302419:T:C	T	C	0.35447	0.0280767
1	56574445	chr1:56574445:A:G	A	G	0.314054	0.0408176
1	56715565	chr1:56715565:T:C	T	C	0.341682	0.0373315
1	56949527	chr1:56949527:C:T	C	T	-0.861082	0.0313935
1	57424810	chr1:57424810:A:C	A	C	-0.612118	0.0189104
1	57468362	chr1:57468362:C:T	C	T	-0.741623	0.0349683
1	57510577	chr1:57510577:T:G	T	G	0.428604	0.0436226
1	57620814	chr1:57620814:C:T	C	T	-0.371922	0.0261574
1	57905275	chr1:57905275:C:T	C	T	-0.485013	0.0115297
1	58007343	chr1:58007343:C:T	C	T	-1.32001	0.014996
1	58023266	chr1:58023266:A:C	A	C	-0.566485	0.0288681
1	58054434	chr1:58054434:T:C	T	C	0.934418	0.0192078
1	58059553	chr1:58059553:C:A	C	A	0.522045	0.0189631
1	58225852	chr1:58225852:C:T	C	T	0.330806	0.0486281
1	58373515	chr1:58373515:C:T	C	T	-0.394082	0.0113134
1	58434317	chr1:58434317:A:G	A	G	0.410894	0.0106676
1	59142353	chr1:59142353:T:G	T	G	-0.430065	0.0218276
1	59498167	chr1:59498167:T:C	T	C	0.310162	0.0364902
1	59518213	chr1:59518213:G:A	G	A	0.955694	0.0215559
1	59558269	chr1:59558269:C:T	C	T	-0.361034	0.0207528
1	59601375	chr1:59601375:C:T	C	T	-0.893815	0.00307996
1	59709279	chr1:59709279:A:G	A	G	-0.429936	0.0382395
1	59717539	chr1:59717539:G:A	G	A	0.354354	0.0202088
1	59727027	chr1:59727027:C:A	C	A	-0.607981	0.0023618
1	59927744	chr1:59927744:T:C	T	C	-0.360478	0.0316863
1	59960722	chr1:59960722:A:G	A	G	0.600487	0.0322414
1	60209296	chr1:60209296:G:A	G	A	0.38059	0.0116759
1	60272662	chr1:60272662:T:C	T	C	-0.668887	0.00124771
1	60357551	chr1:60357551:G:A	G	A	-1.33872	0.0410628
1	60404051	chr1:60404051:A:G	A	G	-0.63619	0.00850371
1	60539850	chr1:60539850:A:G	A	G	-0.748416	0.022487
1	60666256	chr1:60666256:G:A	G	A	-1.58112	0.0432162
1	60668351	chr1:60668351:G:A	G	A	-0.341472	0.0271251
1	60679543	chr1:60679543:T:C	T	C	0.419213	0.0388526
1	60841265	chr1:60841265:G:A	G	A	-1.8653	0.0171369
1	60894507	chr1:60894507:T:C	T	C	-1.48334	0.000755508
1	60900165	chr1:60900165:T:C	T	C	0.743998	0.0391231
1	60929432	chr1:60929432:C:T	C	T	-0.480858	0.00266303
1	60930977	chr1:60930977:T:C	T	C	-0.363197	0.0276979
1	60941060	chr1:60941060:T:C	T	C	-0.453485	0.0219316
1	60969403	chr1:60969403:T:C	T	C	-0.627362	0.00230739
1	60981220	chr1:60981220:G:A	G	A	-0.796533	0.0152228
1	60997729	chr1:60997729:C:T	C	T	1.03243	0.0416146
1	61004646	chr1:61004646:G:T	G	T	-0.661771	0.00211639
1	61213611	chr1:61213611:A:G	A	G	0.386492	0.0110135
1	61320907	chr1:61320907:T:G	T	G	-0.6784	0.0465428
1	61518688	chr1:61518688:G:A	G	A	-0.433323	0.00658045
1	61522169	chr1:61522169:G:T	G	T	-0.448865	0.0125416
1	61532544	chr1:61532544:C:T	C	T	0.580311	0.010806
1	61554414	chr1:61554414:C:T	C	T	-1.22943	0.0101455
1	61569466	chr1:61569466:C:T	C	T	0.313383	0.0362614
1	61592990	chr1:61592990:C:T	C	T	-0.707057	0.00769665
1	61600579	chr1:61600579:G:A	G	A	0.515535	0.0233767
1	61623589	chr1:61623589:T:C	T	C	0.425957	0.0160603
1	61664768	chr1:61664768:G:A	G	A	-0.390887	0.0121996
1	61699540	chr1:61699540:A:C	A	C	-0.421056	0.0201182
1	61895893	chr1:61895893:T:C	T	C	-0.4383	0.0228276
1	61914551	chr1:61914551:G:T	G	T	0.450347	0.0140651
1	62070049	chr1:62070049:G:A	G	A	-1.76686	0.0262993
1	62113765	chr1:62113765:A:G	A	G	-0.413056	0.0151947
1	62213089	chr1:62213089:T:C	T	C	-0.464726	0.00387689
1	62247797	chr1:62247797:T:C	T	C	0.502171	0.00110165
1	62261924	chr1:62261924:T:C	T	C	0.541219	0.00125031
1	62311307	chr1:62311307:T:G	T	G	-0.403248	0.0470044
1	62313086	chr1:62313086:A:G	A	G	-0.352823	0.0458722
1	62324878	chr1:62324878:G:A	G	A	0.51926	0.0257258
1	62974167	chr1:62974167:G:A	G	A	-0.561325	0.0455373
1	62980840	chr1:62980840:A:G	A	G	-0.36554	0.0183304
1	63036470	chr1:63036470:G:T	G	T	0.401305	0.0399928
1	63084829	chr1:63084829:T:G	T	G	-0.432641	0.020367
1	63109616	chr1:63109616:T:C	T	C	-0.6017	0.00257483
1	63155737	chr1:63155737:T:C	T	C	0.378914	0.01928
1	63324832	chr1:63324832:T:C	T	C	-0.474253	0.0279245
1	63626068	chr1:63626068:A:G	A	G	-0.310358	0.0386211
1	63633652	chr1:63633652:T:G	T	G	-0.439421	0.00455143
1	63799868	chr1:63799868:C:T	C	T	0.434058	0.0296706
1	63876061	chr1:63876061:G:A	G	A	-2.25238	0.0381773
1	64132716	chr1:64132716:C:T	C	T	0.454668	0.0182893
1	64215072	chr1:64215072:A:G	A	G	-0.450113	0.021821
1	64216664	chr1:64216664:A:G	A	G	0.546196	0.0297627
1	64493520	chr1:64493520:A:G	A	G	-0.595794	0.0287138
1	64506220	chr1:64506220:T:C	T	C	-0.633836	0.00130836
1	64620259	chr1:64620259:A:G	A	G	0.491328	0.00390288
1	64873092	chr1:64873092:C:T	C	T	0.501368	0.0408676
1	65099384	chr1:65099384:T:G	T	G	-0.50471	0.0367537
1	65484373	chr1:65484373:T:C	T	C	0.572965	0.00427928
1	65513597	chr1:65513597:T:C	T	C	-0.740343	0.0127489
1	65933952	chr1:65933952:A:G	A	G	1.0311	0.023421
1	66099316	chr1:66099316:G:T	G	T	-0.631769	0.0244953
1	66320534	chr1:66320534:G:A	G	A	1.62883	0.0468358
1	66467653	chr1:66467653:A:G	A	G	-0.349475	0.0183381
1	66814832	chr1:66814832:G:A	G	A	-0.553776	0.0137557
1	66834840	chr1:66834840:G:A	G	A	0.750089	0.00946528
1	66891716	chr1:66891716:G:A	G	A	0.961012	0.0336774
1	67396783	chr1:67396783:G:T	G	T	1.54698	0.0487238
1	67473099	chr1:67473099:C:T	C	T	0.466981	0.0136395
1	67503934	chr1:67503934:C:A	C	A	0.596191	0.0408108
1	67510937	chr1:67510937:C:T	C	T	-0.497161	0.0269908
1	67622756	chr1:67622756:A:G	A	G	-0.361713	0.0324201
1	67927839	chr1:67927839:C:A	C	A	-0.379109	0.0339502
1	68177408	chr1:68177408:T:C	T	C	-0.446151	0.003657
1	68199340	chr1:68199340:T:C	T	C	-0.317245	0.0463295
1	68261564	chr1:68261564:G:A	G	A	0.723249	0.0325102
1	68313441	chr1:68313441:C:A	C	A	-0.364288	0.0271037
1	68332019	chr1:68332019:G:A	G	A	0.844377	0.00446292
1	68451599	chr1:68451599:A:G	A	G	0.733984	0.00487706
1	68531635	chr1:68531635:T:C	T	C	-0.332899	0.0280169
1	68761203	chr1:68761203:C:A	C	A	0.525445	0.0200694
1	68975731	chr1:68975731:G:A	G	A	0.44291	0.0116178
1	68977781	chr1:68977781:C:T	C	T	0.498564	0.0152768
1	69050956	chr1:69050956:G:A	G	A	0.440481	0.00482735
1	69138211	chr1:69138211:C:T	C	T	-1.15819	0.000102192
1	69204614	chr1:69204614:A:G	A	G	0.531188	0.00785941
1	69225656	chr1:69225656:A:G	A	G	0.548365	0.0333532
1	69283600	chr1:69283600:C:A	C	A	1.23025	0.0142969
1	69321239	chr1:69321239:A:G	A	G	-0.41077	0.0162845
1	69460575	chr1:69460575:A:G	A	G	0.363266	0.0211993
1	69512285	chr1:69512285:T:C	T	C	-0.391133	0.0223932
1	69525994	chr1:69525994:T:C	T	C	-0.463884	0.00408342
1	69622515	chr1:69622515:G:T	G	T	-0.517286	0.0313527
1	69690267	chr1:69690267:T:G	T	G	-1.8809	0.000198563
1	69711518	chr1:69711518:G:A	G	A	-0.418837	0.00639185
1	70087091	chr1:70087091:C:T	C	T	0.377783	0.0189474
1	70254810	chr1:70254810:G:A	G	A	-0.372789	0.0447408
1	70439117	chr1:70439117:G:T	G	T	-0.387278	0.0241712
1	70496511	chr1:70496511:G:A	G	A	-0.539723	0.0322798
1	70532128	chr1:70532128:G:A	G	A	-0.872726	0.0303645
1	70665656	chr1:70665656:C:T	C	T	0.349489	0.0383866
1	70816666	chr1:70816666:T:G	T	G	-0.375572	0.0209714
1	70855343	chr1:70855343:G:A	G	A	-0.49617	0.0339476
1	70891754	chr1:70891754:G:T	G	T	-1.71074	0.00840413
1	70978397	chr1:70978397:A:G	A	G	-0.732427	0.00540731
1	71023186	chr1:71023186:A:G	A	G	0.354957	0.0190408
1	71452436	chr1:71452436:C:T	C	T	0.362832	0.0126455
1	71671448	chr1:71671448:A:G	A	G	0.804172	0.0147141
1	72256901	chr1:72256901:A:G	A	G	-1.82034	0.0259323
1	72383395	chr1:72383395:G:A	G	A	-0.477892	0.0374654
1	73697164	chr1:73697164:T:C	T	C	-0.687803	0.0483327
1	74007939	chr1:74007939:C:T	C	T	0.572584	0.0428857
1	74113973	chr1:74113973:A:C	A	C	0.666093	0.0496996
1	74391311	chr1:74391311:T:C	T	C	1.27524	0.0031521
1	74477781	chr1:74477781:A:G	A	G	-0.449315	0.00280221
1	75097607	chr1:75097607:A:G	A	G	-0.482237	0.00358667
1	75129466	chr1:75129466:C:T	C	T	0.698731	0.0115065
1	75299908	chr1:75299908:C:T	C	T	0.308051	0.0441608
1	75384052	chr1:75384052:G:A	G	A	-0.421773	0.033884
1	75387048	chr1:75387048:C:T	C	T	-1.32998	0.0233468
1	75471744	chr1:75471744:C:T	C	T	0.384217	0.036959
1	76031348	chr1:76031348:T:C	T	C	0.295677	0.0492761
1	76161085	chr1:76161085:G:A	G	A	-0.553892	0.00336889
1	76223334	chr1:76223334:A:G	A	G	0.403682	0.0421182
1	76299408	chr1:76299408:T:C	T	C	0.675925	0.0360071
1	76402168	chr1:76402168:G:A	G	A	0.578023	0.00506452
1	76409931	chr1:76409931:T:C	T	C	-0.768941	0.00523589
1	76676153	chr1:76676153:G:T	G	T	-0.475926	0.0399183
1	76774689	chr1:76774689:T:C	T	C	0.30669	0.0390371
1	76858612	chr1:76858612:C:T	C	T	-0.465266	0.0297436
1	76859603	chr1:76859603:A:G	A	G	-0.395757	0.00921305
1	77005463	chr1:77005463:G:A	G	A	-0.992534	0.0307728
1	77373795	chr1:77373795:T:G	T	G	0.380692	0.0260966
1	77439777	chr1:77439777:T:C	T	C	0.492632	0.00429564
1	77492420	chr1:77492420:A:G	A	G	0.455923	0.0121632
1	77587357	chr1:77587357:C:T	C	T	1.09581	0.0426355
1	77592385	chr1:77592385:C:T	C	T	1.2013	0.0456276
1	77702220	chr1:77702220:C:T	C	T	1.0616	0.0225565
1	77959248	chr1:77959248:A:G	A	G	1.31636	0.0124987
1	77971870	chr1:77971870:C:T	C	T	-0.881046	0.0256049
1	78251170	chr1:78251170:T:C	T	C	-0.382644	0.0434344
1	78489756	chr1:78489756:A:C	A	C	-0.582382	0.0176161
1	78495900	chr1:78495900:T:C	T	C	-0.370843	0.018378
1	79100295	chr1:79100295:A:G	A	G	-0.816674	0.0374181
1	79128235	chr1:79128235:C:A	C	A	-0.60091	0.014443
1	79173277	chr1:79173277:T:C	T	C	1.50972	0.00518132
1	79199175	chr1:79199175:A:C	A	C	0.405542	0.0277245
1	79269973	chr1:79269973:G:A	G	A	-0.406159	0.0172299
1	79426394	chr1:79426394:A:G	A	G	-0.690421	0.0375947
1	79890018	chr1:79890018:G:T	G	T	-0.671055	0.0413306
1	79951789	chr1:79951789:A:G	A	G	1.45904	0.0340629
1	79954185	chr1:79954185:G:T	G	T	-1.30434	0.0141146
1	80076393	chr1:80076393:G:A	G	A	0.843997	0.0242823
1	80385245	chr1:80385245:A:G	A	G	0.707606	0.0250221
1	80587979	chr1:80587979:T:C	T	C	-0.511625	0.0241684
1	80633504	chr1:80633504:A:C	A	C	0.392731	0.0315349
1	80638335	chr1:80638335:G:A	G	A	-1.79191	0.0233028
1	80704776	chr1:80704776:G:A	G	A	0.818639	0.0128577
1	80714368	chr1:80714368:T:C	T	C	-0.348687	0.0351572
1	80787946	chr1:80787946:A:G	A	G	0.302859	0.0482127
1	81642623	chr1:81642623:T:C	T	C	0.35809	0.0431856
1	81752608	chr1:81752608:A:G	A	G	-0.560199	0.017396
1	81765073	chr1:81765073:A:G	A	G	-0.737427	0.000956503
1	81777258	chr1:81777258:A:C	A	C	0.522448	0.0457032
1	82359433	chr1:82359433:G:A	G	A	0.627772	0.00970197
1	82488677	chr1:82488677:G:A	G	A	0.327854	0.0289315
1	82494492	chr1:82494492:A:G	A	G	-0.874354	0.0354992
1	82500148	chr1:82500148:G:A	G	A	0.346794	0.0376915
1	82630569	chr1:82630569:G:A	G	A	0.494383	0.00630183
1	82888290	chr1:82888290:G:A	G	A	-0.921706	0.00280083
1	82899662	chr1:82899662:T:C	T	C	0.407504	0.00977569
1	83003541	chr1:83003541:T:G	T	G	-0.729121	0.00332797
1	83045423	chr1:83045423:A:G	A	G	-0.407914	0.0384614
1	83365862	chr1:83365862:G:A	G	A	0.39057	0.0331855
1	83686861	chr1:83686861:G:A	G	A	-0.867362	0.0254925
1	83697202	chr1:83697202:G:A	G	A	0.649072	0.0224211
1	83785606	chr1:83785606:G:T	G	T	0.587083	0.00963191
1	83859446	chr1:83859446:C:T	C	T	-0.423717	0.00963702
1	83961369	chr1:83961369:A:C	A	C	-0.514119	0.00131767
1	83997936	chr1:83997936:T:C	T	C	0.402398	0.0391402
1	84235083	chr1:84235083:C:T	C	T	-1.62633	0.0115198
1	84377917	chr1:84377917:C:T	C	T	-0.369656	0.0151323
1	84415412	chr1:84415412:G:A	G	A	-0.350362	0.0234836
1	84507592	chr1:84507592:G:T	G	T	-0.615793	0.0106088
1	84589215	chr1:84589215:A:G	A	G	-1.25149	0.0241051
1	84687369	chr1:84687369:C:T	C	T	0.29657	0.0458255
1	84740646	chr1:84740646:A:G	A	G	0.751298	0.0308392
1	84948082	chr1:84948082:T:C	T	C	-0.414246	0.0276231
1	85055162	chr1:85055162:T:C	T	C	0.44748	0.0126377
1	85076606	chr1:85076606:G:A	G	A	-1.66524	0.0104323
1	85232175	chr1:85232175:T:C	T	C	0.327866	0.0275032
1	85493289	chr1:85493289:A:G	A	G	1.65519	0.0397847
1	85611026	chr1:85611026:T:C	T	C	0.602064	0.0398691
1	85847019	chr1:85847019:C:T	C	T	-0.462568	0.01931
1	85856627	chr1:85856627:G:A	G	A	0.867385	0.0418947
1	86032179	chr1:86032179:C:T	C	T	0.316114	0.0356465
1	86255483	chr1:86255483:C:T	C	T	0.813842	0.0390137
1	86506568	chr1:86506568:T:C	T	C	0.610394	0.0202925
1	86867642	chr1:86867642:T:C	T	C	1.30916	0.0321589
1	87278122	chr1:87278122:G:A	G	A	0.4454	0.0243428
1	87336992	chr1:87336992:G:A	G	A	0.946491	0.0320586
1	87343371	chr1:87343371:A:G	A	G	2.35725	0.0420527
1	87373854	chr1:87373854:C:T	C	T	1.07699	0.0388016
1	87921600	chr1:87921600:T:C	T	C	0.812455	0.0471624
1	88022679	chr1:88022679:A:C	A	C	0.357113	0.0290198
1	88163037	chr1:88163037:G:A	G	A	0.957385	0.0226196
1	88177936	chr1:88177936:C:A	C	A	0.382395	0.0282085
1	88556357	chr1:88556357:C:T	C	T	-0.442762	0.0397494
1	88803657	chr1:88803657:G:A	G	A	-0.346714	0.0273912
1	88896698	chr1:88896698:G:T	G	T	-0.588885	0.0175538
1	89370569	chr1:89370569:A:G	A	G	-0.572759	0.0330195
1	89454519	chr1:89454519:C:A	C	A	1.69083	0.0359127
1	89570227	chr1:89570227:G:A	G	A	-0.477135	0.00092927
1	89599912	chr1:89599912:C:T	C	T	0.424091	0.0324621
1	89858208	chr1:89858208:G:A	G	A	0.636745	0.0150055
1	90076723	chr1:90076723:A:G	A	G	-0.345943	0.0325844
1	90102792	chr1:90102792:A:G	A	G	-0.635862	0.00657912
1	90192493	chr1:90192493:G:T	G	T	-0.397038	0.0174066
1	90196153	chr1:90196153:C:T	C	T	0.306059	0.0359766
1	90352258	chr1:90352258:T:G	T	G	-0.574093	0.0126911
1	90527685	chr1:90527685:C:T	C	T	-0.40871	0.0364319
1	90642424	chr1:90642424:A:G	A	G	0.722908	0.0455547
1	91410083	chr1:91410083:T:G	T	G	-0.384651	0.0347238
1	91517617	chr1:91517617:G:A	G	A	0.460321	0.00258403
1	91615286	chr1:91615286:G:A	G	A	0.864175	0.0321053
1	91633735	chr1:91633735:T:G	T	G	-0.335589	0.0224431
1	91719257	chr1:91719257:G:T	G	T	0.337239	0.0361068
1	91747678	chr1:91747678:A:G	A	G	-0.418808	0.00545301
1	91753203	chr1:91753203:T:C	T	C	-0.878098	0.00556507
1	91770250	chr1:91770250:G:A	G	A	1.12149	0.00269073
1	91820611	chr1:91820611:A:G	A	G	-1.03658	0.0220374
1	93013914	chr1:93013914:C:T	C	T	0.385062	0.0271713
1	94059269	chr1:94059269:A:G	A	G	0.713913	0.0358895
1	94536434	chr1:94536434:C:T	C	T	0.389078	0.010435
1	94600313	chr1:94600313:C:T	C	T	-0.396739	0.0147741
1	94699409	chr1:94699409:C:A	C	A	0.48847	0.0462402
1	94724647	chr1:94724647:G:A	G	A	-0.443343	0.00587424
1	94756468	chr1:94756468:G:A	G	A	0.454912	0.00626897
1	94783750	chr1:94783750:C:T	C	T	-0.404521	0.0394522
1	94845776	chr1:94845776:G:A	G	A	0.730807	0.000159715
1	94852713	chr1:94852713:A:G	A	G	0.326826	0.0275838
1	94927828	chr1:94927828:C:A	C	A	-0.888539	0.024022
1	94961692	chr1:94961692:T:C	T	C	0.344449	0.046677
1	94969605	chr1:94969605:C:A	C	A	-0.425168	0.0416203
1	94988171	chr1:94988171:C:T	C	T	0.450171	0.0315825
1	95078060	chr1:95078060:T:G	T	G	0.474671	0.00877288
1	95129131	chr1:95129131:T:C	T	C	-0.38181	0.0204418
1	95253623	chr1:95253623:T:G	T	G	0.775332	0.0259482
1	95369568	chr1:95369568:A:G	A	G	-0.45142	0.006888
1	95783472	chr1:95783472:A:G	A	G	0.356313	0.0251349
1	96109073	chr1:96109073:C:T	C	T	0.765707	0.00294963
1	96560152	chr1:96560152:C:T	C	T	0.330305	0.0280934
1	96997121	chr1:96997121:T:C	T	C	-0.373463	0.0181775
1	97087382	chr1:97087382:A:C	A	C	0.443681	0.00515426
1	97156710	chr1:97156710:T:G	T	G	0.454989	0.0230034
1	97183653	chr1:97183653:G:T	G	T	-0.546377	0.0283414
1	98400067	chr1:98400067:T:C	T	C	-0.624334	0.0349696
1	98498942	chr1:98498942:A:G	A	G	-0.572827	0.00875276
1	98619012	chr1:98619012:A:C	A	C	0.529103	0.023278
1	98669445	chr1:98669445:T:C	T	C	-0.727545	0.0244959
1	98683814	chr1:98683814:C:T	C	T	1.3925	0.0447925
1	98749985	chr1:98749985:C:T	C	T	0.381472	0.0138427
1	99205748	chr1:99205748:T:G	T	G	-0.512458	0.021319
1	99322320	chr1:99322320:G:A	G	A	0.33058	0.0376962
1	99403533	chr1:99403533:A:C	A	C	1.60005	0.0213787
1	99453557	chr1:99453557:T:C	T	C	1.05067	0.0043471
1	99504438	chr1:99504438:G:T	G	T	0.493578	0.0371684
1	99526554	chr1:99526554:G:A	G	A	0.590532	0.0351572
1	99864107	chr1:99864107:A:C	A	C	0.642142	0.0424948
1	100299858	chr1:100299858:G:A	G	A	-0.356776	0.0371847
1	100412222	chr1:100412222:T:C	T	C	-0.736933	0.0296728
1	100563131	chr1:100563131:T:G	T	G	-0.474095	0.02529
1	100643426	chr1:100643426:G:A	G	A	0.402933	0.0419612
1	100680497	chr1:100680497:C:T	C	T	0.612594	0.0238806
1	101113995	chr1:101113995:G:A	G	A	0.411149	0.0406306
1	101231762	chr1:101231762:A:G	A	G	1.0451	0.0391053
1	101363028	chr1:101363028:G:A	G	A	-1.83613	0.00355106
1	101391943	chr1:101391943:C:T	C	T	0.315758	0.0437522
1	101474734	chr1:101474734:C:T	C	T	-1.37013	0.0169416
1	101574298	chr1:101574298:G:A	G	A	-0.519068	0.0201249
1	101694854	chr1:101694854:G:A	G	A	-1.92555	0.00274785
1	101832679	chr1:101832679:G:A	G	A	0.379642	0.0177263
1	101950123	chr1:101950123:G:T	G	T	-2.03019	0.00815157
1	101954031	chr1:101954031:G:A	G	A	-0.790844	0.0475151
1	102026148	chr1:102026148:T:C	T	C	0.354202	0.0197324
1	102276878	chr1:102276878:G:A	G	A	-0.964432	0.0379332
1	102890921	chr1:102890921:C:T	C	T	-0.6544	0.0253349
1	103979276	chr1:103979276:G:A	G	A	-0.981092	0.0394769
1	104126532	chr1:104126532:G:A	G	A	-0.825945	0.00968388
1	104611476	chr1:104611476:C:T	C	T	0.400882	0.0118702
1	104871495	chr1:104871495:A:G	A	G	0.387274	0.0276047
1	105131498	chr1:105131498:A:G	A	G	-1.10439	0.0413971
1	106199659	chr1:106199659:T:C	T	C	0.473079	0.0474252
1	106388932	chr1:106388932:A:G	A	G	0.545649	0.0486059
1	106946777	chr1:106946777:A:G	A	G	-0.393587	0.0433949
1	106947880	chr1:106947880:C:T	C	T	0.36627	0.0297966
1	106971485	chr1:106971485:C:A	C	A	-0.332304	0.0462285
1	107475930	chr1:107475930:C:T	C	T	-0.308311	0.0484398
1	107498570	chr1:107498570:A:G	A	G	0.433737	0.040883
1	107524070	chr1:107524070:T:G	T	G	-0.567447	0.0383393
1	107528686	chr1:107528686:C:T	C	T	0.44937	0.0244829
1	107681037	chr1:107681037:G:T	G	T	0.334841	0.0284775
1	107684693	chr1:107684693:T:C	T	C	0.496237	0.0118368
1	107718497	chr1:107718497:C:A	C	A	-0.495509	0.0322043
1	107842499	chr1:107842499:C:T	C	T	1.13028	0.00798114
1	108125292	chr1:108125292:T:C	T	C	-0.990145	0.0128847
1	108139322	chr1:108139322:G:A	G	A	0.663869	0.0353324
1	108150112	chr1:108150112:A:G	A	G	-0.329431	0.0327474
1	108356744	chr1:108356744:C:T	C	T	-1.1267	0.0199524
1	108519172	chr1:108519172:T:C	T	C	-0.551845	0.00286957
1	108658010	chr1:108658010:T:C	T	C	0.436736	0.0225019
1	108724417	chr1:108724417:A:G	A	G	0.421871	0.00947025
1	108948689	chr1:108948689:C:T	C	T	-0.294346	0.0462661
1	109103436	chr1:109103436:T:C	T	C	0.90397	0.0252182
1	109221146	chr1:109221146:C:T	C	T	-0.759963	0.0201728
1	109240639	chr1:109240639:T:C	T	C	0.560732	0.0142833
1	109427531	chr1:109427531:T:G	T	G	0.486929	0.0153721
1	109731286	chr1:109731286:G:T	G	T	-0.695957	0.000838123
1	109806666	chr1:109806666:A:G	A	G	-1.7306	0.0267707
1	109809255	chr1:109809255:G:A	G	A	0.421439	0.038501
1	109825731	chr1:109825731:T:G	T	G	-0.468169	0.030152
1	109911527	chr1:109911527:G:A	G	A	-0.882284	0.0435393
1	110098575	chr1:110098575:T:C	T	C	0.336481	0.030612
1	110195674	chr1:110195674:G:A	G	A	-0.383959	0.0154835
1	110222770	chr1:110222770:A:G	A	G	-0.64902	0.00990062
1	110343916	chr1:110343916:A:G	A	G	0.319461	0.0324351
1	110455667	chr1:110455667:T:C	T	C	-0.755191	0.0108195
1	110464247	chr1:110464247:G:A	G	A	0.340244	0.0286077
1	110465442	chr1:110465442:G:A	G	A	1.13774	0.0294257
1	110489060	chr1:110489060:G:A	G	A	0.616166	0.00759047
1	110491214	chr1:110491214:A:G	A	G	0.471321	0.034626
1	110516802	chr1:110516802:C:A	C	A	0.41358	0.00771519
1	110519427	chr1:110519427:C:T	C	T	-0.417156	0.0361637
1	110575192	chr1:110575192:A:G	A	G	-0.3823	0.0281837
1	110585725	chr1:110585725:C:T	C	T	1.32122	0.0262443
1	110602333	chr1:110602333:C:T	C	T	0.511359	0.01439
1	110634615	chr1:110634615:G:A	G	A	0.475678	0.040497
1	110637921	chr1:110637921:A:G	A	G	-0.428716	0.00511995
1	110661625	chr1:110661625:T:C	T	C	0.49345	0.0402124
1	110879566	chr1:110879566:T:C	T	C	-0.348632	0.0382358
1	110974459	chr1:110974459:A:G	A	G	-0.307552	0.0451115
1	111044841	chr1:111044841:A:C	A	C	0.299828	0.0490258
1	111177732	chr1:111177732:A:G	A	G	-1.005	0.032991
1	111264218	chr1:111264218:G:A	G	A	-2.13239	0.0435923
1	111268256	chr1:111268256:G:A	G	A	-0.396065	0.0323485
1	111311601	chr1:111311601:C:T	C	T	-0.368643	0.0119182
1	111470865	chr1:111470865:G:A	G	A	0.966456	0.01944
1	111576443	chr1:111576443:G:A	G	A	-0.375717	0.0225965
1	111585620	chr1:111585620:T:C	T	C	0.826618	0.0203558
1	111588542	chr1:111588542:T:C	T	C	0.583978	0.0216134
1	111721918	chr1:111721918:G:A	G	A	0.501465	0.0296114
1	111912162	chr1:111912162:C:T	C	T	-0.606822	0.0225866
1	111949983	chr1:111949983:T:C	T	C	0.339712	0.0384065
1	111950423	chr1:111950423:G:A	G	A	-1.63537	0.0397835
1	112029190	chr1:112029190:A:G	A	G	-0.344777	0.0243012
1	112440456	chr1:112440456:A:G	A	G	-0.960795	0.0231614
1	112479532	chr1:112479532:C:T	C	T	-0.419085	0.0438069
1	112966469	chr1:112966469:C:A	C	A	0.32502	0.0363806
1	113122302	chr1:113122302:G:T	G	T	-0.749381	0.00749901
1	113222383	chr1:113222383:T:C	T	C	0.358924	0.0288639
1	113279662	chr1:113279662:T:C	T	C	-0.302289	0.0469234
1	113317336	chr1:113317336:A:G	A	G	-0.338259	0.0230497
1	113321226	chr1:113321226:C:T	C	T	-1.12787	0.0387616
1	113324843	chr1:113324843:C:T	C	T	0.577742	0.0042841
1	113576998	chr1:113576998:C:T	C	T	0.394494	0.0294351
1	113831813	chr1:113831813:C:T	C	T	-0.359491	0.0431132
1	114125142	chr1:114125142:T:G	T	G	-0.325238	0.03575
1	114133007	chr1:114133007:A:G	A	G	-0.373157	0.0149379
1	114277212	chr1:114277212:T:C	T	C	0.299469	0.0412449
1	114289343	chr1:114289343:G:T	G	T	-2.23642	0.0349846
1	114295353	chr1:114295353:G:A	G	A	-0.453021	0.00421686
1	114879689	chr1:114879689:T:G	T	G	-0.47495	0.00679885
1	114937253	chr1:114937253:C:T	C	T	-0.538176	0.021245
1	115112245	chr1:115112245:G:A	G	A	-0.318099	0.0475937
1	115428952	chr1:115428952:G:A	G	A	0.484527	0.00918266
1	115476516	chr1:115476516:C:T	C	T	-0.456213	0.0429904
1	115554422	chr1:115554422:G:A	G	A	1.05941	0.00415007
1	115661243	chr1:115661243:A:G	A	G	-0.652902	0.0045572
1	116025411	chr1:116025411:T:C	T	C	-0.668082	0.0287306
1	116132117	chr1:116132117:C:T	C	T	0.299596	0.047634
1	116167027	chr1:116167027:A:C	A	C	-0.391615	0.0123126
1	116185360	chr1:116185360:T:C	T	C	0.347403	0.0299277
1	116420045	chr1:116420045:T:C	T	C	-0.413326	0.013047
1	116490161	chr1:116490161:G:A	G	A	-0.323791	0.0360493
1	116573246	chr1:116573246:T:C	T	C	-0.485327	0.00255089
1	116635423	chr1:116635423:C:T	C	T	-0.436785	0.038926
1	116709904	chr1:116709904:G:T	G	T	0.47326	0.0308912
1	116726347	chr1:116726347:A:G	A	G	-0.400177	0.0394081
1	116755162	chr1:116755162:A:G	A	G	-0.483311	0.00286341
1	117009362	chr1:117009362:G:A	G	A	0.351491	0.0399451
1	117028457	chr1:117028457:G:T	G	T	-0.520294	0.00587558
1	117117986	chr1:117117986:C:T	C	T	-0.73367	0.00352123
1	117646897	chr1:117646897:C:T	C	T	0.508601	0.0201056
1	117658506	chr1:117658506:T:C	T	C	0.326747	0.0458957
1	118340849	chr1:118340849:G:T	G	T	1.24558	0.0418543
1	118440176	chr1:118440176:T:G	T	G	1.95255	0.0112224
1	118482400	chr1:118482400:C:T	C	T	0.599519	0.00925952
1	118488612	chr1:118488612:T:C	T	C	-0.984464	0.0212061
1	118841195	chr1:118841195:T:C	T	C	0.340747	0.0269076
1	118867422	chr1:118867422:A:G	A	G	0.60507	0.00905226
1	118893236	chr1:118893236:T:C	T	C	0.458718	0.0032498
1	118915592	chr1:118915592:C:T	C	T	0.644459	0.00627475
1	119501554	chr1:119501554:C:A	C	A	0.453701	0.00356727
1	119522597	chr1:119522597:G:A	G	A	-0.439714	0.0283268
1	119880603	chr1:119880603:T:C	T	C	1.80628	0.0250984
1	119914878	chr1:119914878:C:T	C	T	-1.94196	0.0135914
1	147027422	chr1:147027422:T:C	T	C	-0.427747	0.0245895
1	147547392	chr1:147547392:C:T	C	T	-0.402661	0.0126028
1	147578797	chr1:147578797:T:C	T	C	-0.408631	0.00923771
1	147582433	chr1:147582433:A:G	A	G	-0.727657	0.0189509
1	147631238	chr1:147631238:C:T	C	T	0.41398	0.0318293
1	147769620	chr1:147769620:A:C	A	C	0.397855	0.0131002
1	147804137	chr1:147804137:C:T	C	T	-0.473889	0.0433945
1	147807752	chr1:147807752:G:A	G	A	-0.803584	0.0404972
1	147811693	chr1:147811693:C:T	C	T	0.642797	0.00922497
1	147916436	chr1:147916436:G:A	G	A	1.66025	0.0452414
1	150988452	chr1:150988452:G:A	G	A	0.49855	0.029054
1	152258950	chr1:152258950:C:A	C	A	-0.493044	0.0119955
1	153111610	chr1:153111610:G:T	G	T	0.917106	0.0137877
1	153288235	chr1:153288235:G:A	G	A	0.354279	0.0153017
1	153546477	chr1:153546477:G:A	G	A	-1.05476	0.00638891
1	153581079	chr1:153581079:G:A	G	A	-0.882786	0.0442645
1	154286073	chr1:154286073:C:T	C	T	-0.661549	0.000387491
1	154422290	chr1:154422290:A:G	A	G	-0.436778	0.030621
1	154719612	chr1:154719612:T:C	T	C	0.31617	0.0411003
1	154797085	chr1:154797085:G:A	G	A	-0.540083	0.0301433
1	155071336	chr1:155071336:A:G	A	G	0.384681	0.0112117
1	156176427	chr1:156176427:C:T	C	T	0.382121	0.0201043
1	156254032	chr1:156254032:T:C	T	C	-0.419268	0.0204728
1	156271563	chr1:156271563:G:A	G	A	0.353715	0.0314587
1	156439459	chr1:156439459:A:G	A	G	0.511841	0.039769
1	156844686	chr1:156844686:G:A	G	A	0.415632	0.0452979
1	156858662	chr1:156858662:C:A	C	A	1.09323	0.0227003
1	157019000	chr1:157019000:T:C	T	C	-0.333575	0.0414168
1	157281859	chr1:157281859:C:T	C	T	0.361552	0.0182503
1	157390962	chr1:157390962:C:A	C	A	-1.72789	0.000707271
1	157412085	chr1:157412085:G:A	G	A	-0.71709	0.0284381
1	157878880	chr1:157878880:T:C	T	C	-0.406483	0.0270617
1	157985495	chr1:157985495:G:A	G	A	-0.572051	0.0161184
1	158072363	chr1:158072363:C:T	C	T	0.51749	0.0373189
1	158131931	chr1:158131931:C:T	C	T	-0.416031	0.0257231
1	158234741	chr1:158234741:G:A	G	A	1.40037	0.00730945
1	158533644	chr1:158533644:T:C	T	C	-0.65374	0.00276761
1	158806905	chr1:158806905:A:G	A	G	-0.675076	0.0235622
1	158974337	chr1:158974337:T:C	T	C	0.525039	0.0114171
1	158975918	chr1:158975918:A:G	A	G	0.777946	0.0161973
1	159031275	chr1:159031275:T:C	T	C	0.394654	0.0450002
1	159134554	chr1:159134554:G:A	G	A	0.755759	0.017149
1	159162859	chr1:159162859:A:C	A	C	-0.900691	7.75992e-05
1	159207049	chr1:159207049:T:C	T	C	0.549039	0.0288623
1	159234210	chr1:159234210:C:T	C	T	-0.779644	9.14594e-05
1	159298350	chr1:159298350:G:A	G	A	0.368505	0.0347425
1	159306363	chr1:159306363:C:T	C	T	0.371407	0.0152113
1	159491863	chr1:159491863:C:A	C	A	0.407291	0.0352434
1	159592976	chr1:159592976:A:G	A	G	-0.513808	0.0374195
1	159736440	chr1:159736440:A:G	A	G	0.331249	0.040711
1	159763158	chr1:159763158:C:T	C	T	-2.39344	0.0235546
1	159916632	chr1:159916632:A:G	A	G	0.66727	0.0236453
1	159980753	chr1:159980753:T:C	T	C	-0.383477	0.0474429
1	160116165	chr1:160116165:A:C	A	C	0.447269	0.00873139
1	160124553	chr1:160124553:T:C	T	C	-0.412784	0.0263587
1	160137798	chr1:160137798:G:A	G	A	0.510585	0.0199848
1	160153991	chr1:160153991:A:G	A	G	-0.57729	0.00353041
1	160377630	chr1:160377630:C:T	C	T	1.01171	0.0219504
1	160495121	chr1:160495121:C:A	C	A	-0.915896	0.0251316
1	160614570	chr1:160614570:A:C	A	C	-0.330647	0.0286353
1	160789729	chr1:160789729:T:C	T	C	0.534784	0.00105511
1	160830690	chr1:160830690:T:C	T	C	0.303049	0.0454656
1	160857209	chr1:160857209:T:C	T	C	1.0126	0.0137209
1	160960100	chr1:160960100:C:T	C	T	-0.410634	0.023752
1	161087638	chr1:161087638:G:A	G	A	0.668367	0.024273
1	161099046	chr1:161099046:A:C	A	C	-0.455747	0.00574186
1	161487847	chr1:161487847:C:A	C	A	-0.401891	0.0110705
1	161511740	chr1:161511740:G:A	G	A	1.23269	0.00701419
1	162016457	chr1:162016457:C:T	C	T	0.56881	0.0392767
1	162510355	chr1:162510355:A:G	A	G	0.404053	0.0125113
1	162653357	chr1:162653357:G:A	G	A	-1.23669	0.0234815
1	162757121	chr1:162757121:A:G	A	G	-0.712205	0.00963306
1	162919468	chr1:162919468:G:A	G	A	-0.365873	0.0237265
1	163006966	chr1:163006966:A:G	A	G	-0.544216	0.0226198
1	163208209	chr1:163208209:G:A	G	A	0.40846	0.00979061
1	163368974	chr1:163368974:G:A	G	A	-0.980846	0.0231697
1	163394646	chr1:163394646:C:T	C	T	-0.70071	0.011089
1	163467135	chr1:163467135:G:A	G	A	0.383633	0.0247398
1	163505103	chr1:163505103:C:T	C	T	0.353577	0.0349586
1	163552888	chr1:163552888:A:C	A	C	-0.758184	0.00731746
1	163553913	chr1:163553913:C:T	C	T	0.328208	0.032545
1	163565395	chr1:163565395:A:G	A	G	-0.817247	0.0353237
1	163772847	chr1:163772847:G:T	G	T	-0.715113	0.0215106
1	163813006	chr1:163813006:C:T	C	T	0.98004	0.00898605
1	163906857	chr1:163906857:G:A	G	A	2.64907	0.0133494
1	164127446	chr1:164127446:C:T	C	T	-0.408977	0.00584057
1	164143425	chr1:164143425:C:T	C	T	0.965894	0.00855165
1	164207470	chr1:164207470:A:G	A	G	-1.30937	0.0152777
1	164745301	chr1:164745301:G:A	G	A	-1.1268	0.000869295
1	164755402	chr1:164755402:G:A	G	A	1.24423	0.00803506
1	164763678	chr1:164763678:A:G	A	G	-1.33295	0.0103394
1	165011593	chr1:165011593:T:C	T	C	-1.24767	0.0290753
1	165026508	chr1:165026508:C:T	C	T	-0.918006	0.0409039
1	165135131	chr1:165135131:C:T	C	T	0.666116	0.0360727
1	165206137	chr1:165206137:G:A	G	A	0.359512	0.0262519
1	165248119	chr1:165248119:G:A	G	A	0.343313	0.0260351
1	165286356	chr1:165286356:C:T	C	T	0.388586	0.0133135
1	165315244	chr1:165315244:C:T	C	T	0.742286	0.04832
1	165315486	chr1:165315486:G:A	G	A	0.703527	0.0191203
1	165471847	chr1:165471847:T:C	T	C	0.461938	0.00365688
1	165614526	chr1:165614526:C:A	C	A	0.631559	0.0456954
1	165625580	chr1:165625580:G:A	G	A	0.741152	0.0159058
1	165724302	chr1:165724302:T:C	T	C	-0.426062	0.0122655
1	165782601	chr1:165782601:T:G	T	G	-0.313349	0.0442222
1	166041873	chr1:166041873:C:T	C	T	-0.421625	0.00850348
1	166058634	chr1:166058634:T:C	T	C	0.481876	0.0267536
1	166263621	chr1:166263621:T:C	T	C	-1.68503	0.0395408
1	166394021	chr1:166394021:A:G	A	G	0.382258	0.0284389
1	166652371	chr1:166652371:C:T	C	T	0.473242	0.0146603
1	166740694	chr1:166740694:C:T	C	T	-0.520217	0.00315507
1	166827489	chr1:166827489:A:G	A	G	0.550875	0.000370959
1	166992620	chr1:166992620:G:A	G	A	0.418733	0.010802
1	167436990	chr1:167436990:G:A	G	A	-0.459876	0.00312811
1	167457187	chr1:167457187:G:A	G	A	0.340086	0.0294586
1	167483522	chr1:167483522:A:G	A	G	-0.520324	0.0146854
1	167640981	chr1:167640981:C:T	C	T	0.656494	0.0448678
1	167670996	chr1:167670996:C:T	C	T	-0.634813	0.0170052
1	167674444	chr1:167674444:C:T	C	T	-1.06172	0.0314645
1	168335311	chr1:168335311:C:A	C	A	-0.556136	0.00401166
1	168336511	chr1:168336511:C:T	C	T	-0.606408	0.000157028
1	168389792	chr1:168389792:G:A	G	A	0.345527	0.024125
1	168464322	chr1:168464322:G:A	G	A	-0.760708	0.0350644
1	168470054	chr1:168470054:T:C	T	C	0.358148	0.0203229
1	168616455	chr1:168616455:G:A	G	A	0.414682	0.00978071
1	168647500	chr1:168647500:G:A	G	A	0.399489	0.038121
1	168676480	chr1:168676480:C:T	C	T	0.558427	0.00393954
1	168704462	chr1:168704462:G:T	G	T	1.39821	0.00333334
1	168725789	chr1:168725789:A:G	A	G	0.455197	0.00530265
1	168759177	chr1:168759177:C:T	C	T	0.682233	0.0444172
1	168781160	chr1:168781160:G:A	G	A	-0.568412	0.0457691
1	168949528	chr1:168949528:G:T	G	T	0.414776	0.00892054
1	169022001	chr1:169022001:G:A	G	A	0.467273	0.0214122
1	169084388	chr1:169084388:A:G	A	G	0.590149	0.0177969
1	169093151	chr1:169093151:G:A	G	A	-1.0108	0.0100656
1	169109621	chr1:169109621:G:A	G	A	-0.352931	0.0321239
1	169122885	chr1:169122885:C:T	C	T	-0.391092	0.00951274
1	169301506	chr1:169301506:A:G	A	G	0.646313	0.0248158
1	169495040	chr1:169495040:G:A	G	A	-0.547211	0.0280008
1	169646529	chr1:169646529:C:A	C	A	-0.394853	0.028598
1	169654657	chr1:169654657:G:T	G	T	0.602094	0.00345329
1	170146901	chr1:170146901:C:T	C	T	-0.475235	0.00290389
1	170530565	chr1:170530565:A:G	A	G	0.542123	0.00634535
1	170793539	chr1:170793539:G:A	G	A	0.598737	0.000409342
1	170850211	chr1:170850211:G:A	G	A	-1.21877	0.0316784
1	170926657	chr1:170926657:G:A	G	A	0.595544	0.004559
1	170954125	chr1:170954125:G:T	G	T	-0.645085	0.0325843
1	170966662	chr1:170966662:A:C	A	C	0.920049	0.0281672
1	170980510	chr1:170980510:A:G	A	G	-0.434023	0.00552602
1	171388111	chr1:171388111:C:T	C	T	-0.586492	0.0439833
1	171395002	chr1:171395002:C:T	C	T	-0.406661	0.00908882
1	171409147	chr1:171409147:A:G	A	G	-0.339939	0.0324714
1	171416934	chr1:171416934:T:C	T	C	0.70128	0.011348
1	171752006	chr1:171752006:C:T	C	T	-0.361078	0.0206703
1	171856716	chr1:171856716:C:T	C	T	1.67042	0.0159322
1	172158021	chr1:172158021:A:C	A	C	-0.497487	0.0090551
1	172386701	chr1:172386701:C:T	C	T	0.520547	0.0133595
1	172503680	chr1:172503680:T:C	T	C	0.672315	0.000573202
1	173164847	chr1:173164847:A:G	A	G	-0.33092	0.0345676
1	173331701	chr1:173331701:A:G	A	G	0.397312	0.0112876
1	173399827	chr1:173399827:A:C	A	C	-0.351715	0.0324113
1	173461310	chr1:173461310:A:G	A	G	0.966956	0.00469139
1	173853083	chr1:173853083:A:G	A	G	-0.550458	0.00090493
1	173871661	chr1:173871661:C:T	C	T	0.592867	0.0230699
1	173901226	chr1:173901226:G:A	G	A	-0.422269	0.0480518
1	174172092	chr1:174172092:T:G	T	G	0.465731	0.0290285
1	174383795	chr1:174383795:C:T	C	T	-0.624014	0.0198722
1	174541254	chr1:174541254:C:T	C	T	0.489846	0.0207721
1	174845146	chr1:174845146:A:G	A	G	-0.61507	0.0224848
1	174856360	chr1:174856360:A:G	A	G	0.47591	0.0212271
1	174975366	chr1:174975366:G:A	G	A	0.627023	0.0148153
1	175018880	chr1:175018880:C:T	C	T	-0.339001	0.0313112
1	175057303	chr1:175057303:T:C	T	C	0.353949	0.018525
1	175138365	chr1:175138365:A:G	A	G	-0.339989	0.0419421
1	175304203	chr1:175304203:C:T	C	T	0.454344	0.0248859
1	175354310	chr1:175354310:A:G	A	G	-0.377824	0.0225766
1	175374498	chr1:175374498:A:G	A	G	-0.518494	0.00053285
1	175429162	chr1:175429162:G:A	G	A	0.596642	0.03791
1	175527214	chr1:175527214:A:G	A	G	-0.339298	0.0357522
1	175590884	chr1:175590884:A:G	A	G	0.61398	0.0106827
1	175607692	chr1:175607692:A:G	A	G	0.507624	0.000782518
1	175678382	chr1:175678382:G:A	G	A	0.740494	0.014786
1	175723168	chr1:175723168:G:T	G	T	-0.382511	0.0100318
1	175868717	chr1:175868717:A:G	A	G	-1.58028	0.0497047
1	175905259	chr1:175905259:A:G	A	G	-0.3647	0.0411136
1	175949959	chr1:175949959:C:T	C	T	-0.371015	0.0442085
1	176202664	chr1:176202664:T:C	T	C	-0.439692	0.0193794
1	176420580	chr1:176420580:G:A	G	A	1.60864	0.0168354
1	176543259	chr1:176543259:T:C	T	C	-0.608871	0.006897
1	176860132	chr1:176860132:A:C	A	C	-0.492809	0.0136954
1	177047693	chr1:177047693:T:G	T	G	0.777898	0.0366831
1	177197417	chr1:177197417:G:A	G	A	-0.806739	0.0117801
1	177214364	chr1:177214364:C:T	C	T	0.604873	0.0310105
1	177374145	chr1:177374145:G:A	G	A	0.677825	0.0270684
1	177660865	chr1:177660865:C:T	C	T	-0.876003	0.0139058
1	177719124	chr1:177719124:G:A	G	A	0.707302	0.00259396
1	177729380	chr1:177729380:T:G	T	G	-0.319813	0.0392565
1	177781973	chr1:177781973:A:G	A	G	0.356498	0.0231468
1	177872760	chr1:177872760:G:A	G	A	0.472664	0.00648067
1	177876522	chr1:177876522:A:G	A	G	0.421978	0.0332616
1	177932578	chr1:177932578:T:C	T	C	-0.342551	0.0325357
1	177949139	chr1:177949139:C:T	C	T	-2.59674	0.0167813
1	177983669	chr1:177983669:C:T	C	T	-0.632051	0.0103885
1	178015019	chr1:178015019:A:G	A	G	-0.553723	0.00679613
1	178114067	chr1:178114067:T:G	T	G	0.778964	0.0227054
1	178527106	chr1:178527106:C:T	C	T	-0.311896	0.0479603
1	178566664	chr1:178566664:C:T	C	T	1.14037	0.000335322
1	178642798	chr1:178642798:G:A	G	A	0.433834	0.0375217
1	178700536	chr1:178700536:A:G	A	G	0.543776	0.00926698
1	178711323	chr1:178711323:A:G	A	G	-0.346284	0.035518
1	178950747	chr1:178950747:A:C	A	C	-0.513487	0.00313636
1	178964601	chr1:178964601:C:T	C	T	0.746917	0.0430578
1	178983333	chr1:178983333:A:C	A	C	-1.39121	0.0342183
1	179050051	chr1:179050051:A:G	A	G	0.505619	0.00253699
1	179299944	chr1:179299944:G:A	G	A	-0.484596	0.00467594
1	179303171	chr1:179303171:A:G	A	G	-0.896803	0.0303156
1	179342467	chr1:179342467:T:G	T	G	0.516045	0.00260673
1	179586230	chr1:179586230:C:T	C	T	-0.454776	0.0164611
1	179607295	chr1:179607295:A:G	A	G	0.400796	0.0288162
1	179818470	chr1:179818470:A:G	A	G	0.492656	0.00279473
1	179837409	chr1:179837409:A:G	A	G	0.676837	0.0173192
1	179999154	chr1:179999154:G:A	G	A	-0.483578	0.00746862
1	180194999	chr1:180194999:G:T	G	T	0.610913	0.0105863
1	180267978	chr1:180267978:C:T	C	T	0.670549	0.0245097
1	180270338	chr1:180270338:C:T	C	T	-0.713589	0.0168365
1	180590607	chr1:180590607:G:A	G	A	-1.39696	0.000970325
1	180969783	chr1:180969783:G:A	G	A	0.396625	0.0194232
1	180974393	chr1:180974393:C:T	C	T	-0.418751	0.00807632
1	181074152	chr1:181074152:C:T	C	T	0.582192	0.0451719
1	181120573	chr1:181120573:T:C	T	C	1.03833	0.0162011
1	181157367	chr1:181157367:A:G	A	G	0.505872	0.00746136
1	181341257	chr1:181341257:C:T	C	T	-0.395742	0.0219315
1	181349159	chr1:181349159:G:A	G	A	0.644173	0.0077732
1	181476676	chr1:181476676:C:T	C	T	0.717139	0.0404022
1	181758137	chr1:181758137:G:A	G	A	-0.458908	0.00335123
1	181802698	chr1:181802698:A:C	A	C	-0.40541	0.0131425
1	182256424	chr1:182256424:T:C	T	C	0.37271	0.0201374
1	182360258	chr1:182360258:A:G	A	G	0.516557	0.0100114
1	182367907	chr1:182367907:C:A	C	A	0.454691	0.00618815
1	182429883	chr1:182429883:G:T	G	T	0.465542	0.00445631
1	183149303	chr1:183149303:A:G	A	G	-0.610113	0.020581
1	183296246	chr1:183296246:A:G	A	G	0.413358	0.00854369
1	183426931	chr1:183426931:G:A	G	A	0.672248	0.0227936
1	183534529	chr1:183534529:A:G	A	G	-0.698684	0.0312224
1	183592382	chr1:183592382:T:C	T	C	0.355581	0.0231969
1	183825394	chr1:183825394:G:A	G	A	0.36159	0.0445269
1	183832874	chr1:183832874:A:G	A	G	0.409004	0.0071739
1	183976254	chr1:183976254:G:A	G	A	0.316888	0.0449234
1	184028295	chr1:184028295:C:T	C	T	-0.483589	0.0313526
1	184036994	chr1:184036994:A:G	A	G	0.41192	0.0119524
1	184130317	chr1:184130317:G:A	G	A	2.19666	0.0401166
1	184337472	chr1:184337472:G:A	G	A	-0.809005	0.0115762
1	184363857	chr1:184363857:G:A	G	A	0.582074	0.000366323
1	184439344	chr1:184439344:A:C	A	C	1.07029	0.0384767
1	184502831	chr1:184502831:A:G	A	G	-0.613179	0.000124409
1	184586504	chr1:184586504:G:T	G	T	-0.470803	0.0297244
1	184635794	chr1:184635794:G:A	G	A	-0.88739	0.0336766
1	184906570	chr1:184906570:C:T	C	T	-0.698969	0.0236734
1	185057681	chr1:185057681:A:G	A	G	-0.319697	0.0378028
1	185461413	chr1:185461413:A:C	A	C	0.353703	0.033873
1	185526711	chr1:185526711:C:T	C	T	-0.550088	0.0299522
1	185727433	chr1:185727433:G:A	G	A	0.319051	0.0474206
1	185844747	chr1:185844747:A:C	A	C	-0.514888	0.0325071
1	186158378	chr1:186158378:G:T	G	T	0.414822	0.0118749
1	186827959	chr1:186827959:T:C	T	C	-0.438078	0.0288242
1	186849811	chr1:186849811:G:T	G	T	-0.723712	0.0116475
1	186894824	chr1:186894824:T:G	T	G	0.427477	0.0227706
1	186985153	chr1:186985153:T:C	T	C	-0.366363	0.0173292
1	187308367	chr1:187308367:A:G	A	G	-0.6612	0.0111482
1	187321263	chr1:187321263:T:C	T	C	0.430198	0.0324753
1	187385858	chr1:187385858:T:C	T	C	1.23644	0.00670094
1	187830147	chr1:187830147:C:T	C	T	-0.508303	0.0222239
1	187858475	chr1:187858475:T:C	T	C	0.869593	0.0145575
1	188182284	chr1:188182284:C:T	C	T	-0.482953	0.0368877
1	188494678	chr1:188494678:A:G	A	G	0.528683	0.0243645
1	188646098	chr1:188646098:A:G	A	G	0.50594	0.0187398
1	188674430	chr1:188674430:T:C	T	C	-0.447004	0.00669851
1	188897401	chr1:188897401:C:T	C	T	2.20531	0.0385419
1	189795201	chr1:189795201:A:G	A	G	-1.26417	0.0176164
1	189802066	chr1:189802066:A:G	A	G	0.727425	0.000867056
1	190102268	chr1:190102268:G:T	G	T	0.4689	0.00352783
1	190114254	chr1:190114254:G:A	G	A	-1.04983	0.00508747
1	190337604	chr1:190337604:A:G	A	G	-0.313579	0.0445578
1	190461279	chr1:190461279:C:T	C	T	-0.658863	0.0123042
1	190573083	chr1:190573083:T:C	T	C	-2.5051	0.0198622
1	190857300	chr1:190857300:C:T	C	T	-0.669367	0.0282584
1	190984341	chr1:190984341:G:A	G	A	0.369501	0.0497078
1	191168884	chr1:191168884:T:G	T	G	-0.595668	0.00967731
1	191664863	chr1:191664863:C:A	C	A	-0.3196	0.0404989
1	191891426	chr1:191891426:C:T	C	T	-0.700217	0.0443287
1	192141301	chr1:192141301:A:C	A	C	0.462182	0.00379423
1	192434592	chr1:192434592:G:A	G	A	-0.657086	0.0155291
1	192629385	chr1:192629385:T:G	T	G	-0.739333	0.0126431
1	193484531	chr1:193484531:A:G	A	G	-0.384224	0.010233
1	193497227	chr1:193497227:A:G	A	G	0.759345	0.00973183
1	193539883	chr1:193539883:G:A	G	A	2.19292	0.0410916
1	193736992	chr1:193736992:G:A	G	A	-0.924383	0.00100756
1	193776984	chr1:193776984:G:T	G	T	-0.966376	0.0498536
1	194395990	chr1:194395990:T:C	T	C	-0.478365	0.0362729
1	194575689	chr1:194575689:C:T	C	T	-1.59611	0.0437979
1	195075607	chr1:195075607:G:T	G	T	-0.791425	0.0146203
1	195327997	chr1:195327997:T:C	T	C	0.364194	0.0213063
1	195468906	chr1:195468906:T:C	T	C	0.398138	0.0180412
1	195597093	chr1:195597093:T:G	T	G	0.355323	0.0356596
1	195784340	chr1:195784340:C:A	C	A	0.584761	0.027797
1	195921922	chr1:195921922:G:A	G	A	0.55879	0.00937576
1	195966192	chr1:195966192:G:A	G	A	0.514135	0.0163848
1	195992952	chr1:195992952:C:T	C	T	-0.40104	0.0162092
1	196005106	chr1:196005106:T:G	T	G	1.01701	0.0311262
1	196394414	chr1:196394414:G:A	G	A	0.409968	0.0168381
1	196665380	chr1:196665380:A:G	A	G	0.373136	0.0419916
1	197311165	chr1:197311165:A:C	A	C	0.330764	0.0343869
1	197338951	chr1:197338951:G:T	G	T	0.836423	0.021945
1	197724136	chr1:197724136:C:T	C	T	0.691908	0.0387224
1	198051000	chr1:198051000:G:A	G	A	-0.401774	0.0239947
1	198203845	chr1:198203845:G:T	G	T	-0.625288	0.0213892
1	198483797	chr1:198483797:G:A	G	A	1.76201	0.0289056
1	198591625	chr1:198591625:C:T	C	T	1.69654	0.0107719
1	198601968	chr1:198601968:G:A	G	A	-0.521668	0.00584895
1	198665496	chr1:198665496:T:C	T	C	0.39229	0.0102617
1	198752063	chr1:198752063:T:C	T	C	-0.770753	0.00255261
1	198843596	chr1:198843596:T:G	T	G	0.538045	0.00613033
1	199606808	chr1:199606808:C:T	C	T	-0.345524	0.0276722
1	199643387	chr1:199643387:A:G	A	G	0.645719	0.0152347
1	199731727	chr1:199731727:G:A	G	A	-0.385604	0.0275612
1	199747134	chr1:199747134:T:C	T	C	0.514057	0.0288905
1	199903582	chr1:199903582:C:T	C	T	-0.769243	0.023938
1	199913034	chr1:199913034:C:T	C	T	0.556566	0.00022866
1	200004835	chr1:200004835:A:G	A	G	1.08535	0.00065792
1	200138482	chr1:200138482:C:A	C	A	0.336196	0.028653
1	200139418	chr1:200139418:T:C	T	C	1.26097	0.0171219
1	200223710	chr1:200223710:G:T	G	T	2.38174	0.0250227
1	200481238	chr1:200481238:A:G	A	G	-0.781227	0.0387971
1	200500377	chr1:200500377:T:C	T	C	-0.54664	0.0190962
1	200598678	chr1:200598678:C:T	C	T	1.4537	0.0359703
1	200680741	chr1:200680741:G:A	G	A	-0.330644	0.0275366
1	200898424	chr1:200898424:C:T	C	T	0.970081	0.0304461
1	201092649	chr1:201092649:G:A	G	A	-0.462956	0.0166812
1	201225453	chr1:201225453:C:T	C	T	0.506274	0.00780082
1	201395070	chr1:201395070:A:G	A	G	-2.11731	0.045704
1	201402354	chr1:201402354:G:A	G	A	0.399033	0.0103109
1	201434682	chr1:201434682:C:A	C	A	0.542452	0.0362929
1	201534665	chr1:201534665:C:T	C	T	0.350959	0.0370326
1	201574673	chr1:201574673:G:A	G	A	0.829617	0.0324749
1	201624439	chr1:201624439:G:A	G	A	0.875308	0.0131164
1	201638144	chr1:201638144:C:T	C	T	0.427287	0.0283309
1	201752802	chr1:201752802:T:G	T	G	-0.464567	0.0207549
1	201794056	chr1:201794056:T:C	T	C	0.519307	0.0012925
1	201884037	chr1:201884037:G:T	G	T	-0.344474	0.0280039
1	201950559	chr1:201950559:G:A	G	A	-0.362569	0.0155003
1	201995261	chr1:201995261:G:A	G	A	-0.719077	0.0418677
1	202087680	chr1:202087680:G:A	G	A	0.320567	0.0398567
1	202092986	chr1:202092986:T:G	T	G	-0.684007	0.00164933
1	202108001	chr1:202108001:G:A	G	A	-1.79997	0.0223551
1	202130973	chr1:202130973:A:G	A	G	-1.1238	0.0282711
1	202202211	chr1:202202211:G:A	G	A	0.383786	0.0192137
1	202233110	chr1:202233110:C:T	C	T	-0.992438	0.0164177
1	202250043	chr1:202250043:C:T	C	T	-0.339715	0.0450964
1	202811535	chr1:202811535:T:C	T	C	-0.375304	0.012837
1	202843983	chr1:202843983:G:A	G	A	-1.7115	0.0317553
1	202945228	chr1:202945228:T:C	T	C	0.331247	0.029956
1	202947678	chr1:202947678:C:T	C	T	0.563263	0.00143912
1	202956128	chr1:202956128:G:A	G	A	-1.47454	0.0346235
1	203000186	chr1:203000186:T:C	T	C	0.504544	0.0142122
1	203099592	chr1:203099592:T:C	T	C	-0.366403	0.0360342
1	203133504	chr1:203133504:G:A	G	A	0.406761	0.0381246
1	203163179	chr1:203163179:C:T	C	T	-0.357326	0.0446136
1	203342608	chr1:203342608:T:C	T	C	0.327635	0.043858
1	203518288	chr1:203518288:A:G	A	G	0.495743	0.00408235
1	203521961	chr1:203521961:A:G	A	G	1.04964	0.0225245
1	203582049	chr1:203582049:A:C	A	C	0.362459	0.0250189
1	203667166	chr1:203667166:G:A	G	A	-0.506011	0.0339957
1	203918528	chr1:203918528:C:T	C	T	-0.803746	0.0276057
1	203919977	chr1:203919977:G:A	G	A	0.574734	0.000509293
1	203984763	chr1:203984763:G:A	G	A	0.41427	0.0423765
1	203996676	chr1:203996676:G:A	G	A	-0.449493	0.00460391
1	204077651	chr1:204077651:C:T	C	T	0.642245	0.00824681
1	204186888	chr1:204186888:C:A	C	A	0.661152	0.00580938
1	204201888	chr1:204201888:C:A	C	A	1.35422	0.0230891
1	204276219	chr1:204276219:T:C	T	C	-0.318919	0.0368191
1	204379782	chr1:204379782:A:G	A	G	-1.05357	0.0148121
1	204419816	chr1:204419816:G:A	G	A	0.455546	0.0436614
1	204429628	chr1:204429628:T:C	T	C	-0.733396	0.0138316
1	204514519	chr1:204514519:T:G	T	G	1.22406	0.0357339
1	204523159	chr1:204523159:G:A	G	A	0.507883	0.0219266
1	204712883	chr1:204712883:C:T	C	T	0.386477	0.0396513
1	204878366	chr1:204878366:G:A	G	A	-1.15675	0.000487468
1	205000561	chr1:205000561:G:A	G	A	0.405707	0.0159605
1	205042531	chr1:205042531:T:C	T	C	-0.479795	0.0205668
1	205342502	chr1:205342502:G:A	G	A	0.37188	0.0160839
1	205361115	chr1:205361115:A:C	A	C	-0.599172	0.000413087
1	205382656	chr1:205382656:G:A	G	A	-1.37175	0.0397275
1	205410943	chr1:205410943:G:A	G	A	0.455071	0.00556527
1	205435419	chr1:205435419:A:G	A	G	0.425591	0.0147636
1	205438887	chr1:205438887:C:T	C	T	-1.39683	0.00506537
1	205446144	chr1:205446144:G:A	G	A	-1.61156	0.000697027
1	205509501	chr1:205509501:T:G	T	G	1.20879	0.0276484
1	205518710	chr1:205518710:C:T	C	T	-0.350069	0.0192266
1	205536349	chr1:205536349:G:A	G	A	0.465816	0.00425708
1	205547799	chr1:205547799:C:T	C	T	-0.322749	0.0386376
1	205607789	chr1:205607789:A:G	A	G	-0.521198	0.00146553
1	205665187	chr1:205665187:G:A	G	A	0.61582	0.037178
1	205668838	chr1:205668838:C:T	C	T	0.662845	0.0127324
1	205775090	chr1:205775090:C:T	C	T	-0.61471	0.00728535
1	205786884	chr1:205786884:G:A	G	A	-0.828797	0.0213335
1	205825014	chr1:205825014:G:A	G	A	-0.306429	0.0467484
1	206314259	chr1:206314259:T:C	T	C	0.822058	0.0099369
1	206738221	chr1:206738221:A:G	A	G	0.332699	0.0446697
1	206860433	chr1:206860433:G:A	G	A	-2.1794	0.0428652
1	206869339	chr1:206869339:T:C	T	C	1.07381	0.0134657
1	206922735	chr1:206922735:C:T	C	T	0.585611	0.0224826
1	207089635	chr1:207089635:T:G	T	G	0.323211	0.0433875
1	207118137	chr1:207118137:G:A	G	A	0.383637	0.0162714
1	207491262	chr1:207491262:C:T	C	T	0.57069	0.00377298
1	207695249	chr1:207695249:C:T	C	T	0.541035	0.0374065
1	207889126	chr1:207889126:A:C	A	C	-0.363828	0.0321733
1	208093517	chr1:208093517:C:T	C	T	-0.399718	0.0222143
1	208098037	chr1:208098037:C:A	C	A	-0.596016	0.0222439
1	208369004	chr1:208369004:T:C	T	C	-0.502265	0.0173849
1	208410185	chr1:208410185:A:C	A	C	0.31667	0.0449767
1	208446222	chr1:208446222:A:G	A	G	-0.695876	0.0044646
1	208484938	chr1:208484938:T:C	T	C	0.565848	0.0239079
1	208537248	chr1:208537248:A:G	A	G	0.434939	0.00695692
1	208604404	chr1:208604404:G:A	G	A	0.738858	0.0175991
1	208673752	chr1:208673752:C:T	C	T	-0.636501	0.0146464
1	208708349	chr1:208708349:G:A	G	A	-0.741861	0.0470336
1	208754859	chr1:208754859:A:G	A	G	0.718212	0.00712065
1	209018794	chr1:209018794:C:T	C	T	0.406945	0.0480739
1	209094905	chr1:209094905:T:G	T	G	0.497922	0.0366955
1	209136751	chr1:209136751:G:A	G	A	-0.490605	0.00183976
1	209138733	chr1:209138733:T:C	T	C	0.606596	0.0133823
1	209369946	chr1:209369946:G:T	G	T	-0.610081	0.0405005
1	209423229	chr1:209423229:A:G	A	G	-1.49934	0.0315918
1	209458859	chr1:209458859:C:T	C	T	0.29604	0.0439005
1	209541153	chr1:209541153:A:G	A	G	0.56548	0.00424157
1	209631154	chr1:209631154:T:G	T	G	0.763591	0.000473494
1	209633713	chr1:209633713:A:C	A	C	0.459801	0.0420477
1	209643869	chr1:209643869:T:C	T	C	0.306142	0.0473144
1	210292318	chr1:210292318:C:T	C	T	2.34817	0.0267323
1	210322657	chr1:210322657:G:A	G	A	0.377265	0.0234008
1	210338982	chr1:210338982:T:C	T	C	-0.445569	0.00832214
1	210399607	chr1:210399607:C:A	C	A	-0.476138	0.00149225
1	210404797	chr1:210404797:A:G	A	G	1.3606	0.0104322
1	210468094	chr1:210468094:A:G	A	G	0.453242	0.0253072
1	210490067	chr1:210490067:G:T	G	T	-0.331561	0.0285651
1	210500167	chr1:210500167:G:A	G	A	-0.370305	0.0182275
1	210553859	chr1:210553859:T:C	T	C	-0.674144	0.0334908
1	211530286	chr1:211530286:G:A	G	A	0.40094	0.0423529
1	211683153	chr1:211683153:T:C	T	C	-0.507222	0.00446499
1	211696267	chr1:211696267:G:A	G	A	-0.482169	0.0413219
1	211703294	chr1:211703294:T:C	T	C	-0.744088	0.0442062
1	211916729	chr1:211916729:G:A	G	A	-0.527083	0.0340945
1	212227761	chr1:212227761:C:A	C	A	0.472161	0.0299356
1	212390200	chr1:212390200:G:A	G	A	-0.652992	0.0142561
1	212472584	chr1:212472584:T:C	T	C	0.607048	0.0181167
1	212559344	chr1:212559344:T:C	T	C	0.499183	0.00807117
1	212592167	chr1:212592167:C:T	C	T	-0.381254	0.0288112
1	212665374	chr1:212665374:T:C	T	C	0.379848	0.0110881
1	212893572	chr1:212893572:A:G	A	G	-0.391811	0.0266828
1	213416016	chr1:213416016:T:G	T	G	-0.380294	0.01273
1	213598147	chr1:213598147:G:A	G	A	0.83862	0.0196781
1	213603336	chr1:213603336:A:G	A	G	-0.367944	0.0153202
1	213634289	chr1:213634289:C:T	C	T	0.314174	0.0403513
1	213759078	chr1:213759078:C:T	C	T	-0.367443	0.0195399
1	213764545	chr1:213764545:T:C	T	C	1.02652	0.029205
1	213779649	chr1:213779649:T:C	T	C	0.359351	0.0347176
1	213797422	chr1:213797422:G:A	G	A	0.609451	0.0229361
1	214221560	chr1:214221560:A:G	A	G	-0.426497	0.04065
1	214229716	chr1:214229716:T:C	T	C	-0.620286	0.00589816
1	214275757	chr1:214275757:A:G	A	G	0.872571	0.000502935
1	214284382	chr1:214284382:T:G	T	G	0.404488	0.0161792
1	214341018	chr1:214341018:A:C	A	C	0.34257	0.0395556
1	214392139	chr1:214392139:T:C	T	C	1.74691	0.000885548
1	214428222	chr1:214428222:C:T	C	T	0.64259	0.0223283
1	214695072	chr1:214695072:C:T	C	T	-0.400751	0.0157062
1	214845317	chr1:214845317:T:C	T	C	-0.546197	0.0406429
1	215084607	chr1:215084607:T:C	T	C	0.492639	0.0051094
1	215204614	chr1:215204614:C:A	C	A	0.369047	0.0132263
1	215479516	chr1:215479516:G:A	G	A	0.603032	0.0346884
1	215688127	chr1:215688127:A:C	A	C	0.430098	0.0392383
1	215717171	chr1:215717171:T:G	T	G	0.655067	0.000397692
1	215742122	chr1:215742122:C:T	C	T	-0.451909	0.00862111
1	215754979	chr1:215754979:C:T	C	T	-0.415865	0.00757299
1	215760483	chr1:215760483:C:A	C	A	0.550518	0.00221243
1	215799384	chr1:215799384:A:G	A	G	0.796532	0.00756218
1	215810060	chr1:215810060:T:C	T	C	0.757114	0.0125114
1	215881578	chr1:215881578:C:A	C	A	-0.340283	0.0372991
1	215885949	chr1:215885949:T:C	T	C	0.480066	0.0354028
1	215903260	chr1:215903260:G:A	G	A	-0.371208	0.0427802
1	216166008	chr1:216166008:T:C	T	C	0.44248	0.0165872
1	216480612	chr1:216480612:G:A	G	A	-0.712948	0.0431635
1	216494004	chr1:216494004:C:A	C	A	-0.330699	0.0322161
1	216519921	chr1:216519921:T:C	T	C	-0.43068	0.00757607
1	216527757	chr1:216527757:C:A	C	A	0.633043	0.000363672
1	216551976	chr1:216551976:T:C	T	C	0.345577	0.0225756
1	216629599	chr1:216629599:G:A	G	A	0.451657	0.0222495
1	216641220	chr1:216641220:C:T	C	T	-0.541755	0.000872829
1	216656511	chr1:216656511:T:C	T	C	0.605298	0.00676006
1	216668054	chr1:216668054:A:G	A	G	-0.657163	0.00010385
1	216755748	chr1:216755748:G:A	G	A	0.35082	0.0294486
1	216763146	chr1:216763146:T:G	T	G	-0.448278	0.0247746
1	216992581	chr1:216992581:C:T	C	T	0.500347	0.0419279
1	217082438	chr1:217082438:G:A	G	A	-0.514002	0.000742753
1	217082573	chr1:217082573:G:T	G	T	-0.665639	0.00912501
1	217129041	chr1:217129041:G:A	G	A	-0.356059	0.0214057
1	217159930	chr1:217159930:A:G	A	G	-0.664854	0.00229634
1	217180635	chr1:217180635:G:A	G	A	0.533417	0.0317044
1	217181977	chr1:217181977:T:C	T	C	0.371374	0.019892
1	217192245	chr1:217192245:T:G	T	G	-0.345419	0.0295184
1	217320757	chr1:217320757:G:A	G	A	0.310687	0.0432792
1	217983341	chr1:217983341:T:C	T	C	0.808605	0.0105086
1	218070677	chr1:218070677:C:T	C	T	-0.435507	0.0122224
1	218140584	chr1:218140584:G:A	G	A	0.324733	0.043521
1	218142796	chr1:218142796:C:T	C	T	0.334877	0.0289247
1	218156633	chr1:218156633:T:C	T	C	-0.905559	0.00554122
1	218242848	chr1:218242848:C:T	C	T	-0.373259	0.0118901
1	218248863	chr1:218248863:A:G	A	G	0.767265	0.0374044
1	218368650	chr1:218368650:T:C	T	C	-0.440357	0.00730853
1	218380187	chr1:218380187:C:T	C	T	0.341764	0.0353465
1	218385103	chr1:218385103:A:G	A	G	-0.587649	0.0454135
1	218461691	chr1:218461691:T:C	T	C	-0.55194	0.00637718
1	218530837	chr1:218530837:A:C	A	C	0.371841	0.0243447
1	218555224	chr1:218555224:C:T	C	T	-0.47191	0.016893
1	218564761	chr1:218564761:C:T	C	T	0.569835	0.000317567
1	218925134	chr1:218925134:G:A	G	A	-1.0819	0.00547757
1	218952851	chr1:218952851:T:G	T	G	0.540092	0.00894
1	219417128	chr1:219417128:T:C	T	C	-0.293696	0.0499074
1	219433635	chr1:219433635:A:G	A	G	-1.20942	0.0388857
1	219472215	chr1:219472215:G:A	G	A	0.632917	0.0259982
1	219943292	chr1:219943292:G:T	G	T	0.641396	0.0367037
1	219970421	chr1:219970421:A:AT	A	AT	0.509599	0.00143289
1	219989594	chr1:219989594:C:T	C	T	-0.683664	0.00464133
1	220113640	chr1:220113640:G:T	G	T	-0.480583	0.00743097
1	220159826	chr1:220159826:C:T	C	T	-1.18736	0.00979408
1	220674454	chr1:220674454:A:G	A	G	-0.638311	0.0366843
1	220800041	chr1:220800041:T:G	T	G	0.396042	0.0144081
1	220834977	chr1:220834977:A:G	A	G	-0.342442	0.0327691
1	220836165	chr1:220836165:T:C	T	C	0.875973	0.000621235
1	221052007	chr1:221052007:C:A	C	A	0.632815	0.018856
1	221082647	chr1:221082647:A:G	A	G	-0.504978	0.00204115
1	221270267	chr1:221270267:C:T	C	T	0.40373	0.0155368
1	221298342	chr1:221298342:T:C	T	C	-0.441891	0.00466098
1	221350275	chr1:221350275:G:T	G	T	-0.678386	0.00199165
1	221408453	chr1:221408453:G:T	G	T	-0.309337	0.0453901
1	221482461	chr1:221482461:G:A	G	A	-0.573441	0.0284104
1	221492326	chr1:221492326:T:G	T	G	-0.423	0.00975527
1	221523427	chr1:221523427:T:C	T	C	-0.820536	0.0306028
1	221544967	chr1:221544967:A:G	A	G	-1.24466	0.0113445
1	221572252	chr1:221572252:A:G	A	G	-0.314387	0.0473057
1	221704186	chr1:221704186:A:C	A	C	-0.436167	0.00813294
1	221761450	chr1:221761450:A:G	A	G	-0.326876	0.0306964
1	221765880	chr1:221765880:C:T	C	T	-0.66047	0.00126629
1	221775527	chr1:221775527:T:C	T	C	-0.321146	0.0427828
1	221779842	chr1:221779842:C:T	C	T	-0.428539	0.0290597
1	221840915	chr1:221840915:A:G	A	G	0.297834	0.0448748
1	221902866	chr1:221902866:A:C	A	C	0.458306	0.0088827
1	221939292	chr1:221939292:A:G	A	G	-0.44822	0.0155678
1	222070113	chr1:222070113:T:C	T	C	-0.340665	0.0302141
1	222103894	chr1:222103894:C:A	C	A	0.829908	0.0133294
1	222291704	chr1:222291704:A:G	A	G	-0.645646	0.0189638
1	222547355	chr1:222547355:C:T	C	T	0.53117	0.0065797
1	222700625	chr1:222700625:G:A	G	A	0.391122	0.0106198
1	222950406	chr1:222950406:C:T	C	T	-0.333829	0.0487783
1	222999353	chr1:222999353:A:G	A	G	0.508324	0.0352039
1	223043360	chr1:223043360:G:A	G	A	-0.835295	0.0195869
1	223086443	chr1:223086443:A:C	A	C	0.659058	0.00832891
1	223414173	chr1:223414173:A:C	A	C	0.496962	0.00893042
1	223476536	chr1:223476536:T:C	T	C	-0.831315	0.00255492
1	223628350	chr1:223628350:A:G	A	G	-0.462661	0.0451793
1	223644243	chr1:223644243:T:C	T	C	-0.401786	0.00818896
1	223772257	chr1:223772257:G:A	G	A	-0.575222	0.0171128
1	223914716	chr1:223914716:G:A	G	A	0.451625	0.0183146
1	224526745	chr1:224526745:A:G	A	G	0.40127	0.0112167
1	224558875	chr1:224558875:A:G	A	G	-0.793549	0.020034
1	224694268	chr1:224694268:A:G	A	G	0.45708	0.0229976
1	225056360	chr1:225056360:C:T	C	T	2.38803	0.0280303
1	225140728	chr1:225140728:T:G	T	G	1.01407	0.00569332
1	225241503	chr1:225241503:T:C	T	C	-0.381987	0.0157758
1	225314213	chr1:225314213:G:A	G	A	0.62821	0.00962153
1	225365582	chr1:225365582:G:A	G	A	-0.809889	0.0322998
1	225388356	chr1:225388356:T:C	T	C	0.368673	0.0240271
1	225672216	chr1:225672216:G:T	G	T	-0.30975	0.0478871
1	225747667	chr1:225747667:G:A	G	A	-0.338056	0.0340807
1	225804535	chr1:225804535:A:G	A	G	-0.386493	0.0287907
1	225959389	chr1:225959389:A:C	A	C	-0.952332	0.0214011
1	225982265	chr1:225982265:G:A	G	A	0.516708	0.0091467
1	226093214	chr1:226093214:C:A	C	A	-1.02496	0.00589981
1	226100232	chr1:226100232:A:C	A	C	-1.83005	0.00531781
1	226289330	chr1:226289330:A:C	A	C	-0.893878	0.00331652
1	226320944	chr1:226320944:C:T	C	T	-0.373492	0.0236966
1	226358153	chr1:226358153:G:A	G	A	0.37065	0.0398155
1	226422763	chr1:226422763:A:G	A	G	-0.365367	0.0287651
1	226477881	chr1:226477881:C:T	C	T	-0.932598	0.0256526
1	226501249	chr1:226501249:C:A	C	A	-0.482065	0.00529542
1	226502243	chr1:226502243:G:A	G	A	1.30406	0.0274029
1	226736237	chr1:226736237:A:C	A	C	0.327837	0.0280534
1	226850688	chr1:226850688:T:G	T	G	-0.432105	0.0372138
1	226936959	chr1:226936959:C:T	C	T	-0.708376	0.013299
1	227097934	chr1:227097934:C:T	C	T	-0.451564	0.019511
1	227374494	chr1:227374494:T:C	T	C	-0.890279	0.000202817
1	227374628	chr1:227374628:C:T	C	T	0.422815	0.00738313
1	227447570	chr1:227447570:G:A	G	A	1.14217	0.0449236
1	227499174	chr1:227499174:G:A	G	A	-0.534965	0.000910266
1	227775790	chr1:227775790:G:T	G	T	-0.67506	0.00157066
1	227777440	chr1:227777440:C:T	C	T	1.68864	0.0413157
1	227818655	chr1:227818655:G:A	G	A	1.07302	0.0166218
1	227925735	chr1:227925735:T:C	T	C	-0.562165	0.0395901
1	227999777	chr1:227999777:A:C	A	C	-0.670678	0.0124271
1	228036452	chr1:228036452:T:G	T	G	0.424691	0.00958751
1	228252767	chr1:228252767:T:G	T	G	0.439647	0.0119657
1	228445366	chr1:228445366:T:C	T	C	-1.54574	0.020394
1	228753917	chr1:228753917:A:G	A	G	-0.439929	0.0235784
1	228788588	chr1:228788588:G:A	G	A	0.354402	0.0277435
1	228940886	chr1:228940886:C:T	C	T	-0.58732	0.0284914
1	228982231	chr1:228982231:G:A	G	A	0.454818	0.028535
1	228996921	chr1:228996921:C:T	C	T	-0.52568	0.00182924
1	229005840	chr1:229005840:C:A	C	A	0.364758	0.017798
1	229022005	chr1:229022005:T:C	T	C	0.453754	0.0321534
1	229115430	chr1:229115430:T:C	T	C	-0.326338	0.0333416
1	229236412	chr1:229236412:A:G	A	G	-0.376619	0.0127054
1	229337878	chr1:229337878:G:A	G	A	0.444155	0.0105192
1	229415599	chr1:229415599:G:A	G	A	0.316498	0.0391136
1	229582511	chr1:229582511:T:C	T	C	-0.504535	0.00578505
1	229587522	chr1:229587522:T:G	T	G	0.446936	0.0246864
1	229701516	chr1:229701516:G:A	G	A	0.372571	0.0487495
1	229975399	chr1:229975399:A:G	A	G	-0.84224	0.0110912
1	230012810	chr1:230012810:T:C	T	C	-0.53011	0.0248549
1	230082041	chr1:230082041:G:A	G	A	-0.836996	0.0253588
1	230096573	chr1:230096573:T:G	T	G	1.1429	0.0360405
1	230189055	chr1:230189055:G:A	G	A	-0.432131	0.0247712
1	230191822	chr1:230191822:C:T	C	T	-0.485944	0.0192003
1	230283406	chr1:230283406:C:T	C	T	0.319137	0.0336368
1	230300069	chr1:230300069:C:T	C	T	1.37489	0.00433147
1	230311576	chr1:230311576:G:T	G	T	-0.398666	0.0251886
1	230316232	chr1:230316232:G:A	G	A	-0.420779	0.029932
1	230399202	chr1:230399202:C:T	C	T	-1.50521	0.0222386
1	230679451	chr1:230679451:G:A	G	A	0.632425	0.0337462
1	230684884	chr1:230684884:G:A	G	A	0.42679	0.0111055
1	230766636	chr1:230766636:A:G	A	G	0.39231	0.0120434
1	230792125	chr1:230792125:T:C	T	C	0.358139	0.0235835
1	230955258	chr1:230955258:C:T	C	T	0.700934	0.045945
1	231001186	chr1:231001186:A:G	A	G	-0.772156	0.0253785
1	231072392	chr1:231072392:T:G	T	G	0.694534	0.000914062
1	231101519	chr1:231101519:T:C	T	C	2.25411	0.0385554
1	231612661	chr1:231612661:A:G	A	G	0.950799	0.010899
1	231761122	chr1:231761122:C:T	C	T	0.494423	0.0260365
1	231764183	chr1:231764183:C:T	C	T	0.320767	0.0473054
1	231774092	chr1:231774092:A:G	A	G	0.509232	0.0126938
1	231782131	chr1:231782131:T:G	T	G	-0.487821	0.0236136
1	231884340	chr1:231884340:G:A	G	A	-0.593444	0.0019441
1	231894633	chr1:231894633:G:A	G	A	0.312233	0.0474361
1	231919503	chr1:231919503:G:A	G	A	0.314763	0.0419551
1	231958513	chr1:231958513:G:A	G	A	-0.544591	0.00437522
1	232028357	chr1:232028357:A:G	A	G	-0.410854	0.00886622
1	232032089	chr1:232032089:C:A	C	A	-0.486974	0.00274825
1	232123011	chr1:232123011:G:A	G	A	0.67277	3.76854e-05
1	232151389	chr1:232151389:T:G	T	G	-0.642558	0.0410435
1	232168498	chr1:232168498:C:A	C	A	0.795296	0.0250695
1	232229873	chr1:232229873:G:A	G	A	0.355842	0.0261144
1	232233294	chr1:232233294:A:G	A	G	0.780854	0.0038097
1	232307317	chr1:232307317:T:C	T	C	0.524283	0.0374515
1	232313721	chr1:232313721:G:T	G	T	0.36397	0.0478933
1	232371947	chr1:232371947:G:T	G	T	0.574401	0.0492671
1	232377920	chr1:232377920:T:G	T	G	0.34574	0.0449759
1	232397269	chr1:232397269:T:C	T	C	-0.328951	0.0372944
1	232505423	chr1:232505423:T:C	T	C	0.369545	0.0428681
1	232541886	chr1:232541886:A:G	A	G	0.429092	0.00614622
1	232568973	chr1:232568973:T:G	T	G	-1.45689	0.0112574
1	232581589	chr1:232581589:T:C	T	C	-0.365657	0.0425873
1	232618483	chr1:232618483:G:A	G	A	0.578585	0.000504046
1	232625370	chr1:232625370:G:A	G	A	-0.375425	0.0153333
1	232634329	chr1:232634329:T:C	T	C	-0.318839	0.0421331
1	232859864	chr1:232859864:A:G	A	G	1.1308	0.0237117
1	233155123	chr1:233155123:T:C	T	C	0.67882	0.0107213
1	233346917	chr1:233346917:T:C	T	C	-0.386121	0.0362983
1	233431784	chr1:233431784:A:G	A	G	-0.72384	0.0126874
1	233502009	chr1:233502009:T:C	T	C	-0.478392	0.0330241
1	233506426	chr1:233506426:T:G	T	G	-0.525809	0.00715415
1	233515768	chr1:233515768:G:A	G	A	-2.1107	0.0470401
1	233618833	chr1:233618833:A:G	A	G	-0.557746	0.00639488
1	233623797	chr1:233623797:T:G	T	G	0.417172	0.0359472
1	233716413	chr1:233716413:A:G	A	G	1.23203	0.0181735
1	233791834	chr1:233791834:G:A	G	A	-0.36429	0.025246
1	233828579	chr1:233828579:A:G	A	G	0.568642	0.00382819
1	233849297	chr1:233849297:C:T	C	T	-0.636351	0.0163349
1	233858171	chr1:233858171:C:T	C	T	0.832451	0.0206588
1	233862321	chr1:233862321:T:C	T	C	-0.364635	0.0207903
1	233954208	chr1:233954208:G:A	G	A	-0.645794	0.0085084
1	234272773	chr1:234272773:G:A	G	A	-0.928256	0.0399775
1	234280060	chr1:234280060:T:C	T	C	0.429901	0.00631594
1	234290560	chr1:234290560:T:C	T	C	-0.393518	0.0310393
1	234293046	chr1:234293046:G:A	G	A	0.410085	0.0275276
1	234293916	chr1:234293916:G:A	G	A	-0.504814	0.0298522
1	234298412	chr1:234298412:T:C	T	C	-0.521889	0.00552367
1	234457114	chr1:234457114:C:T	C	T	0.725764	0.0127566
1	234705000	chr1:234705000:A:G	A	G	-0.820606	0.0286404
1	234745702	chr1:234745702:C:T	C	T	-0.331261	0.0317731
1	234891998	chr1:234891998:T:G	T	G	-0.601656	0.0440252
1	234926226	chr1:234926226:T:C	T	C	-0.322651	0.0495345
1	235040717	chr1:235040717:A:G	A	G	-0.362637	0.0209044
1	235107459	chr1:235107459:C:T	C	T	-0.418064	0.0126889
1	235519188	chr1:235519188:C:A	C	A	1.17625	0.0115595
1	235604473	chr1:235604473:C:T	C	T	-0.527249	0.00219415
1	235892265	chr1:235892265:T:C	T	C	0.353521	0.0188798
1	236001440	chr1:236001440:C:T	C	T	-1.12217	0.0164161
1	236033257	chr1:236033257:A:G	A	G	0.534364	0.00184696
1	236098248	chr1:236098248:T:C	T	C	-0.413727	0.00792674
1	236099073	chr1:236099073:G:A	G	A	-0.510265	0.012517
1	236149827	chr1:236149827:T:C	T	C	2.39783	0.0254541
1	236156074	chr1:236156074:T:C	T	C	2.23432	0.0356993
1	236399578	chr1:236399578:G:T	G	T	0.329755	0.0416813
1	236456229	chr1:236456229:G:A	G	A	0.347897	0.0300636
1	236503275	chr1:236503275:A:C	A	C	-1.09081	0.0194279
1	236516953	chr1:236516953:A:G	A	G	-0.422736	0.0496953
1	236543205	chr1:236543205:C:T	C	T	-0.832209	0.0252818
1	236628598	chr1:236628598:C:A	C	A	0.354397	0.0421669
1	236713584	chr1:236713584:A:G	A	G	-0.447426	0.0475227
1	236718403	chr1:236718403:T:G	T	G	-0.517982	0.0155918
1	236748156	chr1:236748156:T:C	T	C	1.23128	0.00732957
1	236760090	chr1:236760090:C:A	C	A	0.684923	0.00888012
1	236766400	chr1:236766400:G:A	G	A	0.650512	0.00635064
1	236795232	chr1:236795232:G:T	G	T	-0.31208	0.0391971
1	237055873	chr1:237055873:C:T	C	T	-0.39805	0.0323377
1	237065640	chr1:237065640:G:A	G	A	-0.49001	0.0120415
1	237083927	chr1:237083927:T:C	T	C	-0.498621	0.0458683
1	237093301	chr1:237093301:A:G	A	G	-1.17368	0.0236158
1	237094066	chr1:237094066:C:T	C	T	-0.39457	0.0153544
1	237112356	chr1:237112356:C:T	C	T	-0.538911	0.0124771
1	237118454	chr1:237118454:C:A	C	A	2.01441	0.00812307
1	237186357	chr1:237186357:C:T	C	T	0.34041	0.0281712
1	237552637	chr1:237552637:C:T	C	T	1.29522	0.0380571
1	237613602	chr1:237613602:A:G	A	G	-0.846161	0.0175812
1	237626017	chr1:237626017:A:G	A	G	-0.476244	0.0499001
1	237645479	chr1:237645479:C:T	C	T	-0.586148	0.0159256
1	237807437	chr1:237807437:G:A	G	A	0.414396	0.0205164
1	237852505	chr1:237852505:T:C	T	C	-0.432442	0.0439377
1	238307645	chr1:238307645:G:A	G	A	0.352972	0.0277861
1	238370590	chr1:238370590:T:C	T	C	-0.557516	0.0357724
1	238419065	chr1:238419065:C:A	C	A	0.303903	0.042535
1	238436421	chr1:238436421:G:T	G	T	-0.695289	0.0159945
1	238472195	chr1:238472195:C:T	C	T	-0.425613	0.0439197
1	238586249	chr1:238586249:T:C	T	C	2.81548	0.00836319
1	238587299	chr1:238587299:C:T	C	T	-0.361056	0.0230172
1	238890625	chr1:238890625:G:T	G	T	1.7092	0.0316769
1	238974724	chr1:238974724:C:T	C	T	-0.580967	0.0323771
1	239044323	chr1:239044323:C:T	C	T	0.42566	0.0187336
1	239098378	chr1:239098378:G:A	G	A	0.885042	0.0429425
1	239147828	chr1:239147828:G:A	G	A	-0.538005	0.0167168
1	239153652	chr1:239153652:C:T	C	T	-0.311425	0.0439397
1	239269563	chr1:239269563:G:A	G	A	0.94185	0.0135528
1	239572896	chr1:239572896:T:C	T	C	0.854002	0.0405898
1	239761186	chr1:239761186:G:A	G	A	-0.543283	0.0244239
1	239810870	chr1:239810870:G:A	G	A	0.439237	0.0224401
1	239884998	chr1:239884998:A:G	A	G	-0.650384	0.0232591
1	239961826	chr1:239961826:T:C	T	C	1.7473	0.0339322
1	240000144	chr1:240000144:C:A	C	A	-1.01037	0.0424494
1	240172527	chr1:240172527:A:G	A	G	-0.999459	0.0110688
1	240221042	chr1:240221042:C:T	C	T	0.510038	0.0144952
1	240317715	chr1:240317715:A:G	A	G	-0.400532	0.0289083
1	240407675	chr1:240407675:C:T	C	T	0.588613	0.0412316
1	240535635	chr1:240535635:C:T	C	T	0.331107	0.0433004
1	240614880	chr1:240614880:T:C	T	C	0.472105	0.0231262
1	240639870	chr1:240639870:A:G	A	G	0.418304	0.044603
1	240653476	chr1:240653476:C:T	C	T	-0.541472	0.0485615
1	240664684	chr1:240664684:C:T	C	T	-0.340987	0.0383183
1	240681095	chr1:240681095:T:C	T	C	-0.741186	0.00525918
1	240681139	chr1:240681139:G:A	G	A	0.365886	0.0372051
1	240696896	chr1:240696896:G:A	G	A	-0.986624	0.021777
1	240741534	chr1:240741534:G:A	G	A	-0.375574	0.0321278
1	240780472	chr1:240780472:C:T	C	T	0.949275	0.0411483
1	240884402	chr1:240884402:C:T	C	T	0.328937	0.0344149
1	241005235	chr1:241005235:A:G	A	G	-0.381653	0.0238316
1	241008809	chr1:241008809:C:T	C	T	0.385291	0.0497716
1	241014709	chr1:241014709:C:T	C	T	-0.346562	0.0417762
1	241019672	chr1:241019672:A:C	A	C	-0.569806	0.0314038
1	241190763	chr1:241190763:G:A	G	A	-0.545012	0.00287854
1	241207945	chr1:241207945:A:G	A	G	0.464569	0.010311
1	241214335	chr1:241214335:C:T	C	T	-0.598865	0.00243976
1	241410356	chr1:241410356:A:G	A	G	0.566696	0.0177922
1	241613097	chr1:241613097:A:G	A	G	-0.485056	0.00256415
1	241630754	chr1:241630754:C:A	C	A	-0.309866	0.0483421
1	241648445	chr1:241648445:G:A	G	A	0.51908	0.0407614
1	241656785	chr1:241656785:G:A	G	A	0.619201	0.0378551
1	241686501	chr1:241686501:T:C	T	C	-0.484537	0.00404167
1	241727227	chr1:241727227:T:C	T	C	-0.504005	0.00696171
1	241732341	chr1:241732341:C:T	C	T	-0.846954	7.65634e-05
1	241789999	chr1:241789999:T:C	T	C	0.34928	0.0316483
1	241846005	chr1:241846005:G:A	G	A	-0.489316	0.00931242
1	241930162	chr1:241930162:T:C	T	C	0.430343	0.0176974
1	241973634	chr1:241973634:T:C	T	C	-0.918872	0.0129418
1	241976002	chr1:241976002:G:A	G	A	-0.398524	0.035974
1	241985164	chr1:241985164:C:T	C	T	0.500346	0.0027194
1	241994890	chr1:241994890:T:C	T	C	-0.318607	0.0498089
1	242029188	chr1:242029188:G:A	G	A	0.422531	0.0220545
1	242096885	chr1:242096885:C:A	C	A	-0.538665	0.00419217
1	242118153	chr1:242118153:T:C	T	C	0.580266	0.0465427
1	242256587	chr1:242256587:G:A	G	A	-0.674774	0.0421369
1	242263772	chr1:242263772:A:G	A	G	-1.58986	0.0103213
1	242271947	chr1:242271947:C:T	C	T	0.402427	0.0103333
1	242307348	chr1:242307348:C:T	C	T	-0.511143	0.0128317
1	242381340	chr1:242381340:C:T	C	T	0.826339	0.00538198
1	242397434	chr1:242397434:A:G	A	G	0.328704	0.0400052
1	242452584	chr1:242452584:G:A	G	A	-0.640688	0.00911845
1	242462518	chr1:242462518:C:T	C	T	0.324282	0.0470521
1	242502993	chr1:242502993:A:G	A	G	-0.445682	0.0377599
1	242554893	chr1:242554893:G:A	G	A	-0.590688	0.0472059
1	242554979	chr1:242554979:A:G	A	G	-0.408454	0.0160311
1	242635486	chr1:242635486:G:A	G	A	-0.746155	0.000326985
1	242750907	chr1:242750907:C:T	C	T	-0.625528	0.0391793
1	242765008	chr1:242765008:C:T	C	T	0.358493	0.0216725
1	242888168	chr1:242888168:T:C	T	C	0.816718	0.0188141
1	242928717	chr1:242928717:T:C	T	C	0.368187	0.0174217
1	244152616	chr1:244152616:G:A	G	A	1.38872	0.0101373
1	244225916	chr1:244225916:T:C	T	C	-0.502926	0.00790788
1	244615666	chr1:244615666:C:T	C	T	0.430824	0.0454187
1	244684432	chr1:244684432:A:G	A	G	0.388159	0.0350002
1	244742050	chr1:244742050:C:T	C	T	-0.661571	0.0281225
1	244803551	chr1:244803551:A:G	A	G	0.369894	0.04715
1	244893405	chr1:244893405:A:G	A	G	0.580657	0.0219833
1	245045317	chr1:245045317:G:A	G	A	0.644604	0.00858752
1	245197588	chr1:245197588:G:A	G	A	0.54114	0.0214839
1	245386423	chr1:245386423:C:T	C	T	0.727482	0.0339968
1	245387092	chr1:245387092:G:A	G	A	-0.38496	0.0149505
1	245409735	chr1:245409735:C:T	C	T	-0.820527	0.0319632
1	245430370	chr1:245430370:G:A	G	A	-0.645452	0.0116893
1	245438885	chr1:245438885:T:C	T	C	0.507622	0.012015
1	245473737	chr1:245473737:C:T	C	T	-0.784564	0.0284413
1	245506929	chr1:245506929:G:A	G	A	0.494665	0.0110436
1	245514505	chr1:245514505:G:T	G	T	-0.432688	0.0234041
1	245557370	chr1:245557370:C:T	C	T	0.547081	0.0138004
1	245561946	chr1:245561946:G:A	G	A	0.517887	0.0247235
1	245605995	chr1:245605995:C:T	C	T	2.29069	0.00375729
1	245652253	chr1:245652253:T:C	T	C	-0.332401	0.0406382
1	245698269	chr1:245698269:C:T	C	T	-0.367379	0.0223011
1	245715840	chr1:245715840:C:A	C	A	-0.914462	0.00770111
1	245762928	chr1:245762928:C:T	C	T	-0.627815	0.0261961
1	245787340	chr1:245787340:G:A	G	A	0.49026	0.0113132
1	245797566	chr1:245797566:C:T	C	T	-0.513686	0.0337014
1	245817416	chr1:245817416:C:T	C	T	-0.903867	0.0326465
1	246031312	chr1:246031312:G:A	G	A	-0.731632	0.0268283
1	246049357	chr1:246049357:T:C	T	C	-0.434726	0.0355794
1	246365757	chr1:246365757:T:C	T	C	-1.02179	0.0232786
1	246384543	chr1:246384543:C:A	C	A	-0.623839	0.0111297
1	246407284	chr1:246407284:A:G	A	G	-0.589774	0.0498057
1	246443624	chr1:246443624:A:G	A	G	-2.43481	0.0227932
1	246540321	chr1:246540321:G:A	G	A	0.461079	0.0374478
1	246547585	chr1:246547585:A:G	A	G	-0.437664	0.0176646
1	246972397	chr1:246972397:G:T	G	T	-0.83783	0.00893416
1	247136477	chr1:247136477:T:C	T	C	-0.85907	0.00508346
1	247162260	chr1:247162260:G:A	G	A	-0.479623	0.0181113
1	247176933	chr1:247176933:C:T	C	T	-0.385943	0.0158742
1	247180692	chr1:247180692:T:C	T	C	0.3741	0.0208789
1	247205584	chr1:247205584:C:T	C	T	0.425986	0.00835235
1	247370998	chr1:247370998:C:T	C	T	0.304857	0.0429144
1	247382007	chr1:247382007:G:A	G	A	0.871035	0.00706015
1	247385813	chr1:247385813:C:A	C	A	0.368218	0.0206506
1	247390891	chr1:247390891:C:T	C	T	-0.682965	0.0472917
1	247414554	chr1:247414554:C:T	C	T	-0.436165	0.0282858
1	247459572	chr1:247459572:T:C	T	C	0.352879	0.0449898
1	247479471	chr1:247479471:G:A	G	A	-0.376434	0.0215429
1	247584460	chr1:247584460:G:A	G	A	-0.75707	0.016948
1	247766208	chr1:247766208:T:C	T	C	0.37284	0.0227042
1	247886899	chr1:247886899:G:A	G	A	-0.330496	0.034806
1	247905818	chr1:247905818:C:T	C	T	0.495012	0.00274843
1	247912118	chr1:247912118:A:G	A	G	0.429693	0.0238538
1	247974711	chr1:247974711:C:T	C	T	0.326981	0.0481729
1	248189337	chr1:248189337:G:A	G	A	-0.360107	0.0267382
1	248379052	chr1:248379052:A:G	A	G	-0.39885	0.0342194
1	248528740	chr1:248528740:G:T	G	T	0.565171	0.038079
2	221981	chr2:221981:C:T	C	T	0.489218	0.00612961
2	312992	chr2:312992:C:T	C	T	0.541546	0.0260006
2	352596	chr2:352596:T:C	T	C	0.876444	0.0157815
2	382409	chr2:382409:A:G	A	G	-0.34866	0.0394177
2	386507	chr2:386507:A:G	A	G	-0.951275	0.00828608
2	478095	chr2:478095:T:G	T	G	-0.501609	0.00339713
2	619641	chr2:619641:C:T	C	T	0.339024	0.0421018
2	656322	chr2:656322:T:C	T	C	-0.604895	0.0163834
2	686675	chr2:686675:G:T	G	T	0.428218	0.0211134
2	777141	chr2:777141:G:A	G	A	-0.439626	0.048773
2	778672	chr2:778672:G:A	G	A	-0.376491	0.0200079
2	1029849	chr2:1029849:C:A	C	A	0.4892	0.00360835
2	1051310	chr2:1051310:A:G	A	G	-0.638523	0.00694187
2	1140847	chr2:1140847:A:G	A	G	0.447503	0.0378274
2	1142463	chr2:1142463:C:T	C	T	0.376239	0.0170658
2	1182547	chr2:1182547:A:G	A	G	1.84218	0.0266544
2	1280248	chr2:1280248:T:C	T	C	-0.357921	0.0263658
2	1413472	chr2:1413472:A:G	A	G	0.35249	0.0272792
2	1441511	chr2:1441511:T:C	T	C	-0.423741	0.0319948
2	1625192	chr2:1625192:G:A	G	A	-0.646041	0.00987955
2	1669198	chr2:1669198:G:A	G	A	0.48198	0.0123829
2	1676140	chr2:1676140:A:G	A	G	-0.374037	0.0172298
2	1678251	chr2:1678251:G:A	G	A	-1.43709	0.00518737
2	1687474	chr2:1687474:C:T	C	T	-1.5501	0.0173486
2	1699061	chr2:1699061:G:A	G	A	1.8583	0.0247621
2	1738782	chr2:1738782:G:A	G	A	0.418827	0.0145458
2	1744691	chr2:1744691:G:A	G	A	0.562882	0.00208973
2	1761115	chr2:1761115:C:T	C	T	-1.70268	0.0318654
2	1784483	chr2:1784483:G:A	G	A	0.337212	0.0289117
2	1953772	chr2:1953772:T:G	T	G	1.34044	0.0125187
2	1965538	chr2:1965538:G:A	G	A	0.922776	0.0300603
2	1991175	chr2:1991175:T:C	T	C	-0.858329	0.0398798
2	2086697	chr2:2086697:C:T	C	T	-0.713118	0.0107679
2	2221620	chr2:2221620:A:G	A	G	-1.29468	0.0125011
2	2465095	chr2:2465095:T:C	T	C	-2.14391	0.0433204
2	2478087	chr2:2478087:G:A	G	A	0.557195	0.0278304
2	2616280	chr2:2616280:G:A	G	A	-0.663405	0.00202205
2	2639453	chr2:2639453:C:A	C	A	0.422411	0.0182248
2	2649236	chr2:2649236:C:T	C	T	-0.554193	0.0304922
2	2668721	chr2:2668721:C:A	C	A	-0.665185	0.00228355
2	2672959	chr2:2672959:C:T	C	T	0.897064	0.00530236
2	2678775	chr2:2678775:A:G	A	G	0.79555	0.0190102
2	2708334	chr2:2708334:C:T	C	T	0.418607	0.0143306
2	2717360	chr2:2717360:A:G	A	G	-0.378428	0.0243085
2	2942274	chr2:2942274:T:C	T	C	0.413903	0.026839
2	2959950	chr2:2959950:T:C	T	C	0.883654	0.00579241
2	3002624	chr2:3002624:T:G	T	G	0.36599	0.0188734
2	3031452	chr2:3031452:C:T	C	T	0.549232	0.0281089
2	3053387	chr2:3053387:A:G	A	G	0.868367	0.0159182
2	3059354	chr2:3059354:A:G	A	G	0.504668	0.00195571
2	3085456	chr2:3085456:C:T	C	T	0.4862	0.0404002
2	3088949	chr2:3088949:T:C	T	C	0.75058	0.00296469
2	3105918	chr2:3105918:G:A	G	A	-1.46602	0.0250419
2	3112301	chr2:3112301:C:T	C	T	0.568987	0.0178385
2	3123438	chr2:3123438:T:C	T	C	0.404535	0.013696
2	3167186	chr2:3167186:A:G	A	G	-1.33715	0.0440808
2	3351287	chr2:3351287:G:A	G	A	0.563837	0.00324417
2	3375162	chr2:3375162:C:T	C	T	0.434254	0.030902
2	3383674	chr2:3383674:G:A	G	A	-0.378019	0.0212377
2	3450888	chr2:3450888:G:A	G	A	-0.586318	0.0049888
2	3455620	chr2:3455620:T:C	T	C	0.34415	0.0341786
2	3455971	chr2:3455971:A:G	A	G	0.61527	0.00401012
2	3478503	chr2:3478503:A:G	A	G	-0.376752	0.0401094
2	3494788	chr2:3494788:T:C	T	C	-0.55455	0.0053378
2	3607094	chr2:3607094:C:T	C	T	0.423673	0.048122
2	3744641	chr2:3744641:T:C	T	C	-0.489288	0.0445368
2	3746475	chr2:3746475:T:C	T	C	-0.439825	0.0116018
2	3816231	chr2:3816231:C:T	C	T	-0.511119	0.00378374
2	3868571	chr2:3868571:T:C	T	C	-0.430436	0.0244529
2	3872037	chr2:3872037:G:A	G	A	-0.675945	0.015619
2	3912337	chr2:3912337:G:A	G	A	0.527537	0.0116086
2	4109050	chr2:4109050:G:A	G	A	0.342634	0.0488127
2	4275995	chr2:4275995:C:T	C	T	-1.67778	0.0296975
2	4345240	chr2:4345240:T:G	T	G	0.5597	0.0257015
2	4408968	chr2:4408968:G:A	G	A	0.790884	0.010168
2	4410272	chr2:4410272:C:T	C	T	-0.379452	0.0183213
2	4429293	chr2:4429293:G:A	G	A	-0.421789	0.0355655
2	4435799	chr2:4435799:G:A	G	A	-0.583406	0.00127311
2	4606766	chr2:4606766:A:C	A	C	-0.410142	0.047514
2	4641741	chr2:4641741:A:G	A	G	0.610467	0.00426653
2	4846133	chr2:4846133:T:C	T	C	-0.345998	0.0321948
2	4889126	chr2:4889126:A:G	A	G	0.618882	0.0204273
2	4912363	chr2:4912363:G:T	G	T	0.519528	0.00157503
2	4926141	chr2:4926141:C:T	C	T	0.341683	0.0335237
2	4938166	chr2:4938166:A:C	A	C	0.575159	0.0146199
2	4963197	chr2:4963197:A:G	A	G	-0.344604	0.0299757
2	4973589	chr2:4973589:G:A	G	A	0.392254	0.0208181
2	5094832	chr2:5094832:G:A	G	A	-0.456004	0.00534242
2	5136946	chr2:5136946:A:C	A	C	0.570093	0.00243341
2	5217083	chr2:5217083:C:T	C	T	-0.328694	0.0411694
2	5407971	chr2:5407971:A:G	A	G	-0.342708	0.0458164
2	5520578	chr2:5520578:G:A	G	A	0.445733	0.0378032
2	5619670	chr2:5619670:T:C	T	C	-0.884282	0.0152949
2	5655281	chr2:5655281:A:G	A	G	0.682228	0.00558083
2	5921238	chr2:5921238:T:G	T	G	0.659081	0.000889468
2	5941735	chr2:5941735:G:A	G	A	0.364776	0.0248504
2	6051626	chr2:6051626:G:A	G	A	1.04211	0.0278606
2	6089882	chr2:6089882:G:T	G	T	0.711265	0.00579626
2	6171618	chr2:6171618:G:T	G	T	0.607356	0.00427542
2	6459785	chr2:6459785:C:T	C	T	-0.467424	0.0419998
2	6500839	chr2:6500839:C:T	C	T	-2.28331	0.0337384
2	6551882	chr2:6551882:T:C	T	C	0.31023	0.0475358
2	6555997	chr2:6555997:T:C	T	C	1.64137	0.0431031
2	6584989	chr2:6584989:G:A	G	A	-0.405718	0.0369763
2	6782652	chr2:6782652:C:T	C	T	0.472912	0.0311784
2	6828874	chr2:6828874:C:T	C	T	0.583918	0.0353761
2	6849902	chr2:6849902:T:C	T	C	1.785	0.0407866
2	6904083	chr2:6904083:T:C	T	C	0.342933	0.0382904
2	6971378	chr2:6971378:T:C	T	C	-0.400149	0.0498933
2	7114705	chr2:7114705:T:C	T	C	0.354213	0.0307635
2	7285376	chr2:7285376:T:C	T	C	-0.572474	0.00267527
2	7413307	chr2:7413307:T:C	T	C	-0.30586	0.0483873
2	7431867	chr2:7431867:G:A	G	A	-0.542709	0.00360862
2	7441089	chr2:7441089:C:T	C	T	-0.772045	0.00277808
2	7772523	chr2:7772523:C:T	C	T	-0.46468	0.0255414
2	7861451	chr2:7861451:T:C	T	C	-0.342016	0.0284026
2	7998014	chr2:7998014:G:T	G	T	0.584787	0.036385
2	8033293	chr2:8033293:A:G	A	G	1.69976	0.0362626
2	8085679	chr2:8085679:G:T	G	T	0.338173	0.029809
2	8244760	chr2:8244760:G:A	G	A	1.47384	0.0293664
2	8330972	chr2:8330972:T:C	T	C	-0.444178	0.0252396
2	8361778	chr2:8361778:C:T	C	T	-0.706266	0.030109
2	8367297	chr2:8367297:G:A	G	A	-0.451342	0.00555182
2	8415954	chr2:8415954:A:G	A	G	0.698454	0.0039098
2	8416383	chr2:8416383:T:C	T	C	-0.708246	0.022566
2	8488370	chr2:8488370:A:G	A	G	1.72787	0.00264678
2	8494249	chr2:8494249:A:G	A	G	1.6069	0.0465526
2	8511236	chr2:8511236:A:C	A	C	-0.413774	0.0151003
2	8636734	chr2:8636734:G:A	G	A	0.342653	0.0291491
2	8648503	chr2:8648503:A:G	A	G	-0.675757	0.0266353
2	9095457	chr2:9095457:G:A	G	A	-0.445585	0.0457352
2	9175354	chr2:9175354:T:C	T	C	-0.311336	0.0414848
2	9271603	chr2:9271603:T:G	T	G	-0.47558	0.00651704
2	9570926	chr2:9570926:G:A	G	A	0.65472	0.0118916
2	9633457	chr2:9633457:T:C	T	C	-0.302163	0.0496207
2	9686332	chr2:9686332:G:A	G	A	0.326085	0.0383671
2	9690131	chr2:9690131:C:A	C	A	0.411769	0.0117189
2	9766079	chr2:9766079:A:G	A	G	0.55587	0.00232885
2	9772599	chr2:9772599:A:G	A	G	0.477447	0.02393
2	9790548	chr2:9790548:G:A	G	A	0.535747	0.0152014
2	9812070	chr2:9812070:T:C	T	C	-0.323133	0.0425289
2	9814061	chr2:9814061:T:C	T	C	-0.785966	0.00488838
2	9920851	chr2:9920851:A:G	A	G	-0.590147	0.00413591
2	9926787	chr2:9926787:G:A	G	A	0.542898	0.0196454
2	9940327	chr2:9940327:C:T	C	T	-1.01521	0.00479261
2	10183856	chr2:10183856:G:A	G	A	-0.423251	0.0474071
2	10183861	chr2:10183861:G:A	G	A	0.326044	0.0428422
2	10219410	chr2:10219410:G:A	G	A	-0.904243	0.00202404
2	10228550	chr2:10228550:A:G	A	G	-0.412662	0.0153299
2	10249829	chr2:10249829:A:G	A	G	-0.331617	0.043898
2	10263999	chr2:10263999:T:C	T	C	-0.461804	0.00368657
2	10296317	chr2:10296317:T:G	T	G	0.370471	0.0357763
2	10305555	chr2:10305555:G:T	G	T	-0.437365	0.0126643
2	10320304	chr2:10320304:T:C	T	C	1.16023	0.0357113
2	10328371	chr2:10328371:C:T	C	T	0.832626	0.00203847
2	10346761	chr2:10346761:G:A	G	A	0.546572	0.0324255
2	10359904	chr2:10359904:G:A	G	A	0.42706	0.00735406
2	10396997	chr2:10396997:G:T	G	T	-0.737469	0.0352773
2	10426288	chr2:10426288:G:A	G	A	-0.483969	0.0148226
2	10467962	chr2:10467962:T:C	T	C	-0.432615	0.0362304
2	10471995	chr2:10471995:T:C	T	C	0.478887	0.0049407
2	10475258	chr2:10475258:G:T	G	T	0.698359	0.0228386
2	10477899	chr2:10477899:G:A	G	A	0.458142	0.0151824
2	10478444	chr2:10478444:A:G	A	G	0.482186	0.0472124
2	10480041	chr2:10480041:A:G	A	G	-0.54108	0.00279401
2	10556457	chr2:10556457:G:A	G	A	-0.609317	0.000271577
2	10559824	chr2:10559824:C:T	C	T	0.763275	0.0241308
2	10717637	chr2:10717637:G:A	G	A	-0.399231	0.016997
2	10734386	chr2:10734386:G:A	G	A	0.56575	0.00198579
2	10765907	chr2:10765907:C:T	C	T	-0.649688	0.00149368
2	11025165	chr2:11025165:T:G	T	G	0.328499	0.0376167
2	11037704	chr2:11037704:T:C	T	C	-0.576372	0.0163913
2	11095036	chr2:11095036:T:C	T	C	-0.538581	0.00317573
2	11420068	chr2:11420068:C:A	C	A	-0.333408	0.042717
2	11535463	chr2:11535463:A:G	A	G	0.729661	0.000905792
2	11555034	chr2:11555034:A:G	A	G	1.12827	0.0417976
2	11730179	chr2:11730179:C:T	C	T	0.427043	0.022548
2	11779372	chr2:11779372:G:A	G	A	0.495332	0.0466714
2	11840513	chr2:11840513:A:C	A	C	-0.387964	0.0167734
2	11989945	chr2:11989945:C:T	C	T	0.3577	0.026057
2	12105909	chr2:12105909:A:G	A	G	0.55142	0.00517562
2	12111187	chr2:12111187:A:C	A	C	0.639081	0.00480199
2	12149743	chr2:12149743:G:A	G	A	0.695642	0.0039397
2	12248393	chr2:12248393:A:G	A	G	0.704871	0.0352538
2	12428663	chr2:12428663:G:A	G	A	-0.448454	0.0246835
2	12505433	chr2:12505433:G:A	G	A	-0.372917	0.0156232
2	12537624	chr2:12537624:C:T	C	T	0.422371	0.0284437
2	12546279	chr2:12546279:G:T	G	T	-0.32988	0.0420261
2	12552385	chr2:12552385:C:T	C	T	1.15916	0.0260117
2	12586443	chr2:12586443:T:G	T	G	-0.54565	0.0284505
2	12620338	chr2:12620338:G:A	G	A	-1.98757	0.00860112
2	12759209	chr2:12759209:G:A	G	A	0.455207	0.00796903
2	12970354	chr2:12970354:G:T	G	T	0.434777	0.0301451
2	13470530	chr2:13470530:T:C	T	C	0.94459	0.0488798
2	13541737	chr2:13541737:A:G	A	G	0.361111	0.0303849
2	13593398	chr2:13593398:G:A	G	A	0.870844	0.00480404
2	13664301	chr2:13664301:A:G	A	G	0.498772	0.0206436
2	13927239	chr2:13927239:A:G	A	G	0.381256	0.0145033
2	14182427	chr2:14182427:T:C	T	C	-0.337482	0.0315095
2	14507156	chr2:14507156:G:A	G	A	0.342209	0.0228676
2	14927419	chr2:14927419:C:T	C	T	-0.486492	0.0114038
2	15067686	chr2:15067686:A:G	A	G	0.709435	0.00309485
2	15164930	chr2:15164930:C:T	C	T	-0.806461	0.00261402
2	15689570	chr2:15689570:C:A	C	A	-0.425263	0.00323387
2	15689622	chr2:15689622:C:T	C	T	0.530642	0.0435761
2	15805502	chr2:15805502:A:G	A	G	-0.420576	0.0051774
2	15835463	chr2:15835463:C:T	C	T	0.352264	0.0289625
2	15893405	chr2:15893405:C:A	C	A	-0.554767	0.0299298
2	15981742	chr2:15981742:C:T	C	T	0.355493	0.0160786
2	16045541	chr2:16045541:T:C	T	C	-0.72507	7.00734e-05
2	16620909	chr2:16620909:A:C	A	C	0.385316	0.0358284
2	16640476	chr2:16640476:T:C	T	C	0.561307	0.00603232
2	16762035	chr2:16762035:T:C	T	C	0.731579	0.00738425
2	16856695	chr2:16856695:T:C	T	C	-0.371182	0.040092
2	16964284	chr2:16964284:C:T	C	T	0.420072	0.00714942
2	17234302	chr2:17234302:G:A	G	A	0.362263	0.0458595
2	17437658	chr2:17437658:T:C	T	C	-0.366683	0.0184242
2	17798869	chr2:17798869:C:T	C	T	0.376845	0.0228583
2	17839967	chr2:17839967:T:C	T	C	0.343018	0.0222815
2	17870214	chr2:17870214:T:G	T	G	0.50287	0.00295313
2	17894689	chr2:17894689:G:A	G	A	1.39619	0.044914
2	17961171	chr2:17961171:C:T	C	T	0.443744	0.0402478
2	18004324	chr2:18004324:T:C	T	C	0.368332	0.022896
2	18035429	chr2:18035429:C:T	C	T	0.696881	0.00932881
2	18065963	chr2:18065963:G:T	G	T	-0.467909	0.0095751
2	18224020	chr2:18224020:G:A	G	A	0.568987	0.00600757
2	18368824	chr2:18368824:G:A	G	A	0.344187	0.0266897
2	18382092	chr2:18382092:T:C	T	C	0.310376	0.0471344
[truncated: 21,539 more rows]

## Sheet: S5
CHR	POS	SNP	REF	ALT	BETA	P
1	970892	chr1:970892:A:C	A	C	-0.840895	0.0211789
1	984475	chr1:984475:G:A	G	A	-2.41719	0.0228913
1	1172897	chr1:1172897:G:A	G	A	0.816215	0.0337782
1	1186335	chr1:1186335:C:T	C	T	1.34934	0.0075499
1	1199253	chr1:1199253:C:T	C	T	-0.6019	0.0378094
1	1282706	chr1:1282706:C:T	C	T	-0.581752	0.0397577
1	1451833	chr1:1451833:G:A	G	A	-0.85355	0.0347662
1	1456891	chr1:1456891:T:C	T	C	0.780192	0.00690806
1	1950848	chr1:1950848:A:G	A	G	-1.25028	0.0112451
1	2004141	chr1:2004141:A:C	A	C	-0.803733	0.0462602
1	2035177	chr1:2035177:A:G	A	G	0.852821	0.0102309
1	2212052	chr1:2212052:G:A	G	A	1.10872	0.00684739
1	2293845	chr1:2293845:G:A	G	A	-0.624178	0.030317
1	2300024	chr1:2300024:C:T	C	T	1.159	0.00734667
1	2303464	chr1:2303464:C:T	C	T	-1.1992	5.41277e-05
1	2324572	chr1:2324572:A:G	A	G	0.907835	0.00651406
1	2364499	chr1:2364499:A:G	A	G	-0.738404	0.0479
1	2380956	chr1:2380956:C:T	C	T	0.590996	0.0419379
1	2416127	chr1:2416127:C:T	C	T	-0.957618	0.0178013
1	2424477	chr1:2424477:C:T	C	T	-0.660802	0.012116
1	2440881	chr1:2440881:A:G	A	G	0.9594	0.0156443
1	2440882	chr1:2440882:C:T	C	T	-0.818044	0.00306969
1	2453093	chr1:2453093:C:T	C	T	1.10462	0.0393593
1	2472415	chr1:2472415:G:A	G	A	0.749347	0.00792103
1	2506728	chr1:2506728:G:A	G	A	-1.03697	0.0125639
1	2620346	chr1:2620346:C:T	C	T	1.3148	0.00942352
1	2863327	chr1:2863327:T:C	T	C	0.677261	0.0184114
1	2868051	chr1:2868051:A:G	A	G	-0.763348	0.00343828
1	2888245	chr1:2888245:G:A	G	A	-1.05347	0.00119096
1	2919534	chr1:2919534:C:T	C	T	0.675887	0.0321798
1	2959960	chr1:2959960:T:C	T	C	0.798842	0.00303484
1	3018171	chr1:3018171:C:T	C	T	2.54932	0.0194124
1	3093405	chr1:3093405:G:A	G	A	-0.912526	0.00113379
1	3119198	chr1:3119198:A:G	A	G	0.573432	0.045353
1	3177186	chr1:3177186:T:C	T	C	1.12726	0.0186349
1	3211504	chr1:3211504:G:A	G	A	-1.24857	0.0185284
1	3231589	chr1:3231589:T:C	T	C	-0.877628	0.0116659
1	3263283	chr1:3263283:C:T	C	T	-0.584528	0.0339832
1	3424195	chr1:3424195:A:G	A	G	0.603186	0.0392651
1	3464926	chr1:3464926:G:A	G	A	0.624374	0.0468882
1	3480891	chr1:3480891:G:A	G	A	-0.643547	0.0259277
1	3602179	chr1:3602179:C:T	C	T	-0.55263	0.0347008
1	3670813	chr1:3670813:C:A	C	A	-0.880538	0.0234675
1	3682950	chr1:3682950:C:T	C	T	1.36715	0.0179753
1	3689386	chr1:3689386:C:T	C	T	1.10249	0.0192749
1	3705833	chr1:3705833:G:A	G	A	1.63201	0.0425673
1	3708984	chr1:3708984:T:C	T	C	-0.725971	0.0080415
1	3721248	chr1:3721248:C:A	C	A	0.956983	0.000559772
1	3753056	chr1:3753056:T:C	T	C	-0.743131	0.00383326
1	3766785	chr1:3766785:G:A	G	A	1.45928	0.0312362
1	3803417	chr1:3803417:T:C	T	C	1.02387	0.00911048
1	3826622	chr1:3826622:C:T	C	T	-1.62006	0.0389559
1	3909147	chr1:3909147:C:T	C	T	-1.82274	0.025855
1	3919225	chr1:3919225:A:G	A	G	-1.08098	0.00145786
1	3924081	chr1:3924081:A:G	A	G	-0.628981	0.0410042
1	4040430	chr1:4040430:A:G	A	G	0.967967	0.00613918
1	4120782	chr1:4120782:C:T	C	T	0.533223	0.0498506
1	4130625	chr1:4130625:T:G	T	G	1.47749	0.0151503
1	4267804	chr1:4267804:G:A	G	A	0.733814	0.0215129
1	4292650	chr1:4292650:T:C	T	C	1.33152	0.0370934
1	4303675	chr1:4303675:C:A	C	A	-0.811746	0.00410855
1	4382482	chr1:4382482:T:C	T	C	-0.724183	0.0366514
1	4423343	chr1:4423343:T:C	T	C	-1.50062	0.0275931
1	4480983	chr1:4480983:C:A	C	A	-0.759619	0.0465418
1	4570324	chr1:4570324:A:C	A	C	-1.03806	0.00485479
1	4573547	chr1:4573547:G:A	G	A	0.689139	0.0211057
1	4612695	chr1:4612695:T:C	T	C	-1.04099	0.00873731
1	4625706	chr1:4625706:G:T	G	T	0.608704	0.0458746
1	4657331	chr1:4657331:A:G	A	G	-1.04601	0.0234925
1	4673179	chr1:4673179:T:C	T	C	-0.903999	0.0137966
1	4724329	chr1:4724329:G:A	G	A	-1.57205	0.0195715
1	4764288	chr1:4764288:T:C	T	C	0.60123	0.0259911
1	4821626	chr1:4821626:C:A	C	A	-1.33307	0.00393459
1	4846668	chr1:4846668:G:A	G	A	-0.784681	0.0267435
1	4953497	chr1:4953497:G:A	G	A	2.35297	0.031761
1	5252248	chr1:5252248:G:A	G	A	0.837669	0.0138757
1	5285371	chr1:5285371:A:G	A	G	0.746376	0.0130178
1	5287397	chr1:5287397:C:T	C	T	-0.604641	0.025815
1	5312441	chr1:5312441:C:A	C	A	-2.48871	0.0204262
1	5431441	chr1:5431441:G:A	G	A	-0.766336	0.0204001
1	5608774	chr1:5608774:G:A	G	A	-2.50162	0.0318111
1	5614374	chr1:5614374:T:C	T	C	-0.755446	0.0408583
1	5618723	chr1:5618723:A:G	A	G	-0.698318	0.00996769
1	5635873	chr1:5635873:T:C	T	C	-0.6065	0.0470601
1	5660901	chr1:5660901:C:T	C	T	-1.18383	0.0136265
1	5787667	chr1:5787667:A:G	A	G	1.48242	0.0365735
1	6085319	chr1:6085319:C:T	C	T	-1.64877	0.034722
1	6285977	chr1:6285977:G:A	G	A	-1.46924	0.0293372
1	6491632	chr1:6491632:C:T	C	T	-1.44721	0.0322097
1	6509831	chr1:6509831:C:T	C	T	-0.916363	0.0341639
1	6764774	chr1:6764774:G:T	G	T	1.93102	0.0215822
1	6861420	chr1:6861420:C:T	C	T	-0.715923	0.0187361
1	6915161	chr1:6915161:A:G	A	G	-0.826559	0.0245714
1	7065353	chr1:7065353:C:T	C	T	2.18299	0.00222479
1	7136065	chr1:7136065:A:G	A	G	0.63759	0.0428268
1	7301278	chr1:7301278:G:A	G	A	1.00409	0.00348772
1	7304994	chr1:7304994:C:T	C	T	1.94341	0.00459737
1	7412444	chr1:7412444:C:T	C	T	0.738647	0.0145136
1	7632695	chr1:7632695:T:C	T	C	-0.976225	0.0206325
1	7747334	chr1:7747334:T:C	T	C	0.901125	0.0242835
1	7857016	chr1:7857016:G:A	G	A	0.758843	0.0397128
1	8229192	chr1:8229192:T:C	T	C	1.02131	0.0254484
1	8234602	chr1:8234602:G:A	G	A	-1.10219	0.0317077
1	8329094	chr1:8329094:G:A	G	A	-0.805413	0.0347236
1	8365738	chr1:8365738:C:T	C	T	-0.847319	0.0349669
1	8435530	chr1:8435530:A:G	A	G	0.837274	0.0127193
1	8447516	chr1:8447516:C:T	C	T	1.14188	0.0452866
1	8927045	chr1:8927045:C:T	C	T	0.883081	0.0127363
1	8954864	chr1:8954864:C:T	C	T	0.707092	0.047158
1	8960846	chr1:8960846:T:C	T	C	0.642757	0.0225066
1	9005820	chr1:9005820:A:C	A	C	0.777339	0.0373731
1	9038213	chr1:9038213:C:T	C	T	0.767576	0.0215517
1	9091423	chr1:9091423:A:G	A	G	1.28827	0.0306126
1	9109660	chr1:9109660:C:T	C	T	-0.611055	0.0405817
1	9165125	chr1:9165125:G:A	G	A	0.666376	0.0257036
1	9212319	chr1:9212319:A:G	A	G	0.867603	0.00251951
1	9246974	chr1:9246974:G:A	G	A	-0.686269	0.0294255
1	9255788	chr1:9255788:C:T	C	T	0.981838	0.00235364
1	9278554	chr1:9278554:C:T	C	T	0.785875	0.029343
1	9279408	chr1:9279408:C:T	C	T	-0.804442	0.0444317
1	9362816	chr1:9362816:C:A	C	A	0.659387	0.0154622
1	9395907	chr1:9395907:A:G	A	G	-0.740082	0.0101418
1	9415750	chr1:9415750:C:T	C	T	0.778455	0.0274648
1	9453600	chr1:9453600:G:A	G	A	0.785404	0.0445682
1	9476438	chr1:9476438:C:T	C	T	-1.00466	0.0021042
1	9562123	chr1:9562123:G:A	G	A	1.30341	0.04428
1	9951465	chr1:9951465:G:T	G	T	1.77148	0.0348245
1	10215250	chr1:10215250:C:T	C	T	-1.52057	0.0271249
1	10702375	chr1:10702375:C:T	C	T	0.859941	0.0290809
1	10707845	chr1:10707845:C:T	C	T	0.621328	0.0224299
1	10784387	chr1:10784387:A:G	A	G	0.575885	0.0484844
1	10829223	chr1:10829223:G:T	G	T	-2.28321	0.0391472
1	10864216	chr1:10864216:G:A	G	A	-0.829334	0.0130195
1	11445652	chr1:11445652:G:A	G	A	0.754838	0.0120279
1	11559097	chr1:11559097:C:T	C	T	-0.838437	0.0317867
1	11565920	chr1:11565920:T:G	T	G	-1.71847	0.0376861
1	11596627	chr1:11596627:A:G	A	G	0.713903	0.0168684
1	11597626	chr1:11597626:G:A	G	A	-1.06302	0.0366675
1	11816243	chr1:11816243:T:G	T	G	1.17055	0.032439
1	11874871	chr1:11874871:T:C	T	C	2.30124	0.0466681
1	11982386	chr1:11982386:C:T	C	T	-0.577028	0.0286584
1	12121344	chr1:12121344:C:T	C	T	2.48366	0.0233615
1	12129504	chr1:12129504:G:A	G	A	-0.740139	0.0150988
1	12233940	chr1:12233940:T:C	T	C	0.765204	0.0333477
1	12534263	chr1:12534263:C:T	C	T	-0.576369	0.0414274
1	12534482	chr1:12534482:C:A	C	A	0.842094	0.0156253
1	12576007	chr1:12576007:G:T	G	T	1.06057	0.0430888
1	12588854	chr1:12588854:T:G	T	G	0.960779	0.0433005
1	12693598	chr1:12693598:C:T	C	T	0.998946	0.0167264
1	12800573	chr1:12800573:T:C	T	C	0.877218	0.00327135
1	12811795	chr1:12811795:G:A	G	A	0.544112	0.04022
1	13108991	chr1:13108991:G:A	G	A	-1.18795	0.0145123
1	13476350	chr1:13476350:T:G	T	G	-1.03046	0.00256951
1	13537137	chr1:13537137:G:A	G	A	-1.46623	0.0312534
1	13539440	chr1:13539440:C:T	C	T	2.03816	0.00964844
1	13693697	chr1:13693697:C:T	C	T	1.05595	0.0106247
1	13889708	chr1:13889708:T:C	T	C	-0.811358	0.0170152
1	13901040	chr1:13901040:T:C	T	C	-0.620752	0.0347356
1	13919242	chr1:13919242:G:A	G	A	-0.818729	0.0177667
1	14070100	chr1:14070100:C:T	C	T	-1.12787	0.014323
1	14104566	chr1:14104566:T:C	T	C	-0.91467	0.00899976
1	14246885	chr1:14246885:A:C	A	C	0.757104	0.0133232
1	14259153	chr1:14259153:G:A	G	A	0.693794	0.0314046
1	14346152	chr1:14346152:A:G	A	G	-0.98379	0.00559122
1	14354404	chr1:14354404:G:A	G	A	0.657129	0.0365764
1	14362986	chr1:14362986:G:T	G	T	1.04746	0.00293361
1	14387831	chr1:14387831:G:A	G	A	-1.05566	0.00202459
1	14621424	chr1:14621424:T:C	T	C	-0.785299	0.0385818
1	14697407	chr1:14697407:A:G	A	G	-2.10099	0.0443866
1	14774397	chr1:14774397:T:C	T	C	-1.4882	0.014599
1	14938203	chr1:14938203:A:G	A	G	-0.970024	0.0441022
1	14985097	chr1:14985097:C:T	C	T	-1.18965	0.00719336
1	14991227	chr1:14991227:G:A	G	A	0.682249	0.014868
1	15042057	chr1:15042057:A:G	A	G	-0.712488	0.0339643
1	15056437	chr1:15056437:T:C	T	C	-1.93274	0.0157086
1	15107142	chr1:15107142:A:C	A	C	-0.829989	0.0455894
1	15175210	chr1:15175210:G:T	G	T	-0.747354	0.0205651
1	15321332	chr1:15321332:C:T	C	T	-0.684474	0.0174726
1	15747999	chr1:15747999:C:T	C	T	0.771714	0.0473637
1	15798884	chr1:15798884:C:T	C	T	-0.894533	0.0127773
1	16167853	chr1:16167853:C:A	C	A	1.16875	0.0475038
1	16468706	chr1:16468706:C:T	C	T	-1.22591	0.0138685
1	17106250	chr1:17106250:G:A	G	A	-0.855466	0.0034247
1	17194779	chr1:17194779:G:A	G	A	0.859314	0.0184091
1	17254156	chr1:17254156:A:G	A	G	-1.13864	0.0123065
1	17265835	chr1:17265835:G:A	G	A	1.68757	0.0467901
1	17354929	chr1:17354929:A:G	A	G	-0.714024	0.0311304
1	17698460	chr1:17698460:G:A	G	A	-0.559337	0.046624
1	17706718	chr1:17706718:G:A	G	A	1.49941	0.0192727
1	17714465	chr1:17714465:G:A	G	A	-2.23694	0.0402533
1	17724816	chr1:17724816:G:A	G	A	-1.84571	0.0278887
1	17758612	chr1:17758612:A:G	A	G	0.749932	0.00791777
1	17782354	chr1:17782354:A:G	A	G	1.06604	0.0151876
1	17784251	chr1:17784251:A:C	A	C	0.98578	0.0323715
1	17800626	chr1:17800626:A:C	A	C	-0.951301	0.0314569
1	17833038	chr1:17833038:C:A	C	A	0.988959	0.011439
1	17938244	chr1:17938244:A:G	A	G	-0.755133	0.0404351
1	17959189	chr1:17959189:G:A	G	A	-0.662819	0.0324842
1	18004838	chr1:18004838:A:G	A	G	-0.743994	0.0256464
1	18100537	chr1:18100537:G:A	G	A	0.651534	0.0189105
1	18124926	chr1:18124926:A:G	A	G	0.697408	0.0289504
1	18252207	chr1:18252207:T:C	T	C	-0.911173	0.00910093
1	18262858	chr1:18262858:G:A	G	A	-1.33025	0.033582
1	18271315	chr1:18271315:G:A	G	A	0.639202	0.0467786
1	18372453	chr1:18372453:T:G	T	G	-0.610104	0.0412256
1	18389784	chr1:18389784:A:G	A	G	-0.69727	0.0309175
1	18508726	chr1:18508726:T:C	T	C	2.34598	0.0376691
1	18522073	chr1:18522073:T:G	T	G	-0.797296	0.0234754
1	18523560	chr1:18523560:G:A	G	A	-0.969008	0.00426931
1	18529402	chr1:18529402:C:T	C	T	-1.10022	0.0159679
1	18546627	chr1:18546627:G:A	G	A	0.85812	0.0404389
1	18603876	chr1:18603876:C:T	C	T	-1.28978	0.00213797
1	18706856	chr1:18706856:A:G	A	G	1.69896	0.047595
1	18782055	chr1:18782055:C:T	C	T	1.25871	0.0398855
1	18827735	chr1:18827735:G:A	G	A	0.758097	0.0110545
1	18850244	chr1:18850244:G:A	G	A	2.52975	0.000186049
1	18906196	chr1:18906196:A:G	A	G	1.94483e-13	0.00844982
1	18920045	chr1:18920045:G:A	G	A	-1.78134	0.025614
1	19091572	chr1:19091572:G:A	G	A	-0.802898	0.031041
1	19110691	chr1:19110691:G:T	G	T	1.01414	0.00763492
1	19692451	chr1:19692451:C:T	C	T	-1.45258	0.00804591
1	19702119	chr1:19702119:G:A	G	A	0.942143	0.0312479
1	19724366	chr1:19724366:T:C	T	C	-0.650538	0.0343224
1	19769335	chr1:19769335:C:T	C	T	1.82824	0.0105291
1	19839478	chr1:19839478:C:T	C	T	0.617245	0.0315382
1	20124788	chr1:20124788:C:T	C	T	-1.24777	0.0229238
1	20279827	chr1:20279827:G:A	G	A	-0.829595	0.0164536
1	20319881	chr1:20319881:G:A	G	A	-0.595646	0.0499171
1	20357732	chr1:20357732:C:A	C	A	1.01066	0.0468095
1	20420075	chr1:20420075:A:G	A	G	0.793716	0.035848
1	20477572	chr1:20477572:T:G	T	G	-1.2005	0.0298828
1	21404985	chr1:21404985:T:C	T	C	-1.22431	0.00786722
1	21449341	chr1:21449341:T:C	T	C	-0.840178	0.0430669
1	21565627	chr1:21565627:G:A	G	A	-0.69902	0.0275697
1	21606700	chr1:21606700:C:T	C	T	-1.97522	0.0213458
1	21864961	chr1:21864961:G:A	G	A	-0.866748	0.0298516
1	22304161	chr1:22304161:T:C	T	C	-0.845952	0.0441243
1	22356537	chr1:22356537:A:G	A	G	-1.75571	0.0253531
1	22536803	chr1:22536803:T:C	T	C	-0.883389	0.00702477
1	22539482	chr1:22539482:C:T	C	T	-1.38134	0.0432016
1	22543411	chr1:22543411:C:A	C	A	1.25009	0.0054457
1	22546194	chr1:22546194:A:C	A	C	-0.803736	0.0289782
1	22585802	chr1:22585802:C:T	C	T	-2.67069	0.0125193
1	22588266	chr1:22588266:A:G	A	G	-0.714055	0.0375242
1	22615276	chr1:22615276:G:T	G	T	0.910862	0.00579666
1	22664215	chr1:22664215:A:G	A	G	-0.858229	0.0307438
1	22735156	chr1:22735156:C:T	C	T	1.48856	0.0497027
1	22781251	chr1:22781251:C:T	C	T	-0.877417	0.031767
1	22781873	chr1:22781873:T:C	T	C	-0.654457	0.0370704
1	23465457	chr1:23465457:A:C	A	C	-1.37181	0.0235968
1	23494787	chr1:23494787:C:T	C	T	0.729235	0.0281968
1	23678023	chr1:23678023:G:A	G	A	1.3722	0.0146939
1	23716955	chr1:23716955:A:G	A	G	-1.00793	0.000832244
1	23750961	chr1:23750961:C:T	C	T	-1.0184	0.0151206
1	24035224	chr1:24035224:A:G	A	G	0.616801	0.0376597
1	24401188	chr1:24401188:C:T	C	T	-0.76689	0.0439299
1	24505153	chr1:24505153:G:A	G	A	-1.20689	0.0107477
1	24856628	chr1:24856628:G:A	G	A	1.34993	0.023322
1	24889259	chr1:24889259:T:C	T	C	0.661576	0.0284199
1	24988403	chr1:24988403:T:C	T	C	0.659434	0.0285365
1	25048166	chr1:25048166:C:T	C	T	0.724382	0.0473523
1	25105234	chr1:25105234:C:T	C	T	-1.15498	0.00384588
1	25199390	chr1:25199390:G:A	G	A	0.99525	0.0305475
1	25793826	chr1:25793826:C:T	C	T	1.03992	0.00689656
1	26021558	chr1:26021558:G:A	G	A	-1.21495	0.0329969
1	26192971	chr1:26192971:G:T	G	T	-0.883132	0.0432399
1	26254299	chr1:26254299:C:T	C	T	1.48449	0.0467536
1	26352809	chr1:26352809:C:T	C	T	1.29915	0.00544466
1	26486875	chr1:26486875:T:C	T	C	0.75771	0.0198919
1	26578169	chr1:26578169:G:A	G	A	-0.687014	0.0191356
1	26584193	chr1:26584193:C:T	C	T	-0.876588	0.0106371
1	27163467	chr1:27163467:T:C	T	C	1.18405	0.0331783
1	27375143	chr1:27375143:G:A	G	A	-1.22999	0.0420077
1	27885139	chr1:27885139:T:C	T	C	-0.691299	0.023368
1	28336933	chr1:28336933:T:C	T	C	-0.723303	0.0347876
1	28907416	chr1:28907416:T:C	T	C	0.615019	0.0498087
1	29240900	chr1:29240900:C:T	C	T	-0.89646	0.00562005
1	29284251	chr1:29284251:C:T	C	T	-0.998443	0.0491983
1	29359278	chr1:29359278:T:G	T	G	0.765203	0.0320126
1	29851615	chr1:29851615:C:T	C	T	1.34026	0.0130172
1	30193597	chr1:30193597:T:G	T	G	0.847145	0.00637217
1	30264017	chr1:30264017:C:A	C	A	-1.07941	0.00134628
1	30520313	chr1:30520313:A:G	A	G	-1.94803	0.0138027
1	30645115	chr1:30645115:C:T	C	T	1.59004	0.0317108
1	30785412	chr1:30785412:T:C	T	C	1.1572	0.0233535
1	30841338	chr1:30841338:G:A	G	A	-0.92583	0.035805
1	30844633	chr1:30844633:A:G	A	G	1.42053	0.0246327
1	30872105	chr1:30872105:C:T	C	T	-0.973438	0.00106431
1	30894539	chr1:30894539:C:T	C	T	-0.634902	0.0435426
1	33310172	chr1:33310172:G:A	G	A	-1.04958	0.0228865
1	33454671	chr1:33454671:T:C	T	C	1.4289	0.0318165
1	33586803	chr1:33586803:A:G	A	G	-0.665864	0.0476621
1	33591339	chr1:33591339:A:G	A	G	-0.704318	0.0240889
1	33623794	chr1:33623794:C:T	C	T	0.853244	0.0114749
1	33674400	chr1:33674400:G:A	G	A	1.72196	0.0318801
1	33744166	chr1:33744166:T:C	T	C	0.776756	0.0490072
1	33895700	chr1:33895700:C:T	C	T	-1.91704	0.0214828
1	33903644	chr1:33903644:C:T	C	T	0.84534	0.00711895
1	34068314	chr1:34068314:G:T	G	T	1.71434	0.0334976
1	34085002	chr1:34085002:T:G	T	G	-1.01033	0.0105283
1	34086036	chr1:34086036:G:A	G	A	0.710787	0.0221061
1	34124578	chr1:34124578:T:G	T	G	0.814483	0.0407548
1	34425980	chr1:34425980:C:A	C	A	0.599662	0.0412582
1	34497665	chr1:34497665:G:A	G	A	0.807003	0.00965415
1	34652539	chr1:34652539:C:A	C	A	0.905921	0.0428547
1	34741016	chr1:34741016:G:T	G	T	-0.760949	0.0422684
1	34801857	chr1:34801857:C:T	C	T	2.71117	0.011215
1	34926309	chr1:34926309:C:T	C	T	1.11089	0.00699432
1	35135409	chr1:35135409:A:G	A	G	1.29559	0.00403585
1	35189989	chr1:35189989:C:T	C	T	0.718448	0.0227178
1	35194687	chr1:35194687:G:A	G	A	1.62258	0.00172881
1	35442850	chr1:35442850:T:C	T	C	0.582539	0.0477455
1	35695266	chr1:35695266:G:A	G	A	0.743526	0.0137243
1	35860595	chr1:35860595:T:C	T	C	-2.19574	0.0485268
1	36098196	chr1:36098196:C:T	C	T	0.702389	0.0272727
1	36333441	chr1:36333441:G:A	G	A	-0.905489	0.0206212
1	36538845	chr1:36538845:C:T	C	T	-1.52344	0.0284061
1	36685283	chr1:36685283:A:G	A	G	0.799923	0.0170371
1	36723559	chr1:36723559:C:A	C	A	1.48953	0.0375574
1	36960792	chr1:36960792:T:C	T	C	1.18421	0.025867
1	36966579	chr1:36966579:G:A	G	A	0.779973	0.0459383
1	37107921	chr1:37107921:C:T	C	T	-1.24373	0.00464488
1	37119080	chr1:37119080:G:A	G	A	-0.848642	0.0142089
1	37151114	chr1:37151114:G:A	G	A	-2.30098	0.00338971
1	37197675	chr1:37197675:C:T	C	T	-1.10483	0.0375012
1	37317273	chr1:37317273:A:G	A	G	1.27647	0.0248051
1	37401449	chr1:37401449:G:A	G	A	1.14478	0.00931545
1	37436730	chr1:37436730:G:A	G	A	0.675768	0.023794
1	37458799	chr1:37458799:C:A	C	A	0.702039	0.0201085
1	37486153	chr1:37486153:T:C	T	C	-1.06209	0.00076127
1	37656612	chr1:37656612:T:C	T	C	0.708507	0.0246357
1	37726526	chr1:37726526:A:G	A	G	-0.922096	0.00945473
1	37783821	chr1:37783821:G:A	G	A	0.711069	0.0165346
1	37987083	chr1:37987083:A:G	A	G	-1.1633	0.00290527
1	38096626	chr1:38096626:C:T	C	T	-1.64328	0.0157066
1	38140783	chr1:38140783:T:C	T	C	0.904452	0.0425493
1	38265659	chr1:38265659:T:G	T	G	1.21343	0.0249814
1	38312070	chr1:38312070:A:G	A	G	-1.38099	0.0224418
1	38418857	chr1:38418857:G:A	G	A	-0.820115	0.0393666
1	38534434	chr1:38534434:A:C	A	C	1.15362	0.00504475
1	38568250	chr1:38568250:G:A	G	A	-0.73909	0.036014
1	38583003	chr1:38583003:A:G	A	G	-1.30968	0.0451804
1	38748190	chr1:38748190:C:A	C	A	-1.31091	0.00675178
1	38944140	chr1:38944140:G:A	G	A	-0.960044	0.0447755
1	39077585	chr1:39077585:G:A	G	A	-1.29573	0.0380174
1	39085570	chr1:39085570:G:A	G	A	0.913464	0.0247541
1	39337767	chr1:39337767:G:T	G	T	-1.581	0.0294309
1	39535604	chr1:39535604:A:G	A	G	-0.651044	0.0354551
1	39952917	chr1:39952917:A:G	A	G	1.03141	0.0098097
1	39981381	chr1:39981381:C:T	C	T	1.76495	0.0192568
1	40014082	chr1:40014082:G:T	G	T	1.10922	0.00394651
1	40270145	chr1:40270145:T:G	T	G	0.857357	0.0247743
1	40299629	chr1:40299629:T:C	T	C	1.98466	0.0239543
1	40304753	chr1:40304753:G:A	G	A	1.41691	0.00380496
1	40331726	chr1:40331726:C:T	C	T	0.821568	0.0291611
1	40397159	chr1:40397159:G:A	G	A	-1.4622	0.00195084
1	40790541	chr1:40790541:A:G	A	G	-2.24811	0.0452914
1	40807233	chr1:40807233:A:C	A	C	0.902709	0.00578175
1	40816897	chr1:40816897:C:T	C	T	1.32273	0.0414204
1	40821211	chr1:40821211:A:G	A	G	-1.06724	0.00197177
1	40824563	chr1:40824563:C:T	C	T	0.678792	0.0440089
1	40830340	chr1:40830340:A:G	A	G	1.49117	0.0189418
1	40889009	chr1:40889009:C:T	C	T	1.18469	0.000666861
1	40899773	chr1:40899773:G:T	G	T	-1.75938	0.00324242
1	40917722	chr1:40917722:C:T	C	T	-2.61115	0.0190669
1	40924503	chr1:40924503:A:G	A	G	-0.820349	0.0105556
1	41355898	chr1:41355898:G:A	G	A	1.11392	0.0391104
1	41365375	chr1:41365375:T:C	T	C	-0.736415	0.044761
1	41390399	chr1:41390399:A:C	A	C	0.855291	0.0489893
1	41403066	chr1:41403066:G:A	G	A	-1.25744	0.0102483
1	41416729	chr1:41416729:C:T	C	T	0.990883	0.0152432
1	41510346	chr1:41510346:C:T	C	T	0.694573	0.0455879
1	42167593	chr1:42167593:A:C	A	C	-1.22292	0.0458128
1	42367710	chr1:42367710:T:C	T	C	0.749766	0.0182792
1	42401179	chr1:42401179:A:C	A	C	-0.859137	0.012229
1	42620018	chr1:42620018:T:C	T	C	-2.24807	0.0397929
1	42680537	chr1:42680537:A:G	A	G	-0.806991	0.0130737
1	42733444	chr1:42733444:A:G	A	G	-1.27681	0.0434667
1	42768751	chr1:42768751:G:A	G	A	-0.690427	0.0340157
1	42970380	chr1:42970380:G:A	G	A	0.905094	0.0100243
1	43048650	chr1:43048650:G:A	G	A	-1.69936	0.00570925
1	43108708	chr1:43108708:G:A	G	A	0.639749	0.0489852
1	43287153	chr1:43287153:C:T	C	T	0.765821	0.0440229
1	43596483	chr1:43596483:C:T	C	T	-1.99648	0.00126196
1	43623961	chr1:43623961:A:G	A	G	-0.893849	0.00749026
1	43974474	chr1:43974474:G:A	G	A	-0.743631	0.0258043
1	43996150	chr1:43996150:C:T	C	T	-2.22131	0.0373991
1	44037237	chr1:44037237:T:C	T	C	1.02858	0.0158792
1	44090042	chr1:44090042:C:T	C	T	0.812936	0.0120884
1	44092136	chr1:44092136:G:A	G	A	1.28745	0.00176543
1	44121840	chr1:44121840:C:T	C	T	-0.925577	0.01179
1	44123166	chr1:44123166:T:C	T	C	1.87998	0.0289173
1	44142359	chr1:44142359:A:G	A	G	1.88	0.0285552
1	44302467	chr1:44302467:G:A	G	A	-1.08986	0.0328201
1	44452660	chr1:44452660:G:A	G	A	0.891352	0.00911859
1	44533229	chr1:44533229:G:A	G	A	-1.09273	0.0339649
1	44594157	chr1:44594157:C:T	C	T	1.20315	0.0464724
1	44617685	chr1:44617685:T:C	T	C	0.621098	0.0418745
1	44665729	chr1:44665729:T:C	T	C	0.701845	0.029932
1	44706585	chr1:44706585:T:C	T	C	1.09938	0.012478
1	44714453	chr1:44714453:T:C	T	C	1.0927	0.00733983
1	44863255	chr1:44863255:G:A	G	A	1.11383	0.0318163
1	45280091	chr1:45280091:T:C	T	C	1.09797	0.019191
1	45301250	chr1:45301250:C:T	C	T	1.95778	0.0210251
1	46427139	chr1:46427139:C:T	C	T	0.662088	0.0413209
1	46463118	chr1:46463118:C:T	C	T	1.24809	0.0145018
1	46507286	chr1:46507286:A:G	A	G	0.905313	0.0341932
1	47185822	chr1:47185822:C:A	C	A	-1.19655	0.0094582
1	47191469	chr1:47191469:C:A	C	A	-0.910571	0.00688114
1	47195149	chr1:47195149:T:C	T	C	0.862604	0.02988
1	47267630	chr1:47267630:G:A	G	A	-0.826342	0.0481781
1	47299717	chr1:47299717:T:C	T	C	1.06082	0.00201194
1	47391589	chr1:47391589:G:A	G	A	-1.90471	0.0183238
1	47508709	chr1:47508709:C:T	C	T	-1.07048	0.00226514
1	47538005	chr1:47538005:C:T	C	T	1.02931	0.0393002
1	47544765	chr1:47544765:T:C	T	C	1.06287	0.0339752
1	47557910	chr1:47557910:A:G	A	G	-1.2432	0.0191362
1	47627760	chr1:47627760:G:T	G	T	0.680482	0.0450741
1	47632079	chr1:47632079:C:T	C	T	-1.62221	0.0495222
1	47650074	chr1:47650074:C:T	C	T	0.735325	0.023905
1	47704850	chr1:47704850:C:A	C	A	-1.02009	0.00691859
1	47747969	chr1:47747969:T:C	T	C	0.808731	0.0156916
1	47752769	chr1:47752769:T:C	T	C	-0.743199	0.0269623
1	47756378	chr1:47756378:C:A	C	A	0.926773	0.00489253
1	47774333	chr1:47774333:T:C	T	C	-1.40807	0.00170799
1	47795582	chr1:47795582:G:A	G	A	-1.00142	0.00816559
1	47830038	chr1:47830038:G:A	G	A	-1.14213	0.0012426
1	47907084	chr1:47907084:T:G	T	G	1.11766	0.00688591
1	47935631	chr1:47935631:T:G	T	G	-1.51661	0.0279705
1	48083560	chr1:48083560:A:G	A	G	1.40558	0.044055
1	48429373	chr1:48429373:T:C	T	C	-1.2855	0.0206039
1	48527663	chr1:48527663:T:G	T	G	-1.01519	0.00788772
1	48769414	chr1:48769414:G:T	G	T	0.959268	0.0152343
1	49095735	chr1:49095735:C:T	C	T	0.96698	0.02724
1	49122792	chr1:49122792:G:A	G	A	0.82885	0.0330532
1	49375198	chr1:49375198:T:C	T	C	0.817869	0.0469475
1	49653556	chr1:49653556:G:A	G	A	1.0739	0.0130578
1	50206861	chr1:50206861:T:C	T	C	0.938372	0.0368771
1	50395949	chr1:50395949:C:T	C	T	1.52782	0.0272044
1	52717150	chr1:52717150:G:A	G	A	-1.15252	0.0297755
1	53120339	chr1:53120339:G:A	G	A	-0.800031	0.025775
1	53124129	chr1:53124129:A:G	A	G	0.981858	0.0463831
1	53163239	chr1:53163239:T:C	T	C	-0.693848	0.0477603
1	53168934	chr1:53168934:G:A	G	A	-1.02343	0.00648506
1	53169720	chr1:53169720:T:C	T	C	1.98194	0.0182259
1	53305971	chr1:53305971:G:A	G	A	0.845294	0.0461492
1	53429526	chr1:53429526:A:C	A	C	-1.63194	0.0452601
1	53519770	chr1:53519770:A:C	A	C	0.837028	0.0183852
1	53701117	chr1:53701117:G:A	G	A	0.993648	0.0394002
1	53719716	chr1:53719716:C:T	C	T	1.00433	0.0364756
1	53904633	chr1:53904633:G:A	G	A	0.952682	0.00583054
1	53921337	chr1:53921337:T:C	T	C	1.81824	0.0367075
1	54291728	chr1:54291728:T:C	T	C	2.5296	0.0207515
1	54301143	chr1:54301143:C:T	C	T	0.802438	0.0282162
1	54328041	chr1:54328041:T:C	T	C	-0.850246	0.0341646
1	54352426	chr1:54352426:T:C	T	C	0.951259	0.0103466
1	54554125	chr1:54554125:G:A	G	A	-0.935935	0.028313
1	54624249	chr1:54624249:G:A	G	A	-1.30119	0.0393576
1	54634286	chr1:54634286:C:A	C	A	0.905522	0.0217183
1	54656062	chr1:54656062:T:G	T	G	1.93152	0.0218679
1	54659790	chr1:54659790:A:G	A	G	2.19816	0.00739405
1	54702411	chr1:54702411:C:T	C	T	-0.876007	0.00872734
1	54774467	chr1:54774467:G:A	G	A	-0.822273	0.0459483
1	54785779	chr1:54785779:C:T	C	T	-0.926586	0.0232701
1	55038977	chr1:55038977:G:A	G	A	-0.889341	0.033606
1	55052643	chr1:55052643:C:T	C	T	-0.813574	0.0150576
1	55570279	chr1:55570279:T:C	T	C	-0.749208	0.022378
1	55607893	chr1:55607893:T:C	T	C	0.975882	0.014733
1	55815332	chr1:55815332:T:C	T	C	2.62197	0.0175608
1	56332125	chr1:56332125:A:G	A	G	0.724293	0.0293827
1	56355704	chr1:56355704:T:C	T	C	-1.04033	0.0036632
1	56371639	chr1:56371639:C:T	C	T	-1.26256	0.0421341
1	56382809	chr1:56382809:A:G	A	G	0.983766	0.0484565
1	56416091	chr1:56416091:A:G	A	G	-0.860607	0.0316613
1	56470008	chr1:56470008:A:G	A	G	1.01324	0.0228844
1	56651236	chr1:56651236:G:A	G	A	0.977251	0.0292176
1	56715709	chr1:56715709:A:G	A	G	0.969591	0.0420069
1	56732369	chr1:56732369:T:C	T	C	0.747966	0.0443599
1	56741843	chr1:56741843:C:A	C	A	0.851214	0.0412547
1	56785401	chr1:56785401:C:T	C	T	0.756897	0.0349641
1	56908861	chr1:56908861:A:G	A	G	1.25869	0.049569
1	56922145	chr1:56922145:T:C	T	C	-0.94676	0.0318535
1	57313549	chr1:57313549:G:A	G	A	1.45561	0.00705969
1	57383605	chr1:57383605:A:C	A	C	-1.30878	0.00916113
1	57677781	chr1:57677781:A:G	A	G	-0.628604	0.0296722
1	57726451	chr1:57726451:A:C	A	C	-1.51967	0.0215824
1	57791237	chr1:57791237:T:G	T	G	-1.05237	0.020534
1	57905616	chr1:57905616:A:G	A	G	0.815542	0.00844819
1	57928969	chr1:57928969:G:T	G	T	0.763473	0.0273786
1	58070745	chr1:58070745:A:G	A	G	1.1165	0.0463945
1	58467786	chr1:58467786:G:A	G	A	1.53452	0.0312632
1	58618467	chr1:58618467:A:G	A	G	-0.776798	0.0475524
1	58695070	chr1:58695070:A:C	A	C	1.641	0.0111378
1	58784780	chr1:58784780:A:G	A	G	-0.745902	0.0461813
1	58882856	chr1:58882856:G:A	G	A	-0.868337	0.0190465
1	59085535	chr1:59085535:A:C	A	C	-0.694698	0.0429349
1	59093840	chr1:59093840:A:G	A	G	0.617581	0.0380536
1	59114917	chr1:59114917:G:T	G	T	1.08149	0.0262437
1	59153521	chr1:59153521:C:T	C	T	-0.913727	0.0377992
1	59157498	chr1:59157498:G:A	G	A	-2.30563	0.0342668
1	59257200	chr1:59257200:A:C	A	C	1.98363	0.0187071
1	59278694	chr1:59278694:G:A	G	A	1.96014	0.0164241
1	59346621	chr1:59346621:A:G	A	G	0.977935	0.0471422
1	59425618	chr1:59425618:T:C	T	C	0.627685	0.0382006
1	59705602	chr1:59705602:G:A	G	A	1.22031	0.0294197
1	59940165	chr1:59940165:C:T	C	T	1.20847	0.00219272
1	60115411	chr1:60115411:T:C	T	C	-0.821137	0.00970674
1	60135791	chr1:60135791:T:C	T	C	-1.42969	0.00543952
1	60224958	chr1:60224958:C:T	C	T	1.17972	0.0289922
1	60496496	chr1:60496496:A:G	A	G	-0.872639	0.0164928
1	60683681	chr1:60683681:G:T	G	T	-0.713592	0.0330984
1	60891167	chr1:60891167:G:A	G	A	-0.676108	0.0415452
1	60944658	chr1:60944658:T:C	T	C	1.23501	0.0381885
1	60989496	chr1:60989496:A:G	A	G	1.28155	0.000476783
1	61006564	chr1:61006564:G:A	G	A	-0.983397	0.0025915
1	61019896	chr1:61019896:A:C	A	C	-0.797307	0.030154
1	61158455	chr1:61158455:A:C	A	C	2.29287	0.0497704
1	61195677	chr1:61195677:G:T	G	T	-0.85907	0.0113822
1	61213207	chr1:61213207:G:A	G	A	0.733851	0.0239837
1	61215279	chr1:61215279:A:C	A	C	-1.33887	0.00986589
1	61252210	chr1:61252210:C:T	C	T	-0.826618	0.0322786
1	61385704	chr1:61385704:A:G	A	G	-1.57782	0.0218944
1	61398559	chr1:61398559:C:A	C	A	-1.20317	0.00216789
1	61445679	chr1:61445679:T:C	T	C	-0.949413	0.0272615
1	61518688	chr1:61518688:G:A	G	A	-0.688998	0.0237763
1	61559366	chr1:61559366:G:A	G	A	1.05573	0.000505229
1	61566997	chr1:61566997:T:G	T	G	-1.43674	0.0338288
1	61610220	chr1:61610220:A:G	A	G	-0.60502	0.0405732
1	61659818	chr1:61659818:G:A	G	A	-0.736811	0.0412538
1	61776394	chr1:61776394:A:C	A	C	0.82812	0.0298935
1	61914551	chr1:61914551:G:T	G	T	-0.926594	0.00872033
1	61916945	chr1:61916945:A:C	A	C	-1.11562	0.00663347
1	62002634	chr1:62002634:G:A	G	A	2.18739	0.00176041
1	62198561	chr1:62198561:T:G	T	G	2.37945	0.0371084
1	62203571	chr1:62203571:C:T	C	T	-1.03305	0.0206988
1	62209186	chr1:62209186:C:T	C	T	-0.663438	0.0359219
1	62317845	chr1:62317845:A:C	A	C	-0.664638	0.0406397
1	62435140	chr1:62435140:A:G	A	G	-0.628984	0.0445052
1	62797335	chr1:62797335:C:T	C	T	0.827411	0.0362965
1	63062906	chr1:63062906:T:C	T	C	-1.19981	0.0376339
1	63174504	chr1:63174504:C:T	C	T	1.58636	0.00168145
1	63300965	chr1:63300965:T:C	T	C	1.2414	0.0085901
1	63314456	chr1:63314456:C:T	C	T	0.706816	0.0310431
1	63337052	chr1:63337052:T:C	T	C	1.29757	0.0380569
1	63342214	chr1:63342214:G:T	G	T	-0.665026	0.0366169
1	63352722	chr1:63352722:C:T	C	T	0.895517	0.0140786
1	63567377	chr1:63567377:C:T	C	T	-0.798366	0.0416937
1	63627367	chr1:63627367:G:A	G	A	-1.21028	0.0482011
1	63734394	chr1:63734394:T:G	T	G	0.751729	0.0382321
1	63907556	chr1:63907556:G:T	G	T	2.20568	0.043602
1	64180941	chr1:64180941:A:G	A	G	1.25585	0.00157191
1	64233302	chr1:64233302:C:T	C	T	-0.76752	0.0352395
1	64281953	chr1:64281953:G:A	G	A	1.30336	0.00190047
1	64475926	chr1:64475926:C:T	C	T	-0.818898	0.034801
1	64704722	chr1:64704722:T:C	T	C	0.924663	0.0236791
1	65033551	chr1:65033551:C:T	C	T	1.30118	0.00629513
1	65066068	chr1:65066068:A:G	A	G	1.0551	0.0115558
1	65114996	chr1:65114996:T:C	T	C	0.835536	0.0134393
1	65142906	chr1:65142906:G:A	G	A	1.87878	0.0239883
1	65335600	chr1:65335600:G:A	G	A	-1.68704	0.0063217
1	65369880	chr1:65369880:G:A	G	A	0.987983	0.0388597
1	65407484	chr1:65407484:A:G	A	G	0.714296	0.0375491
1	65448549	chr1:65448549:G:T	G	T	-1.1173	0.025627
1	65468671	chr1:65468671:T:C	T	C	-0.889433	0.0156194
1	65470498	chr1:65470498:G:A	G	A	0.899254	0.013779
1	65769462	chr1:65769462:C:T	C	T	-1.8509	0.0227923
1	65843042	chr1:65843042:A:G	A	G	2.64154	0.0147321
1	65854085	chr1:65854085:G:A	G	A	-2.31404	0.0043963
1	65883228	chr1:65883228:T:C	T	C	-1.0557	0.0234066
1	66187275	chr1:66187275:A:G	A	G	0.825399	0.0430112
1	66292292	chr1:66292292:A:G	A	G	-0.857229	0.0188955
1	66391341	chr1:66391341:A:C	A	C	0.950517	0.0149233
1	66440913	chr1:66440913:C:A	C	A	0.677685	0.0313765
1	66454210	chr1:66454210:C:T	C	T	0.751012	0.0446059
1	66493751	chr1:66493751:C:T	C	T	-0.826391	0.0188388
1	66534420	chr1:66534420:A:G	A	G	-1.25362	0.0133521
1	66776888	chr1:66776888:G:A	G	A	0.673148	0.0428933
1	66789863	chr1:66789863:A:G	A	G	-1.07325	0.0167604
1	67455491	chr1:67455491:C:T	C	T	-0.67655	0.0334271
1	67503042	chr1:67503042:A:C	A	C	-0.766303	0.0403128
1	67527030	chr1:67527030:T:C	T	C	-2.48318	0.0273596
1	67767951	chr1:67767951:G:A	G	A	0.843611	0.021017
1	67869941	chr1:67869941:G:A	G	A	0.976122	0.0063059
1	67962566	chr1:67962566:A:G	A	G	1.52857	0.0305699
1	68101765	chr1:68101765:G:A	G	A	-0.800568	0.0349533
1	68162009	chr1:68162009:G:T	G	T	0.87093	0.0466002
1	68470836	chr1:68470836:C:A	C	A	-1.44916	0.0127393
1	68981932	chr1:68981932:G:A	G	A	0.666833	0.044461
1	69062446	chr1:69062446:A:C	A	C	0.715078	0.0299164
1	69195251	chr1:69195251:A:C	A	C	1.37953	0.0390679
1	69270326	chr1:69270326:A:G	A	G	0.766849	0.0409658
1	69488421	chr1:69488421:G:A	G	A	-1.4712	0.0457774
1	69558218	chr1:69558218:A:G	A	G	1.73771	0.0413349
1	69724299	chr1:69724299:A:G	A	G	0.810372	0.0335795
1	69803828	chr1:69803828:A:C	A	C	-1.23541	0.0213566
1	70033185	chr1:70033185:G:A	G	A	-1.44679	0.0153667
1	70452206	chr1:70452206:A:G	A	G	1.44948	0.0248745
1	70501449	chr1:70501449:C:A	C	A	-0.792009	0.044062
1	70592056	chr1:70592056:G:A	G	A	1.11872	0.0135262
1	70972093	chr1:70972093:C:T	C	T	0.863882	0.0173719
1	71019731	chr1:71019731:C:T	C	T	-1.0986	0.02243
1	71304013	chr1:71304013:G:A	G	A	-1.08112	0.0403989
1	71567930	chr1:71567930:C:T	C	T	1.0803	0.00726598
1	71825854	chr1:71825854:G:A	G	A	0.894245	0.0141796
1	72044000	chr1:72044000:C:T	C	T	-1.16027	0.0306568
1	72245030	chr1:72245030:C:T	C	T	-1.16367	0.0233257
1	73909546	chr1:73909546:G:T	G	T	-1.41067	0.0262173
1	73933077	chr1:73933077:C:T	C	T	2.38137	0.0051312
1	73979371	chr1:73979371:A:C	A	C	-1.33345	0.000424417
1	74186951	chr1:74186951:G:A	G	A	0.834307	0.0375997
1	74245020	chr1:74245020:C:A	C	A	1.37889	0.0497231
1	74550987	chr1:74550987:A:G	A	G	-1.38881	0.0278926
1	74671296	chr1:74671296:T:G	T	G	-0.698049	0.0436176
1	74695444	chr1:74695444:T:C	T	C	1.01179	0.0103973
1	74733056	chr1:74733056:A:C	A	C	-0.938702	0.0289813
1	74986424	chr1:74986424:C:T	C	T	0.728451	0.0416322
1	75034575	chr1:75034575:A:G	A	G	0.92134	0.00975734
1	75313173	chr1:75313173:C:T	C	T	-0.82559	0.0148
1	75353145	chr1:75353145:T:C	T	C	-0.991399	0.00665654
1	75361165	chr1:75361165:A:G	A	G	1.1497	0.00102473
1	75506137	chr1:75506137:T:C	T	C	-1.15162	0.000873949
1	75625742	chr1:75625742:G:A	G	A	0.699483	0.0201253
1	75992608	chr1:75992608:G:A	G	A	0.712675	0.0434498
1	76010563	chr1:76010563:T:G	T	G	-0.70728	0.0318092
1	76227682	chr1:76227682:C:T	C	T	1.79977	0.00872029
1	76236358	chr1:76236358:C:T	C	T	0.876363	0.0406227
1	76285933	chr1:76285933:C:T	C	T	-0.827185	0.0249836
1	76311582	chr1:76311582:C:T	C	T	0.826835	0.0174709
1	76462439	chr1:76462439:G:A	G	A	0.912473	0.0073229
1	76471664	chr1:76471664:G:A	G	A	1.18439	0.0195524
1	76511508	chr1:76511508:G:A	G	A	0.972541	0.0195612
1	76574047	chr1:76574047:A:G	A	G	1.10179	0.0381528
1	76574503	chr1:76574503:G:A	G	A	0.926215	0.0079681
1	76609906	chr1:76609906:C:T	C	T	1.01386	0.00625997
1	76611576	chr1:76611576:T:G	T	G	-1.44713	0.0287674
1	76762077	chr1:76762077:T:C	T	C	1.14499	0.0162686
1	76848269	chr1:76848269:A:G	A	G	-1.10894	0.00261944
1	76848421	chr1:76848421:T:C	T	C	-0.997842	0.0445087
1	77005463	chr1:77005463:G:A	G	A	1.15089	0.0408534
1	77110503	chr1:77110503:C:A	C	A	0.737172	0.0394063
1	77263035	chr1:77263035:T:C	T	C	0.785254	0.0415281
1	77408951	chr1:77408951:T:C	T	C	-0.707932	0.0281794
1	77567927	chr1:77567927:C:T	C	T	1.3123	0.0176106
1	77653654	chr1:77653654:G:A	G	A	2.46285	0.0279299
1	77888900	chr1:77888900:G:T	G	T	1.13367	0.0277267
1	78247300	chr1:78247300:G:A	G	A	1.16566	0.0118568
1	78355813	chr1:78355813:C:T	C	T	0.652183	0.03013
1	78433768	chr1:78433768:C:A	C	A	-0.965961	0.0112843
1	78470726	chr1:78470726:C:T	C	T	1.12816	0.00141384
1	78534111	chr1:78534111:T:C	T	C	1.52774	0.000927797
1	78547421	chr1:78547421:T:C	T	C	-0.640201	0.0390129
1	78599536	chr1:78599536:G:A	G	A	0.724692	0.0329181
1	78657409	chr1:78657409:G:A	G	A	-1.02209	0.00653413
1	78710237	chr1:78710237:A:G	A	G	1.11774	0.0438976
1	78800934	chr1:78800934:G:A	G	A	1.32089	0.00674073
1	78844238	chr1:78844238:G:A	G	A	-0.836546	0.0358827
1	79051086	chr1:79051086:T:C	T	C	0.794678	0.0359834
1	79063630	chr1:79063630:C:T	C	T	-2.3595	0.0446049
1	79137623	chr1:79137623:C:T	C	T	-1.69863	0.0403501
1	79430502	chr1:79430502:A:G	A	G	0.869433	0.00724831
1	79472906	chr1:79472906:T:C	T	C	0.739869	0.0221237
1	79768861	chr1:79768861:G:A	G	A	-1.21636	0.00876137
1	79817572	chr1:79817572:T:C	T	C	-0.817051	0.0386382
1	80024779	chr1:80024779:C:T	C	T	-0.806236	0.0152811
1	80248361	chr1:80248361:C:T	C	T	1.09795	0.022089
1	80309536	chr1:80309536:G:A	G	A	-0.978198	0.00327659
1	80689665	chr1:80689665:G:A	G	A	1.69019	0.047412
1	80808638	chr1:80808638:A:G	A	G	-1.82988	0.0214479
1	80893271	chr1:80893271:C:A	C	A	-0.8763	0.0137288
1	80899091	chr1:80899091:C:T	C	T	-0.900603	0.0205688
1	81213325	chr1:81213325:C:T	C	T	0.884079	0.0134289
1	81241551	chr1:81241551:T:C	T	C	1.43308	0.00647629
1	81292042	chr1:81292042:A:C	A	C	1.03427	0.0492027
1	81356667	chr1:81356667:T:C	T	C	1.29079	0.00593406
1	81387642	chr1:81387642:T:C	T	C	0.96757	0.0084559
1	81454591	chr1:81454591:C:T	C	T	-0.767538	0.0214132
1	81525772	chr1:81525772:G:A	G	A	1.04632	0.0261097
1	81544761	chr1:81544761:A:G	A	G	-0.816012	0.0229478
1	81613121	chr1:81613121:A:C	A	C	-1.12641	0.0368148
1	81798632	chr1:81798632:T:G	T	G	-1.27327	0.025956
1	82055946	chr1:82055946:G:A	G	A	-1.54672	0.027711
1	82417556	chr1:82417556:C:T	C	T	-0.87824	0.0164353
1	82497579	chr1:82497579:G:A	G	A	0.984338	0.0171089
1	82498877	chr1:82498877:A:G	A	G	-1.05017	0.00136983
1	82515551	chr1:82515551:A:G	A	G	-0.856702	0.00677767
1	82592472	chr1:82592472:C:T	C	T	-2.13029	0.0130296
1	82600950	chr1:82600950:A:C	A	C	1.01377	0.012384
1	82665228	chr1:82665228:G:T	G	T	-1.13414	0.0345111
1	82962125	chr1:82962125:T:G	T	G	-0.816611	0.0293697
1	83045423	chr1:83045423:A:G	A	G	-0.766566	0.0390165
1	83372667	chr1:83372667:T:C	T	C	-1.59835	0.0270474
1	83411723	chr1:83411723:C:T	C	T	-1.3985	0.00926627
1	83426786	chr1:83426786:A:G	A	G	-0.733186	0.0174057
1	83478467	chr1:83478467:G:A	G	A	-1.2857	0.00140886
1	83558376	chr1:83558376:C:T	C	T	0.985313	0.0118163
1	83627769	chr1:83627769:A:G	A	G	-1.08353	0.00722232
1	83646363	chr1:83646363:G:T	G	T	-0.618369	0.0496761
1	83765410	chr1:83765410:A:G	A	G	1.48958	0.000351621
1	83811731	chr1:83811731:C:T	C	T	-1.10282	0.00993621
1	83963281	chr1:83963281:A:G	A	G	1.13618	0.0259783
1	84273263	chr1:84273263:T:C	T	C	-1.46828	0.0180386
1	84453852	chr1:84453852:C:T	C	T	1.06113	0.008342
1	84601877	chr1:84601877:G:A	G	A	1.49681	0.0160428
1	84819690	chr1:84819690:C:T	C	T	-0.728831	0.0318788
1	84845149	chr1:84845149:G:A	G	A	-0.907037	0.00746389
1	84884637	chr1:84884637:T:C	T	C	0.791371	0.0193971
1	84913524	chr1:84913524:A:G	A	G	0.77744	0.0352209
1	85546248	chr1:85546248:G:A	G	A	1.62099	0.019517
1	85565818	chr1:85565818:C:T	C	T	0.826414	0.0334169
1	85606533	chr1:85606533:G:A	G	A	-0.813864	0.00673764
1	86000711	chr1:86000711:G:A	G	A	0.996662	0.0494383
1	86093526	chr1:86093526:C:T	C	T	-0.846548	0.0327997
1	86250733	chr1:86250733:T:C	T	C	0.747577	0.041945
1	86294972	chr1:86294972:A:G	A	G	1.29525	0.0158193
1	87178264	chr1:87178264:C:T	C	T	0.61288	0.0278419
1	87274469	chr1:87274469:A:C	A	C	-1.62083	0.000254206
1	87335548	chr1:87335548:C:A	C	A	1.04708	0.0322922
1	87337292	chr1:87337292:A:G	A	G	-1.40976	0.0302759
1	87584432	chr1:87584432:T:C	T	C	2.54837	0.0192755
1	87586365	chr1:87586365:G:A	G	A	-0.767947	0.0428869
1	87624312	chr1:87624312:A:G	A	G	0.82001	0.0433184
1	87663910	chr1:87663910:T:C	T	C	-1.59981	0.0118101
1	87951075	chr1:87951075:T:G	T	G	1.3302	0.00409395
1	88038141	chr1:88038141:T:G	T	G	1.64245	0.048161
1	88306546	chr1:88306546:T:C	T	C	-0.987106	0.0462891
1	88401502	chr1:88401502:G:A	G	A	0.903905	0.0293859
1	88494518	chr1:88494518:T:C	T	C	-0.983177	0.00457638
1	88567467	chr1:88567467:G:A	G	A	1.1099	0.000763788
1	88896616	chr1:88896616:T:C	T	C	-0.989929	0.00263547
1	88911286	chr1:88911286:T:C	T	C	-0.670908	0.0364668
1	89099202	chr1:89099202:G:A	G	A	-1.20419	0.0308771
1	89299684	chr1:89299684:C:T	C	T	0.946083	0.0432898
1	89338199	chr1:89338199:A:G	A	G	-0.631269	0.0353031
1	89472766	chr1:89472766:T:C	T	C	-1.15073	0.0014457
1	89504604	chr1:89504604:T:C	T	C	0.842898	0.016326
1	89627456	chr1:89627456:T:C	T	C	-0.864579	0.028259
1	89826424	chr1:89826424:A:G	A	G	-0.724823	0.0192389
1	89837266	chr1:89837266:A:G	A	G	-1.20007	0.0145561
1	89838125	chr1:89838125:C:T	C	T	-0.789949	0.0193764
1	89842542	chr1:89842542:A:C	A	C	-0.803943	0.0128286
1	89852474	chr1:89852474:G:A	G	A	-0.916957	0.0169254
1	89872570	chr1:89872570:C:T	C	T	-0.633926	0.039127
1	90031419	chr1:90031419:C:T	C	T	-0.757722	0.0375126
1	90182437	chr1:90182437:G:T	G	T	0.943644	0.00378914
1	90195290	chr1:90195290:A:G	A	G	0.761127	0.0290358
1	90385503	chr1:90385503:A:G	A	G	0.938665	0.0115614
1	90636164	chr1:90636164:C:T	C	T	-1.26904	0.0401898
1	91054275	chr1:91054275:G:A	G	A	1.54026	0.0118151
1	91059983	chr1:91059983:T:G	T	G	0.783785	0.0328888
1	91062988	chr1:91062988:G:T	G	T	2.55765	0.0217005
1	91092500	chr1:91092500:G:A	G	A	0.621893	0.0493509
1	91113824	chr1:91113824:T:C	T	C	-0.693043	0.0259539
1	91115793	chr1:91115793:A:C	A	C	0.818138	0.0352923
1	91405069	chr1:91405069:C:T	C	T	-2.08494	0.00979133
1	91421083	chr1:91421083:A:C	A	C	0.870471	0.004896
1	91575945	chr1:91575945:A:G	A	G	0.632001	0.0333342
1	91588574	chr1:91588574:A:G	A	G	0.591425	0.048823
1	91655718	chr1:91655718:A:G	A	G	-1.13016	0.00184842
1	91735077	chr1:91735077:C:T	C	T	0.852246	0.0269509
1	91740661	chr1:91740661:G:A	G	A	-0.938275	0.00628229
1	91797788	chr1:91797788:A:C	A	C	1.23468	0.0212804
1	92525381	chr1:92525381:T:C	T	C	-0.995956	0.0256248
1	92805775	chr1:92805775:G:A	G	A	1.05239	0.0163635
1	93049137	chr1:93049137:G:A	G	A	-0.617144	0.0368721
1	93719113	chr1:93719113:G:A	G	A	-0.649685	0.0420409
1	94007258	chr1:94007258:G:A	G	A	-1.26217	0.0384154
1	94038989	chr1:94038989:C:T	C	T	-0.605911	0.0413768
1	94047337	chr1:94047337:C:T	C	T	0.744007	0.0225112
1	94083527	chr1:94083527:T:C	T	C	1.03511	0.0140485
1	94092554	chr1:94092554:G:T	G	T	0.651903	0.0486497
1	94095933	chr1:94095933:A:G	A	G	-0.664786	0.0343178
1	94105779	chr1:94105779:T:C	T	C	1.0617	0.000865285
1	94111337	chr1:94111337:G:A	G	A	-1.09247	0.0046801
1	94115445	chr1:94115445:C:A	C	A	-1.06349	0.0174564
1	94119775	chr1:94119775:T:C	T	C	0.7906	0.0397525
1	94323066	chr1:94323066:C:A	C	A	-1.00739	0.00839797
1	94424862	chr1:94424862:G:T	G	T	0.881181	0.031404
1	94608899	chr1:94608899:G:A	G	A	0.712421	0.0210599
1	94646042	chr1:94646042:C:T	C	T	-0.756749	0.0335159
1	94698170	chr1:94698170:G:A	G	A	1.04991	0.00125849
1	94699409	chr1:94699409:C:A	C	A	-1.28574	0.0412147
1	94849864	chr1:94849864:T:C	T	C	1.20907	0.0487717
1	94945045	chr1:94945045:C:A	C	A	0.866945	0.0497517
1	94963761	chr1:94963761:C:T	C	T	-1.17732	0.030544
1	95372130	chr1:95372130:A:G	A	G	1.29685	0.000240841
1	95392489	chr1:95392489:C:T	C	T	0.929948	0.0401279
1	95394089	chr1:95394089:G:A	G	A	-0.870858	0.0369494
1	95682626	chr1:95682626:A:G	A	G	0.779605	0.0448034
1	95684308	chr1:95684308:G:T	G	T	-0.894775	0.00678695
1	96002561	chr1:96002561:G:A	G	A	0.643786	0.0338274
1	97207827	chr1:97207827:T:C	T	C	0.944623	0.0254851
1	97215786	chr1:97215786:T:C	T	C	-0.588613	0.0483426
1	97337177	chr1:97337177:C:T	C	T	-2.19544	0.00688301
1	97412887	chr1:97412887:C:A	C	A	1.41384	0.0217592
1	97530481	chr1:97530481:G:T	G	T	-0.687223	0.0241295
1	98138581	chr1:98138581:G:T	G	T	1.12862	0.0402119
1	98318166	chr1:98318166:A:G	A	G	0.786981	0.0426604
1	98835508	chr1:98835508:A:G	A	G	-1.19971	0.00852355
1	99749078	chr1:99749078:C:T	C	T	-0.880119	0.0123051
1	99769870	chr1:99769870:T:C	T	C	0.854791	0.00482264
1	99815635	chr1:99815635:G:T	G	T	1.54812	0.0289204
1	99857220	chr1:99857220:C:T	C	T	-1.00751	0.00202237
1	99980051	chr1:99980051:C:A	C	A	-1.3535	0.0236763
1	100203758	chr1:100203758:C:T	C	T	1.18842	0.0153364
1	100346548	chr1:100346548:T:C	T	C	1.49967	0.039436
1	100526278	chr1:100526278:G:A	G	A	-0.659097	0.032655
1	100567476	chr1:100567476:A:G	A	G	1.34828	0.00558453
1	100747976	chr1:100747976:A:G	A	G	0.91758	0.00344352
1	100847011	chr1:100847011:G:A	G	A	1.06976	0.0119925
1	100896815	chr1:100896815:C:A	C	A	2.34327	0.0299755
1	101104984	chr1:101104984:T:C	T	C	-0.917882	0.00279228
1	101188540	chr1:101188540:A:C	A	C	0.886422	0.0163211
1	101194566	chr1:101194566:T:G	T	G	-0.806489	0.0168966
1	101218713	chr1:101218713:C:T	C	T	-0.662276	0.0251867
1	101221942	chr1:101221942:T:C	T	C	0.790674	0.0365827
1	101275627	chr1:101275627:T:C	T	C	-1.19923	0.0490109
1	101380290	chr1:101380290:C:T	C	T	-1.33814	0.0264596
1	101383163	chr1:101383163:C:T	C	T	-1.1204	0.000458729
1	101383867	chr1:101383867:G:A	G	A	0.706533	0.024339
1	101412978	chr1:101412978:G:A	G	A	1.38768	0.0268937
1	101480607	chr1:101480607:G:A	G	A	-1.12901	0.00945119
1	101704739	chr1:101704739:C:T	C	T	-1.63553	0.0151526
1	101723916	chr1:101723916:A:G	A	G	0.827797	0.00794403
1	101732234	chr1:101732234:T:G	T	G	-0.685304	0.038714
1	101810778	chr1:101810778:C:T	C	T	0.81524	0.00484219
1	101821678	chr1:101821678:C:T	C	T	0.855868	0.00802092
1	101823629	chr1:101823629:T:G	T	G	-0.717044	0.0178632
1	101845150	chr1:101845150:A:C	A	C	-1.09028	0.00129575
1	101910332	chr1:101910332:A:G	A	G	0.682966	0.0252087
1	101945591	chr1:101945591:A:C	A	C	-1.12181	0.00100657
1	102039050	chr1:102039050:T:C	T	C	0.915037	0.0326087
1	102133732	chr1:102133732:C:T	C	T	-0.648403	0.0291675
1	102160040	chr1:102160040:C:A	C	A	-1.10872	0.0475486
1	102444443	chr1:102444443:C:T	C	T	-0.930526	0.00562362
1	103272478	chr1:103272478:C:T	C	T	2.49507	0.0256855
1	103335739	chr1:103335739:A:G	A	G	0.737387	0.0236346
1	103347535	chr1:103347535:T:C	T	C	0.640575	0.0465332
1	103485942	chr1:103485942:T:C	T	C	-1.17414	0.0451592
1	103615976	chr1:103615976:G:A	G	A	1.67507	0.0457444
1	103772967	chr1:103772967:C:T	C	T	-0.801922	0.0145594
1	103790968	chr1:103790968:C:T	C	T	-1.67025	0.018865
1	103929762	chr1:103929762:G:A	G	A	1.0314	0.0112009
1	103947557	chr1:103947557:C:A	C	A	-0.626459	0.0356834
1	103950894	chr1:103950894:G:A	G	A	1.4289	0.00625326
1	104044140	chr1:104044140:G:A	G	A	0.645855	0.0468421
1	104531644	chr1:104531644:G:A	G	A	0.989738	0.0174436
1	104536109	chr1:104536109:A:G	A	G	-0.760623	0.0143005
1	104642240	chr1:104642240:C:T	C	T	-0.850655	0.0264769
1	104652991	chr1:104652991:G:A	G	A	-0.925389	0.048377
1	104770001	chr1:104770001:A:G	A	G	-0.68744	0.0238407
1	104792831	chr1:104792831:A:G	A	G	0.744874	0.0292037
1	105575102	chr1:105575102:G:A	G	A	-0.83312	0.00863375
1	105720918	chr1:105720918:C:A	C	A	-0.98337	0.00151559
1	105725768	chr1:105725768:A:G	A	G	1.11812	0.00218473
1	106104486	chr1:106104486:G:T	G	T	1.49079	0.00644256
1	106251178	chr1:106251178:A:G	A	G	1.10931	0.00591059
1	106539740	chr1:106539740:T:C	T	C	-0.826521	0.0396504
1	106789932	chr1:106789932:T:C	T	C	0.758707	0.048771
1	106994177	chr1:106994177:T:C	T	C	-1.22234	0.0340008
1	107106567	chr1:107106567:A:G	A	G	0.977377	0.0296678
1	107243612	chr1:107243612:A:G	A	G	1.7824	0.0291238
1	107300217	chr1:107300217:G:T	G	T	0.980229	0.00299619
1	107316048	chr1:107316048:C:T	C	T	0.733805	0.0201778
1	107377597	chr1:107377597:C:T	C	T	-1.13651	0.0399817
1	107475930	chr1:107475930:C:T	C	T	0.623175	0.0336988
1	107492623	chr1:107492623:C:T	C	T	1.26289	0.0298963
1	107528167	chr1:107528167:C:T	C	T	-1.33276	0.00841945
1	107697302	chr1:107697302:A:G	A	G	1.20247	0.00807054
1	108005230	chr1:108005230:G:A	G	A	-1.33133	0.0230465
1	108528626	chr1:108528626:C:T	C	T	0.652819	0.0379462
1	108813594	chr1:108813594:T:C	T	C	-1.01314	0.00287411
1	108829613	chr1:108829613:G:A	G	A	1.09926	0.00315075
1	109098152	chr1:109098152:T:C	T	C	0.818506	0.0126026
1	109194692	chr1:109194692:T:C	T	C	1.1485	0.0314326
1	109709124	chr1:109709124:G:A	G	A	-0.729995	0.017075
1	109758638	chr1:109758638:C:T	C	T	-0.957377	0.0210442
1	109809255	chr1:109809255:G:A	G	A	2.14831	0.00222022
1	109875807	chr1:109875807:C:A	C	A	-0.62301	0.0371128
1	109943927	chr1:109943927:C:A	C	A	1.04866	0.0443097
1	110135299	chr1:110135299:A:C	A	C	-0.989628	0.0124651
1	110438215	chr1:110438215:A:G	A	G	-0.809074	0.0450832
1	110445953	chr1:110445953:G:A	G	A	1.19034	0.0277484
1	110467039	chr1:110467039:C:T	C	T	-0.849771	0.0358193
1	110476949	chr1:110476949:T:G	T	G	-0.819989	0.0149392
1	110489060	chr1:110489060:G:A	G	A	-0.987126	0.00316797
1	110559915	chr1:110559915:C:T	C	T	1.14905	0.0285176
1	110582859	chr1:110582859:C:T	C	T	0.916404	0.00971821
1	110619055	chr1:110619055:G:A	G	A	-1.1103	0.0342707
1	110664263	chr1:110664263:C:T	C	T	0.924047	0.00339581
1	110789644	chr1:110789644:C:T	C	T	1.08397	0.0111717
1	110833536	chr1:110833536:G:A	G	A	-0.680458	0.0382834
1	110878805	chr1:110878805:G:T	G	T	0.595492	0.0400023
1	111016696	chr1:111016696:T:C	T	C	-1.21382	0.0115001
1	111241360	chr1:111241360:C:A	C	A	-0.812958	0.0466286
1	111388629	chr1:111388629:C:A	C	A	0.858525	0.0138258
1	111504723	chr1:111504723:A:G	A	G	1.05953	0.0190463
1	111838606	chr1:111838606:G:A	G	A	0.707193	0.0310708
1	111895342	chr1:111895342:T:C	T	C	-0.968479	0.0492215
1	111925002	chr1:111925002:C:T	C	T	-3.03419	0.0114537
1	112019071	chr1:112019071:C:A	C	A	0.81134	0.0153126
1	112148374	chr1:112148374:A:G	A	G	-0.909648	0.00375342
1	112244954	chr1:112244954:C:T	C	T	1.2041	0.0318704
1	112299352	chr1:112299352:T:C	T	C	-1.16696	0.0352436
1	112483660	chr1:112483660:A:G	A	G	0.593946	0.0391079
1	112550047	chr1:112550047:G:T	G	T	-2.27872	0.037845
1	112617108	chr1:112617108:G:T	G	T	-1.94406	0.00448707
1	112788512	chr1:112788512:C:T	C	T	0.650836	0.0264016
1	112810313	chr1:112810313:A:G	A	G	-1.40793	0.0266653
1	113304960	chr1:113304960:T:C	T	C	1.44335	0.0482696
1	113783292	chr1:113783292:A:G	A	G	-0.740447	0.0190952
1	113973095	chr1:113973095:G:A	G	A	0.708181	0.0209881
1	114081245	chr1:114081245:C:T	C	T	-0.646178	0.0275971
1	114108454	chr1:114108454:G:A	G	A	-0.777989	0.0106629
1	114223899	chr1:114223899:T:C	T	C	0.690175	0.0439926
1	114257485	chr1:114257485:T:C	T	C	0.720884	0.0123111
1	114315590	chr1:114315590:T:C	T	C	0.872451	0.0210756
1	114334813	chr1:114334813:G:A	G	A	0.937678	0.0333638
1	114346160	chr1:114346160:A:G	A	G	1.41121	0.0113878
1	114366037	chr1:114366037:G:A	G	A	0.706194	0.0309299
1	115112782	chr1:115112782:C:A	C	A	0.875356	0.02252
1	115286692	chr1:115286692:G:A	G	A	-0.657599	0.0478692
1	115297050	chr1:115297050:T:C	T	C	-0.969365	0.00248629
1	115305767	chr1:115305767:C:T	C	T	-0.607016	0.0481622
1	115324650	chr1:115324650:G:A	G	A	-0.922561	0.00499826
1	115387822	chr1:115387822:C:T	C	T	-2.53709	0.0222528
1	115421213	chr1:115421213:C:T	C	T	1.48053	0.000359221
1	115453810	chr1:115453810:A:C	A	C	-0.883774	0.00400919
1	115461911	chr1:115461911:C:T	C	T	-0.867798	0.0329342
1	115462420	chr1:115462420:A:C	A	C	-1.77223	0.0337457
1	115474043	chr1:115474043:A:G	A	G	-1.83063	1.23423e-05
1	115478476	chr1:115478476:T:G	T	G	0.761632	0.0138295
1	115478963	chr1:115478963:A:G	A	G	0.678263	0.0295269
1	115512469	chr1:115512469:G:A	G	A	-0.82681	0.0225327
1	115618541	chr1:115618541:A:G	A	G	-0.706214	0.0241192
1	115661243	chr1:115661243:A:G	A	G	-0.626895	0.044056
1	115696747	chr1:115696747:G:A	G	A	-0.664813	0.0284219
1	115746114	chr1:115746114:G:A	G	A	0.918075	0.0238167
1	115830585	chr1:115830585:T:C	T	C	0.805099	0.0166579
1	115841469	chr1:115841469:G:A	G	A	-0.651441	0.0481987
1	115862175	chr1:115862175:G:A	G	A	0.930262	0.0094702
1	116635423	chr1:116635423:C:T	C	T	-2.28101	0.0369368
1	116734566	chr1:116734566:A:G	A	G	1.67786	0.00244609
1	117011799	chr1:117011799:A:G	A	G	1.03003	0.0266666
1	117051842	chr1:117051842:A:G	A	G	0.645073	0.0307339
1	117563454	chr1:117563454:C:T	C	T	-1.05015	0.0414066
1	117640170	chr1:117640170:T:C	T	C	-0.66693	0.0371972
1	117735653	chr1:117735653:T:C	T	C	-0.687703	0.0308261
1	118349525	chr1:118349525:T:C	T	C	-0.631641	0.043225
1	118866950	chr1:118866950:T:C	T	C	0.750641	0.0482539
1	118952350	chr1:118952350:A:G	A	G	0.974482	0.0379564
1	119220917	chr1:119220917:G:T	G	T	1.5741	0.0203384
1	119398965	chr1:119398965:T:G	T	G	1.5622	0.00156615
1	119490464	chr1:119490464:T:C	T	C	1.55026	0.000652314
1	119609771	chr1:119609771:G:A	G	A	-1.67695	0.00166705
1	119622502	chr1:119622502:G:A	G	A	-1.31272	0.000750981
1	119641886	chr1:119641886:A:C	A	C	-1.31253	0.00142992
1	119656566	chr1:119656566:C:T	C	T	0.76207	0.0146834
1	119875876	chr1:119875876:G:T	G	T	-2.36602	0.0238731
1	119889558	chr1:119889558:G:A	G	A	-0.620061	0.0486648
1	147524330	chr1:147524330:C:T	C	T	0.993707	0.0279679
1	147757554	chr1:147757554:G:A	G	A	-1.543	0.0126012
1	147776970	chr1:147776970:G:A	G	A	0.803704	0.0156373
1	147907240	chr1:147907240:C:A	C	A	1.97881	0.0160171
1	148279024	chr1:148279024:G:T	G	T	-0.822098	0.0411904
1	150519487	chr1:150519487:G:A	G	A	1.41599	0.0476035
1	151021390	chr1:151021390:G:A	G	A	0.690572	0.0399105
1	151388675	chr1:151388675:A:G	A	G	1.12917	0.0470158
1	151803755	chr1:151803755:C:T	C	T	0.958023	0.00281503
1	151809614	chr1:151809614:T:C	T	C	-0.661847	0.0493774
1	151822318	chr1:151822318:G:A	G	A	-1.03829	0.0114049
1	152717972	chr1:152717972:T:C	T	C	-0.742616	0.0420103
1	153492513	chr1:153492513:C:A	C	A	-1.4133	0.00588092
1	153530179	chr1:153530179:C:T	C	T	1.5481	0.00345066
1	154681475	chr1:154681475:C:T	C	T	0.82795	0.023526
1	154686866	chr1:154686866:A:G	A	G	-0.980815	0.0307269
1	154728742	chr1:154728742:T:C	T	C	0.965792	0.0405452
1	154740865	chr1:154740865:T:C	T	C	1.55913	0.0235828
1	154744675	chr1:154744675:A:G	A	G	1.03007	0.0299287
1	154766923	chr1:154766923:T:C	T	C	2.12533	0.0088627
1	154801971	chr1:154801971:T:C	T	C	1.42025	0.0224133
1	154804681	chr1:154804681:G:A	G	A	-1.63364	0.0181731
1	154822368	chr1:154822368:G:A	G	A	-2.52873	0.0220289
1	155007875	chr1:155007875:C:T	C	T	-0.695988	0.0370964
1	156063096	chr1:156063096:G:A	G	A	0.714436	0.0362609
1	156675791	chr1:156675791:A:G	A	G	1.01306	0.0182526
1	156844686	chr1:156844686:G:A	G	A	1.12021	0.0154239
1	157083934	chr1:157083934:C:T	C	T	-1.05817	0.0361188
1	157106459	chr1:157106459:C:T	C	T	0.994516	0.042079
1	157158262	chr1:157158262:G:A	G	A	0.909453	0.0220829
1	157232664	chr1:157232664:A:G	A	G	0.879985	0.0135847
1	157373172	chr1:157373172:G:A	G	A	-0.961817	0.00519598
1	157388825	chr1:157388825:G:A	G	A	1.07613	0.00542661
1	157416449	chr1:157416449:G:A	G	A	0.804047	0.0223952
1	157421264	chr1:157421264:C:T	C	T	1.41648	0.0418225
1	157451610	chr1:157451610:A:G	A	G	0.650632	0.043009
1	157503767	chr1:157503767:G:A	G	A	1.78535	0.0300133
1	157508206	chr1:157508206:C:T	C	T	-0.949442	0.00988624
1	157821373	chr1:157821373:G:T	G	T	1.35868	0.0374383
1	157841795	chr1:157841795:G:T	G	T	-1.2318	0.042035
1	157843963	chr1:157843963:C:T	C	T	0.944388	0.0167471
1	158002738	chr1:158002738:T:C	T	C	-0.600461	0.0478132
1	158617600	chr1:158617600:C:T	C	T	-0.695112	0.0329429
1	158734859	chr1:158734859:T:C	T	C	-0.831211	0.0215879
1	159176900	chr1:159176900:C:A	C	A	0.984534	0.0463577
1	159245536	chr1:159245536:C:T	C	T	1.04785	0.0473572
1	159286004	chr1:159286004:G:A	G	A	0.907342	0.0153357
1	159557690	chr1:159557690:T:C	T	C	-0.775913	0.0401247
1	159607683	chr1:159607683:C:A	C	A	-0.972809	0.0104766
1	159773851	chr1:159773851:G:A	G	A	-2.30087	0.0420556
1	159791643	chr1:159791643:C:T	C	T	1.41657	0.0468135
1	159857685	chr1:159857685:G:A	G	A	-0.72428	0.0415697
1	160061540	chr1:160061540:T:C	T	C	0.802676	0.0458289
1	160154052	chr1:160154052:A:G	A	G	0.886797	0.0372241
1	160379308	chr1:160379308:G:T	G	T	-0.613465	0.0418786
1	160406270	chr1:160406270:C:T	C	T	1.71407	0.0384144
1	160435343	chr1:160435343:T:C	T	C	-0.869901	0.0264446
1	160656085	chr1:160656085:A:G	A	G	-1.01224	0.0143086
1	160681667	chr1:160681667:T:C	T	C	1.02638	0.0385968
1	160726514	chr1:160726514:T:C	T	C	-0.947733	0.0403807
1	161208894	chr1:161208894:T:C	T	C	-1.04966	0.00307512
1	161242151	chr1:161242151:C:T	C	T	1.03315	0.0215865
1	161511777	chr1:161511777:G:T	G	T	1.13937	0.0429447
1	161598196	chr1:161598196:G:A	G	A	0.977174	0.00364171
1	161646947	chr1:161646947:C:A	C	A	-1.40373	0.00260388
1	162369964	chr1:162369964:C:T	C	T	-1.13401	0.0100084
1	162473995	chr1:162473995:A:G	A	G	1.28522	0.00243381
1	162510355	chr1:162510355:A:G	A	G	-0.730267	0.025016
1	162818318	chr1:162818318:A:C	A	C	1.42146	0.0120479
1	162838714	chr1:162838714:G:A	G	A	1.34206	0.0246349
1	162867712	chr1:162867712:C:T	C	T	0.938376	0.0110448
1	162894523	chr1:162894523:T:C	T	C	0.653018	0.0499913
1	162955527	chr1:162955527:G:A	G	A	-1.51131	0.0344945
1	162988613	chr1:162988613:C:A	C	A	0.786219	0.0254328
1	163515274	chr1:163515274:A:G	A	G	-0.668468	0.045453
1	163548745	chr1:163548745:G:T	G	T	0.857588	0.0180089
1	163761984	chr1:163761984:G:A	G	A	-0.665837	0.0437076
1	163853459	chr1:163853459:G:A	G	A	1.02487	0.0467508
1	163986216	chr1:163986216:A:G	A	G	-0.768175	0.0296805
1	164073669	chr1:164073669:A:C	A	C	-0.716615	0.0457551
1	164256574	chr1:164256574:C:T	C	T	0.978018	0.0328734
1	164273128	chr1:164273128:T:C	T	C	1.03072	0.00612429
1	164440112	chr1:164440112:A:G	A	G	0.790081	0.0270379
1	164650473	chr1:164650473:G:T	G	T	-0.729041	0.0491939
1	164664819	chr1:164664819:T:C	T	C	2.06916	0.00285425
1	164696410	chr1:164696410:T:C	T	C	1.39125	0.0122193
1	164732079	chr1:164732079:C:T	C	T	-2.70998	0.0197539
1	164743565	chr1:164743565:G:T	G	T	-1.17695	0.00870825
1	165207118	chr1:165207118:T:C	T	C	0.905149	0.0263572
1	165395103	chr1:165395103:A:G	A	G	0.889125	0.0107379
1	165439858	chr1:165439858:G:A	G	A	1.18365	0.00647032
1	165445274	chr1:165445274:C:A	C	A	0.95475	0.00972984
1	165470188	chr1:165470188:G:A	G	A	1.13075	0.0285796
1	165630314	chr1:165630314:T:C	T	C	0.78216	0.0280181
1	165649083	chr1:165649083:G:T	G	T	1.23975	0.0235794
1	165652541	chr1:165652541:T:C	T	C	-0.825862	0.0166201
1	165839750	chr1:165839750:A:G	A	G	0.68909	0.038196
1	165858251	chr1:165858251:G:T	G	T	0.915566	0.0280078
1	165896241	chr1:165896241:G:A	G	A	1.13378	0.0168407
1	166406146	chr1:166406146:C:T	C	T	0.840378	0.0328669
1	166489589	chr1:166489589:T:C	T	C	1.167	0.036713
1	166530786	chr1:166530786:G:A	G	A	-1.39998	0.0185684
1	166796239	chr1:166796239:A:C	A	C	1.07658	0.0384743
1	167190468	chr1:167190468:A:C	A	C	-1.6455	0.0422937
1	167467083	chr1:167467083:C:T	C	T	0.916053	0.0229273
1	167528575	chr1:167528575:C:A	C	A	1.17059	0.0180052
1	167593579	chr1:167593579:C:A	C	A	-1.0908	0.029913
1	167673257	chr1:167673257:T:C	T	C	0.703386	0.0380865
1	167675003	chr1:167675003:A:G	A	G	-0.798288	0.0378598
1	167837692	chr1:167837692:G:T	G	T	1.37357	0.0131067
1	168134307	chr1:168134307:A:G	A	G	0.897597	0.0207654
1	168214040	chr1:168214040:G:A	G	A	0.768376	0.0257722
1	168288230	chr1:168288230:C:T	C	T	-0.926707	0.00705762
1	168299502	chr1:168299502:G:T	G	T	1.43671	0.00953057
1	168306715	chr1:168306715:T:C	T	C	1.48236	0.035096
1	168379490	chr1:168379490:G:A	G	A	-0.781406	0.0351559
1	168398746	chr1:168398746:C:T	C	T	1.48687	0.00398354
1	168408922	chr1:168408922:T:C	T	C	1.01298	0.00393219
1	168454903	chr1:168454903:C:T	C	T	0.751128	0.0293689
1	168460509	chr1:168460509:A:G	A	G	1.07467	0.0178435
1	168544770	chr1:168544770:C:T	C	T	-0.794382	0.0276379
1	168615999	chr1:168615999:C:T	C	T	-1.25809	0.0467297
1	168619944	chr1:168619944:T:G	T	G	0.898446	0.0257437
1	168649403	chr1:168649403:G:A	G	A	-1.51271	0.0137564
1	168773119	chr1:168773119:C:T	C	T	-0.970092	0.0214411
1	168779348	chr1:168779348:G:A	G	A	1.25012	0.0225078
1	168931050	chr1:168931050:G:A	G	A	-0.748193	0.0378787
1	169025275	chr1:169025275:C:T	C	T	-0.724376	0.0248335
1	169031153	chr1:169031153:A:C	A	C	-1.44738	0.0089623
1	169084687	chr1:169084687:G:A	G	A	1.15341	0.0167857
1	169119099	chr1:169119099:A:C	A	C	1.06076	0.00735497
1	169128225	chr1:169128225:G:A	G	A	-1.27039	0.000970813
1	169183718	chr1:169183718:C:T	C	T	1.06898	0.0227373
1	169223786	chr1:169223786:T:G	T	G	-1.72408	0.037847
1	169383840	chr1:169383840:T:C	T	C	-0.865751	0.0173848
1	169464882	chr1:169464882:T:C	T	C	0.886081	0.0322015
1	169489865	chr1:169489865:G:T	G	T	-1.4358	0.00098767
1	169494280	chr1:169494280:A:G	A	G	-1.54426	0.0023546
1	169543405	chr1:169543405:A:C	A	C	-0.741163	0.0316749
1	170162135	chr1:170162135:C:T	C	T	0.793706	0.0390038
1	170275090	chr1:170275090:T:G	T	G	0.807834	0.0464759
1	170568177	chr1:170568177:A:G	A	G	1.22374	0.00606533
1	170599355	chr1:170599355:C:T	C	T	-0.77653	0.0396487
1	170618199	chr1:170618199:C:T	C	T	-1.02063	0.00332735
1	170761949	chr1:170761949:G:A	G	A	-2.24392	0.0383928
1	171405127	chr1:171405127:A:C	A	C	0.792518	0.0375206
1	171437710	chr1:171437710:A:G	A	G	1.87035	0.00796432
1	171627526	chr1:171627526:A:G	A	G	-0.795796	0.0353819
1	172011063	chr1:172011063:T:G	T	G	1.26711	0.0330861
1	172712412	chr1:172712412:C:A	C	A	-1.3302	0.0208331
1	172990347	chr1:172990347:G:A	G	A	-1.9196	0.00235381
1	173044627	chr1:173044627:C:A	C	A	1.01249	0.0094307
1	173072730	chr1:173072730:G:A	G	A	1.7529	0.00609149
1	173127944	chr1:173127944:T:C	T	C	-0.962446	0.00930525
1	173194429	chr1:173194429:A:G	A	G	-0.722087	0.0406578
1	173366957	chr1:173366957:G:A	G	A	0.88012	0.0126764
1	173523090	chr1:173523090:T:G	T	G	1.34177	0.029111
1	175209388	chr1:175209388:G:A	G	A	-0.904201	0.0195175
1	175218415	chr1:175218415:G:A	G	A	-1.587	0.0256419
1	175457306	chr1:175457306:G:A	G	A	0.867243	0.00985319
1	175479327	chr1:175479327:G:A	G	A	0.741084	0.0218452
1	175492708	chr1:175492708:C:T	C	T	-1.16507	0.00309063
1	175607692	chr1:175607692:A:G	A	G	-1.15492	0.00255875
1	176559085	chr1:176559085:G:A	G	A	-2.20917	0.0423398
1	176850739	chr1:176850739:T:C	T	C	-1.75841	0.0101171
1	176950795	chr1:176950795:T:C	T	C	-0.84832	0.0292692
1	177045395	chr1:177045395:G:A	G	A	1.02114	0.0232085
1	177092122	chr1:177092122:G:T	G	T	-1.29305	0.00404131
1	177396824	chr1:177396824:T:C	T	C	-1.02057	0.0471839
1	177518557	chr1:177518557:A:C	A	C	0.919253	0.0108057
1	177725363	chr1:177725363:A:G	A	G	-2.12334	0.00967421
1	177870382	chr1:177870382:G:A	G	A	-1.67529	0.00471474
1	177898724	chr1:177898724:G:A	G	A	1.25298	0.000695683
1	177911780	chr1:177911780:G:A	G	A	-0.786156	0.0281499
1	177932578	chr1:177932578:T:C	T	C	-1.14433	0.000318866
1	177982850	chr1:177982850:C:A	C	A	0.933825	0.0144316
1	178060929	chr1:178060929:A:G	A	G	1.58207	0.00325588
1	178108860	chr1:178108860:C:T	C	T	-0.958257	0.0238265
1	178391079	chr1:178391079:T:G	T	G	-1.16971	0.0445366
1	178404982	chr1:178404982:G:A	G	A	0.674919	0.0394879
1	178489315	chr1:178489315:G:A	G	A	-1.22585	0.00591503
1	178719140	chr1:178719140:G:T	G	T	0.956935	0.033079
1	178981557	chr1:178981557:T:C	T	C	0.824927	0.02631
1	178989912	chr1:178989912:C:T	C	T	1.24962	0.0282862
1	179340854	chr1:179340854:T:C	T	C	0.73435	0.0341128
1	179547581	chr1:179547581:A:G	A	G	-1.24866	0.00177729
1	179600587	chr1:179600587:C:T	C	T	1.09316	0.00424085
1	179718124	chr1:179718124:A:G	A	G	0.883245	0.0108911
1	180259833	chr1:180259833:T:C	T	C	1.62112	0.0210945
1	180561303	chr1:180561303:T:G	T	G	1.16976	0.0318746
1	180579973	chr1:180579973:T:C	T	C	0.658642	0.0288693
1	181003227	chr1:181003227:G:T	G	T	-1.07834	0.00565432
1	181051045	chr1:181051045:T:C	T	C	0.783317	0.0441775
1	181185699	chr1:181185699:G:A	G	A	-1.08973	0.0293665
1	181247428	chr1:181247428:G:A	G	A	-0.697088	0.0408582
1	181365509	chr1:181365509:A:G	A	G	0.702167	0.0283979
1	181674575	chr1:181674575:T:C	T	C	-0.685098	0.0232802
1	181735166	chr1:181735166:G:A	G	A	-1.5393	0.00238583
1	181852349	chr1:181852349:G:A	G	A	-0.71007	0.0260023
1	181858962	chr1:181858962:A:G	A	G	-0.757488	0.0389772
1	182108545	chr1:182108545:G:A	G	A	-1.28695	0.0475521
1	182329649	chr1:182329649:G:A	G	A	0.625379	0.0429521
1	182337627	chr1:182337627:A:G	A	G	-1.60018	0.0095236
1	182608250	chr1:182608250:A:G	A	G	0.601117	0.0437795
1	182633189	chr1:182633189:T:C	T	C	-0.950273	0.0156242
1	182711557	chr1:182711557:G:T	G	T	-0.812814	0.0229241
1	182737470	chr1:182737470:G:A	G	A	-0.947715	0.00405645
1	182808884	chr1:182808884:G:A	G	A	1.07562	0.0225016
1	182951577	chr1:182951577:G:T	G	T	1.35912	0.041971
1	183161488	chr1:183161488:C:T	C	T	-2.50138	0.022221
1	183220196	chr1:183220196:G:A	G	A	-0.691943	0.0222564
1	183272310	chr1:183272310:T:G	T	G	-0.835826	0.0489669
1	183284824	chr1:183284824:T:G	T	G	0.739809	0.0200981
1	183302913	chr1:183302913:G:A	G	A	-2.71275e-13	0.012414
1	183703597	chr1:183703597:C:T	C	T	-1.78604	0.00187853
1	183818883	chr1:183818883:A:C	A	C	-0.842694	0.0163521
1	184194268	chr1:184194268:T:C	T	C	0.743436	0.0388018
1	184319171	chr1:184319171:A:G	A	G	0.906368	0.0470138
1	184568687	chr1:184568687:T:C	T	C	-1.58495	0.0251736
1	184653307	chr1:184653307:A:G	A	G	-0.892263	0.00669008
1	185441546	chr1:185441546:T:C	T	C	-0.920749	0.0453828
1	185503234	chr1:185503234:C:T	C	T	-0.832799	0.0485967
1	185896419	chr1:185896419:G:A	G	A	1.268	0.0236853
1	186337932	chr1:186337932:T:G	T	G	-1.74984	0.0325329
1	186344117	chr1:186344117:A:G	A	G	1.05317	0.0362382
1	186571710	chr1:186571710:T:C	T	C	-1.1125	0.0175242
1	186663185	chr1:186663185:C:T	C	T	-1.17729	0.0132277
1	186880054	chr1:186880054:A:G	A	G	0.96573	0.00871174
1	187034667	chr1:187034667:G:T	G	T	-0.641809	0.0438623
1	187035815	chr1:187035815:T:G	T	G	1.23193	0.0233677
1	187090046	chr1:187090046:A:G	A	G	-0.847951	0.0476646
1	187103458	chr1:187103458:T:C	T	C	0.784415	0.0242608
1	187103528	chr1:187103528:C:T	C	T	0.945323	0.00579049
1	187293986	chr1:187293986:A:G	A	G	-1.05032	0.00533
1	187445117	chr1:187445117:G:T	G	T	1.0024	0.0391756
1	187475424	chr1:187475424:A:G	A	G	1.71708	0.0131003
1	187487328	chr1:187487328:C:T	C	T	-0.947209	0.0317194
1	187863771	chr1:187863771:G:A	G	A	0.737104	0.0149972
1	187926629	chr1:187926629:A:C	A	C	-0.6236	0.0381599
1	187929868	chr1:187929868:A:C	A	C	1.24772	0.0395982
1	188483527	chr1:188483527:A:C	A	C	-0.596394	0.0389027
[truncated: 20,034 more rows]

## Sheet: S6
CHR	POS	SNP	REF	ALT	BETA	P
[truncated: 4,711 more rows]

[truncated: 3 more sheets: S7, S8, S9]
